# Supplementary material for: The impact of peer attachment on prosocial behavior, emotional difficulties and conduct problems in adolescence: The mediating role of empathy
Source: PubMed Central journal article supplement (PMC6953841; doi:10.1371/journal.pone.0227627), 2020-01-10
Supplement: pone.0227627.s001.pdf [file pone.0227627.s001.pdf]

| Gender | Age   | School | Year | IPPA_A1 | IPPA_A2 | IPPA_A3 | IPPA_A4 | IPPA_A5 |
|--------|-------|--------|------|---------|---------|---------|---------|---------|
| 1,00   | 12,00 | 6,00   | 1    | 5       | 5       | 5       | 1       | 1       |
| 1,00   | 12,00 | 6,00   | 1    | 5       | 3       | 4       | 1       | 1       |
| 1,00   | 12,00 | 11,00  | 1    | 5       | 4       | 4       | 2       | 1       |
| 1,00   | 12,00 | 8,00   | 1    | 5       | 5       | 5       | 1       | 1       |
| 1,00   | 12,00 | 2,00   | 1    | 4       | 5       | 3       | 5       | 1       |
| 1,00   | 12,00 | 11,00  | 1    | 4       | 4       | 3       | 2       | 1       |
| 1,00   | 12,00 | 11,00  | 1    | 3       | 4       | 4       | 2       | 5       |
| 1,00   | 12,00 | 7,00   | 1    | 5       | 4       | 5       | 3       | 1       |
| 1,00   | 12,00 | 6,00   | 1    | 5       | 4       | 3       | 2       | 1       |
| 1,00   | 12,00 | 5,00   | 1    | 5       | 5       | 5       | 1       | 1       |
| 1,00   | 13,00 | 5,00   | 1    | 5       | 4       | 3       | 1       | 2       |
| 1,00   | 12,00 | 4,00   | 1    | 4       | 5       | 5       | 1       | 1       |
| 1,00   | 12,00 | 4,00   | 1    | 4       | 3       | 3       | 3       | 3       |
| 1,00   | 12,00 | 3,00   | 1    | 4       | 3       | 4       | 1       | 1       |
| 1,00   | 12,00 | 2,00   | 1    | 5       | 4       | 3       | 2       | 2       |
| 1,00   | 12,00 | 11,00  | 1    | 3       | 5       | 3       | 2       | 1       |
| 1,00   | 12,00 | 11,00  | 1    | 5       | 5       | 2       | 3       | 3       |
| 1,00   | 12,00 | 11,00  | 1    | 5       | 4       | 3       | 2       | 1       |
| 1,00   | 12,00 | 11,00  | 1    | 4       | 2       | 1       | 3       | 1       |
| 1,00   | 12,00 | 11,00  | 1    | 4       | 3       | 3       | 2       | 3       |
| 1,00   | 12,00 | 8,00   | 1    | 5       | 5       | 3       | 2       | 1       |
| 1,00   | 13,00 | 8,00   | 1    | 4       | 5       | 4       | 4       | 2       |
| 1,00   | 13,00 | 8,00   | 1    | 4       | 4       | 4       | 1       | 1       |
| 1,00   | 14,00 | 8,00   | 1    | 4       | 5       | 3       | 4       | 3       |
| 1,00   | 14,00 | 8,00   | 1    | 5       | 5       | 5       | 3       | 1       |
| 1,00   | 12,00 | 7,00   | 1    | 4       | 3       | 3       | 2       | 1       |
| 1,00   | 12,00 | 7,00   | 1    | 5       | 4       | 4       | 3       | 1       |
| 1,00   | 12,00 | 7,00   | 1    | 5       | 3       | 999     | 5       | 1       |
| 1,00   | 12,00 | 7,00   | 1    | 2       | 3       | 4       | 999     | 1       |
| 1,00   | 12,00 | 7,00   | 1    | 5       | 5       | 5       | 1       | 1       |
| 1,00   | 12,00 | 5,00   | 1    | 5       | 5       | 5       | 1       | 1       |
| 1,00   | 12,00 | 4,00   | 1    | 999     | 3       | 3       | 999     | 3       |
| 1,00   | 12,00 | 4,00   | 1    | 5       | 5       | 3       | 1       | 1       |
| 1,00   | 12,00 | 4,00   | 1    | 5       | 4       | 5       | 1       | 1       |
| 1,00   | 12,00 | 3,00   | 1    | 3       | 4       | 4       | 2       | 1       |
| 1,00   | 12,00 | 3,00   | 1    | 3       | 3       | 3       | 5       | 4       |
| 1,00   | 12,00 | 3,00   | 1    | 4       | 4       | 3       | 2       | 5       |
| 1,00   | 12,00 | 3,00   | 1    | 4       | 5       | 4       | 1       | 1       |
| 1,00   | 13,00 | 3,00   | 1    | 4       | 4       | 4       | 3       | 2       |
| 1,00   | 13,00 | 3,00   | 1    | 4       | 3       | 4       | 2       | 1       |
| 1,00   | 12,00 | 11,00  | 1    | 5       | 5       | 4       | 1       | 1       |
| 1,00   | 12,00 | 11,00  | 1    | 5       | 5       | 4       | 1       | 1       |
| 1,00   | 12,00 | 11,00  | 1    | 5       | 3       | 2       | 3       | 4       |
| 1,00   | 12,00 | 11,00  | 1    | 4       | 1       | 4       | 1       | 5       |
| 1,00   | 12,00 | 11,00  | 1    | 3       | 4       | 2       | 2       | 3       |
| 1,00   | 13,00 | 11,00  | 1    | 4       | 4       | 3       | 3       | 4       |
| 1,00   | 12,00 | 8,00   | 1    | 5       | 5       | 3       | 1       | 1       |
| 1,00   | 12,00 | 8,00   | 1    | 5       | 4       | 3       | 2       | 1       |
| 1,00   | 13,00 | 8,00   | 1    | 2       | 4       | 4       | 1       | 1       |

|      |       |       |   |   |   |   |   |     |
|------|-------|-------|---|---|---|---|---|-----|
| 1,00 | 12,00 | 7,00  | 1 | 5 | 3 | 3 | 4 | 1   |
| 1,00 | 12,00 | 7,00  | 1 | 5 | 5 | 4 | 4 | 2   |
| 1,00 | 12,00 | 7,00  | 1 | 4 | 5 | 4 | 1 | 999 |
| 1,00 | 12,00 | 7,00  | 1 | 3 | 2 | 4 | 3 | 1   |
| 1,00 | 12,00 | 7,00  | 1 | 5 | 1 | 3 | 1 | 1   |
| 1,00 | 12,00 | 7,00  | 1 | 5 | 4 | 3 | 4 | 2   |
| 1,00 | 13,00 | 7,00  | 1 | 5 | 4 | 1 | 2 | 5   |
| 1,00 | 13,00 | 6,00  | 1 | 5 | 5 | 3 | 3 | 3   |
| 1,00 | 13,00 | 6,00  | 1 | 3 | 3 | 3 | 2 | 1   |
| 1,00 | 12,00 | 5,00  | 1 | 2 | 5 | 3 | 2 | 3   |
| 1,00 | 12,00 | 5,00  | 1 | 5 | 5 | 3 | 1 | 1   |
| 1,00 | 12,00 | 5,00  | 1 | 4 | 5 | 3 | 1 | 1   |
| 1,00 | 12,00 | 4,00  | 1 | 1 | 5 | 2 | 5 | 4   |
| 1,00 | 12,00 | 3,00  | 1 | 5 | 4 | 4 | 2 | 2   |
| 1,00 | 12,00 | 3,00  | 1 | 5 | 4 | 4 | 1 | 2   |
| 1,00 | 13,00 | 3,00  | 1 | 4 | 2 | 2 | 2 | 1   |
| 1,00 | 12,00 | 2,00  | 1 | 5 | 3 | 4 | 2 | 1   |
| 1,00 | 13,00 | 2,00  | 1 | 5 | 4 | 4 | 2 | 3   |
| 1,00 | 12,00 | 11,00 | 1 | 4 | 3 | 2 | 2 | 1   |
| 1,00 | 12,00 | 11,00 | 1 | 2 | 4 | 3 | 2 | 5   |
| 1,00 | 12,00 | 11,00 | 1 | 4 | 5 | 4 | 2 | 3   |
| 1,00 | 12,00 | 11,00 | 1 | 4 | 5 | 5 | 1 | 5   |
| 1,00 | 12,00 | 11,00 | 1 | 5 | 4 | 4 | 2 | 3   |
| 1,00 | 12,00 | 11,00 | 1 | 4 | 3 | 3 | 4 | 1   |
| 1,00 | 12,00 | 11,00 | 1 | 3 | 5 | 4 | 1 | 1   |
| 1,00 | 12,00 | 11,00 | 1 | 5 | 4 | 4 | 2 | 2   |
| 1,00 | 12,00 | 11,00 | 1 | 5 | 5 | 4 | 1 | 1   |
| 1,00 | 12,00 | 11,00 | 1 | 5 | 5 | 3 | 2 | 2   |
| 1,00 | 12,00 | 11,00 | 1 | 5 | 5 | 4 | 3 | 4   |
| 1,00 | 14,00 | 11,00 | 1 | 5 | 4 | 3 | 3 | 5   |
| 1,00 | 12,00 | 8,00  | 1 | 5 | 4 | 4 | 3 | 1   |
| 1,00 | 12,00 | 8,00  | 1 | 5 | 4 | 3 | 3 | 1   |
| 1,00 | 12,00 | 8,00  | 1 | 5 | 5 | 5 | 1 | 1   |
| 1,00 | 12,00 | 8,00  | 1 | 5 | 1 | 1 | 5 | 5   |
| 1,00 | 12,00 | 8,00  | 1 | 5 | 2 | 3 | 5 | 3   |
| 1,00 | 14,00 | 8,00  | 1 | 4 | 5 | 5 | 1 | 1   |
| 1,00 | 12,00 | 8,00  | 1 | 4 | 4 | 5 | 1 | 1   |
| 1,00 | 12,00 | 8,00  | 1 | 3 | 3 | 4 | 1 | 1   |
| 1,00 | 12,00 | 8,00  | 1 | 5 | 5 | 4 | 1 | 1   |
| 1,00 | 13,00 | 8,00  | 1 | 5 | 5 | 4 | 3 | 1   |
| 1,00 | 13,00 | 8,00  | 1 | 3 | 5 | 4 | 5 | 3   |
| 1,00 | 12,00 | 7,00  | 1 | 4 | 4 | 2 | 3 | 3   |
| 1,00 | 12,00 | 7,00  | 1 | 5 | 4 | 5 | 4 | 1   |
| 1,00 | 12,00 | 7,00  | 1 | 5 | 3 | 4 | 1 | 999 |
| 1,00 | 12,00 | 7,00  | 1 | 5 | 3 | 4 | 2 | 2   |
| 1,00 | 12,00 | 7,00  | 1 | 4 | 3 | 3 | 2 | 1   |
| 1,00 | 13,00 | 7,00  | 1 | 5 | 4 | 4 | 1 | 1   |
| 1,00 | 12,00 | 6,00  | 1 | 5 | 5 | 5 | 2 | 1   |
| 1,00 | 12,00 | 6,00  | 1 | 5 | 3 | 2 | 1 | 1   |
| 1,00 | 12,00 | 6,00  | 1 | 4 | 3 | 4 | 2 | 2   |

|      |       |       |   |   |     |   |   |     |
|------|-------|-------|---|---|-----|---|---|-----|
| 1,00 | 12,00 | 6,00  | 1 | 4 | 5   | 4 | 1 | 3   |
| 1,00 | 12,00 | 6,00  | 1 | 5 | 4   | 3 | 3 | 1   |
| 1,00 | 13,00 | 6,00  | 1 | 5 | 5   | 5 | 1 | 4   |
| 1,00 | 12,00 | 5,00  | 1 | 5 | 3   | 3 | 5 | 2   |
| 1,00 | 12,00 | 5,00  | 1 | 5 | 4   | 5 | 1 | 3   |
| 1,00 | 12,00 | 5,00  | 1 | 5 | 5   | 5 | 1 | 999 |
| 1,00 | 12,00 | 5,00  | 1 | 4 | 5   | 3 | 2 | 2   |
| 1,00 | 12,00 | 5,00  | 1 | 5 | 5   | 5 | 1 | 1   |
| 1,00 | 12,00 | 5,00  | 1 | 3 | 5   | 3 | 5 | 4   |
| 1,00 | 12,00 | 5,00  | 1 | 5 | 5   | 5 | 1 | 1   |
| 1,00 | 12,00 | 5,00  | 1 | 3 | 4   | 2 | 2 | 3   |
| 1,00 | 13,00 | 5,00  | 1 | 4 | 4   | 4 | 2 | 2   |
| 1,00 | 12,00 | 4,00  | 1 | 5 | 5   | 3 | 1 | 1   |
| 1,00 | 12,00 | 3,00  | 1 | 1 | 5   | 3 | 1 | 2   |
| 1,00 | 12,00 | 3,00  | 1 | 4 | 5   | 3 | 1 | 1   |
| 1,00 | 12,00 | 3,00  | 1 | 4 | 3   | 3 | 2 | 2   |
| 1,00 | 12,00 | 3,00  | 1 | 3 | 5   | 2 | 2 | 2   |
| 1,00 | 12,00 | 3,00  | 1 | 3 | 5   | 4 | 1 | 1   |
| 1,00 | 12,00 | 3,00  | 1 | 5 | 3   | 5 | 1 | 2   |
| 1,00 | 13,00 | 3,00  | 1 | 3 | 5   | 3 | 1 | 5   |
| 1,00 | 14,00 | 3,00  | 1 | 5 | 5   | 4 | 2 | 4   |
| 1,00 | 12,00 | 2,00  | 1 | 3 | 4   | 3 | 2 | 1   |
| 1,00 | 12,00 | 2,00  | 1 | 5 | 5   | 4 | 1 | 1   |
| 1,00 | 13,00 | 2,00  | 1 | 3 | 3   | 3 | 2 | 2   |
| 1,00 | 14,00 | 11,00 | 2 | 3 | 4   | 2 | 1 | 5   |
| 1,00 | 14,00 | 8,00  | 2 | 5 | 4   | 3 | 2 | 1   |
| 1,00 | 13,00 | 3,00  | 2 | 3 | 4   | 4 | 2 | 1   |
| 1,00 | 13,00 | 11,00 | 2 | 5 | 5   | 4 | 1 | 1   |
| 1,00 | 13,00 | 11,00 | 2 | 5 | 4   | 2 | 2 | 2   |
| 1,00 | 13,00 | 11,00 | 2 | 3 | 5   | 3 | 1 | 4   |
| 1,00 | 13,00 | 8,00  | 2 | 4 | 5   | 3 | 2 | 1   |
| 1,00 | 15,00 | 8,00  | 2 | 5 | 4   | 5 | 1 | 1   |
| 1,00 | 13,00 | 7,00  | 2 | 4 | 4   | 4 | 5 | 2   |
| 1,00 | 12,00 | 5,00  | 2 | 5 | 4   | 4 | 3 | 1   |
| 1,00 | 13,00 | 5,00  | 2 | 5 | 4   | 3 | 4 | 2   |
| 1,00 | 13,00 | 4,00  | 2 | 3 | 2   | 4 | 2 | 2   |
| 1,00 | 13,00 | 4,00  | 2 | 4 | 4   | 4 | 2 | 1   |
| 1,00 | 13,00 | 11,00 | 2 | 3 | 5   | 4 | 4 | 4   |
| 1,00 | 13,00 | 11,00 | 2 | 4 | 3   | 3 | 2 | 2   |
| 1,00 | 14,00 | 11,00 | 2 | 5 | 3   | 4 | 1 | 5   |
| 1,00 | 13,00 | 8,00  | 2 | 4 | 4   | 4 | 3 | 1   |
| 1,00 | 13,00 | 8,00  | 2 | 3 | 2   | 4 | 1 | 2   |
| 1,00 | 13,00 | 8,00  | 2 | 5 | 4   | 4 | 3 | 1   |
| 1,00 | 13,00 | 8,00  | 2 | 4 | 3   | 3 | 2 | 1   |
| 1,00 | 14,00 | 8,00  | 2 | 4 | 3   | 4 | 3 | 1   |
| 1,00 | 14,00 | 8,00  | 2 | 5 | 5   | 5 | 1 | 1   |
| 1,00 | 14,00 | 8,00  | 2 | 5 | 999 | 2 | 3 | 4   |
| 1,00 | 15,00 | 8,00  | 2 | 5 | 5   | 4 | 1 | 1   |
| 1,00 | 15,00 | 8,00  | 2 | 5 | 5   | 4 | 4 | 2   |
| 1,00 | 13,00 | 7,00  | 2 | 4 | 4   | 3 | 1 | 1   |

|      |       |       |   |     |   |   |     |     |
|------|-------|-------|---|-----|---|---|-----|-----|
| 1,00 | 13,00 | 7,00  | 2 | 4   | 5 | 3 | 1   | 3   |
| 1,00 | 13,00 | 7,00  | 2 | 999 | 4 | 3 | 1   | 1   |
| 1,00 | 13,00 | 7,00  | 2 | 4   | 3 | 4 | 1   | 1   |
| 1,00 | 13,00 | 7,00  | 2 | 5   | 4 | 3 | 2   | 2   |
| 1,00 | 13,00 | 7,00  | 2 | 5   | 5 | 4 | 1   | 2   |
| 1,00 | 13,00 | 6,00  | 2 | 3   | 4 | 4 | 1   | 2   |
| 1,00 | 13,00 | 6,00  | 2 | 4   | 4 | 4 | 2   | 1   |
| 1,00 | 13,00 | 6,00  | 2 | 5   | 4 | 5 | 2   | 999 |
| 1,00 | 13,00 | 5,00  | 2 | 5   | 3 | 5 | 2   | 1   |
| 1,00 | 14,00 | 5,00  | 2 | 5   | 4 | 3 | 1   | 1   |
| 1,00 | 13,00 | 4,00  | 2 | 4   | 5 | 4 | 1   | 1   |
| 1,00 | 13,00 | 4,00  | 2 | 4   | 2 | 5 | 1   | 1   |
| 1,00 | 14,00 | 4,00  | 2 | 3   | 4 | 3 | 5   | 1   |
| 1,00 | 14,00 | 3,00  | 2 | 4   | 3 | 3 | 3   | 1   |
| 1,00 | 13,00 | 2,00  | 2 | 3   | 3 | 3 | 2   | 1   |
| 1,00 | 13,00 | 11,00 | 2 | 5   | 4 | 2 | 2   | 2   |
| 1,00 | 13,00 | 11,00 | 2 | 2   | 2 | 4 | 3   | 1   |
| 1,00 | 13,00 | 11,00 | 2 | 5   | 4 | 5 | 1   | 3   |
| 1,00 | 13,00 | 11,00 | 2 | 4   | 5 | 4 | 3   | 2   |
| 1,00 | 13,00 | 11,00 | 2 | 5   | 4 | 5 | 2   | 5   |
| 1,00 | 13,00 | 11,00 | 2 | 4   | 5 | 3 | 2   | 1   |
| 1,00 | 13,00 | 8,00  | 2 | 5   | 5 | 5 | 1   | 3   |
| 1,00 | 13,00 | 8,00  | 2 | 5   | 5 | 5 | 1   | 1   |
| 1,00 | 14,00 | 8,00  | 2 | 5   | 4 | 4 | 1   | 2   |
| 1,00 | 15,00 | 8,00  | 2 | 5   | 5 | 5 | 1   | 1   |
| 1,00 | 13,00 | 7,00  | 2 | 4   | 3 | 4 | 2   | 1   |
| 1,00 | 13,00 | 7,00  | 2 | 5   | 5 | 4 | 3   | 1   |
| 1,00 | 13,00 | 7,00  | 2 | 5   | 5 | 4 | 2   | 1   |
| 1,00 | 13,00 | 7,00  | 2 | 4   | 5 | 3 | 2   | 1   |
| 1,00 | 13,00 | 7,00  | 2 | 5   | 5 | 5 | 4   | 1   |
| 1,00 | 15,00 | 7,00  | 2 | 5   | 4 | 4 | 3   | 2   |
| 1,00 | 14,00 | 7,00  | 2 | 4   | 4 | 4 | 1   | 1   |
| 1,00 | 13,00 | 6,00  | 2 | 4   | 4 | 4 | 1   | 1   |
| 1,00 | 12,00 | 6,00  | 2 | 3   | 2 | 2 | 3   | 3   |
| 1,00 | 13,00 | 6,00  | 2 | 5   | 5 | 3 | 2   | 3   |
| 1,00 | 13,00 | 6,00  | 2 | 5   | 3 | 3 | 2   | 1   |
| 1,00 | 13,00 | 6,00  | 2 | 5   | 4 | 4 | 1   | 1   |
| 1,00 | 13,00 | 5,00  | 2 | 5   | 3 | 4 | 3   | 1   |
| 1,00 | 13,00 | 5,00  | 2 | 5   | 4 | 5 | 2   | 1   |
| 1,00 | 13,00 | 5,00  | 2 | 5   | 5 | 5 | 1   | 1   |
| 1,00 | 13,00 | 5,00  | 2 | 4   | 3 | 4 | 3   | 2   |
| 1,00 | 13,00 | 5,00  | 2 | 5   | 4 | 5 | 1   | 1   |
| 1,00 | 13,00 | 5,00  | 2 | 4   | 4 | 5 | 1   | 2   |
| 1,00 | 14,00 | 5,00  | 2 | 4   | 5 | 5 | 999 | 1   |
| 1,00 | 14,00 | 4,00  | 2 | 4   | 4 | 3 | 1   | 1   |
| 1,00 | 13,00 | 4,00  | 2 | 4   | 5 | 5 | 2   | 1   |
| 1,00 | 13,00 | 4,00  | 2 | 4   | 3 | 4 | 2   | 3   |
| 1,00 | 13,00 | 4,00  | 2 | 4   | 3 | 3 | 3   | 1   |
| 1,00 | 13,00 | 4,00  | 2 | 5   | 4 | 3 | 3   | 1   |
| 1,00 | 13,00 | 3,00  | 2 | 5   | 4 | 4 | 1   | 3   |

|      |        |       |   |     |     |     |     |     |
|------|--------|-------|---|-----|-----|-----|-----|-----|
| 1,00 | 13,00  | 3,00  | 2 | 5   | 3   | 3   | 3   | 1   |
| 1,00 | 13,00  | 3,00  | 2 | 5   | 5   | 4   | 1   | 1   |
| 1,00 | 13,00  | 3,00  | 2 | 4   | 3   | 3   | 3   | 2   |
| 1,00 | 14,00  | 3,00  | 2 | 5   | 4   | 5   | 2   | 1   |
| 1,00 | 13,00  | 2,00  | 2 | 5   | 4   | 5   | 1   | 1   |
| 1,00 | 13,00  | 2,00  | 2 | 5   | 5   | 5   | 3   | 1   |
| 1,00 | 13,00  | 2,00  | 2 | 5   | 5   | 4   | 3   | 1   |
| 1,00 | 13,00  | 2,00  | 2 | 5   | 5   | 5   | 3   | 1   |
| 1,00 | 13,00  | 11,00 | 2 | 5   | 5   | 5   | 1   | 3   |
| 1,00 | 13,00  | 11,00 | 2 | 5   | 5   | 5   | 2   | 1   |
| 1,00 | 13,00  | 11,00 | 2 | 5   | 4   | 4   | 1   | 3   |
| 1,00 | 13,00  | 11,00 | 2 | 5   | 5   | 4   | 3   | 1   |
| 1,00 | 14,00  | 11,00 | 2 | 3   | 4   | 4   | 1   | 2   |
| 1,00 | 13,00  | 8,00  | 2 | 4   | 5   | 4   | 5   | 1   |
| 1,00 | 14,00  | 8,00  | 2 | 5   | 5   | 3   | 1   | 1   |
| 1,00 | 15,00  | 8,00  | 2 | 3   | 3   | 4   | 2   | 1   |
| 1,00 | 13,00  | 7,00  | 2 | 5   | 4   | 5   | 1   | 1   |
| 1,00 | 13,00  | 7,00  | 2 | 4   | 4   | 3   | 2   | 2   |
| 1,00 | 13,00  | 7,00  | 2 | 5   | 5   | 4   | 2   | 2   |
| 1,00 | 13,00  | 7,00  | 2 | 3   | 2   | 2   | 1   | 4   |
| 1,00 | 14,00  | 7,00  | 2 | 1   | 3   | 2   | 5   | 3   |
| 1,00 | 14,00  | 7,00  | 2 | 5   | 5   | 5   | 3   | 1   |
| 1,00 | 999,00 | 7,00  | 2 | 5   | 5   | 5   | 1   | 1   |
| 1,00 | 13,00  | 6,00  | 2 | 2   | 3   | 3   | 4   | 4   |
| 1,00 | 13,00  | 6,00  | 2 | 5   | 2   | 5   | 2   | 1   |
| 1,00 | 13,00  | 6,00  | 2 | 5   | 5   | 5   | 1   | 1   |
| 1,00 | 13,00  | 6,00  | 2 | 3   | 5   | 3   | 2   | 1   |
| 1,00 | 13,00  | 6,00  | 2 | 5   | 4   | 3   | 1   | 1   |
| 1,00 | 14,00  | 6,00  | 2 | 4   | 5   | 4   | 1   | 3   |
| 1,00 | 14,00  | 6,00  | 2 | 5   | 3   | 3   | 4   | 2   |
| 1,00 | 13,00  | 5,00  | 2 | 4   | 3   | 2   | 2   | 2   |
| 1,00 | 13,00  | 5,00  | 2 | 5   | 3   | 4   | 2   | 2   |
| 1,00 | 13,00  | 5,00  | 2 | 4   | 3   | 4   | 2   | 2   |
| 1,00 | 13,00  | 5,00  | 2 | 4   | 5   | 3   | 3   | 2   |
| 1,00 | 13,00  | 5,00  | 2 | 5   | 5   | 5   | 2   | 4   |
| 1,00 | 13,00  | 4,00  | 2 | 4   | 4   | 4   | 2   | 1   |
| 1,00 | 13,00  | 4,00  | 2 | 4   | 5   | 5   | 2   | 1   |
| 1,00 | 13,00  | 4,00  | 2 | 4   | 3   | 3   | 2   | 2   |
| 1,00 | 13,00  | 4,00  | 2 | 5   | 4   | 4   | 2   | 3   |
| 1,00 | 14,00  | 4,00  | 2 | 5   | 4   | 3   | 1   | 5   |
| 1,00 | 13,00  | 3,00  | 2 | 4   | 5   | 3   | 2   | 1   |
| 1,00 | 13,00  | 3,00  | 2 | 4   | 4   | 4   | 1   | 3   |
| 1,00 | 13,00  | 3,00  | 2 | 5   | 4   | 5   | 1   | 2   |
| 1,00 | 14,00  | 3,00  | 2 | 4   | 5   | 5   | 2   | 1   |
| 1,00 | 14,00  | 3,00  | 2 | 4   | 5   | 3   | 2   | 4   |
| 1,00 | 14,00  | 3,00  | 2 | 4   | 5   | 3   | 1   | 3   |
| 1,00 | 13,00  | 2,00  | 2 | 4   | 4   | 3   | 2   | 1   |
| 1,00 | 13,00  | 2,00  | 2 | 5   | 5   | 4   | 2   | 1   |
| 1,00 | 13,00  | 2,00  | 2 | 3   | 4   | 4   | 2   | 2   |
| 1,00 | 14,00  | 2,00  | 2 | 999 | 999 | 999 | 999 | 999 |

|      |       |       |   |   |   |   |   |   |
|------|-------|-------|---|---|---|---|---|---|
| 1,00 | 14,00 | 11,00 | 3 | 5 | 3 | 3 | 1 | 4 |
| 1,00 | 14,00 | 3,00  | 3 | 4 | 3 | 3 | 2 | 3 |
| 1,00 | 14,00 | 3,00  | 3 | 5 | 4 | 4 | 5 | 1 |
| 1,00 | 14,00 | 11,00 | 3 | 4 | 5 | 4 | 2 | 3 |
| 1,00 | 14,00 | 11,00 | 3 | 4 | 4 | 3 | 2 | 2 |
| 1,00 | 14,00 | 8,00  | 3 | 5 | 5 | 4 | 2 | 1 |
| 1,00 | 14,00 | 8,00  | 3 | 5 | 5 | 4 | 1 | 1 |
| 1,00 | 14,00 | 8,00  | 3 | 5 | 4 | 4 | 3 | 3 |
| 1,00 | 14,00 | 7,00  | 3 | 4 | 4 | 3 | 3 | 2 |
| 1,00 | 14,00 | 6,00  | 3 | 4 | 4 | 4 | 3 | 3 |
| 1,00 | 14,00 | 6,00  | 3 | 4 | 4 | 4 | 1 | 3 |
| 1,00 | 14,00 | 4,00  | 3 | 3 | 3 | 3 | 2 | 2 |
| 1,00 | 14,00 | 3,00  | 3 | 5 | 5 | 4 | 2 | 1 |
| 1,00 | 15,00 | 2,00  | 3 | 5 | 4 | 5 | 4 | 2 |
| 1,00 | 14,00 | 11,00 | 3 | 5 | 4 | 5 | 1 | 2 |
| 1,00 | 14,00 | 11,00 | 3 | 5 | 4 | 4 | 1 | 1 |
| 1,00 | 14,00 | 11,00 | 3 | 5 | 5 | 4 | 1 | 1 |
| 1,00 | 15,00 | 11,00 | 3 | 5 | 4 | 5 | 2 | 1 |
| 1,00 | 14,00 | 11,00 | 3 | 2 | 1 | 2 | 2 | 5 |
| 1,00 | 14,00 | 8,00  | 3 | 5 | 4 | 3 | 3 | 4 |
| 1,00 | 14,00 | 8,00  | 3 | 3 | 2 | 3 | 3 | 4 |
| 1,00 | 14,00 | 7,00  | 3 | 5 | 4 | 5 | 2 | 1 |
| 1,00 | 14,00 | 6,00  | 3 | 5 | 2 | 2 | 4 | 1 |
| 1,00 | 14,00 | 6,00  | 3 | 3 | 5 | 3 | 1 | 1 |
| 1,00 | 14,00 | 6,00  | 3 | 5 | 4 | 3 | 5 | 1 |
| 1,00 | 15,00 | 6,00  | 3 | 3 | 3 | 3 | 2 | 5 |
| 1,00 | 15,00 | 6,00  | 3 | 5 | 4 | 3 | 1 | 1 |
| 1,00 | 14,00 | 5,00  | 3 | 5 | 4 | 3 | 2 | 3 |
| 1,00 | 14,00 | 5,00  | 3 | 5 | 4 | 4 | 2 | 1 |
| 1,00 | 14,00 | 5,00  | 3 | 4 | 2 | 4 | 5 | 3 |
| 1,00 | 15,00 | 4,00  | 3 | 5 | 4 | 5 | 1 | 1 |
| 1,00 | 15,00 | 4,00  | 3 | 4 | 5 | 3 | 3 | 1 |
| 1,00 | 14,00 | 3,00  | 3 | 5 | 5 | 4 | 1 | 2 |
| 1,00 | 14,00 | 3,00  | 3 | 4 | 5 | 4 | 1 | 2 |
| 1,00 | 15,00 | 3,00  | 3 | 3 | 3 | 4 | 1 | 3 |
| 1,00 | 15,00 | 3,00  | 3 | 3 | 5 | 4 | 2 | 1 |
| 1,00 | 15,00 | 3,00  | 3 | 4 | 5 | 4 | 1 | 2 |
| 1,00 | 14,00 | 2,00  | 3 | 1 | 5 | 5 | 1 | 1 |
| 1,00 | 14,00 | 11,00 | 3 | 5 | 4 | 5 | 2 | 1 |
| 1,00 | 14,00 | 11,00 | 3 | 5 | 5 | 4 | 1 | 1 |
| 1,00 | 14,00 | 11,00 | 3 | 5 | 5 | 4 | 1 | 1 |
| 1,00 | 14,00 | 11,00 | 3 | 4 | 5 | 4 | 1 | 1 |
| 1,00 | 14,00 | 11,00 | 3 | 4 | 4 | 3 | 1 | 2 |
| 1,00 | 14,00 | 11,00 | 3 | 3 | 4 | 3 | 1 | 1 |
| 1,00 | 14,00 | 11,00 | 3 | 4 | 4 | 3 | 1 | 2 |
| 1,00 | 14,00 | 11,00 | 3 | 5 | 4 | 4 | 3 | 2 |
| 1,00 | 14,00 | 11,00 | 3 | 5 | 4 | 5 | 1 | 2 |
| 1,00 | 15,00 | 11,00 | 3 | 4 | 3 | 3 | 2 | 2 |
| 1,00 | 15,00 | 11,00 | 3 | 4 | 3 | 4 | 3 | 1 |
| 1,00 | 15,00 | 11,00 | 3 | 5 | 4 | 4 | 2 | 2 |

|      |        |       |   |   |     |   |   |   |
|------|--------|-------|---|---|-----|---|---|---|
| 1,00 | 14,00  | 8,00  | 3 | 5 | 5   | 4 | 2 | 2 |
| 1,00 | 14,00  | 8,00  | 3 | 5 | 5   | 5 | 5 | 1 |
| 1,00 | 14,00  | 8,00  | 3 | 4 | 2   | 3 | 2 | 3 |
| 1,00 | 14,00  | 8,00  | 3 | 3 | 4   | 4 | 3 | 4 |
| 1,00 | 14,00  | 8,00  | 3 | 5 | 5   | 5 | 3 | 3 |
| 1,00 | 14,00  | 8,00  | 3 | 3 | 4   | 5 | 2 | 1 |
| 1,00 | 14,00  | 8,00  | 3 | 5 | 4   | 5 | 1 | 1 |
| 1,00 | 14,00  | 8,00  | 3 | 5 | 5   | 3 | 1 | 2 |
| 1,00 | 15,00  | 8,00  | 3 | 5 | 4   | 4 | 1 | 2 |
| 1,00 | 15,00  | 8,00  | 3 | 5 | 3   | 4 | 3 | 1 |
| 1,00 | 15,00  | 7,00  | 3 | 5 | 4   | 4 | 1 | 3 |
| 1,00 | 15,00  | 7,00  | 3 | 5 | 5   | 5 | 1 | 5 |
| 1,00 | 15,00  | 7,00  | 3 | 4 | 4   | 4 | 4 | 2 |
| 1,00 | 14,00  | 6,00  | 3 | 5 | 5   | 5 | 3 | 1 |
| 1,00 | 14,00  | 6,00  | 3 | 5 | 5   | 4 | 1 | 1 |
| 1,00 | 14,00  | 6,00  | 3 | 5 | 4   | 5 | 2 | 1 |
| 1,00 | 14,00  | 6,00  | 3 | 5 | 5   | 5 | 1 | 1 |
| 1,00 | 14,00  | 5,00  | 3 | 5 | 4   | 5 | 1 | 1 |
| 1,00 | 14,00  | 5,00  | 3 | 3 | 5   | 3 | 2 | 2 |
| 1,00 | 15,00  | 5,00  | 3 | 4 | 3   | 3 | 1 | 2 |
| 1,00 | 15,00  | 5,00  | 3 | 4 | 3   | 3 | 1 | 2 |
| 1,00 | 14,00  | 4,00  | 3 | 5 | 4   | 3 | 1 | 1 |
| 1,00 | 14,00  | 4,00  | 3 | 5 | 4   | 5 | 2 | 1 |
| 1,00 | 14,00  | 4,00  | 3 | 4 | 5   | 3 | 3 | 1 |
| 1,00 | 14,00  | 3,00  | 3 | 5 | 5   | 4 | 2 | 1 |
| 1,00 | 14,00  | 3,00  | 3 | 5 | 4   | 3 | 1 | 2 |
| 1,00 | 14,00  | 3,00  | 3 | 4 | 5   | 2 | 1 | 3 |
| 1,00 | 14,00  | 3,00  | 3 | 2 | 4   | 4 | 3 | 2 |
| 1,00 | 15,00  | 3,00  | 3 | 4 | 5   | 3 | 2 | 2 |
| 1,00 | 15,00  | 3,00  | 3 | 4 | 5   | 3 | 1 | 1 |
| 1,00 | 999,00 | 3,00  | 3 | 3 | 3   | 3 | 2 | 1 |
| 1,00 | 14,00  | 2,00  | 3 | 4 | 999 | 5 | 1 | 1 |
| 1,00 | 14,00  | 2,00  | 3 | 5 | 5   | 4 | 1 | 2 |
| 1,00 | 14,00  | 2,00  | 3 | 4 | 4   | 4 | 1 | 1 |
| 1,00 | 14,00  | 11,00 | 3 | 5 | 5   | 5 | 1 | 1 |
| 1,00 | 14,00  | 11,00 | 3 | 4 | 4   | 3 | 3 | 3 |
| 1,00 | 14,00  | 11,00 | 3 | 5 | 5   | 4 | 2 | 3 |
| 1,00 | 14,00  | 11,00 | 3 | 5 | 5   | 4 | 3 | 1 |
| 1,00 | 14,00  | 11,00 | 3 | 3 | 3   | 3 | 1 | 1 |
| 1,00 | 15,00  | 11,00 | 3 | 5 | 4   | 5 | 2 | 1 |
| 1,00 | 15,00  | 11,00 | 3 | 5 | 4   | 3 | 1 | 2 |
| 1,00 | 14,00  | 8,00  | 3 | 4 | 3   | 5 | 1 | 2 |
| 1,00 | 14,00  | 8,00  | 3 | 4 | 3   | 3 | 2 | 1 |
| 1,00 | 14,00  | 8,00  | 3 | 5 | 4   | 4 | 2 | 1 |
| 1,00 | 14,00  | 8,00  | 3 | 5 | 4   | 5 | 1 | 1 |
| 1,00 | 14,00  | 8,00  | 3 | 3 | 3   | 5 | 1 | 1 |
| 1,00 | 14,00  | 8,00  | 3 | 5 | 5   | 3 | 1 | 1 |
| 1,00 | 15,00  | 8,00  | 3 | 4 | 5   | 3 | 2 | 2 |
| 1,00 | 16,00  | 8,00  | 3 | 5 | 5   | 3 | 3 | 3 |
| 1,00 | 16,00  | 8,00  | 3 | 5 | 5   | 5 | 3 | 2 |

|      |       |       |   |   |   |   |     |   |
|------|-------|-------|---|---|---|---|-----|---|
| 1,00 | 15,00 | 7,00  | 3 | 5 | 3 | 4 | 1   | 2 |
| 1,00 | 14,00 | 6,00  | 3 | 4 | 4 | 2 | 5   | 4 |
| 1,00 | 14,00 | 6,00  | 3 | 3 | 5 | 4 | 2   | 1 |
| 1,00 | 14,00 | 6,00  | 3 | 4 | 4 | 3 | 1   | 3 |
| 1,00 | 14,00 | 6,00  | 3 | 4 | 3 | 3 | 1   | 3 |
| 1,00 | 15,00 | 6,00  | 3 | 4 | 4 | 3 | 1   | 1 |
| 1,00 | 14,00 | 6,00  | 3 | 5 | 4 | 5 | 1   | 1 |
| 1,00 | 15,00 | 6,00  | 3 | 5 | 5 | 5 | 1   | 1 |
| 1,00 | 14,00 | 5,00  | 3 | 4 | 5 | 3 | 3   | 4 |
| 1,00 | 14,00 | 5,00  | 3 | 4 | 3 | 3 | 2   | 3 |
| 1,00 | 15,00 | 5,00  | 3 | 3 | 5 | 2 | 1   | 1 |
| 1,00 | 14,00 | 4,00  | 3 | 4 | 4 | 3 | 999 | 1 |
| 1,00 | 14,00 | 4,00  | 3 | 5 | 5 | 5 | 2   | 1 |
| 1,00 | 14,00 | 3,00  | 3 | 5 | 4 | 2 | 2   | 3 |
| 1,00 | 14,00 | 3,00  | 3 | 4 | 4 | 4 | 2   | 2 |
| 1,00 | 14,00 | 3,00  | 3 | 5 | 4 | 4 | 2   | 3 |
| 1,00 | 14,00 | 3,00  | 3 | 5 | 5 | 5 | 2   | 1 |
| 1,00 | 14,00 | 3,00  | 3 | 4 | 3 | 5 | 2   | 1 |
| 1,00 | 14,00 | 3,00  | 3 | 5 | 4 | 5 | 1   | 1 |
| 1,00 | 14,00 | 3,00  | 3 | 4 | 5 | 4 | 3   | 2 |
| 1,00 | 14,00 | 3,00  | 3 | 5 | 3 | 3 | 2   | 1 |
| 1,00 | 14,00 | 3,00  | 3 | 4 | 5 | 3 | 3   | 1 |
| 1,00 | 14,00 | 3,00  | 3 | 4 | 4 | 4 | 2   | 3 |
| 1,00 | 14,00 | 3,00  | 3 | 5 | 3 | 5 | 2   | 1 |
| 1,00 | 14,00 | 3,00  | 3 | 5 | 3 | 3 | 1   | 1 |
| 1,00 | 15,00 | 3,00  | 3 | 5 | 4 | 4 | 2   | 1 |
| 1,00 | 14,00 | 2,00  | 3 | 4 | 5 | 4 | 2   | 1 |
| 1,00 | 14,00 | 2,00  | 3 | 4 | 3 | 4 | 4   | 1 |
| 1,00 | 14,00 | 2,00  | 3 | 5 | 3 | 3 | 4   | 4 |
| 1,00 | 15,00 | 6,00  | 4 | 5 | 3 | 4 | 2   | 1 |
| 1,00 | 15,00 | 2,00  | 4 | 5 | 4 | 3 | 4   | 2 |
| 1,00 | 15,00 | 11,00 | 4 | 3 | 2 | 3 | 4   | 3 |
| 1,00 | 15,00 | 11,00 | 4 | 5 | 3 | 4 | 2   | 1 |
| 1,00 | 16,00 | 11,00 | 4 | 5 | 5 | 4 | 1   | 3 |
| 1,00 | 15,00 | 6,00  | 4 | 5 | 4 | 3 | 2   | 1 |
| 1,00 | 16,00 | 4,00  | 4 | 4 | 4 | 4 | 5   | 3 |
| 1,00 | 15,00 | 2,00  | 4 | 4 | 4 | 3 | 5   | 3 |
| 1,00 | 15,00 | 2,00  | 4 | 5 | 4 | 3 | 3   | 3 |
| 1,00 | 15,00 | 2,00  | 4 | 5 | 4 | 3 | 1   | 3 |
| 1,00 | 15,00 | 11,00 | 4 | 4 | 5 | 4 | 2   | 3 |
| 1,00 | 15,00 | 8,00  | 4 | 5 | 5 | 5 | 2   | 1 |
| 1,00 | 16,00 | 8,00  | 4 | 4 | 5 | 5 | 4   | 5 |
| 1,00 | 15,00 | 7,00  | 4 | 4 | 4 | 4 | 2   | 1 |
| 1,00 | 15,00 | 7,00  | 4 | 5 | 5 | 4 | 1   | 1 |
| 1,00 | 15,00 | 7,00  | 4 | 4 | 3 | 4 | 4   | 3 |
| 1,00 | 15,00 | 7,00  | 4 | 4 | 2 | 2 | 5   | 4 |
| 1,00 | 16,00 | 7,00  | 4 | 4 | 4 | 3 | 3   | 3 |
| 1,00 | 15,00 | 6,00  | 4 | 4 | 4 | 3 | 2   | 3 |
| 1,00 | 15,00 | 6,00  | 4 | 5 | 5 | 4 | 2   | 1 |
| 1,00 | 16,00 | 6,00  | 4 | 4 | 2 | 2 | 3   | 3 |



|      |       |       |   |   |   |   |   |   |
|------|-------|-------|---|---|---|---|---|---|
| 1,00 | 16,00 | 4,00  | 4 | 3 | 5 | 3 | 3 | 4 |
| 1,00 | 15,00 | 3,00  | 4 | 5 | 4 | 4 | 2 | 2 |
| 1,00 | 15,00 | 3,00  | 4 | 3 | 4 | 5 | 2 | 1 |
| 1,00 | 15,00 | 3,00  | 4 | 5 | 3 | 3 | 2 | 3 |
| 1,00 | 15,00 | 3,00  | 4 | 5 | 4 | 4 | 1 | 2 |
| 1,00 | 15,00 | 2,00  | 4 | 4 | 3 | 3 | 2 | 3 |
| 1,00 | 15,00 | 11,00 | 4 | 5 | 5 | 4 | 2 | 1 |
| 1,00 | 15,00 | 11,00 | 4 | 5 | 4 | 5 | 2 | 1 |
| 1,00 | 15,00 | 11,00 | 4 | 5 | 5 | 4 | 4 | 4 |
| 1,00 | 15,00 | 11,00 | 4 | 5 | 3 | 3 | 2 | 4 |
| 1,00 | 15,00 | 11,00 | 4 | 5 | 4 | 3 | 2 | 1 |
| 1,00 | 16,00 | 11,00 | 4 | 5 | 3 | 3 | 3 | 3 |
| 1,00 | 16,00 | 11,00 | 4 | 5 | 5 | 5 | 1 | 1 |
| 1,00 | 15,00 | 8,00  | 4 | 5 | 4 | 4 | 3 | 2 |
| 1,00 | 16,00 | 8,00  | 4 | 5 | 4 | 4 | 2 | 1 |
| 1,00 | 15,00 | 7,00  | 4 | 5 | 4 | 4 | 2 | 2 |
| 1,00 | 15,00 | 7,00  | 4 | 5 | 4 | 3 | 1 | 3 |
| 1,00 | 15,00 | 7,00  | 4 | 5 | 3 | 4 | 2 | 3 |
| 1,00 | 15,00 | 6,00  | 4 | 5 | 5 | 5 | 3 | 1 |
| 1,00 | 15,00 | 6,00  | 4 | 5 | 1 | 3 | 5 | 3 |
| 1,00 | 15,00 | 4,00  | 4 | 5 | 5 | 4 | 1 | 3 |
| 1,00 | 15,00 | 4,00  | 4 | 5 | 4 | 4 | 2 | 3 |
| 1,00 | 16,00 | 4,00  | 4 | 4 | 5 | 3 | 3 | 2 |
| 1,00 | 15,00 | 3,00  | 4 | 4 | 4 | 3 | 2 | 1 |
| 1,00 | 15,00 | 3,00  | 4 | 5 | 4 | 4 | 2 | 2 |
| 1,00 | 15,00 | 3,00  | 4 | 4 | 4 | 3 | 2 | 3 |
| 1,00 | 15,00 | 3,00  | 4 | 5 | 4 | 4 | 1 | 1 |
| 1,00 | 15,00 | 3,00  | 4 | 5 | 4 | 4 | 2 | 3 |
| 1,00 | 15,00 | 3,00  | 4 | 5 | 3 | 4 | 2 | 1 |
| 1,00 | 15,00 | 2,00  | 4 | 5 | 5 | 3 | 1 | 2 |
| 1,00 | 15,00 | 2,00  | 4 | 4 | 4 | 4 | 1 | 2 |
| 1,00 | 15,00 | 2,00  | 4 | 5 | 5 | 3 | 2 | 1 |
| 1,00 | 15,00 | 11,00 | 4 | 4 | 4 | 5 | 1 | 1 |
| 1,00 | 15,00 | 11,00 | 4 | 5 | 5 | 4 | 3 | 2 |
| 1,00 | 15,00 | 11,00 | 4 | 5 | 5 | 3 | 1 | 1 |
| 1,00 | 15,00 | 11,00 | 4 | 4 | 3 | 3 | 2 | 2 |
| 1,00 | 16,00 | 11,00 | 4 | 5 | 5 | 5 | 3 | 4 |
| 1,00 | 16,00 | 11,00 | 4 | 4 | 4 | 3 | 3 | 2 |
| 1,00 | 16,00 | 11,00 | 4 | 4 | 4 | 3 | 2 | 4 |
| 1,00 | 15,00 | 8,00  | 4 | 5 | 4 | 4 | 2 | 1 |
| 1,00 | 15,00 | 8,00  | 4 | 5 | 4 | 5 | 2 | 3 |
| 1,00 | 15,00 | 8,00  | 4 | 4 | 4 | 4 | 1 | 1 |
| 1,00 | 15,00 | 7,00  | 4 | 4 | 3 | 3 | 2 | 2 |
| 1,00 | 15,00 | 7,00  | 4 | 4 | 4 | 5 | 2 | 2 |
| 1,00 | 15,00 | 7,00  | 4 | 3 | 4 | 4 | 2 | 3 |
| 1,00 | 15,00 | 7,00  | 4 | 3 | 4 | 3 | 2 | 3 |
| 1,00 | 16,00 | 7,00  | 4 | 4 | 5 | 5 | 1 | 3 |
| 1,00 | 16,00 | 6,00  | 4 | 5 | 5 | 4 | 2 | 2 |
| 1,00 | 15,00 | 4,00  | 4 | 5 | 5 | 4 | 2 | 3 |
| 1,00 | 16,00 | 4,00  | 4 | 5 | 5 | 5 | 1 | 1 |

|      |       |       |   |   |   |     |   |   |
|------|-------|-------|---|---|---|-----|---|---|
| 1,00 | 16,00 | 4,00  | 4 | 3 | 5 | 5   | 2 | 1 |
| 1,00 | 15,00 | 3,00  | 4 | 5 | 4 | 4   | 3 | 2 |
| 1,00 | 15,00 | 3,00  | 4 | 4 | 4 | 3   | 3 | 3 |
| 1,00 | 15,00 | 3,00  | 4 | 5 | 4 | 4   | 2 | 1 |
| 1,00 | 15,00 | 3,00  | 4 | 4 | 3 | 4   | 4 | 3 |
| 1,00 | 15,00 | 3,00  | 4 | 4 | 5 | 4   | 1 | 2 |
| 1,00 | 15,00 | 2,00  | 4 | 5 | 5 | 5   | 2 | 1 |
| 1,00 | 16,00 | 2,00  | 4 | 4 | 3 | 4   | 2 | 2 |
| 1,00 | 16,00 | 2,00  | 4 | 4 | 3 | 5   | 3 | 1 |
| 2,00 | 12,00 | 3,00  | 1 | 5 | 3 | 2   | 4 | 1 |
| 2,00 | 12,00 | 11,00 | 1 | 4 | 4 | 4   | 2 | 5 |
| 2,00 | 12,00 | 8,00  | 1 | 3 | 3 | 999 | 4 | 1 |
| 2,00 | 14,00 | 8,00  | 1 | 4 | 4 | 3   | 3 | 2 |
| 2,00 | 12,00 | 6,00  | 1 | 3 | 3 | 2   | 2 | 1 |
| 2,00 | 12,00 | 6,00  | 1 | 3 | 4 | 5   | 2 | 3 |
| 2,00 | 12,00 | 6,00  | 1 | 4 | 3 | 5   | 4 | 1 |
| 2,00 | 12,00 | 11,00 | 1 | 3 | 3 | 4   | 1 | 1 |
| 2,00 | 12,00 | 11,00 | 1 | 3 | 4 | 4   | 2 | 2 |
| 2,00 | 12,00 | 11,00 | 1 | 4 | 5 | 3   | 1 | 2 |
| 2,00 | 12,00 | 11,00 | 1 | 4 | 3 | 3   | 3 | 3 |
| 2,00 | 12,00 | 11,00 | 1 | 5 | 4 | 4   | 2 | 3 |
| 2,00 | 13,00 | 11,00 | 1 | 3 | 4 | 3   | 2 | 1 |
| 2,00 | 12,00 | 8,00  | 1 | 2 | 2 | 4   | 1 | 1 |
| 2,00 | 12,00 | 7,00  | 1 | 4 | 3 | 4   | 2 | 1 |
| 2,00 | 12,00 | 6,00  | 1 | 1 | 2 | 1   | 1 | 1 |
| 2,00 | 12,00 | 6,00  | 1 | 5 | 3 | 4   | 2 | 2 |
| 2,00 | 12,00 | 6,00  | 1 | 3 | 3 | 3   | 4 | 2 |
| 2,00 | 12,00 | 6,00  | 1 | 3 | 2 | 2   | 4 | 4 |
| 2,00 | 12,00 | 6,00  | 1 | 2 | 1 | 2   | 1 | 1 |
| 2,00 | 13,00 | 6,00  | 1 | 5 | 4 | 3   | 1 | 1 |
| 2,00 | 12,00 | 5,00  | 1 | 3 | 4 | 3   | 1 | 1 |
| 2,00 | 13,00 | 4,00  | 1 | 4 | 2 | 2   | 4 | 5 |
| 2,00 | 13,00 | 4,00  | 1 | 3 | 5 | 4   | 4 | 1 |
| 2,00 | 12,00 | 3,00  | 1 | 4 | 5 | 3   | 5 | 2 |
| 2,00 | 12,00 | 3,00  | 1 | 3 | 4 | 3   | 1 | 3 |
| 2,00 | 12,00 | 3,00  | 1 | 5 | 5 | 4   | 3 | 2 |
| 2,00 | 12,00 | 3,00  | 1 | 4 | 3 | 3   | 2 | 2 |
| 2,00 | 12,00 | 2,00  | 1 | 4 | 4 | 3   | 2 | 1 |
| 2,00 | 12,00 | 11,00 | 1 | 3 | 4 | 2   | 1 | 3 |
| 2,00 | 12,00 | 11,00 | 1 | 3 | 5 | 3   | 1 | 2 |
| 2,00 | 12,00 | 11,00 | 1 | 4 | 3 | 2   | 5 | 3 |
| 2,00 | 12,00 | 11,00 | 1 | 5 | 4 | 3   | 3 | 3 |
| 2,00 | 12,00 | 11,00 | 1 | 4 | 3 | 4   | 2 | 1 |
| 2,00 | 12,00 | 11,00 | 1 | 3 | 4 | 4   | 1 | 5 |
| 2,00 | 13,00 | 8,00  | 1 | 5 | 5 | 4   | 2 | 1 |
| 2,00 | 12,00 | 8,00  | 1 | 5 | 1 | 4   | 3 | 5 |
| 2,00 | 12,00 | 8,00  | 1 | 2 | 4 | 1   | 1 | 5 |
| 2,00 | 13,00 | 8,00  | 1 | 2 | 3 | 2   | 1 | 1 |
| 2,00 | 14,00 | 8,00  | 1 | 4 | 5 | 4   | 2 | 3 |
| 2,00 | 12,00 | 6,00  | 1 | 5 | 3 | 1   | 1 | 1 |

|      |        |       |   |   |     |   |   |   |
|------|--------|-------|---|---|-----|---|---|---|
| 2,00 | 12,00  | 6,00  | 1 | 4 | 3   | 3 | 2 | 1 |
| 2,00 | 12,00  | 6,00  | 1 | 4 | 3   | 3 | 2 | 1 |
| 2,00 | 12,00  | 6,00  | 1 | 4 | 2   | 4 | 2 | 3 |
| 2,00 | 12,00  | 6,00  | 1 | 4 | 3   | 3 | 4 | 4 |
| 2,00 | 12,00  | 5,00  | 1 | 2 | 3   | 3 | 2 | 1 |
| 2,00 | 12,00  | 4,00  | 1 | 1 | 2   | 2 | 4 | 5 |
| 2,00 | 13,00  | 4,00  | 1 | 3 | 1   | 2 | 5 | 1 |
| 2,00 | 12,00  | 3,00  | 1 | 4 | 5   | 5 | 2 | 1 |
| 2,00 | 12,00  | 3,00  | 1 | 5 | 3   | 4 | 2 | 1 |
| 2,00 | 13,00  | 3,00  | 1 | 4 | 2   | 3 | 1 | 2 |
| 2,00 | 12,00  | 2,00  | 1 | 4 | 3   | 2 | 3 | 2 |
| 2,00 | 12,00  | 2,00  | 1 | 5 | 4   | 4 | 3 | 1 |
| 2,00 | 12,00  | 11,00 | 1 | 5 | 5   | 2 | 4 | 5 |
| 2,00 | 12,00  | 11,00 | 1 | 3 | 5   | 3 | 1 | 1 |
| 2,00 | 12,00  | 11,00 | 1 | 3 | 4   | 4 | 3 | 5 |
| 2,00 | 12,00  | 11,00 | 1 | 5 | 4   | 5 | 2 | 1 |
| 2,00 | 12,00  | 11,00 | 1 | 5 | 5   | 4 | 1 | 1 |
| 2,00 | 12,00  | 11,00 | 1 | 5 | 3   | 4 | 3 | 5 |
| 2,00 | 12,00  | 11,00 | 1 | 5 | 4   | 4 | 1 | 2 |
| 2,00 | 12,00  | 11,00 | 1 | 4 | 5   | 3 | 2 | 4 |
| 2,00 | 13,00  | 11,00 | 1 | 4 | 5   | 4 | 1 | 2 |
| 2,00 | 13,00  | 11,00 | 1 | 4 | 3   | 5 | 1 | 2 |
| 2,00 | 12,00  | 8,00  | 1 | 4 | 5   | 3 | 1 | 1 |
| 2,00 | 12,00  | 8,00  | 1 | 3 | 4   | 4 | 3 | 1 |
| 2,00 | 12,00  | 8,00  | 1 | 5 | 5   | 5 | 5 | 1 |
| 2,00 | 12,00  | 8,00  | 1 | 5 | 5   | 5 | 1 | 1 |
| 2,00 | 14,00  | 8,00  | 1 | 5 | 3   | 3 | 1 | 1 |
| 2,00 | 14,00  | 8,00  | 1 | 3 | 5   | 4 | 4 | 1 |
| 2,00 | 12,00  | 7,00  | 1 | 4 | 4   | 4 | 1 | 1 |
| 2,00 | 12,00  | 7,00  | 1 | 4 | 5   | 5 | 2 | 1 |
| 2,00 | 12,00  | 7,00  | 1 | 3 | 4   | 5 | 1 | 1 |
| 2,00 | 12,00  | 7,00  | 1 | 3 | 5   | 4 | 2 | 1 |
| 2,00 | 13,00  | 7,00  | 1 | 3 | 4   | 4 | 1 | 1 |
| 2,00 | 12,00  | 6,00  | 1 | 3 | 4   | 3 | 3 | 1 |
| 2,00 | 12,00  | 6,00  | 1 | 5 | 5   | 4 | 5 | 1 |
| 2,00 | 14,00  | 6,00  | 1 | 3 | 4   | 2 | 2 | 1 |
| 2,00 | 999,00 | 5,00  | 1 | 4 | 3   | 1 | 2 | 3 |
| 2,00 | 12,00  | 4,00  | 1 | 3 | 4   | 5 | 1 | 4 |
| 2,00 | 12,00  | 4,00  | 1 | 5 | 5   | 3 | 2 | 2 |
| 2,00 | 12,00  | 4,00  | 1 | 1 | 1   | 5 | 1 | 4 |
| 2,00 | 12,00  | 4,00  | 1 | 5 | 999 | 4 | 1 | 1 |
| 2,00 | 13,00  | 4,00  | 1 | 3 | 4   | 2 | 3 | 5 |
| 2,00 | 12,00  | 3,00  | 1 | 4 | 5   | 4 | 1 | 5 |
| 2,00 | 12,00  | 3,00  | 1 | 3 | 3   | 4 | 2 | 3 |
| 2,00 | 12,00  | 3,00  | 1 | 4 | 3   | 3 | 2 | 2 |
| 2,00 | 12,00  | 3,00  | 1 | 4 | 5   | 3 | 2 | 1 |
| 2,00 | 12,00  | 3,00  | 1 | 3 | 3   | 2 | 3 | 1 |
| 2,00 | 12,00  | 3,00  | 1 | 4 | 3   | 4 | 2 | 1 |
| 2,00 | 12,00  | 3,00  | 1 | 5 | 3   | 3 | 4 | 3 |
| 2,00 | 12,00  | 2,00  | 1 | 5 | 3   | 5 | 1 | 1 |

|      |        |       |   |   |   |     |   |   |
|------|--------|-------|---|---|---|-----|---|---|
| 2,00 | 12,00  | 2,00  | 1 | 5 | 5 | 1   | 4 | 5 |
| 2,00 | 12,00  | 2,00  | 1 | 5 | 4 | 4   | 3 | 1 |
| 2,00 | 12,00  | 2,00  | 1 | 4 | 3 | 3   | 2 | 2 |
| 2,00 | 15,00  | 8,00  | 2 | 5 | 4 | 5   | 1 | 1 |
| 2,00 | 14,00  | 11,00 | 2 | 3 | 3 | 2   | 2 | 1 |
| 2,00 | 13,00  | 8,00  | 2 | 3 | 4 | 3   | 2 | 1 |
| 2,00 | 14,00  | 8,00  | 2 | 3 | 3 | 3   | 5 | 5 |
| 2,00 | 13,00  | 3,00  | 2 | 4 | 3 | 3   | 1 | 1 |
| 2,00 | 13,00  | 11,00 | 2 | 4 | 3 | 3   | 2 | 2 |
| 2,00 | 13,00  | 11,00 | 2 | 5 | 4 | 3   | 1 | 1 |
| 2,00 | 13,00  | 8,00  | 2 | 3 | 4 | 3   | 1 | 3 |
| 2,00 | 13,00  | 8,00  | 2 | 5 | 4 | 4   | 4 | 1 |
| 2,00 | 999,00 | 8,00  | 2 | 3 | 3 | 3   | 3 | 3 |
| 2,00 | 14,00  | 6,00  | 2 | 4 | 3 | 2   | 4 | 1 |
| 2,00 | 13,00  | 11,00 | 2 | 4 | 4 | 5   | 1 | 1 |
| 2,00 | 13,00  | 11,00 | 2 | 5 | 4 | 5   | 1 | 1 |
| 2,00 | 13,00  | 11,00 | 2 | 4 | 5 | 4   | 3 | 2 |
| 2,00 | 13,00  | 8,00  | 2 | 4 | 4 | 3   | 2 | 5 |
| 2,00 | 13,00  | 8,00  | 2 | 4 | 3 | 3   | 2 | 1 |
| 2,00 | 14,00  | 8,00  | 2 | 4 | 5 | 4   | 2 | 4 |
| 2,00 | 14,00  | 8,00  | 2 | 2 | 3 | 2   | 1 | 1 |
| 2,00 | 15,00  | 8,00  | 2 | 3 | 4 | 4   | 3 | 5 |
| 2,00 | 13,00  | 7,00  | 2 | 3 | 2 | 4   | 1 | 2 |
| 2,00 | 13,00  | 7,00  | 2 | 2 | 4 | 999 | 3 | 1 |
| 2,00 | 13,00  | 7,00  | 2 | 5 | 4 | 3   | 3 | 2 |
| 2,00 | 13,00  | 6,00  | 2 | 4 | 4 | 4   | 3 | 2 |
| 2,00 | 14,00  | 6,00  | 2 | 4 | 3 | 4   | 2 | 4 |
| 2,00 | 14,00  | 5,00  | 2 | 3 | 4 | 3   | 1 | 2 |
| 2,00 | 14,00  | 4,00  | 2 | 4 | 3 | 3   | 2 | 2 |
| 2,00 | 14,00  | 4,00  | 2 | 4 | 4 | 3   | 2 | 2 |
| 2,00 | 14,00  | 4,00  | 2 | 5 | 4 | 3   | 1 | 1 |
| 2,00 | 13,00  | 3,00  | 2 | 3 | 5 | 4   | 2 | 1 |
| 2,00 | 13,00  | 3,00  | 2 | 4 | 3 | 4   | 2 | 1 |
| 2,00 | 13,00  | 2,00  | 2 | 5 | 5 | 3   | 2 | 2 |
| 2,00 | 13,00  | 2,00  | 2 | 4 | 3 | 3   | 1 | 2 |
| 2,00 | 13,00  | 2,00  | 2 | 5 | 4 | 5   | 2 | 1 |
| 2,00 | 13,00  | 11,00 | 2 | 3 | 1 | 4   | 2 | 1 |
| 2,00 | 13,00  | 11,00 | 2 | 4 | 3 | 5   | 1 | 1 |
| 2,00 | 13,00  | 11,00 | 2 | 3 | 4 | 2   | 1 | 4 |
| 2,00 | 13,00  | 11,00 | 2 | 4 | 3 | 3   | 3 | 5 |
| 2,00 | 13,00  | 11,00 | 2 | 3 | 3 | 2   | 1 | 2 |
| 2,00 | 13,00  | 11,00 | 2 | 4 | 4 | 3   | 1 | 2 |
| 2,00 | 13,00  | 11,00 | 2 | 4 | 3 | 5   | 1 | 1 |
| 2,00 | 13,00  | 11,00 | 2 | 4 | 3 | 3   | 1 | 2 |
| 2,00 | 14,00  | 11,00 | 2 | 4 | 5 | 3   | 1 | 1 |
| 2,00 | 14,00  | 11,00 | 2 | 5 | 2 | 1   | 3 | 3 |
| 2,00 | 13,00  | 8,00  | 2 | 4 | 4 | 3   | 2 | 4 |
| 2,00 | 13,00  | 8,00  | 2 | 3 | 4 | 3   | 1 | 1 |
| 2,00 | 13,00  | 8,00  | 2 | 4 | 4 | 3   | 3 | 2 |
| 2,00 | 13,00  | 8,00  | 2 | 4 | 3 | 4   | 1 | 1 |

|      |       |       |   |   |   |     |     |   |
|------|-------|-------|---|---|---|-----|-----|---|
| 2,00 | 13,00 | 8,00  | 2 | 5 | 4 | 4   | 2   | 1 |
| 2,00 | 13,00 | 8,00  | 2 | 4 | 3 | 3   | 1   | 1 |
| 2,00 | 14,00 | 8,00  | 2 | 4 | 3 | 5   | 3   | 1 |
| 2,00 | 14,00 | 8,00  | 2 | 4 | 3 | 3   | 2   | 3 |
| 2,00 | 14,00 | 8,00  | 2 | 3 | 3 | 3   | 3   | 3 |
| 2,00 | 13,00 | 7,00  | 2 | 5 | 5 | 5   | 1   | 5 |
| 2,00 | 13,00 | 7,00  | 2 | 1 | 2 | 1   | 2   | 2 |
| 2,00 | 13,00 | 7,00  | 2 | 5 | 5 | 3   | 2   | 1 |
| 2,00 | 13,00 | 7,00  | 2 | 4 | 4 | 4   | 2   | 1 |
| 2,00 | 14,00 | 7,00  | 2 | 4 | 1 | 2   | 5   | 1 |
| 2,00 | 14,00 | 7,00  | 2 | 3 | 4 | 4   | 1   | 1 |
| 2,00 | 14,00 | 7,00  | 2 | 3 | 4 | 5   | 1   | 5 |
| 2,00 | 14,00 | 7,00  | 2 | 2 | 3 | 3   | 2   | 3 |
| 2,00 | 15,00 | 7,00  | 2 | 4 | 3 | 4   | 2   | 1 |
| 2,00 | 13,00 | 6,00  | 2 | 3 | 3 | 3   | 3   | 3 |
| 2,00 | 13,00 | 6,00  | 2 | 4 | 3 | 999 | 999 | 1 |
| 2,00 | 13,00 | 6,00  | 2 | 3 | 3 | 4   | 3   | 2 |
| 2,00 | 14,00 | 6,00  | 2 | 4 | 4 | 4   | 2   | 1 |
| 2,00 | 14,00 | 6,00  | 2 | 3 | 3 | 2   | 3   | 1 |
| 2,00 | 14,00 | 6,00  | 2 | 5 | 5 | 5   | 1   | 5 |
| 2,00 | 14,00 | 6,00  | 2 | 4 | 5 | 5   | 3   | 1 |
| 2,00 | 13,00 | 5,00  | 2 | 3 | 3 | 4   | 2   | 1 |
| 2,00 | 14,00 | 5,00  | 2 | 1 | 2 | 1   | 1   | 3 |
| 2,00 | 14,00 | 5,00  | 2 | 2 | 3 | 4   | 1   | 3 |
| 2,00 | 15,00 | 5,00  | 2 | 5 | 5 | 5   | 3   | 2 |
| 2,00 | 13,00 | 4,00  | 2 | 4 | 4 | 3   | 2   | 4 |
| 2,00 | 14,00 | 4,00  | 2 | 4 | 4 | 3   | 2   | 1 |
| 2,00 | 14,00 | 4,00  | 2 | 4 | 3 | 4   | 2   | 1 |
| 2,00 | 13,00 | 3,00  | 2 | 4 | 5 | 4   | 2   | 3 |
| 2,00 | 13,00 | 3,00  | 2 | 4 | 4 | 3   | 2   | 1 |
| 2,00 | 13,00 | 3,00  | 2 | 3 | 5 | 4   | 2   | 1 |
| 2,00 | 13,00 | 3,00  | 2 | 3 | 5 | 4   | 2   | 2 |
| 2,00 | 14,00 | 3,00  | 2 | 4 | 4 | 4   | 2   | 2 |
| 2,00 | 14,00 | 3,00  | 2 | 2 | 3 | 4   | 1   | 4 |
| 2,00 | 14,00 | 3,00  | 2 | 4 | 4 | 5   | 2   | 1 |
| 2,00 | 13,00 | 2,00  | 2 | 4 | 3 | 3   | 2   | 1 |
| 2,00 | 14,00 | 2,00  | 2 | 5 | 4 | 3   | 3   | 1 |
| 2,00 | 14,00 | 2,00  | 2 | 5 | 4 | 5   | 2   | 1 |
| 2,00 | 14,00 | 2,00  | 2 | 3 | 3 | 2   | 1   | 1 |
| 2,00 | 15,00 | 2,00  | 2 | 5 | 3 | 2   | 1   | 3 |
| 2,00 | 14,00 | 8,00  | 3 | 2 | 3 | 3   | 4   | 2 |
| 2,00 | 14,00 | 2,00  | 3 | 4 | 3 | 3   | 2   | 2 |
| 2,00 | 14,00 | 8,00  | 3 | 5 | 4 | 4   | 3   | 1 |
| 2,00 | 14,00 | 11,00 | 3 | 5 | 5 | 5   | 1   | 3 |
| 2,00 | 15,00 | 11,00 | 3 | 5 | 4 | 4   | 2   | 1 |
| 2,00 | 15,00 | 11,00 | 3 | 5 | 3 | 4   | 2   | 2 |
| 2,00 | 14,00 | 8,00  | 3 | 3 | 5 | 4   | 2   | 1 |
| 2,00 | 15,00 | 8,00  | 3 | 5 | 4 | 3   | 2   | 1 |
| 2,00 | 14,00 | 7,00  | 3 | 3 | 4 | 3   | 3   | 2 |
| 2,00 | 14,00 | 6,00  | 3 | 3 | 4 | 3   | 4   | 3 |

|      |       |       |   |   |   |   |     |   |
|------|-------|-------|---|---|---|---|-----|---|
| 2,00 | 15,00 | 6,00  | 3 | 3 | 3 | 2 | 4   | 3 |
| 2,00 | 15,00 | 6,00  | 3 | 3 | 4 | 3 | 2   | 1 |
| 2,00 | 15,00 | 6,00  | 3 | 3 | 3 | 2 | 1   | 1 |
| 2,00 | 15,00 | 6,00  | 3 | 4 | 3 | 3 | 2   | 3 |
| 2,00 | 15,00 | 6,00  | 3 | 2 | 3 | 2 | 2   | 1 |
| 2,00 | 14,00 | 4,00  | 3 | 3 | 3 | 2 | 999 | 2 |
| 2,00 | 15,00 | 2,00  | 3 | 4 | 4 | 3 | 1   | 1 |
| 2,00 | 14,00 | 11,00 | 3 | 3 | 3 | 3 | 3   | 1 |
| 2,00 | 14,00 | 11,00 | 3 | 5 | 4 | 3 | 1   | 3 |
| 2,00 | 14,00 | 11,00 | 3 | 4 | 3 | 3 | 2   | 2 |
| 2,00 | 14,00 | 11,00 | 3 | 4 | 3 | 4 | 1   | 3 |
| 2,00 | 14,00 | 11,00 | 3 | 4 | 2 | 5 | 1   | 1 |
| 2,00 | 14,00 | 11,00 | 3 | 3 | 2 | 4 | 2   | 1 |
| 2,00 | 14,00 | 11,00 | 3 | 5 | 4 | 3 | 2   | 4 |
| 2,00 | 14,00 | 11,00 | 3 | 4 | 3 | 5 | 2   | 1 |
| 2,00 | 15,00 | 11,00 | 3 | 5 | 3 | 3 | 2   | 3 |
| 2,00 | 14,00 | 8,00  | 3 | 5 | 3 | 4 | 4   | 4 |
| 2,00 | 14,00 | 8,00  | 3 | 2 | 3 | 3 | 2   | 1 |
| 2,00 | 15,00 | 8,00  | 3 | 4 | 3 | 4 | 3   | 3 |
| 2,00 | 15,00 | 8,00  | 3 | 5 | 5 | 4 | 1   | 4 |
| 2,00 | 15,00 | 8,00  | 3 | 5 | 5 | 5 | 1   | 1 |
| 2,00 | 15,00 | 8,00  | 3 | 5 | 5 | 5 | 1   | 1 |
| 2,00 | 14,00 | 7,00  | 3 | 5 | 4 | 3 | 2   | 1 |
| 2,00 | 14,00 | 7,00  | 3 | 5 | 4 | 3 | 4   | 2 |
| 2,00 | 14,00 | 6,00  | 3 | 2 | 2 | 2 | 3   | 2 |
| 2,00 | 15,00 | 6,00  | 3 | 3 | 5 | 4 | 3   | 1 |
| 2,00 | 14,00 | 5,00  | 3 | 5 | 3 | 4 | 1   | 1 |
| 2,00 | 14,00 | 5,00  | 3 | 3 | 3 | 2 | 2   | 4 |
| 2,00 | 14,00 | 5,00  | 3 | 4 | 2 | 3 | 2   | 1 |
| 2,00 | 14,00 | 3,00  | 3 | 5 | 3 | 3 | 3   | 3 |
| 2,00 | 14,00 | 3,00  | 3 | 3 | 2 | 3 | 2   | 3 |
| 2,00 | 15,00 | 3,00  | 3 | 4 | 5 | 4 | 3   | 3 |
| 2,00 | 15,00 | 3,00  | 3 | 4 | 2 | 4 | 3   | 1 |
| 2,00 | 15,00 | 3,00  | 3 | 3 | 4 | 4 | 2   | 2 |
| 2,00 | 14,00 | 2,00  | 3 | 4 | 5 | 3 | 2   | 1 |
| 2,00 | 14,00 | 11,00 | 3 | 4 | 3 | 4 | 2   | 2 |
| 2,00 | 14,00 | 11,00 | 3 | 4 | 5 | 3 | 2   | 5 |
| 2,00 | 14,00 | 11,00 | 3 | 3 | 3 | 4 | 3   | 2 |
| 2,00 | 14,00 | 11,00 | 3 | 4 | 4 | 5 | 2   | 3 |
| 2,00 | 14,00 | 11,00 | 3 | 3 | 5 | 3 | 2   | 1 |
| 2,00 | 14,00 | 11,00 | 3 | 5 | 3 | 4 | 2   | 2 |
| 2,00 | 14,00 | 11,00 | 3 | 4 | 5 | 4 | 4   | 3 |
| 2,00 | 15,00 | 11,00 | 3 | 2 | 5 | 3 | 1   | 3 |
| 2,00 | 15,00 | 11,00 | 3 | 4 | 4 | 4 | 2   | 2 |
| 2,00 | 14,00 | 8,00  | 3 | 4 | 4 | 4 | 3   | 3 |
| 2,00 | 14,00 | 8,00  | 3 | 4 | 5 | 4 | 2   | 1 |
| 2,00 | 14,00 | 8,00  | 3 | 4 | 5 | 4 | 3   | 3 |
| 2,00 | 14,00 | 8,00  | 3 | 3 | 4 | 3 | 2   | 1 |
| 2,00 | 15,00 | 8,00  | 3 | 4 | 2 | 3 | 2   | 1 |
| 2,00 | 15,00 | 8,00  | 3 | 4 | 4 | 5 | 3   | 2 |

|      |       |       |   |   |   |   |   |   |
|------|-------|-------|---|---|---|---|---|---|
| 2,00 | 15,00 | 8,00  | 3 | 5 | 5 | 4 | 3 | 1 |
| 2,00 | 15,00 | 8,00  | 3 | 5 | 3 | 4 | 2 | 4 |
| 2,00 | 15,00 | 8,00  | 3 | 2 | 3 | 1 | 2 | 1 |
| 2,00 | 16,00 | 8,00  | 3 | 2 | 4 | 3 | 1 | 1 |
| 2,00 | 17,00 | 8,00  | 3 | 5 | 3 | 5 | 1 | 2 |
| 2,00 | 17,00 | 8,00  | 3 | 5 | 4 | 4 | 2 | 1 |
| 2,00 | 14,00 | 7,00  | 3 | 4 | 3 | 4 | 2 | 1 |
| 2,00 | 15,00 | 7,00  | 3 | 3 | 5 | 4 | 1 | 1 |
| 2,00 | 14,00 | 6,00  | 3 | 5 | 5 | 4 | 3 | 5 |
| 2,00 | 14,00 | 6,00  | 3 | 4 | 3 | 4 | 2 | 2 |
| 2,00 | 14,00 | 5,00  | 3 | 3 | 4 | 4 | 1 | 3 |
| 2,00 | 14,00 | 5,00  | 3 | 2 | 3 | 4 | 2 | 1 |
| 2,00 | 14,00 | 5,00  | 3 | 3 | 4 | 4 | 1 | 2 |
| 2,00 | 14,00 | 5,00  | 3 | 3 | 4 | 3 | 1 | 3 |
| 2,00 | 14,00 | 5,00  | 3 | 5 | 4 | 5 | 2 | 2 |
| 2,00 | 14,00 | 5,00  | 3 | 4 | 3 | 4 | 2 | 2 |
| 2,00 | 14,00 | 5,00  | 3 | 4 | 3 | 5 | 2 | 1 |
| 2,00 | 15,00 | 5,00  | 3 | 2 | 4 | 2 | 2 | 3 |
| 2,00 | 14,00 | 4,00  | 3 | 5 | 4 | 4 | 2 | 2 |
| 2,00 | 14,00 | 4,00  | 3 | 3 | 4 | 3 | 2 | 1 |
| 2,00 | 15,00 | 4,00  | 3 | 3 | 4 | 2 | 2 | 2 |
| 2,00 | 14,00 | 3,00  | 3 | 4 | 4 | 4 | 2 | 2 |
| 2,00 | 14,00 | 3,00  | 3 | 4 | 4 | 4 | 2 | 3 |
| 2,00 | 14,00 | 3,00  | 3 | 5 | 2 | 3 | 2 | 1 |
| 2,00 | 14,00 | 3,00  | 3 | 5 | 3 | 4 | 1 | 4 |
| 2,00 | 14,00 | 3,00  | 3 | 5 | 4 | 5 | 1 | 1 |
| 2,00 | 14,00 | 3,00  | 3 | 4 | 4 | 3 | 2 | 2 |
| 2,00 | 14,00 | 3,00  | 3 | 4 | 4 | 3 | 2 | 2 |
| 2,00 | 14,00 | 3,00  | 3 | 3 | 4 | 5 | 3 | 3 |
| 2,00 | 14,00 | 3,00  | 3 | 4 | 4 | 5 | 2 | 1 |
| 2,00 | 14,00 | 3,00  | 3 | 5 | 4 | 2 | 3 | 2 |
| 2,00 | 14,00 | 3,00  | 3 | 4 | 3 | 1 | 1 | 1 |
| 2,00 | 15,00 | 3,00  | 3 | 4 | 3 | 4 | 1 | 1 |
| 2,00 | 17,00 | 3,00  | 3 | 2 | 2 | 3 | 1 | 4 |
| 2,00 | 14,00 | 2,00  | 3 | 4 | 4 | 4 | 3 | 3 |
| 2,00 | 14,00 | 2,00  | 3 | 4 | 4 | 5 | 3 | 3 |
| 2,00 | 15,00 | 6,00  | 4 | 2 | 3 | 2 | 2 | 3 |
| 2,00 | 16,00 | 6,00  | 4 | 4 | 4 | 3 | 1 | 4 |
| 2,00 | 17,00 | 6,00  | 4 | 5 | 5 | 4 | 2 | 5 |
| 2,00 | 15,00 | 3,00  | 4 | 5 | 2 | 3 | 3 | 4 |
| 2,00 | 15,00 | 3,00  | 4 | 5 | 5 | 3 | 1 | 5 |
| 2,00 | 16,00 | 3,00  | 4 | 4 | 3 | 3 | 2 | 1 |
| 2,00 | 15,00 | 7,00  | 4 | 3 | 3 | 2 | 1 | 1 |
| 2,00 | 16,00 | 6,00  | 4 | 4 | 5 | 5 | 1 | 1 |
| 2,00 | 15,00 | 6,00  | 4 | 4 | 4 | 4 | 2 | 1 |
| 2,00 | 15,00 | 4,00  | 4 | 5 | 5 | 5 | 1 | 1 |
| 2,00 | 16,00 | 3,00  | 4 | 5 | 4 | 3 | 3 | 2 |
| 2,00 | 15,00 | 2,00  | 4 | 3 | 4 | 3 | 4 | 2 |
| 2,00 | 15,00 | 11,00 | 4 | 5 | 4 | 4 | 2 | 3 |
| 2,00 | 16,00 | 11,00 | 4 | 3 | 4 | 4 | 1 | 1 |

|      |        |       |   |     |     |     |     |     |
|------|--------|-------|---|-----|-----|-----|-----|-----|
| 2,00 | 16,00  | 11,00 | 4 | 4   | 3   | 2   | 1   | 3   |
| 2,00 | 16,00  | 11,00 | 4 | 4   | 3   | 4   | 2   | 1   |
| 2,00 | 15,00  | 8,00  | 4 | 3   | 3   | 3   | 4   | 2   |
| 2,00 | 16,00  | 8,00  | 4 | 5   | 1   | 5   | 1   | 1   |
| 2,00 | 15,00  | 7,00  | 4 | 3   | 4   | 3   | 5   | 1   |
| 2,00 | 16,00  | 6,00  | 4 | 4   | 3   | 4   | 2   | 4   |
| 2,00 | 15,00  | 3,00  | 4 | 5   | 4   | 4   | 2   | 1   |
| 2,00 | 15,00  | 3,00  | 4 | 4   | 5   | 4   | 1   | 1   |
| 2,00 | 15,00  | 3,00  | 4 | 1   | 2   | 2   | 2   | 2   |
| 2,00 | 15,00  | 3,00  | 4 | 2   | 4   | 3   | 1   | 4   |
| 2,00 | 15,00  | 3,00  | 4 | 3   | 4   | 4   | 1   | 3   |
| 2,00 | 15,00  | 3,00  | 4 | 5   | 4   | 3   | 2   | 2   |
| 2,00 | 15,00  | 3,00  | 4 | 3   | 3   | 3   | 2   | 1   |
| 2,00 | 15,00  | 3,00  | 4 | 5   | 3   | 4   | 2   | 1   |
| 2,00 | 16,00  | 3,00  | 4 | 3   | 4   | 4   | 2   | 4   |
| 2,00 | 16,00  | 2,00  | 4 | 5   | 5   | 4   | 1   | 1   |
| 2,00 | 15,00  | 11,00 | 4 | 4   | 3   | 4   | 2   | 1   |
| 2,00 | 15,00  | 11,00 | 4 | 5   | 4   | 3   | 3   | 3   |
| 2,00 | 15,00  | 11,00 | 4 | 5   | 3   | 4   | 1   | 1   |
| 2,00 | 15,00  | 11,00 | 4 | 3   | 4   | 3   | 4   | 3   |
| 2,00 | 15,00  | 11,00 | 4 | 4   | 2   | 3   | 3   | 2   |
| 2,00 | 15,00  | 11,00 | 4 | 4   | 3   | 4   | 3   | 4   |
| 2,00 | 15,00  | 8,00  | 4 | 2   | 3   | 3   | 2   | 1   |
| 2,00 | 16,00  | 8,00  | 4 | 4   | 5   | 3   | 1   | 1   |
| 2,00 | 15,00  | 7,00  | 4 | 4   | 3   | 3   | 2   | 2   |
| 2,00 | 15,00  | 7,00  | 4 | 3   | 3   | 3   | 2   | 4   |
| 2,00 | 15,00  | 7,00  | 4 | 999 | 999 | 999 | 999 | 999 |
| 2,00 | 15,00  | 7,00  | 4 | 5   | 4   | 4   | 2   | 3   |
| 2,00 | 16,00  | 7,00  | 4 | 3   | 3   | 3   | 4   | 2   |
| 2,00 | 16,00  | 7,00  | 4 | 4   | 4   | 4   | 2   | 2   |
| 2,00 | 15,00  | 6,00  | 4 | 4   | 2   | 5   | 3   | 2   |
| 2,00 | 15,00  | 5,00  | 4 | 5   | 4   | 4   | 3   | 3   |
| 2,00 | 15,00  | 5,00  | 4 | 4   | 5   | 4   | 2   | 2   |
| 2,00 | 15,00  | 4,00  | 4 | 1   | 2   | 2   | 2   | 4   |
| 2,00 | 15,00  | 4,00  | 4 | 4   | 3   | 3   | 2   | 1   |
| 2,00 | 999,00 | 4,00  | 4 | 3   | 2   | 2   | 2   | 4   |
| 2,00 | 15,00  | 3,00  | 4 | 5   | 5   | 5   | 2   | 2   |
| 2,00 | 15,00  | 3,00  | 4 | 3   | 3   | 4   | 3   | 2   |
| 2,00 | 15,00  | 3,00  | 4 | 3   | 3   | 4   | 2   | 2   |
| 2,00 | 15,00  | 3,00  | 4 | 4   | 3   | 4   | 2   | 1   |
| 2,00 | 15,00  | 3,00  | 4 | 4   | 3   | 4   | 2   | 4   |
| 2,00 | 15,00  | 3,00  | 4 | 4   | 4   | 5   | 2   | 1   |
| 2,00 | 15,00  | 3,00  | 4 | 4   | 3   | 2   | 3   | 2   |
| 2,00 | 15,00  | 3,00  | 4 | 5   | 5   | 4   | 2   | 2   |
| 2,00 | 15,00  | 3,00  | 4 | 4   | 5   | 3   | 1   | 2   |
| 2,00 | 15,00  | 3,00  | 4 | 4   | 4   | 4   | 2   | 2   |
| 2,00 | 15,00  | 3,00  | 4 | 5   | 4   | 5   | 1   | 1   |
| 2,00 | 15,00  | 3,00  | 4 | 4   | 4   | 4   | 2   | 4   |
| 2,00 | 15,00  | 3,00  | 4 | 4   | 2   | 4   | 1   | 5   |
| 2,00 | 15,00  | 3,00  | 4 | 4   | 4   | 3   | 2   | 2   |



|        |        |       |   |   |   |     |   |   |
|--------|--------|-------|---|---|---|-----|---|---|
| 2,00   | 15,00  | 3,00  | 4 | 5 | 4 | 5   | 1 | 1 |
| 2,00   | 15,00  | 3,00  | 4 | 4 | 2 | 4   | 1 | 1 |
| 2,00   | 15,00  | 3,00  | 4 | 4 | 4 | 4   | 2 | 5 |
| 2,00   | 15,00  | 3,00  | 4 | 5 | 4 | 4   | 2 | 1 |
| 2,00   | 16,00  | 3,00  | 4 | 4 | 4 | 5   | 1 | 1 |
| 2,00   | 16,00  | 3,00  | 4 | 5 | 5 | 999 | 4 | 1 |
| 2,00   | 16,00  | 3,00  | 4 | 3 | 4 | 4   | 2 | 1 |
| 2,00   | 16,00  | 3,00  | 4 | 4 | 5 | 3   | 2 | 3 |
| 2,00   | 15,00  | 2,00  | 4 | 2 | 2 | 1   | 2 | 1 |
| 2,00   | 15,00  | 2,00  | 4 | 2 | 2 | 4   | 1 | 1 |
| 2,00   | 16,00  | 2,00  | 4 | 3 | 3 | 4   | 1 | 5 |
| 999,00 | 999,00 | 7,00  | 1 | 4 | 4 | 3   | 2 | 2 |
| 999,00 | 13,00  | 5,00  | 1 | 5 | 5 | 4   | 2 | 2 |
| 999,00 | 14,00  | 8,00  | 3 | 5 | 5 | 5   | 2 | 1 |
| 999,00 | 14,00  | 2,00  | 3 | 3 | 4 | 4   | 2 | 1 |
| 999,00 | 15,00  | 11,00 | 4 | 4 | 5 | 5   | 1 | 2 |

| IPPA_A6 | IPPA_A7 | IPPA_A8 | IPPA_A9 | IPPA_A10 | IPPA_A11 | IPPA_A12 | IPPA_A13 | IPPA_A14 |
|---------|---------|---------|---------|----------|----------|----------|----------|----------|
| 5       | 2       | 5       | 5       | 1        | 1        | 5        | 5        | 1        |
| 5       | 3       | 5       | 3       | 2        | 1        | 4        | 5        | 1        |
| 4       | 3       | 4       | 3       | 4        | 2        | 3        | 5        | 3        |
| 5       | 5       | 5       | 5       | 1        | 1        | 5        | 5        | 5        |
| 4       | 2       | 3       | 4       | 5        | 2        | 3        | 5        | 3        |
| 4       | 4       | 5       | 3       | 2        | 1        | 5        | 5        | 1        |
| 5       | 1       | 5       | 4       | 3        | 1        | 5        | 4        | 5        |
| 4       | 4       | 5       | 5       | 1        | 3        | 3        | 5        | 5        |
| 2       | 3       | 4       | 5       | 4        | 3        | 2        | 5        | 2        |
| 5       | 5       | 5       | 5       | 2        | 1        | 5        | 5        | 5        |
| 2       | 3       | 4       | 2       | 2        | 2        | 2        | 2        | 3        |
| 5       | 5       | 5       | 4       | 1        | 1        | 999      | 5        | 5        |
| 3       | 2       | 5       | 4       | 999      | 2        | 2        | 4        | 4        |
| 4       | 5       | 5       | 5       | 3        | 2        | 4        | 4        | 999      |
| 5       | 3       | 5       | 3       | 1        | 1        | 5        | 5        | 5        |
| 4       | 3       | 5       | 4       | 1        | 1        | 4        | 5        | 4        |
| 5       | 1       | 5       | 2       | 2        | 1        | 5        | 5        | 5        |
| 4       | 4       | 5       | 5       | 2        | 1        | 5        | 5        | 5        |
| 4       | 2       | 3       | 999     | 4        | 4        | 2        | 999      | 2        |
| 3       | 2       | 4       | 3       | 4        | 2        | 3        | 4        | 3        |
| 5       | 2       | 5       | 4       | 1        | 4        | 5        | 5        | 5        |
| 2       | 4       | 4       | 5       | 4        | 2        | 3        | 4        | 4        |
| 4       | 2       | 4       | 5       | 2        | 2        | 4        | 5        | 4        |
| 4       | 4       | 3       | 3       | 2        | 4        | 4        | 5        | 3        |
| 4       | 3       | 5       | 4       | 1        | 1        | 5        | 5        | 4        |
| 4       | 4       | 5       | 3       | 2        | 1        | 4        | 5        | 5        |
| 4       | 4       | 3       | 3       | 3        | 2        | 4        | 4        | 4        |
| 5       | 5       | 5       | 4       | 3        | 2        | 4        | 5        | 4        |
| 2       | 3       | 4       | 5       | 4        | 4        | 3        | 5        | 3        |
| 4       | 3       | 5       | 5       | 4        | 1        | 5        | 5        | 5        |
| 5       | 5       | 5       | 999     | 1        | 1        | 5        | 5        | 5        |
| 999     | 999     | 999     | 4       | 999      | 999      | 999      | 4        | 999      |
| 3       | 4       | 5       | 1       | 1        | 1        | 5        | 5        | 3        |
| 5       | 4       | 5       | 5       | 4        | 1        | 4        | 5        | 5        |
| 3       | 5       | 5       | 3       | 3        | 2        | 5        | 4        | 4        |
| 3       | 4       | 1       | 2       | 2        | 4        | 3        | 3        | 2        |
| 3       | 3       | 4       | 3       | 2        | 2        | 3        | 4        | 3        |
| 4       | 4       | 5       | 5       | 5        | 1        | 4        | 5        | 4        |
| 4       | 4       | 5       | 4       | 4        | 2        | 4        | 4        | 4        |
| 3       | 4       | 5       | 5       | 3        | 1        | 4        | 5        | 5        |
| 5       | 4       | 5       | 1       | 1        | 1        | 4        | 5        | 5        |
| 5       | 5       | 5       | 1       | 5        | 1        | 5        | 5        | 5        |
| 3       | 1       | 4       | 2       | 1        | 3        | 3        | 4        | 4        |
| 5       | 4       | 5       | 3       | 1        | 1        | 5        | 5        | 5        |
| 4       | 2       | 4       | 3       | 2        | 2        | 4        | 4        | 4        |
| 2       | 3       | 2       | 5       | 5        | 5        | 2        | 3        | 2        |
| 5       | 3       | 5       | 4       | 3        | 1        | 5        | 5        | 5        |
| 4       | 3       | 5       | 4       | 2        | 2        | 4        | 4        | 4        |
| 5       | 3       | 5       | 5       | 3        | 5        | 5        | 5        | 4        |

|   |   |   |   |   |   |   |   |   |
|---|---|---|---|---|---|---|---|---|
| 3 | 3 | 4 | 4 | 3 | 2 | 4 | 3 | 5 |
| 5 | 4 | 4 | 5 | 4 | 2 | 1 | 5 | 4 |
| 3 | 5 | 1 | 5 | 1 | 4 | 5 | 5 | 4 |
| 5 | 1 | 5 | 3 | 5 | 2 | 4 | 5 | 4 |
| 5 | 5 | 5 | 3 | 5 | 1 | 3 | 5 | 5 |
| 5 | 3 | 5 | 4 | 1 | 1 | 3 | 5 | 4 |
| 1 | 3 | 4 | 4 | 5 | 5 | 4 | 4 | 3 |
| 3 | 4 | 5 | 5 | 3 | 2 | 5 | 5 | 3 |
| 4 | 4 | 5 | 4 | 3 | 1 | 5 | 5 | 5 |
| 2 | 3 | 5 | 4 | 2 | 1 | 1 | 4 | 5 |
| 5 | 5 | 5 | 5 | 1 | 1 | 5 | 5 | 5 |
| 5 | 5 | 5 | 4 | 1 | 1 | 4 | 5 | 5 |
| 3 | 3 | 3 | 1 | 1 | 3 | 3 | 3 | 3 |
| 4 | 5 | 4 | 4 | 2 | 2 | 4 | 4 | 4 |
| 5 | 5 | 5 | 4 | 3 | 2 | 4 | 5 | 4 |
| 3 | 2 | 5 | 3 | 3 | 1 | 4 | 5 | 3 |
| 4 | 3 | 4 | 5 | 3 | 2 | 4 | 4 | 4 |
| 4 | 3 | 4 | 3 | 2 | 3 | 4 | 4 | 4 |
| 4 | 3 | 5 | 4 | 1 | 1 | 3 | 4 | 3 |
| 5 | 2 | 5 | 3 | 3 | 1 | 5 | 5 | 5 |
| 4 | 5 | 5 | 3 | 5 | 1 | 4 | 4 | 4 |
| 4 | 2 | 5 | 4 | 3 | 1 | 4 | 5 | 5 |
| 4 | 3 | 5 | 5 | 2 | 2 | 4 | 5 | 4 |
| 2 | 3 | 4 | 5 | 3 | 1 | 3 | 3 | 3 |
| 5 | 4 | 5 | 3 | 4 | 1 | 4 | 5 | 4 |
| 3 | 3 | 5 | 3 | 3 | 1 | 4 | 5 | 5 |
| 5 | 4 | 5 | 2 | 1 | 1 | 4 | 5 | 5 |
| 4 | 5 | 4 | 2 | 2 | 3 | 4 | 4 | 5 |
| 4 | 4 | 4 | 5 | 4 | 1 | 4 | 5 | 4 |
| 3 | 5 | 5 | 4 | 3 | 5 | 5 | 5 | 5 |
| 4 | 5 | 5 | 1 | 1 | 3 | 4 | 5 | 5 |
| 4 | 2 | 5 | 4 | 4 | 4 | 3 | 5 | 4 |
| 5 | 5 | 5 | 5 | 1 | 1 | 5 | 5 | 5 |
| 1 | 1 | 2 | 4 | 5 | 5 | 1 | 1 | 1 |
| 2 | 2 | 3 | 4 | 4 | 4 | 3 | 3 | 4 |
| 5 | 5 | 5 | 5 | 1 | 1 | 3 | 5 | 5 |
| 5 | 5 | 5 | 4 | 1 | 1 | 5 | 4 | 5 |
| 5 | 5 | 5 | 3 | 2 | 1 | 5 | 5 | 5 |
| 4 | 4 | 5 | 3 | 1 | 1 | 4 | 5 | 5 |
| 4 | 4 | 5 | 5 | 1 | 2 | 5 | 5 | 5 |
| 5 | 4 | 5 | 4 | 5 | 4 | 3 | 3 | 5 |
| 3 | 3 | 3 | 2 | 1 | 1 | 3 | 3 | 3 |
| 4 | 3 | 4 | 5 | 2 | 1 | 4 | 5 | 4 |
| 5 | 5 | 5 | 4 | 1 | 1 | 5 | 5 | 5 |
| 5 | 3 | 5 | 5 | 4 | 3 | 4 | 5 | 5 |
| 4 | 4 | 5 | 4 | 2 | 1 | 4 | 5 | 3 |
| 4 | 4 | 5 | 5 | 4 | 1 | 5 | 5 | 5 |
| 5 | 5 | 5 | 5 | 1 | 1 | 1 | 5 | 1 |
| 3 | 5 | 5 | 4 | 1 | 1 | 5 | 5 | 2 |
| 4 | 3 | 5 | 1 | 1 | 1 | 5 | 5 | 5 |

|   |     |   |     |   |   |   |   |   |
|---|-----|---|-----|---|---|---|---|---|
| 5 | 3   | 5 | 4   | 1 | 3 | 4 | 5 | 1 |
| 5 | 5   | 5 | 5   | 1 | 1 | 5 | 5 | 5 |
| 5 | 4   | 5 | 5   | 1 | 1 | 5 | 5 | 1 |
| 5 | 4   | 5 | 5   | 5 | 1 | 4 | 5 | 5 |
| 5 | 5   | 5 | 4   | 3 | 1 | 5 | 5 | 5 |
| 5 | 5   | 5 | 5   | 1 | 1 | 5 | 5 | 5 |
| 4 | 4   | 4 | 3   | 2 | 2 | 3 | 4 | 5 |
| 5 | 5   | 5 | 5   | 2 | 1 | 5 | 5 | 5 |
| 2 | 2   | 5 | 4   | 5 | 2 | 2 | 3 | 2 |
| 5 | 5   | 5 | 1   | 1 | 1 | 5 | 5 | 5 |
| 4 | 2   | 5 | 3   | 2 | 1 | 5 | 3 | 4 |
| 4 | 5   | 5 | 4   | 2 | 5 | 5 | 5 | 4 |
| 5 | 5   | 5 | 5   | 1 | 1 | 5 | 5 | 5 |
| 3 | 2   | 5 | 5   | 1 | 2 | 4 | 4 | 4 |
| 4 | 2   | 5 | 3   | 1 | 1 | 5 | 5 | 4 |
| 4 | 4   | 4 | 5   | 4 | 1 | 5 | 5 | 5 |
| 4 | 4   | 5 | 4   | 3 | 2 | 4 | 4 | 5 |
| 4 | 4   | 5 | 3   | 2 | 1 | 4 | 5 | 5 |
| 5 | 5   | 5 | 3   | 5 | 5 | 4 | 5 | 3 |
| 2 | 1   | 3 | 2   | 3 | 3 | 5 | 3 | 3 |
| 5 | 5   | 4 | 5   | 1 | 1 | 5 | 5 | 5 |
| 3 | 999 | 5 | 2   | 3 | 1 | 4 | 5 | 4 |
| 5 | 3   | 5 | 1   | 1 | 1 | 5 | 5 | 5 |
| 4 | 3   | 5 | 3   | 3 | 1 | 4 | 5 | 5 |
| 4 | 5   | 4 | 3   | 2 | 2 | 4 | 5 | 4 |
| 5 | 5   | 5 | 5   | 1 | 1 | 3 | 5 | 5 |
| 4 | 3   | 5 | 2   | 3 | 2 | 4 | 5 | 4 |
| 5 | 5   | 5 | 5   | 1 | 1 | 5 | 5 | 5 |
| 2 | 2   | 4 | 3   | 1 | 1 | 5 | 4 | 5 |
| 5 | 3   | 4 | 5   | 4 | 3 | 2 | 5 | 5 |
| 3 | 3   | 3 | 999 | 3 | 2 | 5 | 5 | 4 |
| 5 | 5   | 5 | 4   | 1 | 1 | 5 | 5 | 5 |
| 3 | 4   | 4 | 5   | 5 | 1 | 4 | 3 | 4 |
| 4 | 4   | 4 | 4   | 5 | 2 | 4 | 4 | 3 |
| 4 | 3   | 5 | 4   | 3 | 2 | 3 | 4 | 5 |
| 4 | 4   | 5 | 4   | 2 | 3 | 2 | 5 | 4 |
| 4 | 4   | 4 | 4   | 4 | 1 | 4 | 5 | 5 |
| 5 | 5   | 4 | 5   | 5 | 4 | 5 | 3 | 5 |
| 4 | 5   | 5 | 3   | 1 | 1 | 5 | 5 | 4 |
| 4 | 5   | 5 | 5   | 1 | 2 | 4 | 5 | 2 |
| 5 | 4   | 5 | 4   | 1 | 1 | 5 | 5 | 5 |
| 4 | 2   | 5 | 3   | 2 | 2 | 5 | 5 | 5 |
| 3 | 5   | 5 | 4   | 3 | 2 | 4 | 5 | 5 |
| 2 | 2   | 5 | 3   | 5 | 2 | 4 | 4 | 4 |
| 4 | 4   | 5 | 3   | 2 | 2 | 4 | 5 | 3 |
| 4 | 4   | 5 | 4   | 3 | 1 | 4 | 5 | 5 |
| 2 | 3   | 5 | 4   | 5 | 1 | 4 | 3 | 3 |
| 5 | 5   | 5 | 5   | 4 | 1 | 5 | 5 | 5 |
| 3 | 2   | 4 | 5   | 3 | 3 | 3 | 5 | 3 |
| 5 | 4   | 4 | 5   | 4 | 1 | 3 | 5 | 5 |

|   |   |   |   |   |   |   |   |   |
|---|---|---|---|---|---|---|---|---|
| 4 | 2 | 5 | 4 | 2 | 1 | 3 | 5 | 5 |
| 4 | 5 | 5 | 4 | 3 | 1 | 4 | 5 | 4 |
| 5 | 3 | 5 | 4 | 2 | 2 | 5 | 5 | 4 |
| 5 | 5 | 5 | 5 | 2 | 2 | 4 | 5 | 5 |
| 4 | 3 | 5 | 5 | 3 | 1 | 5 | 4 | 4 |
| 5 | 3 | 5 | 2 | 1 | 1 | 5 | 5 | 5 |
| 4 | 3 | 4 | 2 | 4 | 2 | 4 | 3 | 4 |
| 5 | 4 | 5 | 4 | 3 | 1 | 5 | 5 | 5 |
| 4 | 2 | 5 | 3 | 1 | 1 | 5 | 5 | 4 |
| 4 | 5 | 5 | 4 | 2 | 1 | 5 | 5 | 4 |
| 4 | 3 | 4 | 5 | 3 | 2 | 5 | 5 | 4 |
| 5 | 4 | 5 | 5 | 2 | 1 | 5 | 5 | 4 |
| 3 | 3 | 4 | 4 | 5 | 5 | 3 | 4 | 3 |
| 3 | 2 | 3 | 4 | 2 | 3 | 3 | 4 | 3 |
| 4 | 3 | 4 | 4 | 3 | 3 | 4 | 5 | 4 |
| 2 | 5 | 4 | 3 | 4 | 2 | 2 | 4 | 3 |
| 3 | 3 | 4 | 2 | 3 | 2 | 5 | 5 | 3 |
| 5 | 4 | 5 | 3 | 1 | 1 | 5 | 5 | 4 |
| 4 | 5 | 5 | 3 | 1 | 1 | 4 | 5 | 5 |
| 3 | 4 | 5 | 3 | 4 | 3 | 4 | 4 | 5 |
| 4 | 4 | 5 | 5 | 2 | 2 | 4 | 5 | 3 |
| 5 | 5 | 5 | 5 | 1 | 1 | 5 | 5 | 5 |
| 5 | 5 | 5 | 5 | 1 | 1 | 5 | 5 | 5 |
| 4 | 5 | 5 | 2 | 1 | 1 | 5 | 5 | 4 |
| 5 | 5 | 5 | 5 | 1 | 1 | 5 | 5 | 1 |
| 4 | 3 | 5 | 3 | 1 | 1 | 5 | 5 | 4 |
| 4 | 2 | 5 | 4 | 2 | 2 | 4 | 5 | 4 |
| 5 | 5 | 5 | 5 | 2 | 1 | 5 | 5 | 5 |
| 3 | 4 | 5 | 3 | 4 | 2 | 4 | 5 | 4 |
| 5 | 4 | 5 | 4 | 1 | 1 | 4 | 5 | 5 |
| 4 | 4 | 5 | 4 | 2 | 1 | 4 | 5 | 3 |
| 3 | 4 | 5 | 4 | 4 | 1 | 4 | 3 | 3 |
| 4 | 3 | 5 | 2 | 2 | 2 | 5 | 5 | 5 |
| 2 | 2 | 3 | 3 | 4 | 3 | 2 | 3 | 3 |
| 3 | 3 | 3 | 4 | 2 | 2 | 3 | 3 | 3 |
| 4 | 4 | 4 | 5 | 2 | 1 | 4 | 5 | 5 |
| 5 | 5 | 5 | 5 | 1 | 1 | 4 | 5 | 5 |
| 5 | 4 | 5 | 3 | 2 | 1 | 4 | 5 | 5 |
| 4 | 4 | 5 | 5 | 1 | 1 | 5 | 5 | 4 |
| 5 | 5 | 5 | 3 | 1 | 1 | 5 | 5 | 5 |
| 4 | 3 | 5 | 4 | 3 | 3 | 3 | 5 | 2 |
| 4 | 3 | 5 | 5 | 1 | 1 | 5 | 5 | 5 |
| 4 | 3 | 5 | 3 | 2 | 1 | 4 | 5 | 5 |
| 5 | 5 | 5 | 4 | 2 | 1 | 5 | 5 | 4 |
| 5 | 4 | 4 | 4 | 2 | 2 | 4 | 4 | 4 |
| 5 | 3 | 5 | 5 | 4 | 1 | 5 | 5 | 4 |
| 5 | 4 | 5 | 3 | 2 | 2 | 4 | 4 | 4 |
| 3 | 2 | 5 | 5 | 3 | 1 | 5 | 5 | 5 |
| 4 | 3 | 5 | 5 | 2 | 1 | 5 | 5 | 5 |
| 5 | 5 | 5 | 5 | 4 | 2 | 5 | 5 | 5 |



|   |   |   |   |     |     |   |   |     |
|---|---|---|---|-----|-----|---|---|-----|
| 1 | 2 | 4 | 2 | 5   | 5   | 3 | 3 | 3   |
| 3 | 3 | 2 | 2 | 3   | 2   | 3 | 4 | 3   |
| 3 | 4 | 5 | 5 | 3   | 1   | 5 | 5 | 4   |
| 4 | 3 | 5 | 3 | 2   | 1   | 5 | 5 | 4   |
| 4 | 4 | 4 | 2 | 4   | 3   | 4 | 4 | 3   |
| 4 | 5 | 5 | 5 | 3   | 4   | 5 | 5 | 4   |
| 4 | 4 | 5 | 4 | 3   | 3   | 5 | 5 | 5   |
| 4 | 5 | 3 | 5 | 2   | 2   | 4 | 5 | 5   |
| 3 | 2 | 3 | 3 | 3   | 2   | 3 | 4 | 4   |
| 3 | 2 | 3 | 4 | 3   | 3   | 3 | 3 | 4   |
| 5 | 4 | 5 | 4 | 2   | 2   | 5 | 4 | 4   |
| 3 | 4 | 3 | 3 | 1   | 2   | 3 | 5 | 2   |
| 4 | 5 | 5 | 2 | 1   | 1   | 5 | 5 | 4   |
| 4 | 4 | 5 | 5 | 3   | 4   | 4 | 5 | 4   |
| 4 | 5 | 5 | 5 | 4   | 1   | 5 | 5 | 5   |
| 5 | 5 | 4 | 3 | 2   | 2   | 5 | 5 | 4   |
| 5 | 5 | 5 | 1 | 5   | 1   | 5 | 5 | 5   |
| 5 | 5 | 5 | 4 | 2   | 1   | 5 | 5 | 5   |
| 1 | 1 | 2 | 3 | 3   | 3   | 3 | 1 | 4   |
| 3 | 2 | 4 | 5 | 3   | 5   | 4 | 3 | 5   |
| 2 | 2 | 4 | 3 | 5   | 4   | 2 | 2 | 3   |
| 5 | 4 | 5 | 2 | 1   | 1   | 4 | 5 | 4   |
| 2 | 1 | 5 | 2 | 4   | 2   | 2 | 3 | 2   |
| 4 | 3 | 5 | 1 | 999 | 1   | 3 | 5 | 4   |
| 5 | 5 | 5 | 5 | 3   | 3   | 5 | 5 | 4   |
| 3 | 4 | 5 | 5 | 4   | 1   | 3 | 3 | 4   |
| 4 | 5 | 5 | 5 | 2   | 2   | 4 | 5 | 4   |
| 3 | 3 | 4 | 4 | 3   | 2   | 3 | 4 | 3   |
| 5 | 3 | 5 | 4 | 1   | 3   | 4 | 5 | 4   |
| 3 | 5 | 5 | 2 | 4   | 3   | 4 | 5 | 4   |
| 4 | 5 | 5 | 4 | 2   | 2   | 5 | 5 | 4   |
| 5 | 3 | 5 | 5 | 5   | 1   | 4 | 5 | 1   |
| 4 | 5 | 5 | 3 | 2   | 1   | 5 | 5 | 999 |
| 4 | 4 | 5 | 4 | 3   | 1   | 5 | 4 | 5   |
| 4 | 3 | 5 | 5 | 4   | 3   | 4 | 5 | 5   |
| 4 | 5 | 5 | 2 | 3   | 999 | 5 | 4 | 4   |
| 4 | 3 | 5 | 3 | 2   | 2   | 4 | 4 | 4   |
| 5 | 1 | 5 | 1 | 999 | 1   | 5 | 5 | 5   |
| 4 | 5 | 5 | 4 | 3   | 1   | 5 | 5 | 5   |
| 5 | 5 | 5 | 5 | 1   | 1   | 5 | 5 | 5   |
| 4 | 3 | 5 | 1 | 3   | 1   | 4 | 5 | 5   |
| 4 | 4 | 5 | 4 | 1   | 1   | 5 | 5 | 4   |
| 4 | 3 | 5 | 3 | 2   | 2   | 4 | 4 | 4   |
| 4 | 3 | 5 | 3 | 5   | 2   | 4 | 5 | 4   |
| 4 | 3 | 5 | 3 | 2   | 2   | 4 | 4 | 4   |
| 4 | 3 | 5 | 4 | 2   | 1   | 4 | 3 | 4   |
| 4 | 5 | 5 | 3 | 2   | 1   | 5 | 5 | 4   |
| 4 | 3 | 5 | 3 | 3   | 2   | 4 | 5 | 4   |
| 3 | 2 | 5 | 4 | 3   | 1   | 5 | 5 | 5   |
| 4 | 3 | 5 | 3 | 2   | 2   | 5 | 4 | 5   |

|     |   |   |   |   |   |   |   |   |
|-----|---|---|---|---|---|---|---|---|
| 5   | 4 | 5 | 5 | 1 | 1 | 5 | 5 | 5 |
| 5   | 1 | 5 | 5 | 1 | 1 | 3 | 5 | 5 |
| 3   | 2 | 4 | 5 | 4 | 4 | 3 | 3 | 3 |
| 2   | 1 | 3 | 4 | 5 | 3 | 3 | 4 | 4 |
| 4   | 4 | 5 | 5 | 3 | 2 | 2 | 4 | 5 |
| 999 | 5 | 5 | 4 | 1 | 1 | 5 | 5 | 5 |
| 4   | 3 | 5 | 5 | 2 | 1 | 4 | 5 | 3 |
| 4   | 4 | 5 | 4 | 3 | 1 | 3 | 5 | 4 |
| 4   | 5 | 5 | 3 | 1 | 1 | 4 | 5 | 3 |
| 5   | 4 | 5 | 2 | 3 | 2 | 4 | 4 | 4 |
| 4   | 5 | 4 | 3 | 2 | 1 | 4 | 4 | 4 |
| 4   | 5 | 5 | 2 | 1 | 1 | 4 | 4 | 5 |
| 4   | 5 | 5 | 4 | 1 | 2 | 4 | 5 | 4 |
| 5   | 5 | 5 | 5 | 1 | 1 | 5 | 5 | 5 |
| 5   | 5 | 5 | 5 | 3 | 1 | 5 | 5 | 5 |
| 4   | 5 | 5 | 4 | 3 | 2 | 4 | 5 | 5 |
| 5   | 5 | 5 | 5 | 3 | 1 | 5 | 5 | 5 |
| 4   | 5 | 5 | 3 | 1 | 2 | 5 | 5 | 4 |
| 3   | 4 | 5 | 4 | 3 | 1 | 5 | 5 | 5 |
| 2   | 5 | 5 | 3 | 1 | 1 | 4 | 3 | 4 |
| 5   | 1 | 4 | 5 | 2 | 1 | 4 | 5 | 1 |
| 4   | 4 | 5 | 5 | 3 | 1 | 4 | 5 | 5 |
| 5   | 4 | 5 | 5 | 3 | 2 | 5 | 5 | 5 |
| 5   | 3 | 5 | 5 | 3 | 1 | 4 | 5 | 1 |
| 5   | 4 | 5 | 3 | 1 | 1 | 5 | 5 | 5 |
| 4   | 5 | 5 | 3 | 1 | 2 | 5 | 5 | 5 |
| 3   | 2 | 4 | 2 | 5 | 2 | 3 | 3 | 3 |
| 3   | 3 | 4 | 3 | 2 | 2 | 4 | 4 | 2 |
| 4   | 4 | 5 | 5 | 2 | 2 | 4 | 5 | 5 |
| 4   | 4 | 5 | 5 | 2 | 1 | 5 | 5 | 5 |
| 3   | 2 | 4 | 4 | 3 | 1 | 4 | 5 | 5 |
| 4   | 3 | 4 | 5 | 2 | 2 | 4 | 4 | 4 |
| 5   | 4 | 5 | 5 | 4 | 2 | 5 | 5 | 5 |
| 4   | 3 | 4 | 4 | 5 | 3 | 4 | 4 | 4 |
| 4   | 4 | 5 | 5 | 2 | 1 | 4 | 5 | 4 |
| 4   | 2 | 5 | 4 | 3 | 1 | 4 | 4 | 4 |
| 5   | 4 | 5 | 4 | 2 | 1 | 5 | 5 | 2 |
| 4   | 5 | 4 | 3 | 2 | 2 | 4 | 5 | 5 |
| 4   | 3 | 5 | 3 | 2 | 1 | 5 | 5 | 5 |
| 5   | 5 | 5 | 5 | 1 | 1 | 4 | 5 | 5 |
| 5   | 4 | 5 | 4 | 1 | 1 | 5 | 5 | 5 |
| 5   | 4 | 5 | 5 | 1 | 1 | 5 | 5 | 5 |
| 4   | 3 | 4 | 5 | 3 | 2 | 4 | 4 | 4 |
| 5   | 4 | 5 | 3 | 1 | 1 | 5 | 5 | 4 |
| 4   | 4 | 5 | 5 | 1 | 1 | 5 | 5 | 5 |
| 4   | 4 | 5 | 5 | 1 | 1 | 5 | 5 | 5 |
| 5   | 4 | 5 | 5 | 1 | 1 | 5 | 5 | 5 |
| 4   | 3 | 4 | 4 | 4 | 2 | 5 | 5 | 5 |
| 3   | 3 | 4 | 4 | 3 | 1 | 5 | 5 | 5 |
| 5   | 5 | 5 | 4 | 3 | 1 | 5 | 5 | 5 |



|   |   |   |   |     |   |   |     |   |
|---|---|---|---|-----|---|---|-----|---|
| 4 | 3 | 4 | 3 | 3   | 1 | 5 | 4   | 5 |
| 5 | 1 | 5 | 5 | 1   | 3 | 3 | 5   | 2 |
| 3 | 4 | 5 | 3 | 2   | 2 | 5 | 4   | 5 |
| 3 | 3 | 5 | 3 | 2   | 3 | 4 | 4   | 5 |
| 3 | 4 | 5 | 4 | 2   | 4 | 3 | 4   | 5 |
| 4 | 4 | 5 | 3 | 1   | 1 | 4 | 4   | 3 |
| 4 | 4 | 5 | 5 | 1   | 1 | 4 | 5   | 4 |
| 5 | 5 | 5 | 5 | 2   | 1 | 5 | 5   | 5 |
| 3 | 2 | 4 | 4 | 4   | 3 | 5 | 4   | 4 |
| 4 | 5 | 5 | 3 | 1   | 1 | 4 | 4   | 5 |
| 5 | 5 | 5 | 5 | 1   | 1 | 5 | 5   | 5 |
| 4 | 3 | 5 | 5 | 3   | 1 | 5 | 5   | 5 |
| 4 | 5 | 5 | 5 | 2   | 2 | 5 | 5   | 4 |
| 3 | 2 | 4 | 3 | 2   | 2 | 4 | 5   | 5 |
| 4 | 2 | 4 | 5 | 3   | 2 | 4 | 4   | 4 |
| 4 | 4 | 5 | 2 | 3   | 1 | 5 | 5   | 5 |
| 4 | 3 | 5 | 4 | 2   | 1 | 5 | 5   | 5 |
| 5 | 3 | 5 | 5 | 1   | 1 | 5 | 5   | 5 |
| 5 | 1 | 5 | 2 | 1   | 1 | 4 | 5   | 4 |
| 4 | 3 | 4 | 4 | 999 | 2 | 5 | 4   | 5 |
| 4 | 4 | 5 | 4 | 1   | 2 | 4 | 4   | 3 |
| 4 | 5 | 4 | 4 | 3   | 2 | 4 | 5   | 3 |
| 4 | 3 | 5 | 3 | 3   | 2 | 5 | 4   | 4 |
| 5 | 5 | 5 | 4 | 1   | 1 | 5 | 5   | 5 |
| 4 | 3 | 5 | 3 | 2   | 1 | 4 | 5   | 5 |
| 4 | 3 | 5 | 2 | 2   | 2 | 4 | 4   | 4 |
| 4 | 5 | 5 | 5 | 2   | 2 | 5 | 5   | 5 |
| 5 | 4 | 5 | 5 | 4   | 1 | 5 | 5   | 5 |
| 3 | 4 | 5 | 5 | 4   | 2 | 5 | 5   | 4 |
| 4 | 4 | 5 | 4 | 2   | 1 | 4 | 5   | 5 |
| 4 | 3 | 4 | 5 | 4   | 1 | 5 | 5   | 5 |
| 3 | 1 | 5 | 4 | 3   | 3 | 2 | 5   | 4 |
| 4 | 3 | 5 | 5 | 2   | 2 | 4 | 5   | 4 |
| 4 | 4 | 5 | 5 | 2   | 2 | 5 | 4   | 4 |
| 4 | 4 | 5 | 5 | 3   | 2 | 4 | 999 | 4 |
| 4 | 5 | 4 | 5 | 3   | 3 | 4 | 4   | 3 |
| 3 | 4 | 3 | 4 | 4   | 2 | 3 | 3   | 4 |
| 3 | 2 | 3 | 4 | 2   | 3 | 3 | 5   | 4 |
| 3 | 5 | 5 | 5 | 3   | 2 | 4 | 5   | 5 |
| 3 | 3 | 5 | 3 | 3   | 3 | 5 | 4   | 3 |
| 5 | 4 | 5 | 5 | 2   | 1 | 5 | 5   | 5 |
| 3 | 5 | 5 | 4 | 1   | 4 | 5 | 3   | 5 |
| 3 | 4 | 5 | 3 | 3   | 1 | 4 | 4   | 3 |
| 5 | 5 | 5 | 3 | 1   | 2 | 1 | 5   | 5 |
| 4 | 2 | 4 | 2 | 3   | 2 | 3 | 5   | 5 |
| 1 | 2 | 2 | 2 | 4   | 3 | 2 | 2   | 1 |
| 4 | 4 | 3 | 5 | 4   | 2 | 3 | 4   | 5 |
| 3 | 2 | 5 | 3 | 2   | 3 | 4 | 3   | 3 |
| 4 | 3 | 5 | 4 | 2   | 2 | 5 | 5   | 4 |
| 2 | 2 | 4 | 5 | 4   | 3 | 2 | 4   | 4 |

|   |   |   |   |   |   |   |   |   |
|---|---|---|---|---|---|---|---|---|
| 3 | 4 | 5 | 5 | 1 | 3 | 5 | 5 | 5 |
| 4 | 4 | 5 | 3 | 2 | 2 | 4 | 5 | 5 |
| 4 | 4 | 5 | 3 | 3 | 2 | 5 | 4 | 1 |
| 2 | 2 | 4 | 3 | 3 | 3 | 3 | 3 | 4 |
| 4 | 4 | 4 | 4 | 2 | 2 | 4 | 4 | 4 |
| 4 | 4 | 4 | 4 | 2 | 3 | 5 | 4 | 5 |
| 4 | 4 | 5 | 4 | 1 | 1 | 5 | 4 | 5 |
| 5 | 5 | 4 | 2 | 3 | 1 | 5 | 4 | 4 |
| 4 | 4 | 5 | 5 | 4 | 2 | 4 | 5 | 4 |
| 3 | 2 | 5 | 4 | 4 | 4 | 3 | 4 | 4 |
| 4 | 4 | 5 | 4 | 3 | 1 | 4 | 5 | 5 |
| 4 | 4 | 5 | 4 | 3 | 2 | 4 | 4 | 4 |
| 5 | 5 | 5 | 5 | 1 | 1 | 5 | 5 | 5 |
| 4 | 4 | 5 | 4 | 3 | 2 | 4 | 5 | 5 |
| 4 | 4 | 5 | 4 | 3 | 1 | 5 | 5 | 5 |
| 5 | 5 | 5 | 5 | 3 | 1 | 4 | 5 | 5 |
| 4 | 2 | 2 | 2 | 1 | 3 | 3 | 4 | 5 |
| 3 | 3 | 4 | 5 | 5 | 4 | 4 | 5 | 3 |
| 5 | 4 | 5 | 5 | 3 | 1 | 5 | 5 | 5 |
| 1 | 1 | 3 | 3 | 5 | 3 | 3 | 2 | 3 |
| 4 | 5 | 5 | 5 | 2 | 1 | 4 | 5 | 5 |
| 5 | 5 | 5 | 4 | 1 | 1 | 4 | 4 | 3 |
| 4 | 5 | 4 | 5 | 3 | 2 | 4 | 5 | 4 |
| 4 | 3 | 5 | 2 | 2 | 1 | 5 | 5 | 4 |
| 4 | 4 | 5 | 3 | 2 | 2 | 4 | 5 | 5 |
| 4 | 4 | 4 | 5 | 2 | 1 | 4 | 4 | 5 |
| 4 | 4 | 5 | 4 | 4 | 2 | 5 | 5 | 5 |
| 4 | 3 | 4 | 5 | 2 | 2 | 5 | 4 | 4 |
| 4 | 5 | 5 | 3 | 2 | 3 | 4 | 4 | 5 |
| 3 | 5 | 4 | 3 | 2 | 3 | 5 | 4 | 4 |
| 4 | 3 | 5 | 3 | 3 | 1 | 4 | 5 | 5 |
| 5 | 5 | 5 | 5 | 3 | 1 | 5 | 5 | 5 |
| 4 | 4 | 5 | 3 | 2 | 1 | 5 | 5 | 5 |
| 4 | 5 | 4 | 5 | 2 | 2 | 4 | 5 | 4 |
| 4 | 3 | 5 | 3 | 2 | 1 | 4 | 5 | 5 |
| 3 | 3 | 4 | 2 | 2 | 2 | 5 | 4 | 4 |
| 4 | 3 | 5 | 5 | 3 | 2 | 5 | 5 | 5 |
| 3 | 2 | 4 | 4 | 3 | 1 | 4 | 5 | 4 |
| 4 | 4 | 4 | 4 | 3 | 2 | 4 | 4 | 5 |
| 4 | 3 | 5 | 3 | 1 | 1 | 4 | 4 | 5 |
| 4 | 5 | 5 | 1 | 1 | 1 | 5 | 5 | 5 |
| 4 | 4 | 5 | 3 | 1 | 1 | 4 | 4 | 5 |
| 3 | 2 | 5 | 2 | 2 | 2 | 3 | 5 | 4 |
| 4 | 3 | 5 | 3 | 2 | 1 | 4 | 4 | 3 |
| 3 | 3 | 3 | 2 | 3 | 3 | 3 | 3 | 3 |
| 3 | 4 | 5 | 4 | 3 | 2 | 3 | 5 | 4 |
| 4 | 5 | 5 | 5 | 4 | 2 | 5 | 5 | 5 |
| 3 | 3 | 5 | 4 | 2 | 2 | 4 | 4 | 4 |
| 3 | 3 | 5 | 3 | 2 | 2 | 5 | 5 | 5 |
| 5 | 5 | 5 | 3 | 2 | 1 | 5 | 5 | 1 |

|   |     |   |     |   |   |     |   |   |
|---|-----|---|-----|---|---|-----|---|---|
| 5 | 5   | 5 | 4   | 1 | 1 | 4   | 4 | 4 |
| 4 | 4   | 4 | 4   | 3 | 3 | 4   | 5 | 5 |
| 4 | 5   | 4 | 5   | 2 | 1 | 4   | 4 | 4 |
| 4 | 5   | 5 | 5   | 2 | 2 | 5   | 5 | 5 |
| 4 | 4   | 5 | 5   | 2 | 1 | 5   | 4 | 4 |
| 4 | 4   | 5 | 4   | 1 | 3 | 5   | 5 | 4 |
| 5 | 4   | 5 | 2   | 5 | 1 | 5   | 5 | 1 |
| 4 | 4   | 4 | 4   | 3 | 2 | 4   | 5 | 5 |
| 5 | 3   | 3 | 4   | 4 | 1 | 5   | 5 | 5 |
| 4 | 3   | 5 | 4   | 4 | 4 | 3   | 4 | 3 |
| 4 | 2   | 3 | 5   | 3 | 2 | 4   | 5 | 4 |
| 5 | 2   | 5 | 5   | 3 | 1 | 5   | 5 | 5 |
| 3 | 4   | 3 | 5   | 3 | 3 | 4   | 4 | 3 |
| 4 | 3   | 5 | 4   | 3 | 1 | 3   | 5 | 3 |
| 4 | 3   | 4 | 5   | 3 | 2 | 3   | 4 | 1 |
| 2 | 4   | 5 | 3   | 2 | 1 | 4   | 2 | 5 |
| 4 | 2   | 4 | 3   | 1 | 1 | 4   | 5 | 5 |
| 5 | 3   | 4 | 2   | 3 | 2 | 5   | 5 | 1 |
| 4 | 5   | 5 | 4   | 4 | 2 | 4   | 5 | 5 |
| 5 | 4   | 4 | 5   | 2 | 2 | 3   | 5 | 4 |
| 4 | 3   | 5 | 5   | 1 | 1 | 4   | 5 | 5 |
| 4 | 999 | 5 | 2   | 1 | 1 | 2   | 5 | 5 |
| 4 | 2   | 5 | 2   | 1 | 1 | 4   | 5 | 5 |
| 4 | 3   | 5 | 3   | 2 | 1 | 3   | 5 | 4 |
| 3 | 1   | 3 | 999 | 1 | 1 | 2   | 2 | 2 |
| 4 | 5   | 5 | 3   | 2 | 1 | 4   | 5 | 4 |
| 4 | 2   | 5 | 5   | 1 | 1 | 5   | 5 | 1 |
| 3 | 2   | 3 | 3   | 2 | 4 | 999 | 3 | 4 |
| 2 | 1   | 5 | 1   | 1 | 1 | 999 | 1 | 1 |
| 5 | 3   | 5 | 5   | 1 | 1 | 5   | 5 | 1 |
| 4 | 2   | 5 | 4   | 1 | 1 | 3   | 5 | 5 |
| 3 | 1   | 3 | 2   | 3 | 2 | 3   | 3 | 3 |
| 3 | 4   | 5 | 5   | 4 | 1 | 3   | 5 | 5 |
| 4 | 3   | 5 | 1   | 5 | 1 | 4   | 5 | 3 |
| 5 | 1   | 5 | 3   | 3 | 1 | 5   | 5 | 3 |
| 4 | 5   | 5 | 5   | 5 | 1 | 5   | 5 | 4 |
| 3 | 2   | 4 | 3   | 2 | 2 | 4   | 4 | 3 |
| 3 | 1   | 3 | 3   | 3 | 2 | 3   | 4 | 3 |
| 4 | 3   | 4 | 3   | 2 | 2 | 3   | 3 | 5 |
| 2 | 5   | 4 | 5   | 5 | 1 | 5   | 5 | 4 |
| 4 | 2   | 4 | 5   | 3 | 1 | 4   | 4 | 3 |
| 5 | 4   | 5 | 4   | 2 | 1 | 4   | 5 | 5 |
| 5 | 3   | 5 | 4   | 1 | 1 | 4   | 4 | 4 |
| 4 | 3   | 5 | 2   | 1 | 1 | 4   | 5 | 5 |
| 4 | 4   | 5 | 5   | 3 | 2 | 4   | 5 | 5 |
| 5 | 2   | 4 | 1   | 5 | 5 | 3   | 5 | 5 |
| 5 | 1   | 5 | 5   | 1 | 1 | 5   | 5 | 1 |
| 3 | 3   | 3 | 3   | 2 | 2 | 3   | 3 | 4 |
| 5 | 5   | 3 | 4   | 3 | 2 | 3   | 2 | 4 |
| 3 | 1   | 5 | 5   | 1 | 1 | 4   | 5 | 5 |

|     |   |     |     |     |   |   |   |   |
|-----|---|-----|-----|-----|---|---|---|---|
| 4   | 3 | 4   | 4   | 2   | 3 | 4 | 4 | 1 |
| 4   | 1 | 5   | 4   | 4   | 1 | 4 | 5 | 5 |
| 2   | 1 | 2   | 2   | 2   | 3 | 3 | 4 | 2 |
| 2   | 2 | 3   | 5   | 3   | 4 | 3 | 2 | 4 |
| 3   | 2 | 5   | 4   | 3   | 3 | 3 | 3 | 4 |
| 3   | 3 | 3   | 4   | 2   | 1 | 3 | 3 | 5 |
| 1   | 5 | 5   | 5   | 3   | 1 | 5 | 5 | 5 |
| 5   | 5 | 5   | 5   | 1   | 1 | 5 | 5 | 5 |
| 5   | 3 | 5   | 3   | 2   | 1 | 5 | 5 | 5 |
| 4   | 3 | 5   | 3   | 3   | 2 | 4 | 4 | 5 |
| 4   | 1 | 5   | 2   | 1   | 3 | 2 | 3 | 5 |
| 5   | 3 | 5   | 4   | 2   | 2 | 4 | 5 | 4 |
| 4   | 4 | 5   | 5   | 2   | 2 | 4 | 4 | 5 |
| 5   | 2 | 5   | 1   | 2   | 1 | 4 | 5 | 5 |
| 4   | 3 | 3   | 5   | 2   | 4 | 5 | 5 | 4 |
| 5   | 4 | 5   | 4   | 2   | 1 | 5 | 4 | 5 |
| 4   | 2 | 5   | 2   | 1   | 1 | 3 | 5 | 5 |
| 4   | 3 | 5   | 4   | 3   | 1 | 4 | 5 | 5 |
| 5   | 4 | 5   | 2   | 1   | 1 | 5 | 5 | 5 |
| 5   | 5 | 4   | 4   | 2   | 1 | 4 | 4 | 5 |
| 4   | 3 | 5   | 5   | 1   | 1 | 4 | 5 | 5 |
| 5   | 1 | 5   | 5   | 3   | 1 | 4 | 5 | 4 |
| 2   | 4 | 5   | 5   | 3   | 1 | 5 | 5 | 4 |
| 4   | 4 | 5   | 2   | 1   | 2 | 4 | 5 | 5 |
| 3   | 3 | 5   | 5   | 5   | 1 | 2 | 4 | 3 |
| 5   | 5 | 5   | 1   | 1   | 1 | 5 | 5 | 5 |
| 5   | 5 | 5   | 5   | 3   | 1 | 4 | 5 | 5 |
| 5   | 4 | 5   | 5   | 1   | 1 | 5 | 5 | 4 |
| 4   | 4 | 4   | 4   | 4   | 1 | 3 | 4 | 4 |
| 4   | 4 | 5   | 2   | 1   | 1 | 5 | 5 | 4 |
| 5   | 4 | 5   | 3   | 2   | 1 | 5 | 5 | 5 |
| 5   | 4 | 5   | 3   | 1   | 1 | 5 | 5 | 5 |
| 5   | 3 | 5   | 4   | 5   | 1 | 4 | 5 | 5 |
| 4   | 4 | 5   | 4   | 3   | 2 | 4 | 4 | 1 |
| 999 | 4 | 4   | 3   | 5   | 1 | 4 | 4 | 5 |
| 4   | 3 | 5   | 4   | 1   | 1 | 5 | 5 | 5 |
| 2   | 3 | 999 | 999 | 999 | 3 | 4 | 2 | 5 |
| 4   | 2 | 5   | 3   | 1   | 1 | 5 | 4 | 5 |
| 2   | 3 | 4   | 3   | 1   | 1 | 4 | 5 | 4 |
| 5   | 1 | 5   | 1   | 1   | 1 | 4 | 5 | 5 |
| 5   | 5 | 5   | 5   | 3   | 1 | 5 | 5 | 5 |
| 3   | 2 | 5   | 4   | 2   | 1 | 5 | 5 | 5 |
| 4   | 5 | 4   | 3   | 4   | 1 | 1 | 5 | 5 |
| 2   | 3 | 5   | 4   | 3   | 1 | 4 | 3 | 2 |
| 4   | 2 | 4   | 3   | 4   | 1 | 4 | 4 | 4 |
| 4   | 3 | 5   | 3   | 1   | 1 | 5 | 5 | 5 |
| 3   | 2 | 4   | 5   | 3   | 2 | 3 | 5 | 4 |
| 4   | 3 | 5   | 4   | 5   | 1 | 4 | 5 | 5 |
| 4   | 3 | 4   | 5   | 2   | 3 | 3 | 4 | 3 |
| 5   | 4 | 5   | 5   | 1   | 1 | 3 | 1 | 5 |

|     |   |   |   |     |   |   |   |   |
|-----|---|---|---|-----|---|---|---|---|
| 1   | 1 | 1 | 1 | 1   | 5 | 1 | 5 | 5 |
| 4   | 5 | 5 | 3 | 2   | 1 | 4 | 5 | 5 |
| 3   | 2 | 4 | 1 | 5   | 2 | 4 | 4 | 2 |
| 5   | 5 | 5 | 4 | 1   | 1 | 5 | 5 | 5 |
| 4   | 2 | 5 | 3 | 2   | 1 | 4 | 4 | 1 |
| 3   | 3 | 4 | 4 | 2   | 2 | 3 | 5 | 4 |
| 3   | 1 | 1 | 3 | 3   | 3 | 1 | 5 | 1 |
| 5   | 3 | 5 | 3 | 2   | 1 | 4 | 5 | 5 |
| 4   | 2 | 5 | 4 | 3   | 2 | 5 | 3 | 5 |
| 4   | 5 | 5 | 4 | 3   | 1 | 3 | 5 | 5 |
| 4   | 3 | 4 | 3 | 3   | 1 | 5 | 5 | 5 |
| 5   | 4 | 5 | 5 | 2   | 1 | 5 | 5 | 5 |
| 3   | 3 | 3 | 3 | 2   | 3 | 4 | 2 | 2 |
| 5   | 5 | 5 | 4 | 1   | 1 | 5 | 5 | 5 |
| 5   | 4 | 5 | 4 | 3   | 1 | 4 | 5 | 5 |
| 4   | 4 | 5 | 1 | 1   | 1 | 5 | 5 | 5 |
| 4   | 5 | 5 | 4 | 3   | 1 | 5 | 5 | 4 |
| 3   | 2 | 3 | 2 | 2   | 2 | 4 | 5 | 4 |
| 4   | 4 | 5 | 4 | 1   | 2 | 3 | 4 | 4 |
| 4   | 5 | 4 | 4 | 3   | 2 | 4 | 5 | 4 |
| 3   | 3 | 5 | 4 | 4   | 1 | 3 | 5 | 4 |
| 2   | 3 | 2 | 4 | 3   | 3 | 4 | 4 | 5 |
| 4   | 2 | 5 | 4 | 3   | 2 | 4 | 5 | 3 |
| 5   | 4 | 5 | 5 | 4   | 2 | 3 | 5 | 5 |
| 3   | 2 | 4 | 5 | 2   | 1 | 3 | 4 | 3 |
| 4   | 4 | 4 | 4 | 1   | 1 | 4 | 4 | 4 |
| 4   | 4 | 5 | 4 | 2   | 1 | 4 | 4 | 4 |
| 4   | 3 | 4 | 5 | 2   | 3 | 4 | 5 | 3 |
| 3   | 4 | 5 | 3 | 2   | 1 | 4 | 5 | 4 |
| 3   | 4 | 5 | 3 | 2   | 1 | 3 | 5 | 5 |
| 999 | 5 | 3 | 4 | 2   | 3 | 4 | 3 | 3 |
| 5   | 2 | 5 | 4 | 1   | 1 | 5 | 5 | 5 |
| 4   | 4 | 5 | 3 | 1   | 1 | 5 | 5 | 4 |
| 4   | 3 | 5 | 5 | 999 | 1 | 5 | 5 | 5 |
| 4   | 4 | 5 | 4 | 3   | 1 | 4 | 4 | 4 |
| 4   | 4 | 5 | 3 | 2   | 2 | 5 | 5 | 5 |
| 4   | 1 | 5 | 4 | 1   | 1 | 5 | 5 | 5 |
| 4   | 5 | 4 | 3 | 2   | 2 | 4 | 4 | 5 |
| 3   | 2 | 4 | 5 | 2   | 1 | 3 | 4 | 4 |
| 3   | 3 | 3 | 4 | 3   | 2 | 3 | 3 | 3 |
| 4   | 3 | 4 | 2 | 1   | 1 | 4 | 5 | 4 |
| 5   | 3 | 5 | 4 | 3   | 1 | 4 | 5 | 5 |
| 3   | 2 | 5 | 1 | 1   | 1 | 4 | 5 | 5 |
| 5   | 4 | 5 | 3 | 2   | 1 | 5 | 5 | 5 |
| 5   | 5 | 5 | 5 | 1   | 1 | 5 | 5 | 5 |
| 2   | 3 | 3 | 5 | 1   | 1 | 3 | 4 | 5 |
| 2   | 2 | 3 | 2 | 4   | 3 | 2 | 3 | 4 |
| 5   | 3 | 4 | 3 | 5   | 4 | 2 | 3 | 4 |
| 4   | 3 | 5 | 3 | 2   | 1 | 4 | 5 | 4 |
| 4   | 3 | 5 | 5 | 2   | 1 | 5 | 5 | 4 |

|     |     |   |     |     |     |     |   |   |
|-----|-----|---|-----|-----|-----|-----|---|---|
| 4   | 4   | 5 | 4   | 3   | 2   | 4   | 5 | 4 |
| 3   | 3   | 4 | 4   | 2   | 3   | 4   | 4 | 4 |
| 5   | 4   | 4 | 5   | 3   | 2   | 4   | 5 | 5 |
| 3   | 2   | 4 | 3   | 1   | 1   | 4   | 5 | 5 |
| 3   | 3   | 5 | 3   | 3   | 3   | 4   | 3 | 3 |
| 5   | 5   | 5 | 5   | 1   | 1   | 5   | 5 | 5 |
| 3   | 2   | 2 | 3   | 2   | 999 | 3   | 1 | 2 |
| 4   | 4   | 5 | 2   | 3   | 1   | 3   | 5 | 5 |
| 4   | 2   | 5 | 3   | 2   | 2   | 4   | 5 | 5 |
| 2   | 1   | 4 | 2   | 5   | 3   | 4   | 3 | 3 |
| 5   | 5   | 5 | 5   | 1   | 1   | 5   | 5 | 5 |
| 5   | 4   | 5 | 5   | 1   | 1   | 5   | 5 | 5 |
| 4   | 4   | 3 | 2   | 3   | 2   | 3   | 4 | 4 |
| 4   | 3   | 5 | 4   | 2   | 1   | 4   | 4 | 3 |
| 3   | 3   | 2 | 2   | 3   | 2   | 3   | 3 | 3 |
| 3   | 999 | 5 | 3   | 3   | 1   | 999 | 5 | 5 |
| 3   | 2   | 5 | 3   | 2   | 1   | 2   | 5 | 4 |
| 4   | 5   | 4 | 3   | 1   | 1   | 5   | 5 | 5 |
| 4   | 3   | 5 | 999 | 3   | 999 | 3   | 5 | 5 |
| 3   | 2   | 4 | 4   | 1   | 1   | 5   | 5 | 5 |
| 5   | 5   | 5 | 5   | 1   | 1   | 5   | 5 | 5 |
| 4   | 1   | 5 | 3   | 3   | 1   | 3   | 4 | 4 |
| 3   | 3   | 4 | 2   | 1   | 2   | 4   | 5 | 3 |
| 5   | 3   | 5 | 1   | 2   | 1   | 3   | 2 | 5 |
| 4   | 5   | 5 | 3   | 5   | 1   | 5   | 5 | 5 |
| 3   | 1   | 5 | 3   | 2   | 1   | 4   | 4 | 3 |
| 4   | 3   | 4 | 2   | 2   | 1   | 4   | 4 | 5 |
| 4   | 4   | 5 | 5   | 2   | 1   | 4   | 5 | 4 |
| 4   | 3   | 5 | 4   | 2   | 1   | 5   | 5 | 4 |
| 4   | 3   | 4 | 5   | 1   | 1   | 4   | 5 | 4 |
| 4   | 5   | 5 | 3   | 1   | 1   | 5   | 5 | 5 |
| 5   | 5   | 5 | 2   | 5   | 1   | 5   | 5 | 4 |
| 4   | 4   | 5 | 4   | 1   | 1   | 5   | 5 | 5 |
| 3   | 2   | 4 | 3   | 3   | 4   | 2   | 5 | 2 |
| 4   | 3   | 5 | 4   | 1   | 1   | 4   | 5 | 4 |
| 4   | 4   | 5 | 4   | 999 | 1   | 5   | 5 | 5 |
| 999 | 4   | 4 | 5   | 2   | 2   | 4   | 5 | 5 |
| 5   | 3   | 5 | 4   | 2   | 5   | 4   | 5 | 5 |
| 3   | 2   | 5 | 2   | 3   | 2   | 2   | 4 | 3 |
| 4   | 5   | 3 | 2   | 4   | 1   | 3   | 2 | 4 |
| 3   | 3   | 4 | 3   | 4   | 4   | 3   | 3 | 4 |
| 4   | 2   | 4 | 5   | 4   | 1   | 4   | 5 | 5 |
| 4   | 2   | 5 | 3   | 1   | 2   | 4   | 5 | 5 |
| 5   | 5   | 5 | 1   | 2   | 1   | 5   | 5 | 5 |
| 5   | 4   | 5 | 4   | 3   | 1   | 4   | 4 | 5 |
| 4   | 3   | 5 | 4   | 1   | 1   | 3   | 5 | 4 |
| 5   | 4   | 5 | 4   | 1   | 1   | 4   | 5 | 5 |
| 4   | 3   | 3 | 3   | 2   | 2   | 3   | 3 | 3 |
| 4   | 3   | 4 | 3   | 2   | 2   | 3   | 4 | 5 |
| 2   | 1   | 4 | 5   | 1   | 2   | 4   | 2 | 5 |

|   |   |     |   |   |     |   |     |   |
|---|---|-----|---|---|-----|---|-----|---|
| 4 | 5 | 999 | 4 | 2 | 1   | 5 | 5   | 4 |
| 4 | 4 | 5   | 4 | 1 | 1   | 4 | 5   | 5 |
| 5 | 4 | 5   | 5 | 3 | 1   | 5 | 5   | 5 |
| 3 | 4 | 4   | 3 | 2 | 1   | 4 | 4   | 4 |
| 3 | 1 | 5   | 3 | 3 | 1   | 4 | 4   | 3 |
| 4 | 3 | 4   | 5 | 3 | 2   | 5 | 4   | 4 |
| 4 | 4 | 4   | 4 | 3 | 1   | 5 | 5   | 5 |
| 3 | 2 | 4   | 5 | 2 | 1   | 3 | 4   | 3 |
| 2 | 3 | 5   | 4 | 1 | 1   | 4 | 5   | 1 |
| 4 | 4 | 4   | 5 | 2 | 2   | 5 | 5   | 5 |
| 4 | 3 | 5   | 3 | 2 | 1   | 5 | 3   | 5 |
| 5 | 4 | 5   | 3 | 1 | 2   | 5 | 5   | 5 |
| 5 | 2 | 5   | 3 | 5 | 1   | 5 | 5   | 4 |
| 2 | 1 | 5   | 4 | 3 | 3   | 3 | 3   | 4 |
| 5 | 3 | 5   | 4 | 2 | 1   | 4 | 4   | 5 |
| 4 | 2 | 5   | 4 | 2 | 1   | 3 | 4   | 3 |
| 3 | 4 | 4   | 4 | 3 | 2   | 4 | 5   | 5 |
| 3 | 3 | 5   | 3 | 2 | 1   | 4 | 4   | 4 |
| 3 | 2 | 3   | 3 | 4 | 3   | 3 | 3   | 3 |
| 3 | 3 | 5   | 5 | 3 | 1   | 4 | 4   | 5 |
| 5 | 5 | 5   | 5 | 1 | 1   | 5 | 5   | 5 |
| 5 | 5 | 5   | 5 | 1 | 1   | 5 | 5   | 5 |
| 5 | 4 | 5   | 3 | 1 | 1   | 5 | 4   | 5 |
| 3 | 2 | 4   | 3 | 2 | 2   | 3 | 3   | 4 |
| 4 | 2 | 5   | 4 | 1 | 2   | 3 | 4   | 5 |
| 4 | 2 | 5   | 4 | 3 | 1   | 4 | 5   | 5 |
| 4 | 2 | 5   | 3 | 5 | 1   | 5 | 5   | 5 |
| 3 | 5 | 3   | 2 | 2 | 3   | 3 | 3   | 2 |
| 4 | 1 | 4   | 3 | 3 | 2   | 4 | 4   | 4 |
| 4 | 3 | 4   | 4 | 3 | 1   | 4 | 5   | 5 |
| 4 | 2 | 3   | 2 | 1 | 2   | 3 | 5   | 4 |
| 3 | 4 | 3   | 3 | 3 | 3   | 4 | 4   | 3 |
| 4 | 2 | 5   | 4 | 2 | 2   | 4 | 5   | 4 |
| 4 | 2 | 5   | 4 | 3 | 2   | 4 | 4   | 5 |
| 3 | 3 | 4   | 4 | 3 | 3   | 4 | 5   | 3 |
| 5 | 3 | 5   | 4 | 2 | 1   | 5 | 5   | 5 |
| 3 | 1 | 5   | 2 | 4 | 1   | 4 | 3   | 4 |
| 4 | 3 | 5   | 4 | 2 | 2   | 4 | 999 | 3 |
| 5 | 2 | 5   | 3 | 2 | 1   | 5 | 5   | 5 |
| 4 | 5 | 5   | 4 | 3 | 1   | 4 | 5   | 4 |
| 4 | 5 | 5   | 3 | 3 | 1   | 5 | 5   | 4 |
| 4 | 4 | 5   | 3 | 2 | 1   | 4 | 4   | 4 |
| 4 | 1 | 4   | 5 | 1 | 2   | 3 | 4   | 4 |
| 5 | 4 | 5   | 3 | 2 | 1   | 4 | 4   | 5 |
| 3 | 3 | 4   | 4 | 3 | 2   | 4 | 5   | 5 |
| 5 | 2 | 5   | 3 | 1 | 1   | 5 | 5   | 5 |
| 5 | 4 | 5   | 5 | 1 | 1   | 4 | 5   | 5 |
| 3 | 4 | 4   | 4 | 2 | 999 | 4 | 4   | 4 |
| 3 | 2 | 4   | 2 | 2 | 2   | 5 | 5   | 5 |
| 3 | 4 | 3   | 5 | 5 | 4   | 4 | 4   | 5 |

|   |     |   |   |     |     |   |   |   |
|---|-----|---|---|-----|-----|---|---|---|
| 4 | 3   | 5 | 4 | 2   | 1   | 4 | 4 | 3 |
| 5 | 5   | 4 | 4 | 2   | 1   | 4 | 4 | 5 |
| 2 | 2   | 2 | 4 | 2   | 2   | 4 | 4 | 4 |
| 4 | 2   | 5 | 2 | 3   | 1   | 4 | 5 | 5 |
| 5 | 4   | 5 | 3 | 2   | 1   | 5 | 3 | 5 |
| 4 | 3   | 5 | 3 | 3   | 1   | 5 | 5 | 5 |
| 4 | 3   | 5 | 3 | 1   | 2   | 4 | 5 | 5 |
| 5 | 3   | 5 | 4 | 4   | 1   | 5 | 5 | 4 |
| 5 | 3   | 5 | 2 | 5   | 1   | 5 | 5 | 5 |
| 4 | 2   | 4 | 5 | 5   | 2   | 5 | 3 | 4 |
| 5 | 999 | 5 | 4 | 5   | 1   | 3 | 5 | 5 |
| 4 | 999 | 4 | 1 | 2   | 1   | 4 | 5 | 5 |
| 4 | 3   | 5 | 2 | 3   | 999 | 4 | 4 | 5 |
| 4 | 2   | 5 | 4 | 999 | 1   | 4 | 5 | 4 |
| 4 | 3   | 5 | 4 | 3   | 3   | 5 | 4 | 4 |
| 4 | 4   | 5 | 4 | 5   | 1   | 4 | 5 | 5 |
| 5 | 4   | 5 | 3 | 5   | 1   | 4 | 5 | 5 |
| 4 | 2   | 5 | 4 | 2   | 1   | 2 | 4 | 5 |
| 3 | 3   | 4 | 4 | 3   | 1   | 4 | 4 | 2 |
| 4 | 3   | 5 | 4 | 2   | 1   | 5 | 4 | 3 |
| 2 | 3   | 2 | 5 | 3   | 4   | 2 | 3 | 2 |
| 4 | 2   | 5 | 4 | 3   | 2   | 4 | 4 | 4 |
| 4 | 4   | 4 | 2 | 2   | 2   | 4 | 4 | 4 |
| 4 | 1   | 5 | 4 | 3   | 3   | 4 | 3 | 5 |
| 4 | 3   | 5 | 4 | 3   | 3   | 3 | 3 | 4 |
| 4 | 1   | 5 | 2 | 1   | 1   | 5 | 5 | 4 |
| 4 | 3   | 4 | 4 | 4   | 1   | 5 | 5 | 5 |
| 4 | 4   | 4 | 3 | 3   | 1   | 4 | 5 | 4 |
| 5 | 3   | 5 | 4 | 2   | 1   | 5 | 5 | 4 |
| 5 | 4   | 5 | 3 | 1   | 1   | 5 | 5 | 5 |
| 4 | 3   | 5 | 3 | 2   | 2   | 3 | 4 | 3 |
| 5 | 5   | 4 | 4 | 999 | 2   | 5 | 5 | 5 |
| 4 | 4   | 4 | 2 | 3   | 1   | 4 | 5 | 5 |
| 3 | 1   | 5 | 3 | 2   | 1   | 4 | 4 | 3 |
| 4 | 4   | 5 | 4 | 3   | 2   | 3 | 5 | 4 |
| 4 | 2   | 4 | 3 | 4   | 3   | 4 | 4 | 4 |
| 3 | 1   | 5 | 4 | 2   | 1   | 3 | 5 | 4 |
| 4 | 2   | 5 | 3 | 2   | 1   | 4 | 5 | 5 |
| 2 | 3   | 4 | 3 | 5   | 5   | 3 | 4 | 2 |
| 3 | 1   | 5 | 5 | 3   | 4   | 5 | 3 | 4 |
| 5 | 5   | 5 | 5 | 3   | 2   | 4 | 5 | 4 |
| 5 | 2   | 5 | 5 | 2   | 1   | 4 | 5 | 5 |
| 4 | 2   | 4 | 2 | 3   | 3   | 2 | 5 | 5 |
| 5 | 4   | 5 | 4 | 1   | 1   | 5 | 5 | 5 |
| 5 | 3   | 5 | 3 | 2   | 2   | 4 | 4 | 4 |
| 5 | 5   | 5 | 4 | 1   | 1   | 5 | 5 | 1 |
| 4 | 2   | 4 | 4 | 2   | 2   | 4 | 5 | 3 |
| 5 | 3   | 5 | 4 | 1   | 2   | 4 | 5 | 5 |
| 4 | 4   | 5 | 4 | 3   | 2   | 5 | 4 | 5 |
| 4 | 1   | 3 | 3 | 1   | 1   | 3 | 4 | 3 |



|     |     |     |     |     |     |     |     |     |
|-----|-----|-----|-----|-----|-----|-----|-----|-----|
| 4   | 2   | 5   | 4   | 2   | 2   | 3   | 4   | 5   |
| 4   | 2   | 5   | 4   | 2   | 1   | 4   | 5   | 5   |
| 4   | 3   | 5   | 4   | 2   | 1   | 4   | 4   | 5   |
| 5   | 3   | 5   | 5   | 2   | 1   | 5   | 5   | 5   |
| 4   | 2   | 4   | 4   | 3   | 2   | 3   | 5   | 5   |
| 4   | 4   | 5   | 5   | 2   | 1   | 5   | 5   | 5   |
| 4   | 3   | 5   | 4   | 3   | 2   | 4   | 5   | 2   |
| 4   | 4   | 5   | 4   | 4   | 2   | 5   | 5   | 5   |
| 1   | 4   | 5   | 4   | 3   | 1   | 5   | 5   | 5   |
| 3   | 2   | 5   | 3   | 4   | 2   | 3   | 2   | 5   |
| 3   | 3   | 5   | 2   | 2   | 3   | 4   | 3   | 4   |
| 4   | 3   | 4   | 3   | 3   | 3   | 4   | 4   | 4   |
| 4   | 4   | 5   | 4   | 2   | 2   | 4   | 4   | 4   |
| 5   | 3   | 5   | 2   | 1   | 1   | 5   | 5   | 5   |
| 3   | 4   | 5   | 4   | 3   | 3   | 4   | 3   | 5   |
| 5   | 1   | 5   | 5   | 1   | 1   | 5   | 5   | 5   |
| 4   | 2   | 5   | 3   | 3   | 2   | 4   | 5   | 3   |
| 4   | 2   | 4   | 3   | 4   | 2   | 3   | 3   | 3   |
| 4   | 3   | 5   | 5   | 2   | 2   | 5   | 5   | 4   |
| 2   | 1   | 3   | 3   | 4   | 2   | 4   | 4   | 3   |
| 4   | 2   | 5   | 2   | 1   | 2   | 3   | 4   | 5   |
| 4   | 4   | 5   | 5   | 2   | 1   | 4   | 4   | 5   |
| 3   | 2   | 5   | 5   | 3   | 1   | 3   | 5   | 5   |
| 4   | 5   | 5   | 5   | 2   | 1   | 3   | 5   | 4   |
| 4   | 3   | 4   | 3   | 4   | 1   | 4   | 5   | 4   |
| 3   | 4   | 5   | 3   | 4   | 3   | 999 | 4   | 5   |
| 999 | 999 | 999 | 999 | 999 | 999 | 999 | 999 | 999 |
| 3   | 3   | 4   | 4   | 3   | 2   | 3   | 3   | 3   |
| 4   | 2   | 3   | 3   | 3   | 2   | 3   | 3   | 4   |
| 4   | 2   | 4   | 2   | 4   | 2   | 4   | 4   | 3   |
| 5   | 1   | 5   | 5   | 4   | 2   | 5   | 5   | 5   |
| 4   | 2   | 5   | 1   | 3   | 1   | 5   | 5   | 4   |
| 3   | 5   | 5   | 4   | 1   | 1   | 3   | 4   | 2   |
| 3   | 3   | 5   | 3   | 1   | 1   | 4   | 5   | 4   |
| 4   | 3   | 4   | 2   | 2   | 1   | 5   | 4   | 4   |
| 3   | 3   | 4   | 4   | 2   | 1   | 4   | 5   | 5   |
| 4   | 5   | 5   | 3   | 3   | 1   | 5   | 5   | 5   |
| 4   | 3   | 5   | 3   | 3   | 1   | 4   | 5   | 4   |
| 5   | 2   | 5   | 4   | 2   | 1   | 4   | 5   | 5   |
| 5   | 4   | 5   | 999 | 2   | 1   | 4   | 4   | 4   |
| 4   | 4   | 5   | 4   | 2   | 1   | 4   | 5   | 4   |
| 3   | 4   | 5   | 5   | 1   | 1   | 4   | 5   | 5   |
| 4   | 1   | 5   | 2   | 2   | 1   | 4   | 4   | 5   |
| 4   | 2   | 5   | 3   | 3   | 1   | 4   | 5   | 5   |
| 4   | 5   | 3   | 4   | 3   | 1   | 3   | 3   | 4   |
| 4   | 4   | 5   | 3   | 2   | 1   | 5   | 4   | 5   |
| 4   | 3   | 5   | 2   | 2   | 1   | 5   | 5   | 5   |
| 2   | 2   | 4   | 4   | 4   | 2   | 4   | 2   | 2   |
| 5   | 1   | 5   | 4   | 3   | 2   | 4   | 5   | 5   |
| 4   | 4   | 4   | 3   | 3   | 2   | 4   | 4   | 5   |

|   |   |   |   |   |   |   |   |   |
|---|---|---|---|---|---|---|---|---|
| 4 | 4 | 5 | 4 | 1 | 1 | 4 | 5 | 5 |
| 4 | 4 | 5 | 4 | 2 | 1 | 5 | 5 | 4 |
| 4 | 4 | 5 | 3 | 2 | 2 | 4 | 4 | 4 |
| 4 | 3 | 5 | 2 | 1 | 1 | 4 | 5 | 5 |
| 4 | 3 | 5 | 4 | 2 | 1 | 5 | 5 | 4 |
| 5 | 3 | 5 | 4 | 2 | 1 | 5 | 5 | 4 |
| 4 | 4 | 5 | 3 | 3 | 2 | 4 | 5 | 5 |
| 4 | 4 | 4 | 5 | 3 | 2 | 4 | 5 | 4 |
| 4 | 2 | 4 | 4 | 2 | 1 | 2 | 4 | 4 |
| 5 | 5 | 5 | 1 | 1 | 1 | 4 | 5 | 5 |
| 5 | 5 | 5 | 4 | 1 | 1 | 5 | 5 | 5 |
| 4 | 3 | 5 | 4 | 3 | 3 | 3 | 4 | 3 |
| 5 | 5 | 5 | 3 | 1 | 1 | 4 | 5 | 5 |
| 4 | 3 | 5 | 5 | 3 | 2 | 4 | 5 | 4 |
| 4 | 3 | 4 | 3 | 3 | 2 | 4 | 4 | 4 |
| 4 | 5 | 5 | 2 | 2 | 1 | 5 | 5 | 5 |

| IPPA_A15 | IPPA_A16 | IPPA_A17 | IPPA_A18 | IPPA_A19 | IPPA_A20 | IPPA_A21 | IPPA_A22 | IPPA_A23 |
|----------|----------|----------|----------|----------|----------|----------|----------|----------|
| 5        | 5        | 5        | 1        | 5        | 5        | 5        | 2        | 1        |
| 4        | 3        | 5        | 1        | 5        | 5        | 5        | 2        | 1        |
| 4        | 3        | 4        | 1        | 5        | 4        | 4        | 2        | 2        |
| 5        | 5        | 5        | 1        | 5        | 5        | 5        | 1        | 1        |
| 4        | 2        | 3        | 2        | 3        | 4        | 3        | 5        | 1        |
| 5        | 4        | 4        | 1        | 5        | 4        | 5        | 5        | 1        |
| 4        | 4        | 5        | 1        | 4        | 5        | 5        | 1        | 1        |
| 5        | 4        | 5        | 3        | 5        | 4        | 4        | 4        | 2        |
| 3        | 4        | 5        | 1        | 3        | 5        | 5        | 2        | 3        |
| 5        | 5        | 5        | 1        | 5        | 5        | 5        | 5        | 1        |
| 999      | 2        | 3        | 5        | 2        | 1        | 3        | 4        | 2        |
| 5        | 5        | 5        | 1        | 5        | 5        | 5        | 4        | 1        |
| 4        | 999      | 4        | 2        | 999      | 999      | 999      | 2        | 999      |
| 5        | 5        | 4        | 2        | 5        | 5        | 4        | 3        | 2        |
| 5        | 5        | 5        | 1        | 5        | 5        | 5        | 3        | 1        |
| 3        | 3        | 3        | 1        | 4        | 5        | 2        | 2        | 2        |
| 5        | 4        | 5        | 1        | 5        | 5        | 5        | 2        | 1        |
| 4        | 5        | 5        | 2        | 5        | 5        | 5        | 1        | 1        |
| 2        | 3        | 2        | 2        | 3        | 5        | 3        | 3        | 5        |
| 4        | 4        | 3        | 4        | 3        | 3        | 3        | 2        | 4        |
| 5        | 5        | 5        | 1        | 5        | 5        | 5        | 1        | 1        |
| 5        | 2        | 2        | 5        | 4        | 4        | 4        | 4        | 5        |
| 5        | 5        | 3        | 1        | 5        | 5        | 4        | 5        | 2        |
| 3        | 4        | 4        | 2        | 5        | 999      | 4        | 2        | 4        |
| 4        | 3        | 5        | 2        | 4        | 5        | 5        | 4        | 1        |
| 4        | 3        | 4        | 1        | 4        | 5        | 5        | 2        | 3        |
| 5        | 4        | 4        | 2        | 5        | 5        | 4        | 3        | 2        |
| 5        | 5        | 5        | 1        | 5        | 5        | 4        | 5        | 1        |
| 2        | 2        | 3        | 1        | 4        | 5        | 4        | 5        | 1        |
| 4        | 4        | 5        | 3        | 4        | 4        | 5        | 5        | 2        |
| 5        | 999      | 5        | 2        | 5        | 5        | 5        | 1        | 1        |
| 999      | 4        | 999      | 2        | 4        | 3        | 999      | 999      | 999      |
| 5        | 5        | 5        | 3        | 5        | 5        | 5        | 3        | 1        |
| 5        | 4        | 5        | 1        | 5        | 5        | 5        | 1        | 1        |
| 5        | 4        | 5        | 3        | 4        | 5        | 4        | 3        | 2        |
| 2        | 2        | 2        | 2        | 4        | 2        | 2        | 3        | 1        |
| 2        | 2        | 2        | 2        | 4        | 5        | 4        | 4        | 4        |
| 4        | 4        | 5        | 2        | 5        | 5        | 5        | 3        | 2        |
| 4        | 4        | 4        | 3        | 4        | 4        | 4        | 4        | 2        |
| 5        | 5        | 4        | 2        | 5        | 4        | 4        | 3        | 3        |
| 4        | 4        | 5        | 1        | 5        | 5        | 4        | 1        | 2        |
| 5        | 5        | 5        | 2        | 5        | 5        | 5        | 1        | 1        |
| 2        | 2        | 3        | 2        | 2        | 3        | 2        | 2        | 4        |
| 3        | 4        | 4        | 1        | 5        | 5        | 5        | 2        | 1        |
| 5        | 3        | 4        | 2        | 4        | 4        | 4        | 3        | 2        |
| 2        | 3        | 2        | 1        | 3        | 3        | 2        | 4        | 5        |
| 5        | 5        | 5        | 1        | 5        | 5        | 4        | 1        | 1        |
| 4        | 3        | 4        | 2        | 5        | 5        | 5        | 2        | 1        |
| 3        | 3        | 4        | 1        | 5        | 5        | 4        | 3        | 1        |

|     |     |     |     |   |   |     |   |   |
|-----|-----|-----|-----|---|---|-----|---|---|
| 4   | 3   | 4   | 2   | 4 | 5 | 4   | 4 | 3 |
| 5   | 4   | 4   | 2   | 4 | 5 | 4   | 3 | 2 |
| 5   | 5   | 1   | 999 | 4 | 5 | 4   | 1 | 1 |
| 4   | 3   | 4   | 1   | 3 | 3 | 3   | 4 | 1 |
| 5   | 5   | 5   | 1   | 5 | 5 | 5   | 1 | 1 |
| 5   | 4   | 3   | 2   | 5 | 5 | 5   | 4 | 1 |
| 3   | 4   | 2   | 4   | 3 | 2 | 5   | 5 | 5 |
| 4   | 4   | 4   | 1   | 3 | 3 | 4   | 3 | 3 |
| 5   | 5   | 5   | 4   | 5 | 4 | 5   | 3 | 1 |
| 4   | 2   | 4   | 4   | 2 | 4 | 4   | 4 | 3 |
| 5   | 5   | 5   | 3   | 5 | 5 | 5   | 2 | 2 |
| 5   | 5   | 5   | 2   | 5 | 4 | 5   | 2 | 2 |
| 3   | 3   | 2   | 3   | 3 | 2 | 2   | 2 | 2 |
| 4   | 4   | 5   | 3   | 5 | 5 | 4   | 3 | 2 |
| 5   | 4   | 5   | 3   | 5 | 5 | 5   | 2 | 2 |
| 4   | 4   | 5   | 1   | 3 | 4 | 5   | 3 | 1 |
| 4   | 3   | 4   | 2   | 5 | 5 | 4   | 2 | 1 |
| 4   | 3   | 4   | 2   | 5 | 4 | 5   | 3 | 1 |
| 4   | 4   | 5   | 1   | 3 | 4 | 4   | 1 | 1 |
| 5   | 4   | 5   | 1   | 5 | 5 | 5   | 2 | 2 |
| 5   | 4   | 3   | 3   | 4 | 4 | 5   | 5 | 2 |
| 4   | 4   | 4   | 1   | 5 | 5 | 5   | 2 | 2 |
| 4   | 4   | 4   | 2   | 4 | 4 | 4   | 3 | 2 |
| 1   | 1   | 3   | 3   | 3 | 3 | 4   | 5 | 3 |
| 4   | 4   | 5   | 2   | 5 | 5 | 4   | 2 | 2 |
| 4   | 3   | 4   | 2   | 5 | 5 | 5   | 2 | 2 |
| 5   | 4   | 4   | 1   | 5 | 5 | 5   | 2 | 1 |
| 4   | 3   | 4   | 4   | 5 | 5 | 4   | 2 | 3 |
| 4   | 4   | 5   | 2   | 5 | 4 | 5   | 3 | 1 |
| 4   | 3   | 3   | 4   | 2 | 5 | 4   | 3 | 3 |
| 4   | 4   | 4   | 2   | 5 | 5 | 4   | 3 | 2 |
| 3   | 3   | 4   | 1   | 3 | 5 | 4   | 2 | 3 |
| 5   | 5   | 5   | 1   | 5 | 5 | 5   | 1 | 1 |
| 1   | 1   | 1   | 1   | 1 | 1 | 1   | 3 | 5 |
| 3   | 2   | 3   | 2   | 3 | 3 | 3   | 4 | 2 |
| 5   | 4   | 5   | 1   | 5 | 5 | 999 | 2 | 2 |
| 5   | 4   | 5   | 1   | 5 | 5 | 5   | 3 | 1 |
| 5   | 5   | 5   | 1   | 5 | 5 | 5   | 1 | 1 |
| 5   | 4   | 4   | 1   | 5 | 4 | 4   | 2 | 1 |
| 5   | 4   | 5   | 1   | 5 | 5 | 5   | 3 | 1 |
| 4   | 4   | 3   | 1   | 3 | 5 | 5   | 4 | 1 |
| 3   | 2   | 2   | 999 | 3 | 3 | 3   | 2 | 2 |
| 5   | 4   | 5   | 2   | 4 | 5 | 4   | 5 | 1 |
| 4   | 4   | 5   | 2   | 4 | 5 | 5   | 4 | 1 |
| 999 | 3   | 3   | 1   | 3 | 4 | 4   | 3 | 1 |
| 3   | 4   | 3   | 2   | 5 | 5 | 5   | 2 | 2 |
| 5   | 999 | 999 | 1   | 5 | 5 | 4   | 4 | 3 |
| 5   | 5   | 5   | 1   | 5 | 5 | 5   | 1 | 1 |
| 4   | 3   | 4   | 1   | 4 | 4 | 5   | 2 | 1 |
| 4   | 4   | 5   | 2   | 5 | 5 | 5   | 2 | 1 |

|   |     |     |   |   |   |   |   |   |
|---|-----|-----|---|---|---|---|---|---|
| 5 | 2   | 4   | 1 | 5 | 5 | 5 | 2 | 1 |
| 5 | 5   | 5   | 1 | 5 | 5 | 5 | 2 | 1 |
| 5 | 4   | 5   | 2 | 5 | 5 | 5 | 4 | 1 |
| 4 | 3   | 3   | 1 | 4 | 3 | 3 | 5 | 3 |
| 5 | 5   | 5   | 2 | 5 | 5 | 5 | 2 | 1 |
| 5 | 3   | 3   | 1 | 5 | 5 | 5 | 2 | 1 |
| 5 | 5   | 5   | 2 | 4 | 3 | 5 | 4 | 2 |
| 5 | 5   | 5   | 1 | 5 | 5 | 5 | 5 | 1 |
| 1 | 3   | 4   | 3 | 3 | 2 | 2 | 5 | 1 |
| 5 | 5   | 5   | 1 | 5 | 1 | 5 | 1 | 1 |
| 4 | 3   | 4   | 2 | 3 | 4 | 4 | 1 | 2 |
| 4 | 4   | 5   | 3 | 5 | 5 | 5 | 3 | 2 |
| 5 | 4   | 5   | 1 | 5 | 5 | 4 | 1 | 1 |
| 5 | 2   | 5   | 2 | 4 | 3 | 5 | 1 | 2 |
| 5 | 3   | 5   | 1 | 5 | 5 | 5 | 2 | 1 |
| 4 | 3   | 5   | 2 | 5 | 5 | 5 | 4 | 1 |
| 4 | 5   | 5   | 3 | 5 | 5 | 4 | 5 | 2 |
| 4 | 4   | 5   | 1 | 5 | 5 | 5 | 2 | 1 |
| 3 | 5   | 4   | 2 | 3 | 5 | 4 | 5 | 3 |
| 4 | 5   | 4   | 3 | 5 | 4 | 4 | 5 | 3 |
| 4 | 5   | 5   | 2 | 5 | 5 | 5 | 2 | 1 |
| 3 | 3   | 3   | 2 | 4 | 5 | 4 | 2 | 1 |
| 5 | 5   | 5   | 2 | 5 | 5 | 5 | 2 | 2 |
| 4 | 3   | 4   | 1 | 4 | 4 | 4 | 2 | 2 |
| 5 | 5   | 4   | 1 | 5 | 5 | 5 | 3 | 3 |
| 5 | 5   | 5   | 1 | 5 | 5 | 5 | 1 | 1 |
| 4 | 3   | 4   | 1 | 4 | 4 | 4 | 3 | 1 |
| 5 | 5   | 5   | 2 | 5 | 5 | 5 | 5 | 1 |
| 4 | 2   | 3   | 2 | 5 | 5 | 4 | 3 | 2 |
| 5 | 5   | 4   | 2 | 3 | 3 | 4 | 2 | 2 |
| 3 | 4   | 3   | 3 | 5 | 5 | 4 | 4 | 3 |
| 5 | 5   | 5   | 2 | 5 | 5 | 5 | 1 | 1 |
| 4 | 4   | 5   | 1 | 5 | 4 | 5 | 5 | 1 |
| 4 | 3   | 5   | 2 | 5 | 4 | 3 | 4 | 2 |
| 5 | 4   | 3   | 2 | 1 | 5 | 3 | 5 | 1 |
| 3 | 1   | 3   | 2 | 3 | 4 | 4 | 4 | 2 |
| 3 | 3   | 5   | 2 | 5 | 4 | 4 | 3 | 3 |
| 5 | 5   | 5   | 3 | 5 | 5 | 5 | 5 | 3 |
| 4 | 999 | 999 | 3 | 5 | 4 | 5 | 3 | 3 |
| 5 | 3   | 4   | 4 | 5 | 3 | 3 | 3 | 1 |
| 5 | 5   | 4   | 1 | 5 | 5 | 5 | 2 | 1 |
| 4 | 3   | 5   | 2 | 5 | 4 | 4 | 5 | 2 |
| 4 | 3   | 4   | 2 | 5 | 5 | 5 | 3 | 2 |
| 3 | 1   | 4   | 1 | 3 | 5 | 4 | 5 | 3 |
| 4 | 3   | 5   | 1 | 2 | 4 | 4 | 2 | 2 |
| 5 | 4   | 5   | 1 | 5 | 5 | 5 | 2 | 1 |
| 5 | 1   | 5   | 3 | 4 | 3 | 3 | 5 | 3 |
| 5 | 4   | 5   | 2 | 5 | 5 | 5 | 3 | 1 |
| 4 | 2   | 3   | 2 | 4 | 4 | 4 | 2 | 2 |
| 3 | 2   | 4   | 2 | 3 | 3 | 3 | 2 | 2 |

|   |   |     |     |   |   |   |     |   |
|---|---|-----|-----|---|---|---|-----|---|
| 4 | 3 | 4   | 999 | 4 | 5 | 5 | 1   | 1 |
| 4 | 4 | 4   | 1   | 5 | 5 | 5 | 4   | 2 |
| 4 | 3 | 5   | 1   | 4 | 5 | 5 | 4   | 1 |
| 5 | 5 | 5   | 1   | 5 | 5 | 5 | 2   | 1 |
| 2 | 4 | 5   | 1   | 5 | 5 | 5 | 4   | 1 |
| 4 | 5 | 4   | 2   | 4 | 5 | 5 | 2   | 1 |
| 3 | 2 | 4   | 3   | 3 | 4 | 3 | 3   | 4 |
| 5 | 2 | 5   | 2   | 4 | 3 | 5 | 5   | 2 |
| 5 | 3 | 5   | 2   | 5 | 5 | 4 | 3   | 1 |
| 5 | 4 | 5   | 1   | 5 | 5 | 4 | 2   | 1 |
| 3 | 3 | 5   | 2   | 4 | 3 | 4 | 3   | 1 |
| 5 | 3 | 5   | 2   | 5 | 5 | 5 | 999 | 1 |
| 3 | 4 | 3   | 2   | 2 | 3 | 3 | 3   | 3 |
| 3 | 4 | 3   | 2   | 3 | 5 | 3 | 5   | 2 |
| 4 | 3 | 4   | 2   | 4 | 4 | 3 | 1   | 2 |
| 4 | 5 | 4   | 2   | 3 | 5 | 4 | 5   | 4 |
| 3 | 4 | 4   | 3   | 5 | 5 | 4 | 3   | 1 |
| 4 | 3 | 5   | 3   | 4 | 5 | 5 | 3   | 1 |
| 4 | 4 | 5   | 3   | 5 | 4 | 5 | 3   | 3 |
| 4 | 4 | 5   | 1   | 4 | 5 | 4 | 4   | 4 |
| 3 | 2 | 4   | 2   | 5 | 4 | 5 | 5   | 3 |
| 5 | 5 | 5   | 3   | 5 | 5 | 5 | 2   | 1 |
| 5 | 5 | 5   | 1   | 5 | 5 | 5 | 2   | 1 |
| 4 | 5 | 5   | 1   | 5 | 5 | 5 | 3   | 1 |
| 5 | 5 | 5   | 1   | 5 | 5 | 5 | 3   | 1 |
| 5 | 4 | 4   | 2   | 5 | 5 | 5 | 2   | 1 |
| 5 | 4 | 4   | 2   | 4 | 4 | 5 | 3   | 2 |
| 5 | 4 | 5   | 1   | 5 | 5 | 5 | 2   | 1 |
| 4 | 4 | 5   | 3   | 5 | 4 | 5 | 4   | 3 |
| 5 | 3 | 5   | 1   | 5 | 5 | 5 | 2   | 1 |
| 5 | 5 | 5   | 2   | 4 | 5 | 5 | 3   | 1 |
| 4 | 4 | 4   | 1   | 4 | 4 | 5 | 4   | 1 |
| 5 | 5 | 3   | 1   | 5 | 5 | 3 | 2   | 2 |
| 3 | 2 | 2   | 2   | 2 | 3 | 3 | 4   | 2 |
| 3 | 4 | 999 | 3   | 3 | 3 | 4 | 4   | 3 |
| 3 | 3 | 4   | 2   | 4 | 4 | 4 | 4   | 1 |
| 5 | 4 | 5   | 2   | 5 | 5 | 4 | 2   | 2 |
| 4 | 4 | 4   | 2   | 5 | 5 | 5 | 3   | 2 |
| 5 | 3 | 5   | 1   | 5 | 5 | 5 | 2   | 1 |
| 4 | 1 | 5   | 2   | 5 | 5 | 5 | 2   | 2 |
| 4 | 2 | 3   | 3   | 4 | 5 | 5 | 4   | 3 |
| 4 | 3 | 5   | 1   | 5 | 5 | 5 | 2   | 1 |
| 4 | 4 | 4   | 2   | 4 | 4 | 5 | 1   | 1 |
| 5 | 5 | 4   | 3   | 5 | 5 | 5 | 2   | 3 |
| 4 | 5 | 4   | 1   | 4 | 3 | 5 | 4   | 2 |
| 3 | 4 | 4   | 1   | 5 | 5 | 5 | 2   | 2 |
| 5 | 3 | 4   | 2   | 4 | 4 | 4 | 3   | 2 |
| 3 | 3 | 4   | 2   | 5 | 5 | 5 | 3   | 1 |
| 4 | 3 | 4   | 2   | 5 | 5 | 4 | 3   | 1 |
| 4 | 5 | 5   | 2   | 5 | 5 | 5 | 3   | 1 |



|   |   |   |   |   |   |   |     |     |
|---|---|---|---|---|---|---|-----|-----|
| 3 | 2 | 2 | 4 | 3 | 3 | 3 | 5   | 4   |
| 2 | 2 | 4 | 3 | 4 | 4 | 2 | 3   | 4   |
| 4 | 3 | 4 | 2 | 5 | 5 | 5 | 3   | 2   |
| 4 | 4 | 5 | 2 | 5 | 5 | 5 | 2   | 1   |
| 2 | 3 | 3 | 4 | 3 | 3 | 3 | 4   | 2   |
| 4 | 5 | 5 | 2 | 5 | 5 | 4 | 5   | 1   |
| 4 | 4 | 4 | 1 | 3 | 5 | 4 | 4   | 2   |
| 5 | 5 | 5 | 1 | 5 | 5 | 5 | 2   | 1   |
| 4 | 4 | 3 | 2 | 3 | 3 | 3 | 3   | 3   |
| 3 | 2 | 3 | 4 | 2 | 2 | 4 | 5   | 5   |
| 4 | 4 | 4 | 2 | 4 | 5 | 5 | 3   | 1   |
| 3 | 2 | 4 | 1 | 3 | 4 | 4 | 4   | 2   |
| 3 | 3 | 5 | 3 | 5 | 5 | 5 | 3   | 1   |
| 4 | 5 | 5 | 3 | 5 | 5 | 5 | 4   | 2   |
| 5 | 4 | 5 | 1 | 5 | 5 | 5 | 4   | 4   |
| 5 | 4 | 5 | 2 | 5 | 5 | 5 | 2   | 2   |
| 4 | 4 | 5 | 1 | 5 | 4 | 5 | 1   | 1   |
| 4 | 3 | 5 | 2 | 5 | 5 | 5 | 3   | 1   |
| 1 | 1 | 2 | 3 | 2 | 1 | 1 | 3   | 2   |
| 3 | 3 | 4 | 3 | 4 | 4 | 5 | 5   | 5   |
| 4 | 1 | 2 | 4 | 2 | 2 | 2 | 3   | 4   |
| 4 | 4 | 5 | 2 | 5 | 5 | 5 | 2   | 1   |
| 4 | 3 | 3 | 2 | 3 | 3 | 4 | 5   | 3   |
| 5 | 5 | 5 | 1 | 4 | 5 | 5 | 2   | 1   |
| 5 | 5 | 5 | 2 | 5 | 5 | 5 | 5   | 1   |
| 3 | 3 | 3 | 2 | 3 | 4 | 4 | 4   | 3   |
| 3 | 4 | 5 | 1 | 4 | 4 | 5 | 3   | 2   |
| 3 | 2 | 3 | 3 | 3 | 3 | 3 | 3   | 3   |
| 5 | 3 | 5 | 1 | 5 | 5 | 4 | 999 | 1   |
| 4 | 2 | 4 | 1 | 5 | 4 | 5 | 5   | 1   |
| 4 | 5 | 5 | 1 | 5 | 4 | 5 | 2   | 999 |
| 3 | 2 | 3 | 3 | 3 | 3 | 3 | 3   | 3   |
| 2 | 3 | 5 | 3 | 5 | 4 | 5 | 3   | 2   |
| 3 | 3 | 5 | 3 | 5 | 4 | 4 | 3   | 2   |
| 3 | 2 | 4 | 1 | 5 | 5 | 5 | 2   | 3   |
| 3 | 3 | 4 | 3 | 3 | 3 | 4 | 5   | 2   |
| 4 | 4 | 4 | 2 | 5 | 4 | 4 | 3   | 1   |
| 5 | 1 | 5 | 1 | 5 | 5 | 5 | 1   | 1   |
| 4 | 4 | 5 | 2 | 5 | 5 | 5 | 4   | 1   |
| 5 | 5 | 5 | 2 | 5 | 5 | 5 | 2   | 1   |
| 4 | 3 | 5 | 1 | 5 | 5 | 5 | 3   | 1   |
| 4 | 4 | 5 | 1 | 5 | 5 | 5 | 4   | 1   |
| 2 | 3 | 4 | 3 | 5 | 4 | 5 | 2   | 2   |
| 3 | 4 | 5 | 2 | 5 | 4 | 4 | 3   | 2   |
| 3 | 3 | 3 | 2 | 4 | 4 | 4 | 2   | 1   |
| 3 | 2 | 4 | 4 | 3 | 4 | 4 | 3   | 2   |
| 5 | 4 | 5 | 2 | 5 | 5 | 5 | 3   | 2   |
| 4 | 4 | 5 | 2 | 5 | 5 | 5 | 3   | 1   |
| 5 | 2 | 5 | 2 | 5 | 5 | 5 | 5   | 1   |
| 4 | 4 | 4 | 2 | 4 | 4 | 4 | 4   | 2   |



|   |     |   |   |   |   |     |   |   |
|---|-----|---|---|---|---|-----|---|---|
| 5 | 3   | 5 | 2 | 5 | 5 | 5   | 2 | 2 |
| 5 | 5   | 5 | 2 | 5 | 5 | 5   | 3 | 2 |
| 2 | 1   | 2 | 3 | 3 | 3 | 4   | 5 | 3 |
| 3 | 3   | 3 | 3 | 4 | 4 | 5   | 5 | 2 |
| 4 | 999 | 5 | 4 | 3 | 3 | 2   | 2 | 4 |
| 4 | 5   | 5 | 1 | 5 | 5 | 5   | 3 | 1 |
| 3 | 4   | 5 | 2 | 4 | 5 | 5   | 4 | 2 |
| 4 | 5   | 4 | 2 | 4 | 5 | 5   | 2 | 1 |
| 5 | 5   | 4 | 1 | 5 | 4 | 5   | 2 | 1 |
| 3 | 2   | 5 | 2 | 3 | 4 | 4   | 4 | 2 |
| 4 | 4   | 4 | 1 | 5 | 5 | 4   | 3 | 2 |
| 4 | 5   | 5 | 1 | 5 | 5 | 5   | 4 | 1 |
| 3 | 3   | 5 | 2 | 4 | 4 | 5   | 3 | 2 |
| 5 | 5   | 5 | 1 | 5 | 5 | 5   | 4 | 1 |
| 5 | 5   | 2 | 5 | 5 | 5 | 5   | 4 | 1 |
| 5 | 5   | 5 | 3 | 4 | 5 | 5   | 4 | 1 |
| 4 | 5   | 5 | 1 | 5 | 5 | 5   | 4 | 1 |
| 4 | 3   | 5 | 1 | 5 | 5 | 5   | 4 | 1 |
| 3 | 3   | 4 | 2 | 5 | 5 | 5   | 2 | 2 |
| 4 | 3   | 4 | 2 | 4 | 4 | 4   | 2 | 1 |
| 3 | 2   | 5 | 2 | 5 | 5 | 5   | 2 | 2 |
| 5 | 5   | 5 | 1 | 4 | 5 | 5   | 2 | 1 |
| 4 | 5   | 5 | 1 | 5 | 5 | 5   | 2 | 2 |
| 3 | 2   | 3 | 2 | 3 | 3 | 999 | 3 | 3 |
| 3 | 4   | 5 | 1 | 5 | 5 | 5   | 3 | 2 |
| 4 | 4   | 5 | 1 | 4 | 5 | 5   | 2 | 2 |
| 3 | 3   | 2 | 3 | 4 | 3 | 2   | 5 | 4 |
| 4 | 2   | 4 | 2 | 5 | 4 | 4   | 4 | 2 |
| 4 | 4   | 5 | 2 | 5 | 5 | 4   | 4 | 2 |
| 5 | 4   | 5 | 1 | 5 | 4 | 5   | 2 | 1 |
| 3 | 3   | 3 | 3 | 3 | 4 | 3   | 3 | 2 |
| 4 | 4   | 5 | 3 | 4 | 4 | 4   | 3 | 2 |
| 5 | 5   | 5 | 3 | 5 | 5 | 4   | 4 | 2 |
| 4 | 4   | 4 | 1 | 4 | 4 | 4   | 3 | 1 |
| 3 | 4   | 5 | 2 | 5 | 5 | 5   | 4 | 1 |
| 4 | 3   | 4 | 2 | 4 | 4 | 4   | 3 | 2 |
| 4 | 5   | 5 | 1 | 4 | 5 | 5   | 2 | 1 |
| 4 | 4   | 4 | 1 | 4 | 4 | 4   | 4 | 2 |
| 4 | 4   | 4 | 2 | 4 | 4 | 4   | 2 | 1 |
| 5 | 5   | 5 | 2 | 5 | 5 | 5   | 2 | 1 |
| 4 | 4   | 5 | 2 | 5 | 5 | 5   | 3 | 1 |
| 4 | 5   | 5 | 2 | 5 | 4 | 5   | 2 | 1 |
| 4 | 4   | 4 | 2 | 4 | 3 | 4   | 3 | 2 |
| 4 | 3   | 5 | 1 | 4 | 3 | 4   | 2 | 1 |
| 4 | 4   | 5 | 2 | 5 | 5 | 5   | 1 | 1 |
| 4 | 4   | 5 | 2 | 5 | 5 | 5   | 1 | 1 |
| 5 | 5   | 5 | 1 | 5 | 5 | 5   | 2 | 1 |
| 5 | 4   | 5 | 2 | 4 | 5 | 5   | 3 | 2 |
| 5 | 4   | 3 | 1 | 4 | 3 | 4   | 5 | 3 |
| 5 | 4   | 5 | 2 | 5 | 5 | 5   | 2 | 2 |

|   |   |     |   |   |   |   |   |     |
|---|---|-----|---|---|---|---|---|-----|
| 4 | 4 | 4   | 1 | 5 | 5 | 5 | 3 | 3   |
| 2 | 2 | 2   | 3 | 2 | 4 | 3 | 4 | 2   |
| 3 | 1 | 3   | 2 | 4 | 4 | 5 | 2 | 2   |
| 4 | 3 | 4   | 2 | 4 | 4 | 3 | 2 | 3   |
| 3 | 3 | 3   | 2 | 5 | 5 | 4 | 2 | 3   |
| 4 | 3 | 5   | 2 | 4 | 4 | 4 | 3 | 2   |
| 4 | 4 | 5   | 2 | 4 | 5 | 5 | 3 | 2   |
| 5 | 5 | 5   | 1 | 5 | 5 | 5 | 2 | 1   |
| 4 | 5 | 4   | 2 | 5 | 4 | 4 | 2 | 2   |
| 5 | 2 | 4   | 2 | 5 | 4 | 5 | 3 | 1   |
| 5 | 5 | 5   | 1 | 5 | 5 | 5 | 2 | 1   |
| 4 | 5 | 5   | 1 | 4 | 5 | 4 | 2 | 2   |
| 4 | 5 | 5   | 1 | 5 | 4 | 4 | 2 | 2   |
| 4 | 4 | 4   | 2 | 2 | 5 | 4 | 1 | 2   |
| 3 | 3 | 4   | 2 | 4 | 4 | 3 | 2 | 2   |
| 4 | 3 | 5   | 2 | 5 | 5 | 5 | 2 | 1   |
| 4 | 3 | 5   | 1 | 5 | 5 | 5 | 4 | 1   |
| 5 | 4 | 5   | 1 | 5 | 5 | 5 | 2 | 1   |
| 5 | 1 | 5   | 2 | 5 | 5 | 5 | 3 | 1   |
| 4 | 4 | 999 | 3 | 4 | 5 | 4 | 2 | 2   |
| 3 | 4 | 4   | 2 | 4 | 4 | 5 | 2 | 3   |
| 4 | 3 | 5   | 2 | 5 | 5 | 4 | 4 | 2   |
| 3 | 4 | 4   | 3 | 4 | 3 | 4 | 2 | 2   |
| 5 | 5 | 5   | 1 | 5 | 5 | 5 | 2 | 1   |
| 5 | 4 | 5   | 2 | 5 | 5 | 4 | 4 | 1   |
| 4 | 3 | 4   | 2 | 4 | 4 | 3 | 2 | 2   |
| 4 | 4 | 5   | 2 | 5 | 5 | 5 | 3 | 1   |
| 4 | 3 | 4   | 2 | 5 | 5 | 4 | 4 | 2   |
| 3 | 2 | 3   | 2 | 4 | 4 | 3 | 4 | 2   |
| 4 | 5 | 5   | 2 | 4 | 5 | 4 | 1 | 1   |
| 5 | 4 | 5   | 3 | 4 | 5 | 4 | 4 | 3   |
| 2 | 2 | 3   | 4 | 3 | 3 | 3 | 5 | 2   |
| 3 | 4 | 3   | 2 | 5 | 5 | 4 | 2 | 2   |
| 5 | 4 | 4   | 2 | 5 | 5 | 4 | 4 | 1   |
| 3 | 3 | 5   | 2 | 5 | 5 | 5 | 3 | 1   |
| 3 | 3 | 4   | 2 | 4 | 4 | 4 | 4 | 2   |
| 4 | 3 | 3   | 2 | 4 | 4 | 4 | 4 | 999 |
| 5 | 3 | 4   | 1 | 3 | 4 | 4 | 4 | 3   |
| 5 | 4 | 5   | 2 | 5 | 4 | 4 | 3 | 2   |
| 3 | 3 | 4   | 2 | 3 | 4 | 5 | 5 | 3   |
| 5 | 5 | 5   | 1 | 5 | 5 | 5 | 3 | 2   |
| 4 | 3 | 3   | 2 | 2 | 2 | 3 | 4 | 1   |
| 3 | 4 | 4   | 2 | 5 | 4 | 4 | 3 | 2   |
| 5 | 4 | 5   | 1 | 4 | 5 | 4 | 3 | 1   |
| 3 | 2 | 4   | 2 | 3 | 4 | 4 | 5 | 3   |
| 1 | 1 | 2   | 2 | 1 | 2 | 3 | 5 | 4   |
| 4 | 2 | 5   | 3 | 4 | 3 | 2 | 5 | 1   |
| 4 | 3 | 4   | 2 | 3 | 4 | 5 | 2 | 1   |
| 5 | 4 | 5   | 2 | 4 | 5 | 5 | 2 | 2   |
| 3 | 2 | 3   | 1 | 3 | 4 | 4 | 5 | 2   |

|   |   |   |   |   |     |   |     |   |
|---|---|---|---|---|-----|---|-----|---|
| 3 | 5 | 5 | 2 | 5 | 5   | 5 | 3   | 1 |
| 2 | 4 | 5 | 5 | 2 | 4   | 5 | 5   | 2 |
| 5 | 4 | 5 | 1 | 5 | 5   | 5 | 2   | 1 |
| 3 | 4 | 3 | 3 | 3 | 4   | 3 | 3   | 3 |
| 5 | 5 | 5 | 2 | 4 | 4   | 5 | 3   | 2 |
| 4 | 5 | 4 | 3 | 5 | 4   | 5 | 4   | 2 |
| 5 | 5 | 5 | 1 | 5 | 5   | 5 | 3   | 1 |
| 4 | 4 | 5 | 2 | 5 | 5   | 4 | 3   | 2 |
| 4 | 5 | 5 | 2 | 5 | 4   | 5 | 5   | 2 |
| 4 | 2 | 3 | 2 | 4 | 5   | 5 | 5   | 1 |
| 5 | 4 | 5 | 1 | 5 | 5   | 4 | 2   | 1 |
| 4 | 3 | 4 | 2 | 4 | 4   | 4 | 3   | 2 |
| 5 | 5 | 5 | 2 | 5 | 5   | 5 | 3   | 1 |
| 5 | 4 | 4 | 2 | 5 | 5   | 5 | 4   | 2 |
| 5 | 3 | 5 | 3 | 4 | 5   | 5 | 5   | 2 |
| 5 | 5 | 5 | 2 | 5 | 5   | 5 | 2   | 2 |
| 4 | 4 | 4 | 1 | 4 | 5   | 5 | 999 | 2 |
| 2 | 2 | 3 | 3 | 3 | 5   | 5 | 4   | 5 |
| 5 | 5 | 5 | 1 | 5 | 5   | 5 | 4   | 2 |
| 2 | 1 | 2 | 4 | 2 | 2   | 2 | 5   | 3 |
| 5 | 4 | 5 | 2 | 5 | 5   | 5 | 3   | 2 |
| 4 | 5 | 5 | 2 | 4 | 5   | 5 | 3   | 1 |
| 4 | 3 | 3 | 2 | 4 | 5   | 5 | 5   | 2 |
| 4 | 4 | 5 | 1 | 4 | 5   | 5 | 2   | 2 |
| 4 | 4 | 5 | 2 | 4 | 5   | 5 | 3   | 2 |
| 4 | 5 | 5 | 2 | 4 | 5   | 5 | 2   | 2 |
| 4 | 4 | 5 | 2 | 5 | 5   | 5 | 4   | 2 |
| 4 | 4 | 4 | 2 | 4 | 4   | 4 | 2   | 1 |
| 4 | 3 | 5 | 1 | 3 | 4   | 3 | 3   | 2 |
| 5 | 4 | 3 | 2 | 4 | 5   | 5 | 3   | 1 |
| 5 | 3 | 4 | 1 | 5 | 999 | 5 | 3   | 1 |
| 5 | 4 | 5 | 1 | 4 | 5   | 5 | 4   | 3 |
| 5 | 5 | 5 | 1 | 5 | 5   | 5 | 2   | 1 |
| 4 | 5 | 5 | 2 | 5 | 5   | 4 | 3   | 1 |
| 3 | 4 | 5 | 2 | 5 | 5   | 4 | 4   | 1 |
| 4 | 4 | 5 | 2 | 5 | 4   | 5 | 2   | 1 |
| 5 | 4 | 5 | 2 | 5 | 4   | 5 | 4   | 2 |
| 4 | 4 | 4 | 3 | 5 | 4   | 4 | 4   | 2 |
| 5 | 4 | 4 | 2 | 4 | 4   | 5 | 3   | 2 |
| 3 | 3 | 4 | 3 | 5 | 4   | 5 | 1   | 1 |
| 5 | 5 | 5 | 3 | 5 | 5   | 5 | 3   | 1 |
| 4 | 1 | 4 | 2 | 5 | 4   | 5 | 1   | 2 |
| 3 | 3 | 3 | 2 | 4 | 5   | 3 | 4   | 2 |
| 4 | 4 | 4 | 2 | 4 | 3   | 4 | 2   | 2 |
| 3 | 3 | 3 | 3 | 3 | 3   | 3 | 4   | 3 |
| 4 | 3 | 4 | 2 | 4 | 4   | 4 | 4   | 2 |
| 5 | 3 | 3 | 1 | 5 | 5   | 5 | 4   | 3 |
| 4 | 4 | 4 | 2 | 4 | 4   | 4 | 4   | 1 |
| 3 | 3 | 5 | 2 | 5 | 5   | 5 | 2   | 2 |
| 5 | 5 | 5 | 1 | 5 | 5   | 5 | 2   | 1 |

|   |   |   |     |   |   |     |   |     |
|---|---|---|-----|---|---|-----|---|-----|
| 5 | 4 | 5 | 2   | 5 | 4 | 4   | 2 | 1   |
| 5 | 5 | 4 | 2   | 4 | 5 | 5   | 2 | 2   |
| 4 | 5 | 5 | 3   | 5 | 4 | 4   | 4 | 3   |
| 5 | 4 | 5 | 2   | 5 | 5 | 5   | 2 | 2   |
| 4 | 3 | 5 | 2   | 4 | 5 | 5   | 5 | 2   |
| 5 | 4 | 5 | 2   | 5 | 5 | 5   | 1 | 3   |
| 5 | 5 | 5 | 2   | 5 | 5 | 5   | 2 | 2   |
| 4 | 3 | 4 | 2   | 4 | 4 | 4   | 3 | 2   |
| 4 | 4 | 5 | 1   | 5 | 4 | 5   | 4 | 1   |
| 4 | 3 | 4 | 1   | 3 | 4 | 3   | 5 | 3   |
| 5 | 4 | 5 | 2   | 5 | 4 | 5   | 2 | 2   |
| 4 | 1 | 5 | 1   | 5 | 5 | 5   | 2 | 1   |
| 3 | 4 | 4 | 2   | 4 | 3 | 4   | 4 | 3   |
| 3 | 4 | 4 | 1   | 3 | 4 | 4   | 3 | 1   |
| 4 | 5 | 3 | 2   | 4 | 3 | 2   | 4 | 3   |
| 5 | 4 | 4 | 1   | 3 | 5 | 999 | 4 | 3   |
| 4 | 4 | 4 | 2   | 4 | 5 | 4   | 1 | 1   |
| 4 | 4 | 4 | 1   | 4 | 3 | 4   | 2 | 2   |
| 5 | 4 | 4 | 2   | 5 | 4 | 5   | 2 | 1   |
| 5 | 4 | 3 | 1   | 5 | 4 | 3   | 4 | 2   |
| 5 | 5 | 5 | 2   | 5 | 4 | 4   | 5 | 2   |
| 5 | 4 | 4 | 1   | 5 | 5 | 999 | 4 | 1   |
| 4 | 4 | 4 | 1   | 3 | 5 | 5   | 5 | 1   |
| 4 | 4 | 4 | 2   | 4 | 5 | 5   | 4 | 2   |
| 2 | 2 | 1 | 2   | 1 | 2 | 2   | 2 | 999 |
| 4 | 4 | 4 | 2   | 5 | 4 | 4   | 2 | 1   |
| 2 | 3 | 3 | 2   | 2 | 5 | 4   | 3 | 2   |
| 3 | 2 | 4 | 1   | 2 | 3 | 2   | 3 | 3   |
| 2 | 1 | 2 | 2   | 2 | 2 | 2   | 2 | 2   |
| 5 | 4 | 5 | 1   | 5 | 5 | 5   | 3 | 1   |
| 4 | 2 | 4 | 2   | 4 | 5 | 4   | 1 | 1   |
| 2 | 1 | 2 | 3   | 2 | 2 | 2   | 4 | 3   |
| 4 | 3 | 5 | 2   | 5 | 5 | 4   | 3 | 1   |
| 4 | 5 | 3 | 2   | 4 | 2 | 1   | 5 | 2   |
| 5 | 3 | 5 | 3   | 1 | 4 | 3   | 3 | 2   |
| 5 | 4 | 5 | 4   | 5 | 5 | 5   | 3 | 2   |
| 3 | 4 | 3 | 2   | 3 | 4 | 4   | 4 | 2   |
| 2 | 1 | 3 | 3   | 4 | 4 | 4   | 3 | 3   |
| 4 | 1 | 4 | 999 | 4 | 4 | 5   | 2 | 2   |
| 4 | 1 | 4 | 4   | 3 | 2 | 3   | 5 | 1   |
| 5 | 2 | 4 | 3   | 5 | 4 | 5   | 2 | 2   |
| 3 | 3 | 3 | 1   | 4 | 5 | 5   | 3 | 2   |
| 4 | 4 | 5 | 1   | 5 | 5 | 5   | 2 | 1   |
| 3 | 2 | 3 | 4   | 2 | 5 | 5   | 3 | 1   |
| 5 | 4 | 5 | 1   | 4 | 5 | 5   | 2 | 2   |
| 2 | 3 | 5 | 1   | 1 | 5 | 3   | 1 | 2   |
| 5 | 1 | 5 | 1   | 4 | 3 | 5   | 1 | 5   |
| 4 | 3 | 3 | 2   | 3 | 4 | 3   | 3 | 3   |
| 2 | 3 | 4 | 5   | 5 | 4 | 2   | 3 | 4   |
| 4 | 3 | 5 | 1   | 4 | 5 | 5   | 1 | 1   |

|   |   |     |     |   |     |     |   |   |
|---|---|-----|-----|---|-----|-----|---|---|
| 3 | 4 | 3   | 2   | 3 | 4   | 3   | 2 | 2 |
| 4 | 2 | 3   | 2   | 3 | 4   | 4   | 4 | 1 |
| 3 | 1 | 2   | 3   | 3 | 4   | 4   | 4 | 3 |
| 3 | 2 | 2   | 3   | 2 | 3   | 3   | 4 | 3 |
| 3 | 2 | 3   | 2   | 4 | 4   | 3   | 4 | 2 |
| 1 | 3 | 3   | 3   | 3 | 4   | 3   | 3 | 3 |
| 5 | 1 | 5   | 3   | 5 | 5   | 1   | 2 | 1 |
| 5 | 1 | 5   | 2   | 4 | 5   | 5   | 1 | 2 |
| 4 | 4 | 5   | 2   | 5 | 5   | 4   | 2 | 1 |
| 2 | 3 | 4   | 3   | 4 | 5   | 5   | 2 | 1 |
| 3 | 2 | 1   | 3   | 4 | 2   | 5   | 5 | 3 |
| 5 | 3 | 5   | 2   | 4 | 5   | 5   | 3 | 1 |
| 3 | 4 | 5   | 2   | 5 | 5   | 4   | 4 | 1 |
| 5 | 2 | 4   | 3   | 5 | 3   | 4   | 2 | 2 |
| 3 | 5 | 4   | 999 | 2 | 5   | 5   | 4 | 3 |
| 5 | 4 | 5   | 1   | 5 | 5   | 5   | 2 | 1 |
| 4 | 2 | 2   | 2   | 4 | 4   | 5   | 3 | 1 |
| 4 | 3 | 4   | 1   | 5 | 4   | 5   | 2 | 1 |
| 5 | 5 | 5   | 1   | 5 | 5   | 5   | 1 | 1 |
| 4 | 4 | 4   | 3   | 5 | 4   | 5   | 4 | 1 |
| 4 | 4 | 4   | 2   | 5 | 5   | 5   | 1 | 1 |
| 5 | 1 | 4   | 2   | 5 | 5   | 1   | 2 | 1 |
| 5 | 3 | 5   | 2   | 4 | 5   | 999 | 1 | 1 |
| 4 | 3 | 4   | 2   | 4 | 4   | 5   | 2 | 1 |
| 2 | 5 | 4   | 1   | 3 | 4   | 3   | 5 | 1 |
| 5 | 5 | 5   | 1   | 5 | 5   | 5   | 1 | 1 |
| 5 | 5 | 5   | 1   | 5 | 5   | 5   | 2 | 1 |
| 5 | 4 | 5   | 1   | 5 | 5   | 4   | 3 | 2 |
| 4 | 4 | 4   | 3   | 5 | 5   | 5   | 3 | 1 |
| 4 | 4 | 4   | 1   | 4 | 5   | 5   | 1 | 1 |
| 5 | 5 | 5   | 2   | 5 | 5   | 5   | 3 | 2 |
| 5 | 5 | 5   | 1   | 5 | 5   | 5   | 4 | 4 |
| 4 | 3 | 5   | 1   | 5 | 5   | 5   | 3 | 1 |
| 5 | 4 | 4   | 2   | 5 | 5   | 5   | 4 | 2 |
| 1 | 1 | 3   | 1   | 4 | 999 | 4   | 5 | 1 |
| 4 | 4 | 4   | 1   | 3 | 5   | 5   | 2 | 1 |
| 3 | 3 | 999 | 3   | 4 | 4   | 3   | 5 | 4 |
| 2 | 2 | 3   | 3   | 2 | 3   | 5   | 2 | 1 |
| 4 | 3 | 4   | 3   | 3 | 3   | 3   | 1 | 2 |
| 1 | 1 | 3   | 1   | 1 | 5   | 2   | 1 | 1 |
| 5 | 5 | 1   | 5   | 5 | 5   | 5   | 1 | 1 |
| 5 | 4 | 5   | 2   | 5 | 5   | 3   | 2 | 1 |
| 4 | 3 | 4   | 2   | 5 | 5   | 4   | 2 | 2 |
| 1 | 3 | 4   | 2   | 5 | 4   | 4   | 3 | 3 |
| 2 | 2 | 3   | 2   | 3 | 4   | 3   | 4 | 1 |
| 5 | 4 | 5   | 2   | 5 | 5   | 4   | 2 | 1 |
| 3 | 2 | 3   | 2   | 4 | 4   | 4   | 2 | 2 |
| 4 | 4 | 5   | 1   | 5 | 5   | 5   | 3 | 1 |
| 3 | 2 | 5   | 3   | 4 | 4   | 5   | 4 | 3 |
| 5 | 5 | 5   | 5   | 4 | 5   | 4   | 1 | 1 |

|   |     |   |   |   |   |   |   |   |
|---|-----|---|---|---|---|---|---|---|
| 1 | 1   | 1 | 4 | 1 | 4 | 1 | 1 | 3 |
| 5 | 5   | 4 | 1 | 5 | 5 | 5 | 4 | 2 |
| 4 | 2   | 5 | 3 | 3 | 2 | 3 | 4 | 3 |
| 5 | 5   | 5 | 2 | 5 | 5 | 5 | 4 | 2 |
| 4 | 3   | 4 | 2 | 1 | 5 | 4 | 4 | 1 |
| 4 | 3   | 4 | 1 | 4 | 4 | 4 | 3 | 1 |
| 3 | 1   | 1 | 5 | 1 | 3 | 3 | 3 | 3 |
| 5 | 4   | 5 | 1 | 5 | 5 | 5 | 1 | 2 |
| 3 | 2   | 4 | 3 | 3 | 4 | 4 | 5 | 2 |
| 4 | 4   | 5 | 2 | 4 | 5 | 4 | 5 | 1 |
| 4 | 4   | 3 | 2 | 3 | 4 | 4 | 3 | 2 |
| 5 | 4   | 5 | 1 | 5 | 5 | 4 | 1 | 1 |
| 2 | 3   | 2 | 2 | 2 | 3 | 3 | 3 | 3 |
| 5 | 5   | 4 | 1 | 5 | 5 | 5 | 3 | 1 |
| 5 | 4   | 5 | 1 | 5 | 5 | 5 | 2 | 1 |
| 5 | 5   | 5 | 2 | 5 | 5 | 5 | 1 | 1 |
| 5 | 4   | 4 | 2 | 4 | 5 | 5 | 4 | 2 |
| 3 | 3   | 3 | 2 | 3 | 4 | 4 | 3 | 2 |
| 4 | 4   | 4 | 2 | 4 | 5 | 4 | 1 | 2 |
| 4 | 5   | 4 | 1 | 4 | 4 | 5 | 5 | 2 |
| 4 | 3   | 3 | 1 | 3 | 5 | 4 | 3 | 2 |
| 3 | 4   | 5 | 3 | 5 | 1 | 1 | 4 | 1 |
| 4 | 4   | 3 | 2 | 4 | 5 | 3 | 2 | 2 |
| 3 | 999 | 4 | 1 | 5 | 5 | 4 | 4 | 1 |
| 3 | 2   | 3 | 3 | 4 | 3 | 3 | 3 | 4 |
| 4 | 4   | 4 | 1 | 4 | 4 | 4 | 4 | 1 |
| 4 | 3   | 5 | 2 | 4 | 5 | 4 | 3 | 2 |
| 5 | 3   | 4 | 2 | 3 | 5 | 5 | 2 | 2 |
| 4 | 4   | 4 | 3 | 5 | 3 | 4 | 2 | 2 |
| 5 | 3   | 4 | 3 | 4 | 5 | 3 | 5 | 2 |
| 4 | 3   | 5 | 2 | 5 | 3 | 3 | 2 | 1 |
| 5 | 4   | 3 | 1 | 4 | 5 | 5 | 3 | 1 |
| 3 | 3   | 5 | 2 | 4 | 5 | 4 | 2 | 1 |
| 4 | 3   | 4 | 3 | 4 | 4 | 5 | 1 | 1 |
| 3 | 3   | 4 | 1 | 4 | 5 | 5 | 4 | 2 |
| 4 | 4   | 5 | 2 | 5 | 5 | 5 | 4 | 2 |
| 5 | 4   | 5 | 2 | 4 | 5 | 5 | 2 | 2 |
| 5 | 4   | 4 | 2 | 4 | 4 | 5 | 3 | 2 |
| 2 | 3   | 4 | 1 | 4 | 4 | 4 | 3 | 1 |
| 2 | 3   | 3 | 2 | 2 | 3 | 3 | 3 | 3 |
| 4 | 4   | 4 | 2 | 4 | 4 | 4 | 2 | 2 |
| 3 | 4   | 4 | 2 | 4 | 5 | 4 | 3 | 2 |
| 5 | 3   | 5 | 1 | 4 | 5 | 5 | 1 | 1 |
| 4 | 4   | 5 | 1 | 4 | 4 | 3 | 2 | 1 |
| 5 | 5   | 5 | 3 | 5 | 5 | 5 | 2 | 1 |
| 5 | 4   | 4 | 1 | 3 | 3 | 2 | 4 | 3 |
| 3 | 2   | 3 | 4 | 2 | 3 | 2 | 3 | 4 |
| 2 | 4   | 5 | 2 | 4 | 3 | 2 | 4 | 4 |
| 4 | 4   | 3 | 1 | 5 | 5 | 4 | 3 | 2 |
| 3 | 4   | 4 | 1 | 3 | 4 | 3 | 2 | 1 |

|   |   |     |     |   |   |     |     |     |
|---|---|-----|-----|---|---|-----|-----|-----|
| 3 | 4 | 4   | 2   | 5 | 5 | 4   | 5   | 2   |
| 4 | 4 | 4   | 999 | 5 | 4 | 4   | 1   | 1   |
| 4 | 4 | 4   | 2   | 4 | 5 | 4   | 3   | 3   |
| 5 | 3 | 4   | 2   | 3 | 5 | 3   | 3   | 3   |
| 1 | 3 | 3   | 3   | 3 | 3 | 4   | 4   | 3   |
| 5 | 5 | 5   | 5   | 5 | 5 | 5   | 4   | 4   |
| 3 | 2 | 4   | 3   | 1 | 2 | 3   | 2   | 1   |
| 4 | 4 | 2   | 2   | 4 | 5 | 3   | 1   | 1   |
| 5 | 4 | 4   | 2   | 3 | 4 | 4   | 3   | 1   |
| 4 | 3 | 3   | 2   | 4 | 5 | 3   | 5   | 2   |
| 5 | 4 | 4   | 1   | 5 | 4 | 5   | 3   | 1   |
| 5 | 5 | 5   | 1   | 5 | 5 | 5   | 1   | 1   |
| 3 | 3 | 3   | 2   | 3 | 4 | 3   | 2   | 2   |
| 4 | 4 | 4   | 2   | 3 | 4 | 4   | 2   | 1   |
| 2 | 2 | 3   | 3   | 3 | 3 | 3   | 3   | 3   |
| 4 | 3 | 5   | 2   | 5 | 5 | 5   | 1   | 1   |
| 3 | 2 | 4   | 2   | 3 | 5 | 4   | 2   | 1   |
| 5 | 4 | 5   | 1   | 4 | 5 | 4   | 3   | 2   |
| 4 | 4 | 4   | 2   | 2 | 5 | 999 | 999 | 999 |
| 3 | 3 | 3   | 1   | 5 | 5 | 5   | 1   | 1   |
| 5 | 5 | 5   | 2   | 5 | 5 | 5   | 5   | 1   |
| 3 | 2 | 3   | 2   | 3 | 4 | 4   | 3   | 2   |
| 3 | 2 | 999 | 2   | 2 | 3 | 4   | 2   | 3   |
| 4 | 2 | 4   | 3   | 2 | 3 | 2   | 4   | 1   |
| 5 | 3 | 5   | 2   | 5 | 5 | 5   | 2   | 1   |
| 2 | 3 | 3   | 3   | 2 | 4 | 3   | 2   | 2   |
| 4 | 2 | 5   | 2   | 5 | 4 | 5   | 3   | 2   |
| 3 | 3 | 4   | 2   | 4 | 4 | 5   | 2   | 1   |
| 4 | 2 | 5   | 2   | 4 | 5 | 4   | 2   | 2   |
| 4 | 4 | 5   | 1   | 4 | 5 | 4   | 2   | 1   |
| 5 | 4 | 2   | 5   | 5 | 5 | 5   | 2   | 1   |
| 5 | 5 | 5   | 2   | 4 | 5 | 4   | 2   | 1   |
| 4 | 3 | 5   | 2   | 5 | 5 | 4   | 2   | 1   |
| 5 | 3 | 4   | 2   | 5 | 5 | 5   | 2   | 1   |
| 5 | 3 | 4   | 1   | 5 | 5 | 5   | 2   | 1   |
| 5 | 4 | 5   | 1   | 5 | 5 | 4   | 5   | 1   |
| 4 | 5 | 5   | 2   | 5 | 5 | 3   | 3   | 4   |
| 4 | 4 | 5   | 1   | 5 | 5 | 5   | 2   | 1   |
| 3 | 2 | 3   | 1   | 3 | 5 | 4   | 2   | 1   |
| 5 | 3 | 4   | 1   | 2 | 4 | 2   | 3   | 1   |
| 3 | 2 | 2   | 3   | 2 | 4 | 4   | 3   | 4   |
| 4 | 4 | 4   | 2   | 4 | 4 | 3   | 3   | 3   |
| 4 | 4 | 4   | 2   | 5 | 4 | 4   | 1   | 1   |
| 5 | 5 | 5   | 3   | 5 | 5 | 5   | 3   | 1   |
| 5 | 3 | 5   | 2   | 4 | 5 | 5   | 3   | 1   |
| 4 | 4 | 3   | 1   | 3 | 4 | 4   | 3   | 1   |
| 5 | 4 | 5   | 2   | 4 | 5 | 5   | 3   | 2   |
| 2 | 2 | 3   | 3   | 2 | 3 | 2   | 3   | 2   |
| 4 | 4 | 4   | 2   | 3 | 4 | 4   | 3   | 2   |
| 4 | 1 | 3   | 2   | 2 | 4 | 3   | 2   | 1   |

|   |   |   |   |     |     |   |   |     |
|---|---|---|---|-----|-----|---|---|-----|
| 2 | 3 | 4 | 2 | 2   | 4   | 4 | 3 | 2   |
| 4 | 4 | 4 | 1 | 4   | 5   | 4 | 3 | 1   |
| 4 | 5 | 5 | 1 | 5   | 5   | 5 | 2 | 1   |
| 3 | 4 | 4 | 2 | 5   | 5   | 5 | 3 | 2   |
| 4 | 2 | 3 | 2 | 3   | 4   | 4 | 3 | 2   |
| 3 | 3 | 4 | 2 | 4   | 4   | 4 | 2 | 2   |
| 4 | 5 | 5 | 1 | 4   | 5   | 5 | 5 | 1   |
| 3 | 2 | 3 | 2 | 4   | 4   | 4 | 1 | 2   |
| 5 | 5 | 4 | 2 | 5   | 4   | 5 | 1 | 1   |
| 3 | 2 | 5 | 2 | 5   | 5   | 4 | 3 | 4   |
| 4 | 4 | 4 | 3 | 4   | 3   | 4 | 4 | 2   |
| 5 | 4 | 5 | 1 | 5   | 5   | 5 | 1 | 1   |
| 4 | 2 | 2 | 1 | 3   | 3   | 3 | 2 | 1   |
| 4 | 3 | 3 | 2 | 3   | 4   | 4 | 3 | 3   |
| 4 | 4 | 4 | 2 | 4   | 5   | 4 | 3 | 1   |
| 5 | 3 | 4 | 2 | 3   | 4   | 4 | 3 | 2   |
| 4 | 4 | 4 | 2 | 4   | 4   | 4 | 4 | 2   |
| 4 | 4 | 4 | 2 | 4   | 5   | 4 | 2 | 1   |
| 4 | 3 | 3 | 2 | 4   | 4   | 3 | 3 | 3   |
| 5 | 3 | 5 | 2 | 5   | 5   | 4 | 3 | 1   |
| 5 | 5 | 5 | 1 | 5   | 5   | 5 | 1 | 1   |
| 5 | 5 | 5 | 1 | 5   | 5   | 5 | 2 | 1   |
| 3 | 5 | 4 | 2 | 3   | 3   | 4 | 4 | 1   |
| 4 | 3 | 4 | 2 | 4   | 3   | 4 | 3 | 2   |
| 4 | 4 | 3 | 2 | 4   | 4   | 4 | 2 | 2   |
| 3 | 2 | 4 | 2 | 5   | 4   | 4 | 3 | 1   |
| 4 | 3 | 4 | 2 | 5   | 5   | 5 | 2 | 2   |
| 4 | 4 | 2 | 3 | 999 | 2   | 3 | 2 | 3   |
| 3 | 1 | 4 | 1 | 5   | 5   | 4 | 4 | 1   |
| 4 | 3 | 4 | 2 | 4   | 4   | 4 | 4 | 3   |
| 2 | 2 | 3 | 2 | 3   | 4   | 3 | 3 | 3   |
| 3 | 4 | 4 | 2 | 4   | 3   | 4 | 3 | 3   |
| 3 | 3 | 4 | 1 | 4   | 5   | 5 | 4 | 1   |
| 4 | 3 | 4 | 2 | 4   | 4   | 4 | 2 | 2   |
| 4 | 3 | 3 | 2 | 3   | 4   | 4 | 3 | 2   |
| 4 | 5 | 5 | 1 | 5   | 5   | 5 | 2 | 1   |
| 2 | 4 | 3 | 2 | 2   | 5   | 3 | 5 | 1   |
| 3 | 2 | 3 | 2 | 3   | 4   | 4 | 3 | 3   |
| 5 | 4 | 4 | 2 | 5   | 4   | 5 | 3 | 1   |
| 5 | 3 | 4 | 1 | 5   | 5   | 5 | 5 | 1   |
| 4 | 3 | 4 | 3 | 4   | 5   | 5 | 4 | 2   |
| 5 | 4 | 4 | 2 | 4   | 4   | 4 | 4 | 2   |
| 1 | 2 | 2 | 2 | 5   | 4   | 2 | 1 | 2   |
| 4 | 3 | 4 | 2 | 5   | 999 | 4 | 1 | 1   |
| 4 | 3 | 4 | 1 | 4   | 4   | 4 | 4 | 1   |
| 4 | 4 | 5 | 1 | 3   | 5   | 4 | 3 | 1   |
| 5 | 5 | 4 | 1 | 3   | 5   | 5 | 4 | 2   |
| 4 | 3 | 3 | 2 | 4   | 4   | 4 | 3 | 999 |
| 4 | 2 | 4 | 3 | 3   | 4   | 4 | 3 | 2   |
| 3 | 3 | 4 | 2 | 3   | 4   | 2 | 3 | 3   |



|   |     |     |     |     |   |   |     |     |
|---|-----|-----|-----|-----|---|---|-----|-----|
| 4 | 3   | 4   | 3   | 5   | 3 | 4 | 2   | 1   |
| 5 | 5   | 4   | 2   | 4   | 5 | 5 | 3   | 1   |
| 3 | 3   | 4   | 1   | 4   | 5 | 4 | 4   | 1   |
| 5 | 1   | 5   | 2   | 4   | 4 | 4 | 3   | 2   |
| 5 | 3   | 4   | 2   | 5   | 4 | 4 | 2   | 2   |
| 4 | 3   | 4   | 2   | 4   | 4 | 4 | 3   | 2   |
| 4 | 3   | 4   | 2   | 3   | 5 | 4 | 2   | 2   |
| 4 | 5   | 5   | 2   | 4   | 4 | 5 | 4   | 2   |
| 4 | 3   | 4   | 2   | 3   | 5 | 5 | 2   | 3   |
| 4 | 4   | 3   | 2   | 4   | 4 | 3 | 2   | 2   |
| 2 | 2   | 4   | 2   | 5   | 5 | 5 | 3   | 2   |
| 4 | 999 | 4   | 2   | 4   | 5 | 4 | 2   | 2   |
| 3 | 3   | 999 | 2   | 3   | 4 | 3 | 4   | 1   |
| 4 | 4   | 4   | 1   | 4   | 4 | 4 | 1   | 1   |
| 2 | 3   | 4   | 2   | 4   | 4 | 5 | 3   | 3   |
| 4 | 3   | 4   | 2   | 4   | 4 | 4 | 3   | 2   |
| 4 | 3   | 3   | 999 | 4   | 5 | 3 | 2   | 3   |
| 2 | 2   | 2   | 2   | 3   | 4 | 3 | 2   | 2   |
| 3 | 3   | 2   | 3   | 4   | 4 | 4 | 3   | 1   |
| 2 | 3   | 3   | 3   | 5   | 4 | 4 | 2   | 1   |
| 3 | 2   | 2   | 3   | 3   | 3 | 1 | 4   | 2   |
| 3 | 3   | 4   | 2   | 4   | 4 | 3 | 2   | 999 |
| 4 | 3   | 4   | 3   | 4   | 4 | 4 | 3   | 3   |
| 3 | 2   | 2   | 3   | 5   | 4 | 5 | 5   | 3   |
| 3 | 4   | 5   | 2   | 5   | 5 | 5 | 2   | 2   |
| 4 | 4   | 4   | 2   | 5   | 5 | 5 | 2   | 1   |
| 4 | 4   | 4   | 2   | 4   | 5 | 4 | 2   | 2   |
| 4 | 3   | 4   | 3   | 5   | 5 | 4 | 3   | 1   |
| 4 | 3   | 4   | 2   | 4   | 4 | 3 | 2   | 1   |
| 5 | 4   | 5   | 2   | 5   | 5 | 5 | 2   | 1   |
| 5 | 4   | 5   | 1   | 4   | 4 | 5 | 999 | 2   |
| 4 | 4   | 5   | 2   | 5   | 5 | 4 | 1   | 5   |
| 4 | 4   | 4   | 1   | 4   | 5 | 4 | 5   | 1   |
| 3 | 3   | 4   | 3   | 5   | 4 | 4 | 3   | 1   |
| 4 | 3   | 4   | 2   | 4   | 5 | 4 | 3   | 2   |
| 4 | 3   | 5   | 2   | 999 | 5 | 4 | 2   | 5   |
| 3 | 1   | 2   | 2   | 4   | 5 | 4 | 4   | 2   |
| 4 | 4   | 4   | 2   | 4   | 5 | 4 | 2   | 2   |
| 1 | 1   | 1   | 5   | 3   | 1 | 2 | 5   | 5   |
| 5 | 3   | 4   | 4   | 3   | 3 | 5 | 5   | 4   |
| 4 | 1   | 4   | 2   | 4   | 5 | 5 | 5   | 1   |
| 3 | 3   | 3   | 1   | 4   | 5 | 5 | 2   | 2   |
| 5 | 1   | 3   | 2   | 4   | 3 | 2 | 1   | 4   |
| 5 | 3   | 5   | 1   | 5   | 5 | 5 | 1   | 1   |
| 3 | 4   | 4   | 2   | 4   | 4 | 4 | 3   | 2   |
| 5 | 5   | 5   | 1   | 5   | 5 | 5 | 4   | 4   |
| 4 | 3   | 4   | 5   | 5   | 5 | 5 | 1   | 5   |
| 5 | 4   | 3   | 2   | 4   | 3 | 3 | 3   | 3   |
| 4 | 3   | 5   | 2   | 5   | 5 | 5 | 3   | 2   |
| 3 | 3   | 3   | 1   | 2   | 5 | 4 | 5   | 3   |

|     |   |   |   |   |   |   |   |     |
|-----|---|---|---|---|---|---|---|-----|
| 2   | 1 | 4 | 2 | 3 | 4 | 4 | 1 | 2   |
| 5   | 4 | 4 | 2 | 5 | 5 | 5 | 2 | 2   |
| 3   | 4 | 4 | 2 | 4 | 4 | 3 | 3 | 2   |
| 5   | 1 | 5 | 1 | 5 | 4 | 5 | 5 | 1   |
| 3   | 2 | 3 | 2 | 4 | 5 | 4 | 3 | 1   |
| 4   | 4 | 4 | 2 | 4 | 4 | 5 | 3 | 2   |
| 4   | 3 | 5 | 2 | 4 | 4 | 4 | 2 | 2   |
| 4   | 4 | 5 | 1 | 5 | 5 | 5 | 5 | 1   |
| 4   | 4 | 4 | 2 | 4 | 4 | 3 | 3 | 2   |
| 3   | 2 | 3 | 3 | 4 | 3 | 2 | 4 | 2   |
| 5   | 3 | 3 | 3 | 3 | 3 | 4 | 5 | 4   |
| 4   | 3 | 5 | 2 | 4 | 4 | 4 | 3 | 2   |
| 4   | 3 | 4 | 2 | 5 | 5 | 5 | 2 | 2   |
| 4   | 5 | 5 | 1 | 5 | 5 | 5 | 4 | 1   |
| 4   | 3 | 4 | 3 | 3 | 4 | 4 | 4 | 2   |
| 5   | 1 | 5 | 1 | 5 | 5 | 5 | 1 | 1   |
| 3   | 1 | 3 | 3 | 4 | 5 | 3 | 3 | 1   |
| 3   | 2 | 4 | 2 | 4 | 3 | 3 | 4 | 2   |
| 3   | 4 | 4 | 2 | 5 | 5 | 3 | 3 | 1   |
| 3   | 2 | 4 | 2 | 3 | 4 | 3 | 5 | 4   |
| 3   | 2 | 2 | 3 | 2 | 4 | 2 | 3 | 3   |
| 4   | 4 | 3 | 2 | 4 | 4 | 5 | 3 | 2   |
| 3   | 2 | 3 | 2 | 3 | 4 | 4 | 4 | 2   |
| 5   | 3 | 5 | 1 | 4 | 5 | 4 | 3 | 1   |
| 3   | 3 | 3 | 2 | 4 | 4 | 3 | 2 | 2   |
| 4   | 3 | 4 | 3 | 4 | 4 | 4 | 4 | 2   |
| 999 | 3 | 3 | 3 | 3 | 4 | 4 | 2 | 3   |
| 3   | 2 | 4 | 3 | 3 | 5 | 4 | 3 | 2   |
| 4   | 3 | 4 | 2 | 3 | 3 | 3 | 3 | 2   |
| 3   | 2 | 2 | 1 | 5 | 5 | 5 | 5 | 2   |
| 4   | 3 | 3 | 1 | 2 | 4 | 5 | 4 | 1   |
| 4   | 1 | 4 | 2 | 5 | 5 | 5 | 5 | 1   |
| 4   | 1 | 5 | 3 | 5 | 5 | 5 | 2 | 2   |
| 3   | 2 | 3 | 1 | 3 | 5 | 3 | 2 | 1   |
| 3   | 5 | 5 | 3 | 4 | 5 | 4 | 2 | 2   |
| 3   | 3 | 4 | 1 | 4 | 4 | 2 | 3 | 1   |
| 5   | 5 | 5 | 2 | 5 | 5 | 5 | 3 | 1   |
| 4   | 3 | 3 | 1 | 4 | 5 | 4 | 2 | 1   |
| 5   | 3 | 4 | 1 | 3 | 5 | 5 | 4 | 2   |
| 4   | 4 | 4 | 2 | 4 | 5 | 4 | 3 | 2   |
| 3   | 3 | 4 | 2 | 4 | 5 | 4 | 2 | 999 |
| 5   | 5 | 4 | 1 | 5 | 5 | 5 | 2 | 2   |
| 5   | 3 | 4 | 1 | 5 | 5 | 4 | 2 | 1   |
| 4   | 2 | 5 | 1 | 5 | 5 | 5 | 4 | 2   |
| 4   | 4 | 5 | 3 | 3 | 3 | 4 | 5 | 4   |
| 5   | 4 | 5 | 2 | 5 | 5 | 5 | 2 | 1   |
| 5   | 4 | 5 | 2 | 5 | 5 | 5 | 1 | 1   |
| 2   | 2 | 4 | 3 | 3 | 2 | 2 | 4 | 2   |
| 4   | 1 | 4 | 1 | 4 | 5 | 5 | 2 | 1   |
| 4   | 3 | 4 | 2 | 3 | 4 | 4 | 4 | 3   |

|   |   |   |   |   |   |   |   |   |
|---|---|---|---|---|---|---|---|---|
| 4 | 4 | 5 | 2 | 5 | 5 | 5 | 1 | 1 |
| 4 | 5 | 4 | 1 | 5 | 4 | 5 | 1 | 2 |
| 4 | 3 | 3 | 2 | 4 | 4 | 4 | 2 | 1 |
| 4 | 4 | 5 | 2 | 5 | 5 | 5 | 2 | 1 |
| 5 | 4 | 5 | 2 | 5 | 5 | 5 | 3 | 2 |
| 4 | 5 | 5 | 2 | 5 | 5 | 5 | 1 | 1 |
| 5 | 4 | 5 | 2 | 4 | 5 | 5 | 2 | 1 |
| 4 | 4 | 5 | 3 | 4 | 4 | 4 | 4 | 2 |
| 1 | 1 | 3 | 2 | 3 | 2 | 2 | 1 | 1 |
| 3 | 2 | 4 | 1 | 3 | 4 | 5 | 1 | 1 |
| 5 | 5 | 5 | 1 | 5 | 5 | 5 | 1 | 1 |
| 3 | 2 | 4 | 2 | 3 | 3 | 4 | 3 | 3 |
| 5 | 4 | 5 | 1 | 5 | 5 | 4 | 3 | 2 |
| 4 | 4 | 4 | 3 | 5 | 5 | 5 | 5 | 2 |
| 4 | 3 | 4 | 2 | 4 | 4 | 4 | 3 | 2 |
| 5 | 4 | 5 | 2 | 5 | 5 | 5 | 3 | 2 |

| IPPA_A24 | IPPA_A25 | SDQ1 | SDQ2 | SDQ3 | SDQ4 | SDQ5 | SDQ6 | SDQ7 |
|----------|----------|------|------|------|------|------|------|------|
| 4        | 5        | 3    | 1    | 1    | 3    | 1    | 1    | 3    |
| 4        | 4        | 3    | 2    | 1    | 3    | 2    | 3    | 2    |
| 4        | 4        | 3    | 2    | 3    | 2    | 3    | 1    | 2    |
| 5        | 5        | 3    | 2    | 1    | 3    | 2    | 1    | 3    |
| 2        | 3        | 2    | 2    | 2    | 3    | 2    | 2    | 2    |
| 4        | 5        | 3    | 2    | 3    | 3    | 1    | 1    | 2    |
| 2        | 4        | 3    | 2    | 3    | 3    | 1    | 1    | 3    |
| 4        | 5        | 3    | 2    | 3    | 3    | 3    | 2    | 2    |
| 4        | 5        | 3    | 2    | 3    | 3    | 2    | 1    | 2    |
| 5        | 5        | 3    | 1    | 3    | 3    | 1    | 1    | 3    |
| 2        | 3        | 2    | 3    | 2    | 2    | 2    | 1    | 2    |
| 5        | 5        | 3    | 1    | 1    | 3    | 2    | 2    | 1    |
| 999      | 5        | 999  | 1    | 1    | 2    | 2    | 2    | 2    |
| 5        | 5        | 3    | 2    | 1    | 3    | 1    | 1    | 3    |
| 5        | 5        | 3    | 1    | 1    | 3    | 1    | 1    | 3    |
| 4        | 5        | 2    | 1    | 1    | 3    | 1    | 1    | 3    |
| 4        | 4        | 3    | 2    | 1    | 3    | 1    | 1    | 3    |
| 4        | 3        | 3    | 1    | 1    | 3    | 2    | 1    | 3    |
| 1        | 2        | 2    | 3    | 2    | 2    | 1    | 1    | 2    |
| 3        | 4        | 3    | 1    | 2    | 3    | 1    | 1    | 3    |
| 4        | 5        | 3    | 1    | 3    | 3    | 1    | 1    | 2    |
| 2        | 4        | 3    | 1    | 3    | 3    | 3    | 2    | 2    |
| 5        | 4        | 3    | 1    | 2    | 3    | 1    | 1    | 3    |
| 5        | 4        | 2    | 3    | 2    | 2    | 3    | 1    | 2    |
| 4        | 5        | 3    | 2    | 1    | 3    | 1    | 1    | 3    |
| 4        | 3        | 3    | 1    | 2    | 3    | 1    | 2    | 3    |
| 4        | 5        | 2    | 1    | 2    | 2    | 2    | 1    | 2    |
| 3        | 5        | 3    | 2    | 3    | 3    | 2    | 1    | 3    |
| 2        | 3        | 2    | 3    | 2    | 3    | 3    | 1    | 1    |
| 5        | 5        | 3    | 3    | 2    | 3    | 3    | 1    | 2    |
| 5        | 5        | 3    | 2    | 2    | 3    | 1    | 1    | 2    |
| 3        | 4        | 999  | 999  | 999  | 2    | 2    | 2    | 999  |
| 3        | 5        | 2    | 3    | 2    | 2    | 3    | 2    | 2    |
| 4        | 5        | 2    | 3    | 1    | 2    | 1    | 1    | 2    |
| 3        | 3        | 3    | 1    | 1    | 3    | 1    | 2    | 2    |
| 1        | 2        | 2    | 3    | 2    | 2    | 2    | 2    | 1    |
| 3        | 3        | 3    | 1    | 2    | 3    | 1    | 1    | 3    |
| 5        | 5        | 3    | 1    | 1    | 3    | 1    | 1    | 3    |
| 4        | 5        | 2    | 1    | 2    | 2    | 1    | 1    | 2    |
| 4        | 5        | 2    | 1    | 1    | 3    | 1    | 1    | 2    |
| 5        | 5        | 3    | 1    | 1    | 3    | 1    | 1    | 3    |
| 5        | 5        | 3    | 2    | 1    | 3    | 1    | 1    | 3    |
| 3        | 4        | 3    | 2    | 2    | 3    | 1    | 2    | 3    |
| 2        | 4        | 3    | 1    | 1    | 3    | 1    | 1    | 3    |
| 3        | 5        | 3    | 2    | 1    | 3    | 1    | 1    | 2    |
| 2        | 2        | 3    | 3    | 2    | 2    | 3    | 3    | 3    |
| 5        | 5        | 3    | 1    | 1    | 3    | 1    | 1    | 2    |
| 3        | 4        | 3    | 2    | 1    | 3    | 1    | 1    | 3    |
| 4        | 5        | 2    | 1    | 1    | 2    | 2    | 1    | 2    |

|   |   |   |   |   |   |   |     |     |
|---|---|---|---|---|---|---|-----|-----|
| 5 | 3 | 2 | 1 | 1 | 3 | 1 | 1   | 1   |
| 5 | 5 | 3 | 2 | 2 | 3 | 3 | 1   | 2   |
| 4 | 4 | 3 | 1 | 1 | 3 | 1 | 1   | 3   |
| 4 | 4 | 2 | 1 | 1 | 2 | 1 | 1   | 2   |
| 5 | 5 | 3 | 2 | 1 | 2 | 1 | 1   | 3   |
| 3 | 5 | 2 | 1 | 1 | 3 | 1 | 1   | 2   |
| 5 | 3 | 3 | 3 | 1 | 3 | 3 | 3   | 3   |
| 4 | 4 | 3 | 3 | 2 | 3 | 2 | 1   | 2   |
| 4 | 5 | 3 | 2 | 2 | 2 | 1 | 2   | 2   |
| 4 | 4 | 3 | 1 | 1 | 2 | 1 | 1   | 2   |
| 5 | 5 | 3 | 2 | 2 | 3 | 2 | 1   | 2   |
| 5 | 5 | 3 | 2 | 2 | 3 | 1 | 1   | 2   |
| 1 | 1 | 3 | 1 | 2 | 3 | 1 | 2   | 3   |
| 5 | 4 | 3 | 1 | 2 | 3 | 1 | 1   | 3   |
| 5 | 4 | 3 | 3 | 1 | 3 | 3 | 1   | 2   |
| 1 | 4 | 3 | 2 | 2 | 3 | 2 | 1   | 2   |
| 4 | 4 | 3 | 2 | 1 | 3 | 1 | 1   | 3   |
| 4 | 4 | 3 | 1 | 1 | 3 | 1 | 1   | 3   |
| 3 | 5 | 3 | 2 | 1 | 3 | 1 | 1   | 3   |
| 3 | 5 | 3 | 2 | 2 | 3 | 1 | 1   | 3   |
| 5 | 5 | 3 | 2 | 1 | 3 | 2 | 1   | 3   |
| 5 | 5 | 3 | 2 | 1 | 3 | 1 | 1   | 3   |
| 4 | 3 | 3 | 2 | 2 | 2 | 1 | 2   | 2   |
| 1 | 2 | 2 | 1 | 1 | 3 | 3 | 1   | 3   |
| 4 | 5 | 3 | 2 | 1 | 3 | 1 | 1   | 3   |
| 4 | 4 | 3 | 1 | 1 | 3 | 1 | 1   | 3   |
| 4 | 4 | 3 | 3 | 1 | 3 | 2 | 1   | 3   |
| 5 | 4 | 3 | 2 | 1 | 3 | 2 | 2   | 3   |
| 4 | 5 | 3 | 2 | 1 | 3 | 2 | 1   | 3   |
| 4 | 4 | 3 | 1 | 1 | 3 | 1 | 1   | 2   |
| 5 | 5 | 2 | 1 | 1 | 2 | 2 | 1   | 3   |
| 5 | 4 | 3 | 2 | 1 | 3 | 3 | 1   | 1   |
| 5 | 5 | 3 | 2 | 1 | 3 | 2 | 1   | 3   |
| 4 | 1 | 3 | 1 | 1 | 3 | 1 | 1   | 3   |
| 2 | 4 | 3 | 1 | 2 | 3 | 1 | 1   | 1   |
| 5 | 5 | 2 | 3 | 3 | 2 | 3 | 999 | 3   |
| 5 | 5 | 3 | 3 | 1 | 2 | 2 | 1   | 2   |
| 4 | 5 | 3 | 1 | 1 | 3 | 1 | 1   | 3   |
| 4 | 4 | 2 | 3 | 1 | 3 | 2 | 1   | 1   |
| 4 | 5 | 3 | 3 | 1 | 3 | 2 | 1   | 3   |
| 5 | 4 | 3 | 1 | 2 | 3 | 3 | 1   | 3   |
| 3 | 3 | 2 | 2 | 1 | 2 | 3 | 1   | 2   |
| 3 | 4 | 3 | 2 | 1 | 3 | 2 | 1   | 999 |
| 4 | 5 | 3 | 2 | 1 | 3 | 2 | 1   | 3   |
| 2 | 3 | 3 | 2 | 1 | 3 | 1 | 1   | 2   |
| 3 | 4 | 2 | 3 | 1 | 2 | 1 | 1   | 2   |
| 4 | 5 | 2 | 2 | 2 | 2 | 1 | 1   | 2   |
| 5 | 5 | 3 | 1 | 1 | 3 | 1 | 1   | 3   |
| 4 | 4 | 3 | 1 | 1 | 3 | 1 | 2   | 3   |
| 4 | 4 | 3 | 1 | 1 | 3 | 2 | 1   | 3   |

|   |   |     |     |   |   |   |     |     |
|---|---|-----|-----|---|---|---|-----|-----|
| 4 | 5 | 2   | 3   | 1 | 3 | 3 | 1   | 1   |
| 5 | 5 | 3   | 1   | 1 | 1 | 1 | 1   | 3   |
| 5 | 5 | 3   | 2   | 1 | 3 | 1 | 1   | 3   |
| 2 | 2 | 3   | 1   | 1 | 2 | 3 | 1   | 2   |
| 5 | 5 | 3   | 1   | 1 | 3 | 2 | 1   | 3   |
| 3 | 5 | 3   | 1   | 1 | 3 | 1 | 1   | 2   |
| 4 | 5 | 2   | 1   | 2 | 2 | 2 | 1   | 2   |
| 5 | 5 | 3   | 1   | 1 | 3 | 1 | 1   | 3   |
| 2 | 4 | 3   | 1   | 2 | 2 | 1 | 2   | 2   |
| 5 | 5 | 3   | 1   | 1 | 3 | 1 | 1   | 3   |
| 3 | 2 | 3   | 1   | 2 | 2 | 2 | 1   | 2   |
| 4 | 4 | 3   | 2   | 2 | 3 | 2 | 1   | 3   |
| 5 | 5 | 2   | 3   | 2 | 3 | 3 | 1   | 3   |
| 2 | 5 | 3   | 1   | 1 | 3 | 2 | 1   | 2   |
| 4 | 5 | 3   | 2   | 1 | 3 | 1 | 1   | 3   |
| 4 | 4 | 3   | 2   | 1 | 3 | 1 | 3   | 2   |
| 5 | 5 | 2   | 1   | 1 | 3 | 1 | 1   | 3   |
| 5 | 4 | 3   | 3   | 1 | 3 | 2 | 1   | 2   |
| 4 | 3 | 3   | 1   | 2 | 3 | 1 | 1   | 3   |
| 3 | 5 | 3   | 3   | 1 | 3 | 2 | 1   | 3   |
| 5 | 5 | 3   | 1   | 1 | 3 | 2 | 1   | 2   |
| 3 | 2 | 999 | 1   | 1 | 2 | 1 | 1   | 2   |
| 4 | 5 | 2   | 1   | 1 | 3 | 2 | 1   | 2   |
| 2 | 4 | 2   | 2   | 1 | 2 | 2 | 1   | 2   |
| 3 | 5 | 3   | 2   | 2 | 3 | 3 | 1   | 3   |
| 5 | 5 | 3   | 1   | 1 | 3 | 1 | 1   | 2   |
| 3 | 3 | 3   | 3   | 2 | 3 | 2 | 999 | 2   |
| 5 | 5 | 3   | 2   | 1 | 3 | 2 | 1   | 3   |
| 5 | 5 | 3   | 1   | 1 | 3 | 2 | 999 | 999 |
| 4 | 3 | 3   | 2   | 3 | 1 | 2 | 3   | 3   |
| 5 | 5 | 3   | 2   | 1 | 2 | 2 | 999 | 2   |
| 5 | 5 | 3   | 2   | 3 | 3 | 1 | 1   | 3   |
| 2 | 4 | 2   | 3   | 3 | 3 | 3 | 1   | 2   |
| 5 | 5 | 3   | 3   | 3 | 2 | 2 | 2   | 3   |
| 5 | 2 | 2   | 3   | 2 | 3 | 3 | 1   | 2   |
| 3 | 4 | 2   | 2   | 1 | 3 | 2 | 1   | 2   |
| 4 | 4 | 3   | 1   | 1 | 3 | 2 | 1   | 3   |
| 4 | 5 | 3   | 3   | 2 | 2 | 3 | 2   | 2   |
| 4 | 5 | 2   | 999 | 1 | 2 | 2 | 1   | 2   |
| 4 | 4 | 3   | 1   | 2 | 2 | 2 | 1   | 1   |
| 5 | 5 | 3   | 2   | 1 | 1 | 2 | 1   | 2   |
| 2 | 5 | 3   | 2   | 2 | 3 | 3 | 2   | 2   |
| 5 | 5 | 3   | 3   | 3 | 3 | 2 | 1   | 2   |
| 2 | 3 | 3   | 1   | 2 | 3 | 1 | 2   | 2   |
| 4 | 5 | 2   | 1   | 2 | 3 | 1 | 1   | 2   |
| 5 | 5 | 3   | 1   | 2 | 3 | 1 | 1   | 3   |
| 3 | 5 | 2   | 3   | 3 | 3 | 3 | 1   | 1   |
| 3 | 5 | 3   | 2   | 1 | 3 | 1 | 1   | 3   |
| 4 | 3 | 2   | 1   | 1 | 3 | 3 | 2   | 2   |
| 4 | 4 | 3   | 3   | 3 | 3 | 2 | 999 | 2   |

|   |   |   |   |   |     |   |     |     |
|---|---|---|---|---|-----|---|-----|-----|
| 3 | 4 | 2 | 3 | 1 | 2   | 3 | 2   | 2   |
| 4 | 5 | 3 | 1 | 1 | 3   | 1 | 1   | 2   |
| 3 | 4 | 3 | 2 | 1 | 3   | 1 | 1   | 3   |
| 5 | 5 | 3 | 2 | 2 | 3   | 2 | 1   | 2   |
| 5 | 4 | 2 | 3 | 1 | 3   | 3 | 1   | 2   |
| 3 | 4 | 3 | 1 | 2 | 3   | 2 | 1   | 3   |
| 4 | 4 | 3 | 1 | 2 | 2   | 1 | 999 | 999 |
| 3 | 5 | 3 | 1 | 1 | 2   | 1 | 1   | 3   |
| 4 | 5 | 3 | 1 | 1 | 3   | 1 | 999 | 999 |
| 5 | 5 | 3 | 2 | 3 | 3   | 2 | 1   | 2   |
| 3 | 5 | 2 | 3 | 2 | 3   | 2 | 2   | 2   |
| 5 | 5 | 3 | 1 | 1 | 3   | 1 | 1   | 3   |
| 2 | 1 | 3 | 1 | 3 | 3   | 2 | 2   | 3   |
| 4 | 3 | 3 | 1 | 1 | 3   | 2 | 1   | 2   |
| 3 | 4 | 2 | 1 | 1 | 3   | 1 | 1   | 3   |
| 3 | 5 | 3 | 3 | 1 | 3   | 2 | 1   | 3   |
| 3 | 3 | 3 | 1 | 1 | 2   | 2 | 1   | 2   |
| 4 | 5 | 3 | 1 | 2 | 3   | 1 | 2   | 2   |
| 4 | 5 | 2 | 1 | 1 | 2   | 3 | 1   | 2   |
| 5 | 5 | 3 | 2 | 1 | 3   | 1 | 1   | 2   |
| 4 | 4 | 3 | 1 | 2 | 2   | 2 | 1   | 2   |
| 5 | 5 | 3 | 1 | 1 | 3   | 3 | 1   | 2   |
| 5 | 5 | 3 | 2 | 1 | 3   | 1 | 1   | 1   |
| 5 | 5 | 3 | 3 | 2 | 3   | 2 | 1   | 2   |
| 5 | 5 | 3 | 1 | 1 | 2   | 2 | 1   | 2   |
| 4 | 4 | 3 | 1 | 1 | 2   | 2 | 1   | 3   |
| 2 | 3 | 3 | 1 | 1 | 3   | 1 | 1   | 3   |
| 5 | 5 | 3 | 2 | 1 | 3   | 1 | 1   | 3   |
| 4 | 5 | 3 | 2 | 1 | 3   | 2 | 1   | 2   |
| 5 | 5 | 3 | 2 | 1 | 3   | 1 | 1   | 3   |
| 5 | 5 | 3 | 2 | 2 | 3   | 2 | 1   | 2   |
| 5 | 5 | 3 | 1 | 2 | 3   | 1 | 1   | 3   |
| 5 | 5 | 3 | 2 | 2 | 3   | 2 | 1   | 3   |
| 2 | 2 | 2 | 1 | 1 | 2   | 1 | 2   | 3   |
| 3 | 3 | 3 | 2 | 1 | 2   | 2 | 1   | 2   |
| 5 | 4 | 2 | 2 | 1 | 2   | 1 | 2   | 2   |
| 5 | 4 | 3 | 2 | 1 | 1   | 2 | 1   | 2   |
| 5 | 4 | 2 | 3 | 1 | 3   | 2 | 1   | 3   |
| 5 | 5 | 3 | 1 | 1 | 999 | 1 | 1   | 3   |
| 5 | 5 | 3 | 2 | 1 | 3   | 1 | 1   | 3   |
| 4 | 3 | 3 | 2 | 3 | 3   | 2 | 3   | 2   |
| 5 | 5 | 3 | 1 | 1 | 3   | 1 | 1   | 3   |
| 4 | 5 | 3 | 2 | 1 | 3   | 1 | 1   | 3   |
| 5 | 4 | 3 | 3 | 2 | 999 | 1 | 1   | 2   |
| 4 | 4 | 2 | 3 | 1 | 2   | 1 | 1   | 3   |
| 4 | 4 | 3 | 1 | 1 | 1   | 2 | 999 | 3   |
| 3 | 4 | 2 | 3 | 1 | 2   | 2 | 2   | 2   |
| 4 | 5 | 3 | 1 | 1 | 3   | 1 | 1   | 3   |
| 3 | 5 | 3 | 3 | 1 | 3   | 1 | 1   | 3   |
| 5 | 5 | 3 | 2 | 2 | 3   | 1 | 1   | 3   |





|   |   |   |   |   |   |     |   |     |
|---|---|---|---|---|---|-----|---|-----|
| 2 | 4 | 3 | 1 | 1 | 3 | 2   | 3 | 2   |
| 3 | 3 | 3 | 2 | 3 | 2 | 3   | 2 | 2   |
| 3 | 4 | 3 | 1 | 2 | 3 | 1   | 2 | 2   |
| 5 | 5 | 3 | 3 | 2 | 3 | 2   | 1 | 3   |
| 3 | 3 | 2 | 3 | 3 | 3 | 2   | 2 | 999 |
| 5 | 5 | 3 | 2 | 2 | 2 | 3   | 1 | 3   |
| 4 | 4 | 3 | 3 | 2 | 2 | 3   | 1 | 3   |
| 5 | 5 | 2 | 2 | 1 | 3 | 3   | 1 | 2   |
| 3 | 3 | 3 | 1 | 1 | 1 | 1   | 1 | 3   |
| 2 | 2 | 3 | 3 | 2 | 3 | 1   | 2 | 2   |
| 4 | 5 | 2 | 1 | 2 | 2 | 2   | 1 | 2   |
| 2 | 2 | 3 | 1 | 2 | 3 | 1   | 1 | 2   |
| 5 | 5 | 2 | 1 | 1 | 2 | 1   | 1 | 2   |
| 5 | 5 | 2 | 3 | 3 | 3 | 2   | 1 | 3   |
| 3 | 5 | 3 | 3 | 1 | 3 | 2   | 1 | 3   |
| 5 | 5 | 3 | 1 | 2 | 3 | 1   | 2 | 2   |
| 4 | 5 | 3 | 1 | 1 | 3 | 1   | 1 | 3   |
| 4 | 4 | 3 | 1 | 1 | 2 | 2   | 1 | 3   |
| 1 | 1 | 3 | 1 | 3 | 3 | 2   | 3 | 3   |
| 3 | 4 | 3 | 1 | 2 | 3 | 2   | 1 | 2   |
| 1 | 3 | 2 | 1 | 2 | 3 | 3   | 1 | 2   |
| 4 | 4 | 3 | 2 | 2 | 3 | 2   | 1 | 3   |
| 2 | 2 | 2 | 1 | 1 | 2 | 1   | 1 | 1   |
| 4 | 5 | 3 | 3 | 1 | 3 | 1   | 1 | 2   |
| 3 | 5 | 3 | 2 | 2 | 3 | 3   | 1 | 2   |
| 3 | 3 | 2 | 3 | 3 | 3 | 1   | 1 | 3   |
| 4 | 4 | 3 | 2 | 1 | 3 | 1   | 1 | 2   |
| 3 | 3 | 3 | 1 | 2 | 2 | 1   | 2 | 2   |
| 5 | 5 | 3 | 1 | 1 | 3 | 1   | 3 | 2   |
| 1 | 5 | 3 | 1 | 3 | 3 | 2   | 2 | 3   |
| 2 | 5 | 2 | 1 | 3 | 3 | 2   | 1 | 2   |
| 3 | 5 | 3 | 3 | 2 | 3 | 2   | 1 | 2   |
| 4 | 5 | 3 | 2 | 1 | 2 | 2   | 1 | 2   |
| 4 | 5 | 3 | 1 | 2 | 3 | 1   | 1 | 2   |
| 5 | 3 | 3 | 1 | 2 | 3 | 1   | 2 | 3   |
| 2 | 3 | 2 | 2 | 3 | 2 | 3   | 2 | 3   |
| 4 | 4 | 2 | 3 | 2 | 2 | 2   | 1 | 2   |
| 1 | 5 | 3 | 3 | 1 | 3 | 2   | 3 | 3   |
| 5 | 4 | 3 | 2 | 1 | 2 | 2   | 1 | 2   |
| 5 | 5 | 3 | 3 | 2 | 3 | 2   | 1 | 3   |
| 4 | 5 | 3 | 2 | 1 | 3 | 1   | 1 | 2   |
| 5 | 5 | 3 | 2 | 1 | 3 | 2   | 1 | 2   |
| 4 | 5 | 3 | 2 | 2 | 3 | 2   | 1 | 2   |
| 3 | 5 | 3 | 1 | 1 | 2 | 999 | 1 | 2   |
| 3 | 4 | 3 | 2 | 1 | 3 | 2   | 1 | 3   |
| 3 | 4 | 3 | 1 | 1 | 2 | 2   | 1 | 3   |
| 4 | 5 | 3 | 1 | 3 | 3 | 1   | 2 | 3   |
| 4 | 5 | 3 | 2 | 1 | 3 | 1   | 1 | 3   |
| 2 | 5 | 3 | 3 | 1 | 3 | 2   | 1 | 3   |
| 3 | 5 | 2 | 3 | 1 | 2 | 2   | 1 | 2   |

|   |   |   |   |   |   |   |   |   |
|---|---|---|---|---|---|---|---|---|
| 5 | 5 | 3 | 2 | 1 | 3 | 2 | 1 | 2 |
| 3 | 5 | 3 | 2 | 1 | 2 | 2 | 1 | 2 |
| 2 | 3 | 3 | 1 | 2 | 3 | 1 | 1 | 3 |
| 2 | 4 | 2 | 2 | 3 | 2 | 2 | 3 | 2 |
| 3 | 4 | 3 | 2 | 2 | 2 | 2 | 1 | 2 |
| 5 | 5 | 3 | 2 | 1 | 3 | 1 | 1 | 3 |
| 4 | 5 | 3 | 1 | 1 | 2 | 3 | 1 | 2 |
| 5 | 4 | 2 | 2 | 3 | 2 | 3 | 1 | 2 |
| 4 | 5 | 3 | 2 | 1 | 3 | 2 | 1 | 3 |
| 5 | 5 | 3 | 2 | 3 | 3 | 3 | 3 | 2 |
| 4 | 5 | 3 | 3 | 1 | 3 | 1 | 1 | 3 |
| 5 | 5 | 2 | 1 | 1 | 3 | 3 | 1 | 2 |
| 4 | 4 | 3 | 1 | 1 | 3 | 1 | 1 | 2 |
| 4 | 5 | 3 | 1 | 1 | 3 | 1 | 1 | 3 |
| 5 | 5 | 3 | 2 | 1 | 3 | 3 | 1 | 2 |
| 4 | 5 | 3 | 1 | 1 | 3 | 2 | 1 | 3 |
| 4 | 5 | 2 | 1 | 1 | 3 | 1 | 2 | 3 |
| 4 | 5 | 2 | 3 | 2 | 3 | 1 | 1 | 2 |
| 3 | 3 | 3 | 2 | 1 | 3 | 2 | 1 | 3 |
| 4 | 4 | 3 | 3 | 1 | 3 | 2 | 1 | 3 |
| 3 | 5 | 3 | 2 | 1 | 3 | 1 | 1 | 3 |
| 4 | 5 | 2 | 2 | 1 | 3 | 2 | 1 | 2 |
| 2 | 5 | 3 | 1 | 1 | 3 | 2 | 1 | 3 |
| 5 | 5 | 3 | 2 | 1 | 2 | 2 | 1 | 1 |
| 4 | 5 | 3 | 2 | 1 | 3 | 2 | 1 | 2 |
| 4 | 3 | 3 | 3 | 3 | 3 | 2 | 1 | 2 |
| 2 | 2 | 3 | 2 | 1 | 3 | 1 | 1 | 3 |
| 5 | 5 | 3 | 1 | 2 | 2 | 2 | 1 | 3 |
| 5 | 5 | 2 | 2 | 1 | 2 | 2 | 1 | 2 |
| 3 | 3 | 2 | 3 | 1 | 3 | 2 | 1 | 2 |
| 4 | 4 | 2 | 1 | 1 | 2 | 2 | 1 | 2 |
| 5 | 5 | 3 | 2 | 2 | 3 | 2 | 2 | 2 |
| 4 | 4 | 2 | 2 | 1 | 1 | 3 | 1 | 2 |
| 5 | 5 | 3 | 1 | 2 | 3 | 1 | 1 | 3 |
| 4 | 4 | 3 | 3 | 1 | 3 | 1 | 1 | 3 |
| 5 | 5 | 3 | 1 | 1 | 2 | 2 | 1 | 3 |
| 4 | 4 | 3 | 2 | 1 | 2 | 1 | 1 | 2 |
| 3 | 4 | 3 | 1 | 1 | 3 | 1 | 1 | 2 |
| 4 | 5 | 3 | 2 | 1 | 3 | 2 | 1 | 2 |
| 4 | 5 | 3 | 2 | 2 | 3 | 1 | 1 | 3 |
| 3 | 4 | 2 | 3 | 1 | 2 | 2 | 1 | 3 |
| 5 | 4 | 3 | 3 | 2 | 3 | 1 | 1 | 3 |
| 5 | 5 | 3 | 2 | 1 | 3 | 1 | 1 | 2 |
| 5 | 4 | 2 | 2 | 1 | 3 | 3 | 1 | 3 |
| 5 | 5 | 3 | 1 | 1 | 3 | 1 | 1 | 3 |
| 5 | 5 | 3 | 1 | 1 | 2 | 2 | 1 | 3 |
| 5 | 5 | 3 | 3 | 2 | 3 | 1 | 1 | 3 |
| 5 | 5 | 3 | 3 | 2 | 3 | 1 | 1 | 3 |
| 5 | 5 | 3 | 2 | 1 | 2 | 1 | 1 | 3 |

|   |   |   |   |   |   |     |   |   |
|---|---|---|---|---|---|-----|---|---|
| 4 | 5 | 3 | 2 | 1 | 3 | 1   | 1 | 3 |
| 1 | 2 | 3 | 2 | 1 | 2 | 1   | 2 | 3 |
| 3 | 4 | 2 | 1 | 1 | 3 | 2   | 1 | 3 |
| 4 | 5 | 3 | 1 | 1 | 3 | 1   | 2 | 2 |
| 4 | 4 | 3 | 2 | 1 | 3 | 1   | 2 | 3 |
| 4 | 5 | 3 | 2 | 1 | 3 | 2   | 1 | 2 |
| 4 | 5 | 3 | 3 | 3 | 2 | 2   | 1 | 2 |
| 5 | 5 | 3 | 1 | 1 | 3 | 3   | 1 | 2 |
| 4 | 4 | 3 | 3 | 1 | 3 | 2   | 1 | 2 |
| 4 | 5 | 3 | 2 | 1 | 3 | 999 | 1 | 2 |
| 5 | 5 | 3 | 3 | 1 | 2 | 2   | 1 | 3 |
| 4 | 3 | 3 | 1 | 1 | 2 | 1   | 1 | 2 |
| 5 | 5 | 2 | 1 | 1 | 3 | 2   | 1 | 2 |
| 5 | 5 | 3 | 2 | 1 | 3 | 1   | 1 | 3 |
| 3 | 3 | 2 | 3 | 1 | 3 | 1   | 1 | 2 |
| 4 | 5 | 3 | 1 | 2 | 3 | 2   | 1 | 3 |
| 4 | 4 | 2 | 1 | 1 | 3 | 1   | 1 | 3 |
| 4 | 5 | 3 | 2 | 1 | 3 | 1   | 1 | 3 |
| 5 | 5 | 3 | 1 | 1 | 3 | 3   | 2 | 3 |
| 4 | 5 | 2 | 3 | 1 | 2 | 3   | 2 | 1 |
| 5 | 5 | 3 | 2 | 1 | 3 | 3   | 1 | 2 |
| 4 | 5 | 3 | 3 | 1 | 3 | 2   | 1 | 2 |
| 3 | 3 | 3 | 2 | 1 | 2 | 1   | 2 | 3 |
| 5 | 5 | 3 | 1 | 1 | 3 | 2   | 2 | 3 |
| 4 | 5 | 3 | 2 | 1 | 3 | 1   | 1 | 3 |
| 4 | 4 | 3 | 1 | 1 | 3 | 2   | 1 | 3 |
| 5 | 5 | 2 | 3 | 1 | 3 | 3   | 1 | 2 |
| 3 | 5 | 2 | 2 | 1 | 2 | 2   | 1 | 2 |
| 4 | 4 | 3 | 1 | 1 | 3 | 2   | 1 | 2 |
| 5 | 5 | 3 | 3 | 1 | 3 | 2   | 2 | 3 |
| 1 | 5 | 2 | 2 | 1 | 2 | 2   | 1 | 3 |
| 2 | 3 | 2 | 1 | 2 | 2 | 2   | 2 | 3 |
| 4 | 4 | 3 | 2 | 2 | 2 | 1   | 1 | 2 |
| 4 | 5 | 3 | 2 | 3 | 3 | 2   | 1 | 3 |
| 4 | 4 | 3 | 3 | 2 | 2 | 3   | 1 | 2 |
| 3 | 5 | 3 | 2 | 3 | 3 | 2   | 2 | 3 |
| 3 | 3 | 3 | 2 | 2 | 2 | 3   | 2 | 2 |
| 3 | 3 | 2 | 2 | 3 | 2 | 3   | 1 | 2 |
| 3 | 5 | 3 | 1 | 2 | 3 | 1   | 1 | 2 |
| 4 | 3 | 3 | 2 | 2 | 3 | 1   | 1 | 2 |
| 4 | 5 | 3 | 3 | 3 | 2 | 2   | 1 | 3 |
| 2 | 5 | 3 | 1 | 3 | 3 | 3   | 2 | 3 |
| 4 | 3 | 3 | 3 | 3 | 3 | 2   | 1 | 2 |
| 4 | 4 | 3 | 2 | 2 | 3 | 2   | 1 | 2 |
| 1 | 4 | 3 | 1 | 3 | 3 | 3   | 1 | 3 |
| 1 | 1 | 3 | 3 | 1 | 3 | 1   | 2 | 2 |
| 2 | 5 | 2 | 1 | 2 | 3 | 2   | 1 | 2 |
| 4 | 3 | 3 | 2 | 1 | 3 | 2   | 1 | 3 |
| 5 | 5 | 3 | 2 | 1 | 3 | 1   | 1 | 2 |
| 2 | 2 | 3 | 2 | 3 | 3 | 2   | 1 | 3 |

|   |     |   |   |   |   |   |     |   |
|---|-----|---|---|---|---|---|-----|---|
| 5 | 5   | 3 | 2 | 1 | 2 | 3 | 2   | 2 |
| 4 | 4   | 3 | 2 | 2 | 2 | 2 | 1   | 2 |
| 4 | 5   | 2 | 2 | 1 | 3 | 3 | 2   | 1 |
| 4 | 3   | 3 | 2 | 2 | 3 | 1 | 1   | 3 |
| 3 | 4   | 3 | 3 | 1 | 3 | 1 | 1   | 2 |
| 4 | 3   | 2 | 1 | 2 | 3 | 3 | 1   | 3 |
| 5 | 5   | 3 | 1 | 1 | 3 | 2 | 1   | 2 |
| 5 | 5   | 3 | 2 | 1 | 3 | 2 | 1   | 3 |
| 4 | 5   | 3 | 2 | 2 | 2 | 1 | 999 | 2 |
| 3 | 5   | 3 | 2 | 1 | 3 | 1 | 1   | 3 |
| 4 | 4   | 3 | 2 | 2 | 3 | 1 | 1   | 3 |
| 4 | 4   | 3 | 1 | 1 | 3 | 1 | 1   | 3 |
| 5 | 5   | 3 | 1 | 1 | 2 | 2 | 3   | 3 |
| 4 | 5   | 3 | 1 | 1 | 3 | 2 | 1   | 2 |
| 4 | 5   | 3 | 3 | 3 | 3 | 2 | 1   | 2 |
| 4 | 5   | 3 | 1 | 1 | 3 | 2 | 1   | 3 |
| 4 | 4   | 2 | 1 | 1 | 3 | 1 | 2   | 2 |
| 4 | 3   | 3 | 1 | 2 | 3 | 3 | 2   | 2 |
| 5 | 5   | 3 | 2 | 1 | 3 | 2 | 1   | 3 |
| 1 | 2   | 3 | 2 | 1 | 3 | 1 | 1   | 2 |
| 5 | 5   | 2 | 2 | 1 | 2 | 3 | 1   | 2 |
| 4 | 5   | 3 | 2 | 2 | 3 | 1 | 1   | 3 |
| 4 | 5   | 3 | 2 | 2 | 3 | 2 | 1   | 3 |
| 4 | 4   | 2 | 2 | 1 | 2 | 1 | 2   | 1 |
| 4 | 5   | 3 | 1 | 1 | 2 | 1 | 1   | 3 |
| 5 | 5   | 3 | 1 | 1 | 3 | 1 | 3   | 2 |
| 4 | 4   | 3 | 3 | 3 | 2 | 2 | 2   | 2 |
| 4 | 4   | 3 | 2 | 2 | 2 | 2 | 1   | 2 |
| 4 | 4   | 3 | 1 | 2 | 3 | 2 | 2   | 3 |
| 4 | 4   | 3 | 2 | 3 | 3 | 1 | 1   | 3 |
| 4 | 5   | 3 | 1 | 2 | 3 | 1 | 1   | 2 |
| 5 | 999 | 3 | 2 | 1 | 3 | 2 | 2   | 3 |
| 3 | 5   | 3 | 1 | 1 | 3 | 1 | 1   | 3 |
| 4 | 5   | 3 | 2 | 1 | 2 | 3 | 1   | 3 |
| 4 | 3   | 3 | 2 | 2 | 3 | 2 | 1   | 2 |
| 4 | 4   | 2 | 1 | 1 | 1 | 2 | 1   | 3 |
| 5 | 5   | 3 | 2 | 3 | 3 | 1 | 1   | 2 |
| 4 | 5   | 2 | 3 | 1 | 2 | 2 | 1   | 2 |
| 4 | 5   | 3 | 2 | 1 | 3 | 2 | 1   | 2 |
| 5 | 5   | 3 | 2 | 1 | 3 | 2 | 1   | 3 |
| 5 | 5   | 3 | 2 | 1 | 3 | 1 | 1   | 3 |
| 4 | 4   | 3 | 2 | 1 | 3 | 1 | 1   | 2 |
| 2 | 4   | 2 | 2 | 1 | 2 | 3 | 1   | 1 |
| 3 | 5   | 2 | 3 | 2 | 2 | 1 | 1   | 3 |
| 2 | 2   | 2 | 3 | 2 | 3 | 3 | 1   | 3 |
| 4 | 4   | 3 | 2 | 1 | 3 | 1 | 1   | 2 |
| 5 | 5   | 3 | 3 | 2 | 3 | 2 | 2   | 2 |
| 3 | 4   | 3 | 2 | 1 | 2 | 2 | 1   | 2 |
| 4 | 5   | 3 | 1 | 1 | 2 | 1 | 1   | 3 |
| 5 | 5   | 3 | 2 | 1 | 3 | 1 | 1   | 3 |

|     |   |   |     |   |   |   |   |     |
|-----|---|---|-----|---|---|---|---|-----|
| 5   | 5 | 3 | 1   | 1 | 3 | 2 | 1 | 999 |
| 4   | 5 | 3 | 1   | 1 | 2 | 2 | 1 | 2   |
| 5   | 5 | 3 | 1   | 2 | 2 | 2 | 1 | 3   |
| 5   | 5 | 3 | 1   | 1 | 3 | 1 | 1 | 3   |
| 3   | 4 | 3 | 1   | 1 | 3 | 1 | 1 | 3   |
| 4   | 5 | 3 | 1   | 1 | 3 | 1 | 1 | 2   |
| 5   | 5 | 3 | 2   | 2 | 3 | 1 | 1 | 3   |
| 4   | 4 | 2 | 1   | 1 | 3 | 2 | 1 | 2   |
| 5   | 5 | 3 | 2   | 1 | 3 | 1 | 1 | 2   |
| 4   | 4 | 3 | 2   | 3 | 3 | 1 | 1 | 3   |
| 4   | 4 | 2 | 2   | 1 | 3 | 1 | 1 | 3   |
| 1   | 4 | 3 | 2   | 3 | 3 | 2 | 1 | 2   |
| 4   | 3 | 3 | 3   | 1 | 2 | 2 | 1 | 2   |
| 3   | 4 | 2 | 2   | 1 | 2 | 1 | 2 | 2   |
| 5   | 4 | 3 | 2   | 2 | 3 | 3 | 1 | 2   |
| 3   | 5 | 2 | 3   | 2 | 3 | 3 | 1 | 3   |
| 3   | 2 | 3 | 3   | 2 | 2 | 2 | 1 | 3   |
| 2   | 3 | 2 | 1   | 3 | 2 | 1 | 2 | 3   |
| 2   | 4 | 3 | 1   | 2 | 2 | 3 | 1 | 2   |
| 4   | 5 | 3 | 1   | 1 | 2 | 1 | 1 | 3   |
| 4   | 4 | 3 | 3   | 1 | 3 | 1 | 2 | 3   |
| 4   | 5 | 3 | 2   | 3 | 3 | 1 | 1 | 3   |
| 2   | 3 | 3 | 2   | 2 | 3 | 1 | 1 | 3   |
| 4   | 4 | 2 | 2   | 1 | 2 | 1 | 1 | 2   |
| 1   | 2 | 3 | 999 | 1 | 2 | 2 | 2 | 2   |
| 4   | 5 | 3 | 1   | 1 | 2 | 1 | 1 | 2   |
| 3   | 2 | 3 | 1   | 1 | 2 | 1 | 3 | 3   |
| 2   | 2 | 2 | 2   | 1 | 2 | 3 | 1 | 3   |
| 2   | 2 | 1 | 1   | 1 | 1 | 2 | 1 | 1   |
| 2   | 5 | 3 | 2   | 3 | 1 | 1 | 1 | 2   |
| 4   | 4 | 3 | 1   | 1 | 3 | 1 | 1 | 3   |
| 999 | 2 | 3 | 2   | 1 | 3 | 2 | 2 | 2   |
| 4   | 5 | 3 | 2   | 1 | 2 | 3 | 2 | 3   |
| 5   | 4 | 2 | 1   | 1 | 3 | 2 | 1 | 2   |
| 3   | 1 | 2 | 1   | 2 | 3 | 3 | 1 | 1   |
| 5   | 5 | 2 | 2   | 2 | 3 | 3 | 1 | 2   |
| 2   | 3 | 3 | 1   | 1 | 1 | 1 | 2 | 3   |
| 2   | 5 | 3 | 2   | 1 | 3 | 2 | 1 | 3   |
| 2   | 4 | 2 | 3   | 1 | 2 | 1 | 1 | 2   |
| 2   | 5 | 3 | 2   | 1 | 3 | 1 | 1 | 2   |
| 1   | 3 | 3 | 1   | 1 | 3 | 3 | 1 | 3   |
| 3   | 4 | 3 | 1   | 2 | 3 | 1 | 1 | 3   |
| 4   | 2 | 2 | 2   | 1 | 3 | 3 | 1 | 2   |
| 4   | 5 | 2 | 1   | 1 | 2 | 1 | 1 | 3   |
| 4   | 3 | 3 | 1   | 1 | 3 | 1 | 1 | 3   |
| 1   | 4 | 2 | 3   | 2 | 3 | 3 | 1 | 2   |
| 5   | 1 | 3 | 2   | 1 | 3 | 1 | 2 | 2   |
| 3   | 3 | 2 | 1   | 2 | 3 | 1 | 1 | 3   |
| 2   | 4 | 2 | 2   | 3 | 2 | 1 | 3 | 999 |
| 1   | 3 | 3 | 1   | 1 | 3 | 1 | 3 | 3   |

|   |   |   |   |   |   |   |   |   |
|---|---|---|---|---|---|---|---|---|
| 3 | 4 | 3 | 3 | 1 | 2 | 2 | 3 | 3 |
| 4 | 3 | 3 | 1 | 1 | 2 | 1 | 1 | 3 |
| 1 | 2 | 2 | 3 | 1 | 2 | 1 | 2 | 3 |
| 3 | 2 | 3 | 2 | 1 | 3 | 2 | 2 | 3 |
| 2 | 3 | 3 | 1 | 1 | 3 | 1 | 1 | 3 |
| 2 | 3 | 2 | 1 | 1 | 2 | 1 | 3 | 3 |
| 5 | 5 | 2 | 3 | 2 | 2 | 3 | 1 | 1 |
| 5 | 5 | 3 | 1 | 1 | 3 | 1 | 1 | 3 |
| 4 | 5 | 3 | 1 | 1 | 3 | 3 | 1 | 2 |
| 2 | 3 | 2 | 3 | 3 | 3 | 3 | 2 | 2 |
| 2 | 1 | 2 | 1 | 1 | 2 | 1 | 1 | 2 |
| 4 | 5 | 2 | 2 | 1 | 3 | 3 | 1 | 3 |
| 4 | 5 | 3 | 1 | 1 | 3 | 2 | 1 | 3 |
| 1 | 4 | 3 | 2 | 1 | 3 | 2 | 2 | 2 |
| 5 | 4 | 3 | 3 | 1 | 2 | 1 | 1 | 3 |
| 4 | 4 | 3 | 2 | 1 | 3 | 1 | 1 | 3 |
| 4 | 5 | 2 | 2 | 1 | 3 | 2 | 1 | 3 |
| 2 | 3 | 3 | 1 | 1 | 3 | 2 | 1 | 3 |
| 5 | 5 | 3 | 3 | 1 | 3 | 1 | 1 | 3 |
| 5 | 5 | 3 | 1 | 2 | 2 | 1 | 1 | 3 |
| 4 | 5 | 3 | 2 | 1 | 3 | 1 | 1 | 3 |
| 2 | 1 | 3 | 1 | 1 | 3 | 1 | 1 | 2 |
| 5 | 5 | 3 | 2 | 1 | 3 | 2 | 1 | 3 |
| 4 | 5 | 3 | 2 | 1 | 2 | 1 | 1 | 2 |
| 4 | 4 | 2 | 3 | 1 | 2 | 3 | 1 | 2 |
| 4 | 5 | 3 | 1 | 1 | 3 | 1 | 1 | 2 |
| 3 | 5 | 2 | 2 | 1 | 2 | 3 | 1 | 2 |
| 3 | 5 | 2 | 1 | 1 | 3 | 3 | 1 | 3 |
| 4 | 4 | 3 | 3 | 2 | 3 | 1 | 1 | 3 |
| 4 | 3 | 3 | 2 | 1 | 3 | 1 | 1 | 3 |
| 5 | 5 | 3 | 1 | 1 | 3 | 1 | 2 | 3 |
| 5 | 5 | 3 | 3 | 1 | 3 | 2 | 1 | 3 |
| 4 | 3 | 3 | 2 | 1 | 3 | 2 | 1 | 3 |
| 4 | 5 | 2 | 2 | 1 | 2 | 2 | 1 | 2 |
| 1 | 5 | 1 | 1 | 2 | 1 | 1 | 3 | 3 |
| 3 | 3 | 3 | 2 | 1 | 3 | 3 | 2 | 2 |
| 3 | 4 | 2 | 3 | 1 | 2 | 2 | 3 | 3 |
| 1 | 2 | 3 | 1 | 1 | 3 | 1 | 1 | 3 |
| 2 | 2 | 3 | 2 | 1 | 2 | 3 | 1 | 3 |
| 1 | 2 | 2 | 3 | 2 | 1 | 1 | 1 | 3 |
| 5 | 4 | 3 | 1 | 1 | 3 | 2 | 1 | 2 |
| 5 | 4 | 2 | 3 | 1 | 3 | 1 | 1 | 2 |
| 3 | 3 | 3 | 2 | 1 | 3 | 1 | 1 | 2 |
| 4 | 5 | 3 | 2 | 1 | 3 | 1 | 1 | 2 |
| 2 | 2 | 3 | 1 | 1 | 2 | 2 | 1 | 2 |
| 3 | 5 | 3 | 1 | 1 | 3 | 1 | 1 | 3 |
| 3 | 3 | 2 | 3 | 1 | 2 | 3 | 1 | 2 |
| 3 | 5 | 2 | 2 | 1 | 2 | 2 | 1 | 3 |
| 4 | 5 | 2 | 1 | 1 | 2 | 1 | 1 | 2 |
| 5 | 5 | 3 | 3 | 3 | 1 | 3 | 3 | 1 |

|   |   |   |   |   |   |   |   |   |
|---|---|---|---|---|---|---|---|---|
| 1 | 1 | 3 | 3 | 1 | 1 | 1 | 2 | 2 |
| 3 | 4 | 3 | 3 | 1 | 3 | 2 | 1 | 2 |
| 1 | 5 | 2 | 1 | 2 | 3 | 3 | 2 | 2 |
| 5 | 5 | 3 | 3 | 1 | 3 | 2 | 1 | 1 |
| 2 | 3 | 2 | 1 | 2 | 1 | 2 | 1 | 2 |
| 3 | 4 | 3 | 2 | 1 | 3 | 2 | 1 | 1 |
| 1 | 1 | 1 | 2 | 2 | 1 | 3 | 2 | 2 |
| 5 | 5 | 3 | 2 | 2 | 3 | 2 | 1 | 3 |
| 3 | 3 | 3 | 1 | 1 | 3 | 3 | 2 | 3 |
| 5 | 3 | 2 | 3 | 2 | 2 | 1 | 1 | 3 |
| 3 | 3 | 2 | 1 | 1 | 3 | 1 | 1 | 2 |
| 2 | 5 | 3 | 2 | 1 | 2 | 1 | 1 | 2 |
| 2 | 2 | 3 | 2 | 2 | 3 | 2 | 1 | 2 |
| 4 | 5 | 2 | 2 | 3 | 3 | 1 | 2 | 3 |
| 5 | 4 | 3 | 2 | 1 | 3 | 1 | 1 | 3 |
| 4 | 5 | 3 | 3 | 2 | 3 | 3 | 1 | 2 |
| 4 | 5 | 3 | 1 | 1 | 2 | 2 | 1 | 3 |
| 2 | 4 | 3 | 1 | 2 | 3 | 1 | 2 | 3 |
| 3 | 4 | 3 | 1 | 2 | 2 | 2 | 1 | 2 |
| 2 | 3 | 3 | 1 | 2 | 2 | 1 | 1 | 2 |
| 1 | 2 | 2 | 1 | 1 | 2 | 1 | 1 | 1 |
| 5 | 5 | 2 | 3 | 2 | 2 | 2 | 2 | 2 |
| 3 | 3 | 3 | 1 | 1 | 2 | 1 | 2 | 2 |
| 2 | 3 | 3 | 3 | 1 | 2 | 3 | 3 | 1 |
| 3 | 3 | 2 | 3 | 2 | 2 | 3 | 1 | 2 |
| 3 | 4 | 2 | 3 | 1 | 2 | 2 | 1 | 3 |
| 4 | 4 | 3 | 1 | 1 | 3 | 1 | 1 | 3 |
| 4 | 3 | 3 | 2 | 1 | 3 | 1 | 1 | 3 |
| 3 | 5 | 3 | 2 | 1 | 2 | 2 | 1 | 2 |
| 3 | 5 | 3 | 2 | 2 | 3 | 3 | 1 | 3 |
| 4 | 4 | 3 | 2 | 2 | 3 | 2 | 1 | 3 |
| 3 | 5 | 3 | 3 | 1 | 3 | 3 | 1 | 2 |
| 3 | 4 | 3 | 2 | 1 | 3 | 1 | 1 | 3 |
| 3 | 4 | 3 | 2 | 2 | 2 | 2 | 1 | 2 |
| 4 | 3 | 3 | 1 | 1 | 2 | 2 | 2 | 2 |
| 5 | 5 | 3 | 1 | 1 | 2 | 2 | 1 | 3 |
| 1 | 4 | 3 | 2 | 2 | 2 | 1 | 1 | 2 |
| 4 | 4 | 3 | 2 | 1 | 2 | 2 | 2 | 2 |
| 3 | 4 | 2 | 2 | 1 | 3 | 2 | 1 | 2 |
| 2 | 2 | 2 | 3 | 1 | 2 | 3 | 1 | 2 |
| 3 | 3 | 3 | 2 | 1 | 3 | 2 | 1 | 2 |
| 3 | 3 | 3 | 2 | 1 | 2 | 1 | 1 | 2 |
| 4 | 3 | 3 | 1 | 1 | 3 | 1 | 1 | 2 |
| 3 | 2 | 3 | 3 | 1 | 3 | 2 | 1 | 3 |
| 4 | 5 | 2 | 1 | 1 | 2 | 3 | 2 | 3 |
| 5 | 5 | 2 | 3 | 1 | 2 | 2 | 3 | 2 |
| 1 | 2 | 2 | 1 | 1 | 3 | 3 | 1 | 2 |
| 5 | 3 | 2 | 1 | 2 | 2 | 3 | 2 | 2 |
| 2 | 3 | 2 | 1 | 1 | 2 | 1 | 1 | 3 |
| 2 | 4 | 3 | 2 | 1 | 3 | 1 | 1 | 3 |

|     |     |   |   |   |   |   |   |     |
|-----|-----|---|---|---|---|---|---|-----|
| 4   | 5   | 3 | 2 | 2 | 2 | 2 | 1 | 1   |
| 3   | 3   | 3 | 1 | 1 | 3 | 1 | 2 | 3   |
| 4   | 4   | 2 | 1 | 1 | 3 | 1 | 1 | 3   |
| 2   | 3   | 2 | 1 | 1 | 3 | 1 | 1 | 2   |
| 3   | 3   | 2 | 3 | 1 | 3 | 2 | 3 | 1   |
| 4   | 4   | 3 | 2 | 2 | 2 | 2 | 1 | 2   |
| 2   | 1   | 1 | 2 | 1 | 1 | 2 | 3 | 2   |
| 4   | 5   | 3 | 1 | 1 | 2 | 1 | 2 | 2   |
| 3   | 3   | 3 | 3 | 1 | 3 | 1 | 1 | 2   |
| 2   | 4   | 3 | 3 | 1 | 2 | 3 | 2 | 2   |
| 5   | 5   | 2 | 1 | 1 | 2 | 2 | 1 | 2   |
| 1   | 5   | 3 | 1 | 2 | 2 | 2 | 1 | 3   |
| 4   | 5   | 2 | 1 | 1 | 3 | 2 | 1 | 2   |
| 3   | 3   | 2 | 2 | 1 | 3 | 1 | 1 | 2   |
| 1   | 1   | 3 | 1 | 1 | 3 | 1 | 1 | 2   |
| 1   | 5   | 3 | 3 | 1 | 3 | 1 | 1 | 3   |
| 2   | 5   | 3 | 1 | 1 | 2 | 1 | 1 | 3   |
| 4   | 5   | 3 | 2 | 1 | 3 | 1 | 1 | 3   |
| 999 | 999 | 3 | 2 | 1 | 3 | 2 | 1 | 3   |
| 5   | 5   | 3 | 2 | 1 | 3 | 3 | 1 | 2   |
| 3   | 5   | 2 | 3 | 1 | 3 | 3 | 1 | 1   |
| 1   | 3   | 3 | 1 | 1 | 3 | 1 | 1 | 3   |
| 1   | 2   | 2 | 3 | 1 | 2 | 1 | 2 | 2   |
| 1   | 2   | 2 | 1 | 1 | 2 | 2 | 1 | 3   |
| 5   | 5   | 3 | 2 | 1 | 3 | 3 | 1 | 3   |
| 3   | 3   | 3 | 1 | 1 | 2 | 1 | 1 | 2   |
| 5   | 5   | 3 | 1 | 2 | 2 | 3 | 1 | 3   |
| 4   | 4   | 3 | 1 | 1 | 2 | 2 | 1 | 3   |
| 3   | 5   | 3 | 2 | 1 | 2 | 2 | 1 | 2   |
| 4   | 3   | 3 | 2 | 1 | 3 | 2 | 1 | 3   |
| 4   | 5   | 3 | 3 | 1 | 3 | 1 | 1 | 999 |
| 4   | 5   | 3 | 1 | 1 | 2 | 1 | 1 | 3   |
| 3   | 4   | 3 | 2 | 1 | 2 | 2 | 1 | 2   |
| 3   | 2   | 3 | 3 | 1 | 3 | 3 | 3 | 2   |
| 1   | 4   | 3 | 2 | 1 | 3 | 1 | 1 | 3   |
| 5   | 5   | 3 | 3 | 1 | 2 | 1 | 1 | 2   |
| 3   | 5   | 3 | 1 | 2 | 2 | 2 | 1 | 2   |
| 5   | 4   | 3 | 1 | 1 | 1 | 2 | 1 | 3   |
| 2   | 2   | 3 | 1 | 1 | 2 | 3 | 3 | 1   |
| 4   | 5   | 2 | 1 | 1 | 3 | 3 | 2 | 2   |
| 2   | 3   | 2 | 2 | 1 | 2 | 2 | 1 | 2   |
| 3   | 3   | 3 | 2 | 1 | 2 | 1 | 1 | 2   |
| 4   | 4   | 3 | 1 | 1 | 3 | 2 | 1 | 3   |
| 5   | 5   | 3 | 3 | 2 | 3 | 2 | 1 | 3   |
| 3   | 5   | 3 | 2 | 2 | 2 | 1 | 1 | 2   |
| 3   | 3   | 3 | 1 | 2 | 2 | 2 | 1 | 2   |
| 4   | 5   | 3 | 1 | 2 | 2 | 3 | 1 | 3   |
| 3   | 3   | 2 | 3 | 2 | 1 | 2 | 3 | 2   |
| 2   | 3   | 3 | 1 | 1 | 2 | 2 | 2 | 3   |
| 2   | 2   | 3 | 2 | 1 | 3 | 1 | 1 | 3   |



|     |   |   |   |   |   |   |   |   |
|-----|---|---|---|---|---|---|---|---|
| 2   | 4 | 2 | 3 | 1 | 2 | 2 | 1 | 3 |
| 2   | 3 | 3 | 1 | 1 | 1 | 1 | 1 | 2 |
| 4   | 4 | 3 | 1 | 1 | 3 | 2 | 1 | 2 |
| 5   | 4 | 3 | 3 | 1 | 1 | 2 | 1 | 2 |
| 3   | 3 | 3 | 2 | 1 | 2 | 1 | 1 | 2 |
| 3   | 3 | 3 | 2 | 1 | 2 | 2 | 1 | 2 |
| 2   | 4 | 3 | 2 | 2 | 2 | 2 | 2 | 2 |
| 3   | 2 | 2 | 2 | 1 | 2 | 2 | 1 | 2 |
| 4   | 5 | 3 | 2 | 1 | 3 | 2 | 2 | 2 |
| 4   | 4 | 3 | 1 | 1 | 3 | 1 | 1 | 2 |
| 4   | 5 | 3 | 1 | 1 | 2 | 2 | 1 | 2 |
| 4   | 3 | 3 | 1 | 1 | 3 | 1 | 1 | 3 |
| 1   | 3 | 3 | 1 | 1 | 2 | 2 | 1 | 2 |
| 4   | 4 | 3 | 2 | 1 | 3 | 1 | 1 | 3 |
| 4   | 4 | 3 | 2 | 1 | 3 | 2 | 1 | 3 |
| 3   | 4 | 2 | 3 | 1 | 3 | 2 | 2 | 3 |
| 3   | 4 | 3 | 2 | 1 | 3 | 2 | 2 | 3 |
| 3   | 3 | 3 | 1 | 1 | 3 | 1 | 1 | 3 |
| 2   | 3 | 2 | 3 | 2 | 3 | 1 | 1 | 2 |
| 5   | 4 | 3 | 1 | 2 | 2 | 3 | 1 | 2 |
| 5   | 5 | 3 | 3 | 1 | 3 | 2 | 1 | 2 |
| 5   | 5 | 3 | 2 | 1 | 3 | 1 | 1 | 3 |
| 5   | 4 | 3 | 2 | 2 | 3 | 2 | 1 | 2 |
| 2   | 2 | 2 | 2 | 1 | 2 | 2 | 1 | 2 |
| 999 | 3 | 3 | 2 | 1 | 3 | 2 | 1 | 2 |
| 2   | 4 | 3 | 2 | 1 | 3 | 1 | 1 | 2 |
| 3   | 3 | 3 | 1 | 2 | 2 | 1 | 1 | 2 |
| 3   | 3 | 2 | 3 | 1 | 1 | 1 | 1 | 3 |
| 4   | 5 | 3 | 1 | 1 | 3 | 1 | 1 | 3 |
| 4   | 4 | 3 | 2 | 1 | 3 | 2 | 1 | 2 |
| 1   | 2 | 2 | 1 | 2 | 2 | 3 | 1 | 2 |
| 4   | 5 | 2 | 3 | 2 | 2 | 1 | 1 | 2 |
| 3   | 3 | 3 | 1 | 2 | 2 | 1 | 1 | 2 |
| 2   | 4 | 3 | 2 | 1 | 3 | 2 | 1 | 2 |
| 3   | 3 | 2 | 2 | 2 | 2 | 3 | 1 | 3 |
| 4   | 5 | 2 | 2 | 1 | 2 | 2 | 1 | 3 |
| 1   | 5 | 3 | 3 | 2 | 1 | 3 | 1 | 2 |
| 3   | 3 | 2 | 2 | 1 | 2 | 2 | 1 | 2 |
| 3   | 5 | 3 | 2 | 1 | 2 | 2 | 1 | 2 |
| 5   | 5 | 2 | 3 | 1 | 2 | 3 | 1 | 2 |
| 4   | 4 | 3 | 2 | 1 | 3 | 3 | 2 | 3 |
| 4   | 4 | 2 | 2 | 1 | 2 | 3 | 1 | 2 |
| 4   | 5 | 3 | 2 | 1 | 2 | 2 | 1 | 1 |
| 4   | 5 | 3 | 1 | 2 | 3 | 2 | 1 | 3 |
| 3   | 3 | 3 | 3 | 2 | 3 | 3 | 1 | 2 |
| 4   | 4 | 3 | 3 | 1 | 3 | 2 | 1 | 2 |
| 4   | 3 | 3 | 1 | 1 | 2 | 1 | 1 | 3 |
| 2   | 3 | 2 | 3 | 1 | 2 | 1 | 1 | 2 |
| 3   | 4 | 3 | 2 | 1 | 3 | 1 | 2 | 2 |
| 4   | 5 | 3 | 1 | 1 | 3 | 1 | 2 | 2 |

|   |   |   |   |   |   |   |   |     |
|---|---|---|---|---|---|---|---|-----|
| 4 | 5 | 2 | 2 | 1 | 2 | 3 | 1 | 1   |
| 3 | 4 | 3 | 3 | 1 | 3 | 1 | 1 | 999 |
| 3 | 4 | 2 | 1 | 1 | 2 | 2 | 2 | 3   |
| 3 | 5 | 3 | 1 | 1 | 2 | 3 | 1 | 3   |
| 4 | 4 | 3 | 1 | 1 | 3 | 1 | 1 | 3   |
| 2 | 3 | 3 | 3 | 1 | 3 | 3 | 1 | 2   |
| 3 | 4 | 3 | 1 | 1 | 3 | 2 | 1 | 3   |
| 2 | 4 | 3 | 3 | 1 | 3 | 1 | 1 | 2   |
| 1 | 3 | 3 | 2 | 1 | 3 | 2 | 3 | 3   |
| 3 | 3 | 3 | 2 | 1 | 2 | 1 | 1 | 2   |
| 2 | 3 | 3 | 1 | 1 | 3 | 3 | 1 | 2   |
| 3 | 4 | 3 | 1 | 1 | 3 | 1 | 1 | 2   |
| 2 | 5 | 3 | 2 | 1 | 3 | 2 | 1 | 2   |
| 1 | 4 | 3 | 1 | 1 | 3 | 1 | 1 | 3   |
| 3 | 4 | 2 | 1 | 1 | 3 | 3 | 1 | 2   |
| 3 | 3 | 3 | 1 | 1 | 3 | 2 | 1 | 3   |
| 4 | 3 | 3 | 1 | 1 | 3 | 2 | 1 | 2   |
| 2 | 3 | 3 | 2 | 1 | 2 | 3 | 2 | 2   |
| 2 | 3 | 3 | 2 | 1 | 3 | 3 | 1 | 2   |
| 3 | 3 | 2 | 2 | 1 | 3 | 2 | 1 | 2   |
| 3 | 3 | 3 | 2 | 1 | 3 | 2 | 2 | 2   |
| 2 | 2 | 3 | 2 | 2 | 2 | 2 | 1 | 2   |
| 3 | 4 | 2 | 1 | 1 | 3 | 2 | 1 | 3   |
| 3 | 3 | 2 | 1 | 1 | 2 | 1 | 1 | 3   |
| 4 | 4 | 3 | 2 | 1 | 3 | 1 | 1 | 2   |
| 4 | 4 | 3 | 2 | 1 | 3 | 3 | 1 | 2   |
| 4 | 4 | 2 | 1 | 1 | 3 | 2 | 1 | 3   |
| 4 | 4 | 3 | 2 | 1 | 3 | 1 | 1 | 2   |
| 3 | 3 | 3 | 1 | 1 | 3 | 2 | 1 | 3   |
| 4 | 5 | 3 | 2 | 1 | 3 | 1 | 1 | 2   |
| 3 | 4 | 3 | 2 | 1 | 2 | 1 | 1 | 2   |
| 5 | 5 | 3 | 2 | 1 | 3 | 1 | 1 | 2   |
| 2 | 4 | 2 | 1 | 1 | 3 | 2 | 1 | 2   |
| 3 | 2 | 3 | 2 | 1 | 2 | 3 | 1 | 2   |
| 4 | 4 | 3 | 2 | 1 | 2 | 2 | 1 | 2   |
| 5 | 5 | 3 | 1 | 2 | 2 | 1 | 2 | 2   |
| 4 | 4 | 2 | 2 | 2 | 3 | 2 | 1 | 2   |
| 3 | 4 | 2 | 3 | 1 | 2 | 3 | 1 | 3   |
| 4 | 5 | 2 | 3 | 3 | 1 | 3 | 3 | 1   |
| 4 | 3 | 3 | 2 | 2 | 3 | 3 | 1 | 3   |
| 5 | 5 | 3 | 1 | 1 | 3 | 1 | 1 | 3   |
| 3 | 3 | 3 | 1 | 2 | 3 | 1 | 1 | 2   |
| 3 | 2 | 2 | 1 | 1 | 3 | 2 | 1 | 2   |
| 5 | 5 | 3 | 2 | 1 | 2 | 1 | 1 | 2   |
| 4 | 4 | 2 | 2 | 1 | 2 | 2 | 1 | 2   |
| 5 | 5 | 3 | 2 | 1 | 3 | 2 | 1 | 2   |
| 5 | 5 | 3 | 3 | 3 | 3 | 1 | 2 | 1   |
| 3 | 4 | 3 | 1 | 1 | 2 | 1 | 1 | 3   |
| 4 | 5 | 3 | 1 | 2 | 3 | 1 | 1 | 3   |
| 1 | 3 | 1 | 1 | 2 | 3 | 3 | 1 | 1   |

|     |   |   |   |   |   |   |   |   |
|-----|---|---|---|---|---|---|---|---|
| 2   | 3 | 2 | 2 | 1 | 3 | 3 | 1 | 3 |
| 4   | 4 | 3 | 2 | 1 | 3 | 1 | 1 | 2 |
| 3   | 4 | 2 | 3 | 1 | 3 | 2 | 2 | 2 |
| 5   | 5 | 3 | 1 | 2 | 3 | 1 | 1 | 3 |
| 2   | 3 | 3 | 2 | 1 | 3 | 3 | 1 | 2 |
| 4   | 4 | 3 | 3 | 2 | 3 | 2 | 1 | 2 |
| 4   | 4 | 3 | 2 | 2 | 3 | 1 | 1 | 2 |
| 5   | 5 | 2 | 3 | 2 | 3 | 2 | 1 | 3 |
| 3   | 3 | 3 | 3 | 2 | 2 | 2 | 1 | 2 |
| 4   | 3 | 3 | 2 | 1 | 3 | 2 | 1 | 2 |
| 3   | 3 | 2 | 2 | 1 | 3 | 1 | 2 | 2 |
| 3   | 3 | 2 | 1 | 2 | 2 | 1 | 1 | 2 |
| 4   | 4 | 3 | 1 | 1 | 2 | 2 | 1 | 3 |
| 4   | 5 | 3 | 2 | 1 | 2 | 1 | 1 | 2 |
| 2   | 4 | 2 | 2 | 2 | 3 | 2 | 2 | 2 |
| 5   | 5 | 2 | 1 | 1 | 3 | 2 | 1 | 2 |
| 3   | 4 | 3 | 1 | 1 | 2 | 2 | 1 | 2 |
| 2   | 3 | 3 | 2 | 1 | 3 | 2 | 1 | 3 |
| 4   | 4 | 3 | 2 | 1 | 2 | 3 | 1 | 3 |
| 3   | 3 | 3 | 3 | 2 | 2 | 2 | 1 | 2 |
| 2   | 2 | 1 | 1 | 1 | 2 | 1 | 1 | 2 |
| 3   | 3 | 3 | 2 | 1 | 3 | 2 | 1 | 2 |
| 3   | 2 | 2 | 1 | 1 | 2 | 2 | 1 | 3 |
| 4   | 5 | 3 | 1 | 1 | 2 | 1 | 2 | 3 |
| 3   | 2 | 3 | 1 | 1 | 2 | 2 | 1 | 2 |
| 3   | 4 | 3 | 1 | 1 | 2 | 3 | 1 | 2 |
| 3   | 3 | 2 | 3 | 1 | 2 | 1 | 1 | 1 |
| 4   | 3 | 2 | 2 | 1 | 3 | 3 | 1 | 2 |
| 2   | 3 | 3 | 2 | 1 | 2 | 1 | 2 | 2 |
| 1   | 1 | 2 | 1 | 1 | 2 | 3 | 1 | 2 |
| 2   | 2 | 3 | 2 | 1 | 3 | 1 | 2 | 3 |
| 4   | 4 | 2 | 2 | 1 | 3 | 3 | 1 | 3 |
| 5   | 5 | 3 | 1 | 1 | 3 | 2 | 2 | 3 |
| 3   | 1 | 2 | 2 | 1 | 1 | 1 | 3 | 2 |
| 2   | 3 | 2 | 1 | 1 | 3 | 2 | 1 | 2 |
| 3   | 4 | 2 | 3 | 1 | 2 | 2 | 1 | 3 |
| 5   | 5 | 3 | 1 | 1 | 3 | 1 | 1 | 3 |
| 3   | 3 | 2 | 1 | 2 | 3 | 1 | 1 | 2 |
| 999 | 4 | 3 | 2 | 1 | 3 | 1 | 1 | 2 |
| 4   | 3 | 2 | 2 | 1 | 3 | 2 | 1 | 3 |
| 3   | 3 | 3 | 1 | 1 | 1 | 2 | 2 | 3 |
| 4   | 3 | 3 | 2 | 1 | 2 | 2 | 1 | 2 |
| 3   | 5 | 2 | 1 | 1 | 2 | 2 | 1 | 3 |
| 3   | 4 | 3 | 1 | 2 | 3 | 2 | 1 | 3 |
| 3   | 3 | 3 | 3 | 2 | 2 | 3 | 1 | 2 |
| 4   | 4 | 2 | 2 | 1 | 3 | 2 | 1 | 2 |
| 5   | 5 | 3 | 3 | 1 | 3 | 2 | 2 | 2 |
| 2   | 4 | 3 | 3 | 1 | 2 | 3 | 2 | 2 |
| 5   | 2 | 3 | 2 | 1 | 3 | 2 | 1 | 3 |
| 3   | 4 | 3 | 3 | 2 | 3 | 1 | 2 | 2 |

|   |   |   |   |   |   |   |   |   |
|---|---|---|---|---|---|---|---|---|
| 4 | 5 | 3 | 3 | 2 | 3 | 2 | 1 | 2 |
| 4 | 4 | 3 | 1 | 1 | 3 | 1 | 2 | 2 |
| 3 | 3 | 3 | 1 | 2 | 2 | 2 | 2 | 2 |
| 4 | 4 | 3 | 2 | 1 | 3 | 2 | 1 | 3 |
| 3 | 4 | 3 | 1 | 1 | 3 | 1 | 1 | 2 |
| 5 | 5 | 3 | 2 | 1 | 2 | 2 | 1 | 3 |
| 4 | 5 | 3 | 2 | 1 | 2 | 1 | 1 | 3 |
| 4 | 4 | 3 | 2 | 3 | 3 | 1 | 1 | 2 |
| 1 | 1 | 2 | 3 | 1 | 2 | 1 | 2 | 2 |
| 3 | 4 | 2 | 3 | 1 | 1 | 3 | 1 | 2 |
| 5 | 5 | 3 | 1 | 1 | 3 | 1 | 1 | 2 |
| 2 | 4 | 2 | 3 | 2 | 3 | 2 | 2 | 3 |
| 4 | 5 | 3 | 2 | 1 | 2 | 2 | 1 | 2 |
| 3 | 4 | 3 | 3 | 1 | 3 | 2 | 1 | 2 |
| 3 | 4 | 3 | 1 | 1 | 3 | 2 | 1 | 2 |
| 4 | 5 | 3 | 1 | 3 | 3 | 2 | 1 | 2 |

| SDQ8 | SDQ9 | SDQ10 | SDQ11 | SDQ12 | SDQ13 | SDQ14 | SDQ15 | SDQ16 |
|------|------|-------|-------|-------|-------|-------|-------|-------|
| 2    | 3    | 1     | 2     | 1     | 1     | 2     | 2     | 2     |
| 1    | 3    | 2     | 3     | 1     | 1     | 3     | 2     | 2     |
| 2    | 3    | 2     | 3     | 999   | 2     | 3     | 3     | 3     |
| 1    | 3    | 2     | 3     | 1     | 1     | 3     | 1     | 1     |
| 3    | 3    | 2     | 3     | 1     | 3     | 2     | 1     | 3     |
| 2    | 3    | 1     | 3     | 1     | 2     | 3     | 1     | 1     |
| 2    | 3    | 2     | 3     | 1     | 2     | 3     | 3     | 3     |
| 2    | 3    | 1     | 3     | 1     | 2     | 2     | 3     | 3     |
| 3    | 3    | 2     | 3     | 1     | 3     | 2     | 3     | 3     |
| 2    | 3    | 1     | 3     | 1     | 1     | 3     | 1     | 1     |
| 3    | 2    | 3     | 3     | 1     | 3     | 1     | 3     | 3     |
| 2    | 3    | 1     | 1     | 1     | 1     | 3     | 3     | 2     |
| 2    | 3    | 1     | 3     | 999   | 1     | 3     | 2     | 999   |
| 1    | 2    | 1     | 3     | 1     | 2     | 3     | 2     | 1     |
| 1    | 3    | 1     | 3     | 1     | 1     | 3     | 1     | 1     |
| 2    | 3    | 1     | 3     | 1     | 1     | 2     | 1     | 2     |
| 1    | 3    | 1     | 3     | 1     | 1     | 3     | 1     | 1     |
| 2    | 3    | 1     | 1     | 1     | 2     | 3     | 2     | 2     |
| 3    | 3    | 3     | 2     | 1     | 3     | 1     | 3     | 3     |
| 2    | 3    | 1     | 3     | 1     | 2     | 2     | 1     | 2     |
| 1    | 3    | 1     | 2     | 1     | 1     | 3     | 2     | 1     |
| 2    | 3    | 2     | 3     | 1     | 3     | 2     | 3     | 2     |
| 2    | 3    | 1     | 3     | 1     | 2     | 3     | 2     | 1     |
| 2    | 3    | 2     | 3     | 1     | 3     | 2     | 3     | 2     |
| 1    | 3    | 3     | 3     | 1     | 2     | 2     | 2     | 2     |
| 2    | 3    | 1     | 3     | 1     | 2     | 3     | 1     | 1     |
| 2    | 3    | 2     | 3     | 1     | 2     | 2     | 3     | 3     |
| 3    | 3    | 999   | 3     | 999   | 2     | 3     | 3     | 3     |
| 3    | 3    | 3     | 3     | 2     | 2     | 2     | 3     | 3     |
| 2    | 2    | 3     | 3     | 2     | 2     | 3     | 2     | 2     |
| 1    | 3    | 1     | 3     | 1     | 3     | 3     | 3     | 1     |
| 2    | 999  | 1     | 999   | 999   | 999   | 2     | 3     | 999   |
| 2    | 2    | 2     | 3     | 1     | 2     | 3     | 3     | 2     |
| 1    | 3    | 3     | 3     | 1     | 2     | 3     | 3     | 1     |
| 2    | 3    | 2     | 3     | 1     | 2     | 3     | 1     | 2     |
| 3    | 2    | 3     | 3     | 1     | 3     | 2     | 3     | 3     |
| 2    | 1    | 1     | 3     | 1     | 2     | 3     | 2     | 3     |
| 3    | 3    | 1     | 3     | 1     | 2     | 3     | 3     | 1     |
| 3    | 2    | 1     | 3     | 2     | 2     | 2     | 2     | 2     |
| 2    | 2    | 2     | 3     | 1     | 2     | 2     | 2     | 1     |
| 1    | 3    | 2     | 3     | 1     | 1     | 3     | 1     | 2     |
| 3    | 3    | 2     | 3     | 1     | 1     | 3     | 2     | 2     |
| 2    | 3    | 2     | 3     | 1     | 1     | 3     | 2     | 1     |
| 2    | 3    | 1     | 3     | 1     | 1     | 3     | 2     | 1     |
| 1    | 2    | 2     | 2     | 1     | 1     | 2     | 2     | 1     |
| 2    | 3    | 2     | 3     | 1     | 3     | 2     | 2     | 2     |
| 2    | 1    | 1     | 3     | 1     | 1     | 3     | 1     | 1     |
| 2    | 3    | 2     | 2     | 1     | 2     | 2     | 3     | 3     |
| 1    | 3    | 2     | 3     | 1     | 1     | 3     | 1     | 1     |

|   |   |   |   |   |   |   |   |     |
|---|---|---|---|---|---|---|---|-----|
| 2 | 3 | 2 | 3 | 1 | 2 | 3 | 2 | 1   |
| 1 | 3 | 2 | 3 | 1 | 1 | 3 | 3 | 2   |
| 1 | 3 | 1 | 3 | 1 | 1 | 2 | 2 | 1   |
| 2 | 3 | 2 | 3 | 1 | 2 | 3 | 3 | 3   |
| 2 | 2 | 2 | 3 | 1 | 2 | 3 | 2 | 3   |
| 2 | 3 | 2 | 3 | 1 | 1 | 3 | 2 | 3   |
| 3 | 3 | 3 | 2 | 1 | 3 | 3 | 2 | 3   |
| 2 | 3 | 3 | 2 | 1 | 1 | 2 | 2 | 1   |
| 2 | 3 | 2 | 3 | 1 | 1 | 3 | 3 | 2   |
| 2 | 2 | 1 | 3 | 1 | 2 | 3 | 2 | 2   |
| 2 | 3 | 1 | 3 | 1 | 2 | 3 | 2 | 2   |
| 2 | 3 | 2 | 3 | 1 | 2 | 3 | 2 | 3   |
| 2 | 3 | 2 | 1 | 1 | 2 | 2 | 3 | 3   |
| 2 | 3 | 1 | 3 | 1 | 2 | 2 | 2 | 2   |
| 2 | 3 | 3 | 3 | 1 | 1 | 2 | 3 | 2   |
| 2 | 3 | 1 | 3 | 1 | 2 | 3 | 2 | 1   |
| 1 | 3 | 1 | 3 | 1 | 1 | 3 | 1 | 1   |
| 2 | 2 | 1 | 3 | 1 | 2 | 2 | 1 | 1   |
| 2 | 3 | 2 | 3 | 1 | 1 | 3 | 2 | 1   |
| 2 | 3 | 1 | 3 | 1 | 1 | 3 | 1 | 2   |
| 2 | 3 | 2 | 3 | 1 | 2 | 3 | 1 | 999 |
| 2 | 3 | 1 | 3 | 1 | 1 | 3 | 1 | 2   |
| 1 | 3 | 2 | 3 | 1 | 2 | 3 | 1 | 2   |
| 2 | 3 | 3 | 3 | 1 | 2 | 2 | 3 | 3   |
| 1 | 3 | 2 | 3 | 1 | 1 | 3 | 2 | 1   |
| 2 | 3 | 1 | 3 | 1 | 1 | 3 | 1 | 1   |
| 2 | 3 | 3 | 3 | 1 | 2 | 3 | 2 | 1   |
| 2 | 3 | 2 | 3 | 1 | 2 | 2 | 3 | 2   |
| 3 | 3 | 3 | 3 | 1 | 1 | 3 | 2 | 2   |
| 2 | 3 | 1 | 3 | 1 | 1 | 3 | 3 | 2   |
| 2 | 2 | 2 | 3 | 1 | 3 | 2 | 2 | 2   |
| 1 | 2 | 3 | 3 | 1 | 2 | 3 | 3 | 3   |
| 1 | 3 | 3 | 3 | 1 | 1 | 3 | 3 | 1   |
| 3 | 3 | 1 | 3 | 1 | 3 | 3 | 2 | 1   |
| 3 | 3 | 3 | 2 | 1 | 3 | 2 | 2 | 1   |
| 3 | 3 | 3 | 3 | 3 | 2 | 2 | 3 | 2   |
| 1 | 3 | 3 | 3 | 1 | 2 | 2 | 3 | 2   |
| 1 | 3 | 1 | 3 | 1 | 1 | 2 | 2 | 2   |
| 2 | 3 | 3 | 3 | 1 | 1 | 3 | 2 | 1   |
| 1 | 3 | 2 | 2 | 1 | 1 | 2 | 1 | 1   |
| 2 | 2 | 1 | 3 | 1 | 2 | 3 | 3 | 3   |
| 2 | 2 | 2 | 2 | 1 | 1 | 2 | 2 | 2   |
| 1 | 3 | 3 | 3 | 1 | 1 | 2 | 3 | 1   |
| 3 | 3 | 3 | 3 | 1 | 1 | 2 | 2 | 999 |
| 1 | 2 | 2 | 3 | 1 | 1 | 1 | 3 | 2   |
| 1 | 2 | 3 | 3 | 1 | 1 | 2 | 2 | 2   |
| 1 | 2 | 2 | 3 | 1 | 2 | 3 | 2 | 2   |
| 2 | 3 | 1 | 3 | 1 | 1 | 3 | 1 | 1   |
| 1 | 3 | 1 | 3 | 1 | 1 | 3 | 1 | 1   |
| 1 | 3 | 1 | 3 | 1 | 1 | 3 | 1 | 2   |

|   |     |   |     |   |   |   |   |   |
|---|-----|---|-----|---|---|---|---|---|
| 2 | 2   | 3 | 3   | 2 | 2 | 2 | 3 | 2 |
| 2 | 3   | 1 | 2   | 1 | 1 | 2 | 2 | 1 |
| 1 | 3   | 2 | 3   | 1 | 1 | 3 | 1 | 1 |
| 1 | 2   | 1 | 2   | 1 | 3 | 2 | 2 | 3 |
| 3 | 3   | 3 | 3   | 1 | 3 | 3 | 1 | 1 |
| 1 | 1   | 1 | 3   | 1 | 1 | 3 | 1 | 1 |
| 1 | 3   | 2 | 3   | 1 | 2 | 3 | 2 | 2 |
| 3 | 3   | 3 | 3   | 1 | 3 | 3 | 3 | 3 |
| 2 | 3   | 1 | 3   | 1 | 1 | 3 | 3 | 2 |
| 1 | 3   | 1 | 3   | 1 | 1 | 3 | 1 | 1 |
| 3 | 2   | 2 | 2   | 1 | 2 | 3 | 2 | 2 |
| 2 | 3   | 2 | 3   | 1 | 1 | 3 | 2 | 2 |
| 2 | 2   | 3 | 3   | 1 | 2 | 2 | 3 | 2 |
| 1 | 3   | 1 | 3   | 1 | 1 | 2 | 2 | 1 |
| 1 | 3   | 2 | 3   | 2 | 1 | 3 | 2 | 1 |
| 2 | 3   | 1 | 3   | 1 | 2 | 2 | 2 | 2 |
| 1 | 2   | 1 | 3   | 1 | 2 | 3 | 2 | 2 |
| 1 | 3   | 3 | 3   | 1 | 2 | 2 | 2 | 1 |
| 3 | 3   | 2 | 3   | 1 | 2 | 3 | 1 | 3 |
| 2 | 3   | 1 | 2   | 1 | 2 | 2 | 3 | 1 |
| 2 | 3   | 1 | 3   | 1 | 1 | 3 | 2 | 1 |
| 1 | 3   | 1 | 999 | 1 | 1 | 2 | 2 | 1 |
| 1 | 3   | 1 | 3   | 2 | 1 | 3 | 2 | 1 |
| 2 | 2   | 2 | 2   | 1 | 1 | 2 | 2 | 2 |
| 3 | 3   | 1 | 3   | 1 | 1 | 3 | 3 | 3 |
| 3 | 2   | 3 | 3   | 1 | 1 | 3 | 3 | 2 |
| 2 | 3   | 3 | 2   | 1 | 2 | 3 | 3 | 3 |
| 1 | 3   | 2 | 1   | 1 | 1 | 2 | 2 | 3 |
| 1 | 3   | 1 | 3   | 1 | 1 | 2 | 2 | 1 |
| 2 | 3   | 3 | 3   | 2 | 3 | 2 | 3 | 3 |
| 2 | 3   | 2 | 3   | 1 | 2 | 3 | 3 | 1 |
| 1 | 3   | 2 | 3   | 1 | 1 | 3 | 3 | 1 |
| 2 | 3   | 1 | 3   | 1 | 2 | 3 | 3 | 3 |
| 3 | 2   | 3 | 3   | 1 | 3 | 3 | 3 | 3 |
| 2 | 3   | 3 | 3   | 2 | 2 | 2 | 2 | 3 |
| 2 | 3   | 3 | 3   | 1 | 2 | 3 | 2 | 2 |
| 2 | 3   | 2 | 3   | 1 | 1 | 3 | 3 | 2 |
| 3 | 3   | 2 | 3   | 1 | 3 | 1 | 2 | 2 |
| 3 | 3   | 2 | 3   | 1 | 1 | 3 | 1 | 2 |
| 1 | 2   | 1 | 3   | 1 | 1 | 2 | 3 | 2 |
| 1 | 3   | 2 | 3   | 1 | 1 | 3 | 3 | 2 |
| 2 | 3   | 2 | 3   | 2 | 1 | 3 | 2 | 3 |
| 2 | 3   | 3 | 3   | 1 | 2 | 3 | 3 | 2 |
| 3 | 2   | 1 | 3   | 1 | 2 | 2 | 1 | 3 |
| 1 | 2   | 1 | 3   | 1 | 2 | 3 | 3 | 1 |
| 1 | 3   | 1 | 3   | 1 | 1 | 2 | 1 | 1 |
| 3 | 3   | 3 | 999 | 2 | 3 | 3 | 3 | 3 |
| 1 | 3   | 2 | 3   | 1 | 1 | 3 | 3 | 3 |
| 2 | 3   | 2 | 2   | 1 | 2 | 2 | 3 | 2 |
| 2 | 999 | 3 | 3   | 1 | 3 | 3 | 2 | 2 |

|   |   |   |   |   |   |   |   |     |
|---|---|---|---|---|---|---|---|-----|
| 3 | 2 | 3 | 3 | 1 | 1 | 3 | 3 | 3   |
| 2 | 3 | 1 | 2 | 1 | 1 | 3 | 2 | 2   |
| 1 | 3 | 1 | 3 | 1 | 1 | 2 | 2 | 2   |
| 2 | 3 | 2 | 3 | 1 | 2 | 2 | 1 | 2   |
| 2 | 3 | 3 | 3 | 1 | 2 | 2 | 3 | 999 |
| 1 | 3 | 2 | 3 | 1 | 1 | 3 | 1 | 1   |
| 2 | 3 | 1 | 3 | 1 | 3 | 2 | 2 | 2   |
| 1 | 3 | 1 | 3 | 1 | 1 | 2 | 2 | 2   |
| 2 | 3 | 3 | 3 | 1 | 1 | 3 | 1 | 2   |
| 1 | 3 | 2 | 3 | 1 | 2 | 3 | 3 | 2   |
| 1 | 3 | 2 | 3 | 1 | 2 | 3 | 3 | 2   |
| 2 | 3 | 1 | 3 | 1 | 1 | 3 | 3 | 2   |
| 3 | 3 | 2 | 3 | 1 | 3 | 2 | 3 | 2   |
| 2 | 3 | 1 | 3 | 1 | 2 | 2 | 3 | 2   |
| 1 | 3 | 1 | 3 | 1 | 1 | 2 | 2 | 1   |
| 3 | 3 | 3 | 3 | 1 | 1 | 2 | 3 | 3   |
| 2 | 2 | 2 | 3 | 1 | 3 | 2 | 3 | 2   |
| 2 | 3 | 1 | 3 | 1 | 1 | 3 | 1 | 1   |
| 1 | 3 | 2 | 3 | 1 | 2 | 2 | 1 | 2   |
| 3 | 3 | 1 | 3 | 1 | 1 | 1 | 3 | 3   |
| 3 | 3 | 3 | 3 | 1 | 2 | 3 | 3 | 3   |
| 3 | 3 | 1 | 3 | 1 | 1 | 3 | 3 | 3   |
| 1 | 3 | 1 | 3 | 1 | 1 | 3 | 2 | 1   |
| 2 | 3 | 3 | 3 | 1 | 2 | 3 | 2 | 1   |
| 2 | 3 | 3 | 3 | 1 | 1 | 3 | 3 | 2   |
| 1 | 3 | 2 | 3 | 1 | 1 | 3 | 2 | 2   |
| 2 | 3 | 1 | 3 | 1 | 1 | 2 | 1 | 2   |
| 1 | 3 | 2 | 3 | 1 | 1 | 3 | 1 | 2   |
| 2 | 3 | 2 | 3 | 1 | 2 | 3 | 2 | 3   |
| 2 | 3 | 2 | 3 | 1 | 1 | 3 | 2 | 2   |
| 2 | 3 | 2 | 3 | 1 | 2 | 3 | 3 | 1   |
| 3 | 3 | 1 | 2 | 1 | 2 | 2 | 3 | 2   |
| 3 | 3 | 2 | 3 | 1 | 1 | 3 | 2 | 2   |
| 1 | 2 | 1 | 3 | 1 | 3 | 1 | 2 | 3   |
| 3 | 2 | 2 | 3 | 1 | 2 | 2 | 2 | 2   |
| 2 | 2 | 2 | 3 | 1 | 2 | 3 | 2 | 2   |
| 3 | 2 | 1 | 3 | 1 | 2 | 2 | 3 | 2   |
| 1 | 3 | 3 | 3 | 1 | 1 | 2 | 2 | 3   |
| 1 | 3 | 1 | 3 | 1 | 1 | 3 | 2 | 1   |
| 2 | 3 | 1 | 2 | 1 | 1 | 3 | 2 | 1   |
| 3 | 2 | 2 | 3 | 1 | 3 | 2 | 2 | 3   |
| 1 | 3 | 1 | 3 | 1 | 1 | 2 | 2 | 3   |
| 2 | 3 | 2 | 3 | 1 | 1 | 3 | 1 | 1   |
| 1 | 3 | 2 | 3 | 1 | 2 | 3 | 3 | 3   |
| 1 | 2 | 3 | 3 | 1 | 2 | 2 | 2 | 1   |
| 1 | 3 | 1 | 3 | 1 | 2 | 2 | 2 | 1   |
| 1 | 3 | 3 | 3 | 1 | 1 | 3 | 3 | 2   |
| 2 | 3 | 1 | 3 | 1 | 1 | 3 | 3 | 2   |
| 2 | 3 | 2 | 3 | 1 | 1 | 3 | 3 | 1   |
| 1 | 3 | 2 | 3 | 1 | 1 | 3 | 1 | 2   |





|     |   |   |   |     |   |   |   |   |
|-----|---|---|---|-----|---|---|---|---|
| 3   | 3 | 2 | 3 | 1   | 3 | 2 | 1 | 2 |
| 3   | 3 | 2 | 3 | 1   | 3 | 3 | 3 | 3 |
| 2   | 3 | 1 | 3 | 1   | 2 | 2 | 3 | 2 |
| 3   | 2 | 3 | 3 | 1   | 2 | 2 | 2 | 3 |
| 3   | 3 | 3 | 3 | 2   | 2 | 2 | 1 | 3 |
| 2   | 3 | 2 | 3 | 1   | 2 | 2 | 3 | 2 |
| 2   | 3 | 3 | 3 | 1   | 3 | 2 | 2 | 3 |
| 2   | 3 | 2 | 3 | 2   | 2 | 3 | 1 | 1 |
| 2   | 3 | 2 | 3 | 1   | 2 | 3 | 2 | 2 |
| 3   | 3 | 3 | 2 | 1   | 3 | 2 | 2 | 3 |
| 2   | 2 | 1 | 3 | 1   | 1 | 2 | 2 | 2 |
| 2   | 2 | 2 | 3 | 1   | 2 | 2 | 2 | 2 |
| 3   | 2 | 1 | 3 | 2   | 1 | 3 | 2 | 3 |
| 3   | 3 | 1 | 3 | 2   | 2 | 2 | 2 | 3 |
| 3   | 3 | 3 | 3 | 1   | 2 | 2 | 1 | 3 |
| 3   | 2 | 1 | 3 | 1   | 2 | 3 | 1 | 2 |
| 2   | 3 | 1 | 3 | 1   | 1 | 2 | 2 | 2 |
| 999 | 2 | 1 | 3 | 1   | 2 | 2 | 2 | 2 |
| 2   | 3 | 1 | 1 | 1   | 3 | 1 | 2 | 2 |
| 2   | 3 | 1 | 3 | 1   | 2 | 3 | 2 | 3 |
| 2   | 3 | 2 | 3 | 1   | 1 | 2 | 3 | 3 |
| 2   | 3 | 1 | 3 | 1   | 2 | 2 | 1 | 3 |
| 3   | 2 | 1 | 2 | 1   | 3 | 2 | 2 | 2 |
| 2   | 3 | 2 | 3 | 1   | 1 | 3 | 3 | 1 |
| 3   | 3 | 2 | 3 | 1   | 1 | 3 | 3 | 3 |
| 2   | 3 | 3 | 3 | 1   | 2 | 2 | 3 | 2 |
| 2   | 3 | 2 | 3 | 1   | 1 | 2 | 2 | 3 |
| 2   | 2 | 1 | 2 | 1   | 2 | 2 | 2 | 2 |
| 2   | 3 | 1 | 3 | 1   | 2 | 3 | 2 | 3 |
| 3   | 3 | 1 | 3 | 1   | 3 | 2 | 2 | 3 |
| 2   | 2 | 1 | 3 | 1   | 1 | 2 | 2 | 2 |
| 2   | 3 | 2 | 3 | 1   | 2 | 2 | 3 | 3 |
| 3   | 2 | 2 | 3 | 1   | 2 | 3 | 2 | 3 |
| 2   | 3 | 1 | 3 | 1   | 2 | 3 | 2 | 2 |
| 2   | 3 | 1 | 3 | 1   | 2 | 2 | 3 | 3 |
| 3   | 3 | 2 | 3 | 1   | 2 | 2 | 3 | 3 |
| 2   | 3 | 3 | 3 | 1   | 2 | 3 | 3 | 2 |
| 2   | 3 | 3 | 3 | 1   | 1 | 3 | 2 | 1 |
| 1   | 2 | 2 | 3 | 1   | 1 | 3 | 2 | 2 |
| 3   | 3 | 3 | 3 | 1   | 2 | 3 | 2 | 2 |
| 2   | 3 | 2 | 3 | 1   | 1 | 3 | 2 | 2 |
| 2   | 3 | 1 | 3 | 1   | 1 | 2 | 2 | 2 |
| 3   | 3 | 1 | 3 | 1   | 2 | 3 | 2 | 1 |
| 1   | 3 | 2 | 3 | 999 | 1 | 3 | 1 | 2 |
| 1   | 3 | 1 | 3 | 1   | 2 | 3 | 1 | 1 |
| 1   | 3 | 1 | 3 | 1   | 1 | 2 | 3 | 1 |
| 999 | 2 | 1 | 3 | 1   | 2 | 3 | 1 | 2 |
| 2   | 3 | 2 | 3 | 1   | 1 | 3 | 1 | 2 |
| 3   | 3 | 2 | 3 | 1   | 2 | 3 | 3 | 3 |
| 1   | 2 | 3 | 3 | 1   | 1 | 3 | 2 | 2 |

|   |   |   |   |   |   |   |   |   |
|---|---|---|---|---|---|---|---|---|
| 1 | 3 | 2 | 3 | 1 | 1 | 3 | 2 | 2 |
| 1 | 3 | 1 | 3 | 1 | 1 | 3 | 3 | 3 |
| 3 | 3 | 1 | 2 | 1 | 2 | 1 | 3 | 3 |
| 3 | 2 | 1 | 2 | 1 | 3 | 2 | 3 | 2 |
| 3 | 3 | 2 | 3 | 1 | 2 | 3 | 3 | 2 |
| 2 | 3 | 1 | 3 | 1 | 1 | 3 | 2 | 2 |
| 2 | 3 | 1 | 3 | 1 | 3 | 2 | 2 | 2 |
| 3 | 3 | 3 | 3 | 1 | 2 | 2 | 2 | 3 |
| 2 | 3 | 2 | 3 | 1 | 1 | 2 | 3 | 2 |
| 2 | 3 | 2 | 3 | 2 | 2 | 2 | 3 | 1 |
| 1 | 3 | 2 | 3 | 1 | 2 | 2 | 2 | 1 |
| 2 | 3 | 1 | 3 | 1 | 3 | 3 | 2 | 2 |
| 2 | 3 | 1 | 3 | 1 | 1 | 3 | 3 | 2 |
| 1 | 3 | 1 | 3 | 1 | 1 | 3 | 1 | 2 |
| 2 | 3 | 2 | 3 | 1 | 1 | 3 | 2 | 3 |
| 1 | 3 | 2 | 3 | 1 | 1 | 3 | 1 | 2 |
| 2 | 3 | 1 | 3 | 1 | 2 | 3 | 2 | 1 |
| 1 | 3 | 1 | 3 | 1 | 1 | 3 | 2 | 2 |
| 2 | 3 | 3 | 3 | 1 | 2 | 3 | 2 | 1 |
| 1 | 3 | 3 | 3 | 1 | 1 | 3 | 2 | 2 |
| 2 | 2 | 3 | 3 | 1 | 2 | 3 | 2 | 1 |
| 1 | 3 | 2 | 3 | 1 | 2 | 3 | 2 | 1 |
| 2 | 2 | 2 | 3 | 1 | 1 | 2 | 2 | 1 |
| 2 | 3 | 1 | 3 | 1 | 2 | 2 | 2 | 3 |
| 1 | 3 | 3 | 3 | 1 | 1 | 2 | 3 | 2 |
| 1 | 3 | 2 | 3 | 1 | 1 | 3 | 2 | 2 |
| 3 | 3 | 2 | 3 | 1 | 3 | 3 | 3 | 2 |
| 2 | 2 | 2 | 3 | 1 | 2 | 3 | 2 | 2 |
| 2 | 3 | 2 | 3 | 2 | 2 | 3 | 1 | 3 |
| 1 | 2 | 2 | 2 | 1 | 2 | 2 | 2 | 3 |
| 2 | 2 | 3 | 3 | 2 | 1 | 2 | 3 | 3 |
| 3 | 2 | 1 | 3 | 1 | 2 | 2 | 2 | 3 |
| 3 | 3 | 2 | 3 | 1 | 2 | 3 | 2 | 1 |
| 1 | 2 | 2 | 3 | 1 | 2 | 2 | 3 | 2 |
| 3 | 3 | 1 | 3 | 1 | 1 | 3 | 2 | 2 |
| 3 | 3 | 2 | 3 | 1 | 1 | 3 | 2 | 1 |
| 2 | 2 | 2 | 3 | 1 | 1 | 3 | 1 | 2 |
| 1 | 3 | 2 | 3 | 1 | 1 | 3 | 2 | 1 |
| 1 | 2 | 2 | 3 | 1 | 1 | 3 | 3 | 1 |
| 1 | 3 | 1 | 3 | 1 | 1 | 3 | 2 | 1 |
| 2 | 3 | 2 | 2 | 1 | 1 | 3 | 1 | 2 |
| 1 | 3 | 2 | 3 | 1 | 1 | 2 | 1 | 1 |
| 1 | 3 | 3 | 3 | 1 | 1 | 3 | 1 | 2 |
| 2 | 3 | 2 | 3 | 1 | 2 | 3 | 3 | 2 |
| 2 | 3 | 2 | 3 | 1 | 1 | 3 | 2 | 1 |
| 1 | 2 | 2 | 3 | 1 | 1 | 3 | 2 | 2 |
| 1 | 3 | 1 | 3 | 1 | 1 | 3 | 1 | 1 |
| 2 | 3 | 1 | 3 | 1 | 2 | 3 | 2 | 1 |
| 2 | 3 | 3 | 3 | 1 | 2 | 3 | 3 | 1 |
| 1 | 3 | 2 | 3 | 1 | 1 | 3 | 2 | 1 |

|   |     |   |   |   |   |   |   |   |
|---|-----|---|---|---|---|---|---|---|
| 1 | 3   | 1 | 2 | 1 | 3 | 3 | 3 | 1 |
| 2 | 2   | 2 | 3 | 1 | 2 | 2 | 1 | 2 |
| 2 | 3   | 1 | 3 | 1 | 1 | 3 | 1 | 1 |
| 1 | 999 | 1 | 3 | 1 | 1 | 2 | 2 | 3 |
| 2 | 2   | 1 | 3 | 1 | 1 | 2 | 1 | 3 |
| 2 | 3   | 2 | 3 | 1 | 1 | 2 | 2 | 2 |
| 2 | 3   | 3 | 3 | 1 | 1 | 3 | 3 | 2 |
| 2 | 3   | 2 | 3 | 1 | 1 | 3 | 3 | 2 |
| 2 | 3   | 3 | 3 | 1 | 1 | 3 | 2 | 1 |
| 1 | 3   | 2 | 3 | 1 | 1 | 3 | 1 | 2 |
| 1 | 3   | 2 | 3 | 1 | 1 | 3 | 2 | 1 |
| 2 | 3   | 2 | 3 | 1 | 1 | 2 | 1 | 2 |
| 1 | 3   | 2 | 3 | 1 | 1 | 3 | 2 | 2 |
| 2 | 3   | 2 | 3 | 1 | 2 | 2 | 1 | 1 |
| 2 | 3   | 2 | 3 | 1 | 2 | 3 | 1 | 1 |
| 2 | 3   | 1 | 3 | 1 | 2 | 3 | 1 | 2 |
| 3 | 2   | 1 | 3 | 1 | 1 | 2 | 1 | 2 |
| 2 | 3   | 2 | 3 | 1 | 1 | 3 | 2 | 1 |
| 1 | 3   | 1 | 3 | 1 | 1 | 3 | 2 | 2 |
| 2 | 2   | 3 | 3 | 2 | 3 | 2 | 3 | 3 |
| 1 | 3   | 2 | 3 | 1 | 1 | 3 | 3 | 2 |
| 3 | 2   | 2 | 3 | 1 | 2 | 2 | 3 | 2 |
| 2 | 2   | 2 | 3 | 1 | 1 | 3 | 2 | 1 |
| 3 | 3   | 1 | 3 | 1 | 1 | 3 | 2 | 1 |
| 2 | 2   | 2 | 3 | 1 | 2 | 3 | 2 | 2 |
| 2 | 3   | 1 | 3 | 1 | 1 | 3 | 1 | 3 |
| 1 | 3   | 3 | 3 | 2 | 1 | 3 | 3 | 1 |
| 1 | 2   | 2 | 3 | 1 | 2 | 2 | 2 | 2 |
| 2 | 3   | 2 | 3 | 1 | 2 | 3 | 2 | 3 |
| 1 | 3   | 3 | 3 | 1 | 1 | 2 | 2 | 1 |
| 1 | 3   | 2 | 3 | 2 | 1 | 2 | 3 | 2 |
| 3 | 3   | 2 | 1 | 1 | 3 | 2 | 2 | 3 |
| 2 | 3   | 2 | 3 | 1 | 2 | 2 | 2 | 2 |
| 2 | 3   | 2 | 3 | 1 | 2 | 3 | 1 | 3 |
| 2 | 2   | 3 | 3 | 1 | 2 | 3 | 3 | 2 |
| 3 | 3   | 2 | 3 | 1 | 3 | 2 | 2 | 3 |
| 2 | 2   | 2 | 3 | 1 | 3 | 2 | 2 | 2 |
| 2 | 2   | 2 | 3 | 1 | 3 | 3 | 2 | 3 |
| 3 | 3   | 1 | 3 | 1 | 2 | 2 | 1 | 2 |
| 3 | 3   | 2 | 3 | 1 | 3 | 2 | 2 | 3 |
| 2 | 3   | 3 | 3 | 1 | 2 | 3 | 2 | 1 |
| 3 | 3   | 2 | 3 | 1 | 2 | 3 | 2 | 2 |
| 2 | 3   | 3 | 3 | 1 | 3 | 2 | 2 | 3 |
| 2 | 3   | 2 | 3 | 1 | 1 | 2 | 3 | 3 |
| 3 | 2   | 1 | 3 | 1 | 2 | 2 | 1 | 3 |
| 3 | 3   | 3 | 3 | 1 | 3 | 2 | 3 | 3 |
| 3 | 3   | 1 | 3 | 1 | 2 | 2 | 2 | 3 |
| 2 | 2   | 2 | 3 | 1 | 1 | 2 | 1 | 1 |
| 2 | 3   | 1 | 3 | 1 | 2 | 3 | 2 | 2 |
| 2 | 3   | 2 | 2 | 1 | 2 | 3 | 3 | 3 |

|   |   |   |     |   |   |   |   |   |
|---|---|---|-----|---|---|---|---|---|
| 2 | 3 | 2 | 3   | 1 | 2 | 2 | 3 | 2 |
| 1 | 3 | 2 | 3   | 1 | 2 | 3 | 3 | 2 |
| 2 | 2 | 1 | 3   | 1 | 3 | 1 | 3 | 3 |
| 2 | 3 | 2 | 3   | 1 | 2 | 3 | 2 | 2 |
| 2 | 3 | 3 | 3   | 1 | 1 | 3 | 3 | 2 |
| 3 | 3 | 2 | 3   | 1 | 2 | 2 | 2 | 2 |
| 1 | 3 | 2 | 3   | 1 | 1 | 3 | 2 | 3 |
| 2 | 3 | 2 | 3   | 1 | 3 | 2 | 2 | 2 |
| 3 | 2 | 2 | 3   | 1 | 2 | 2 | 2 | 2 |
| 2 | 3 | 2 | 3   | 1 | 2 | 2 | 1 | 3 |
| 2 | 3 | 1 | 3   | 1 | 2 | 2 | 3 | 2 |
| 2 | 3 | 1 | 2   | 1 | 1 | 2 | 3 | 3 |
| 3 | 3 | 1 | 3   | 1 | 2 | 2 | 1 | 3 |
| 2 | 3 | 2 | 3   | 1 | 2 | 2 | 3 | 2 |
| 2 | 3 | 3 | 3   | 1 | 2 | 3 | 3 | 2 |
| 2 | 3 | 1 | 3   | 1 | 2 | 3 | 2 | 1 |
| 2 | 3 | 1 | 3   | 1 | 2 | 2 | 1 | 3 |
| 3 | 3 | 2 | 2   | 1 | 3 | 2 | 2 | 3 |
| 3 | 3 | 3 | 3   | 1 | 2 | 3 | 3 | 2 |
| 3 | 3 | 2 | 1   | 2 | 3 | 2 | 1 | 2 |
| 1 | 2 | 3 | 3   | 2 | 2 | 3 | 3 | 1 |
| 1 | 3 | 2 | 3   | 1 | 1 | 3 | 2 | 1 |
| 3 | 2 | 2 | 3   | 1 | 2 | 3 | 2 | 2 |
| 1 | 2 | 2 | 3   | 1 | 1 | 2 | 2 | 2 |
| 1 | 3 | 1 | 3   | 1 | 1 | 3 | 2 | 2 |
| 2 | 3 | 1 | 3   | 1 | 2 | 2 | 1 | 2 |
| 2 | 2 | 3 | 3   | 1 | 2 | 2 | 3 | 2 |
| 2 | 2 | 2 | 3   | 1 | 1 | 2 | 2 | 2 |
| 2 | 3 | 1 | 3   | 1 | 1 | 3 | 1 | 1 |
| 2 | 3 | 2 | 3   | 1 | 2 | 3 | 2 | 2 |
| 2 | 3 | 1 | 3   | 1 | 1 | 2 | 1 | 1 |
| 2 | 3 | 3 | 999 | 1 | 3 | 3 | 3 | 3 |
| 1 | 2 | 1 | 3   | 1 | 1 | 3 | 1 | 2 |
| 1 | 3 | 2 | 3   | 1 | 2 | 3 | 2 | 2 |
| 2 | 3 | 2 | 3   | 1 | 1 | 3 | 2 | 1 |
| 2 | 3 | 1 | 3   | 1 | 2 | 3 | 1 | 1 |
| 3 | 3 | 1 | 3   | 1 | 3 | 3 | 1 | 3 |
| 2 | 3 | 2 | 3   | 1 | 1 | 2 | 3 | 2 |
| 2 | 2 | 1 | 3   | 1 | 2 | 2 | 2 | 3 |
| 2 | 3 | 2 | 3   | 1 | 1 | 2 | 2 | 3 |
| 1 | 3 | 3 | 3   | 1 | 3 | 3 | 1 | 1 |
| 2 | 3 | 2 | 3   | 1 | 1 | 3 | 1 | 1 |
| 2 | 2 | 1 | 3   | 2 | 2 | 2 | 3 | 3 |
| 1 | 3 | 2 | 3   | 1 | 1 | 3 | 2 | 2 |
| 2 | 3 | 3 | 3   | 1 | 1 | 2 | 3 | 2 |
| 2 | 3 | 2 | 3   | 1 | 2 | 3 | 3 | 3 |
| 3 | 3 | 3 | 3   | 1 | 2 | 3 | 3 | 3 |
| 2 | 2 | 3 | 3   | 1 | 2 | 3 | 2 | 1 |
| 1 | 2 | 1 | 3   | 1 | 1 | 3 | 2 | 2 |
| 2 | 3 | 2 | 3   | 1 | 1 | 3 | 2 | 1 |

|   |   |   |   |     |   |     |   |     |
|---|---|---|---|-----|---|-----|---|-----|
| 2 | 3 | 1 | 3 | 1   | 2 | 3   | 2 | 2   |
| 2 | 2 | 1 | 3 | 1   | 2 | 2   | 2 | 2   |
| 2 | 3 | 1 | 3 | 1   | 2 | 3   | 2 | 1   |
| 2 | 3 | 1 | 3 | 1   | 1 | 3   | 1 | 2   |
| 3 | 3 | 2 | 2 | 1   | 1 | 3   | 2 | 999 |
| 1 | 3 | 2 | 3 | 1   | 1 | 3   | 2 | 1   |
| 2 | 3 | 1 | 3 | 1   | 1 | 2   | 2 | 1   |
| 2 | 2 | 1 | 3 | 1   | 2 | 2   | 2 | 2   |
| 2 | 3 | 2 | 3 | 1   | 2 | 2   | 2 | 1   |
| 3 | 3 | 3 | 2 | 1   | 3 | 2   | 2 | 2   |
| 2 | 3 | 2 | 3 | 1   | 1 | 3   | 3 | 1   |
| 2 | 2 | 1 | 3 | 1   | 3 | 2   | 3 | 1   |
| 3 | 3 | 3 | 2 | 1   | 3 | 2   | 3 | 3   |
| 1 | 3 | 3 | 3 | 1   | 1 | 3   | 1 | 1   |
| 2 | 3 | 2 | 3 | 1   | 2 | 2   | 1 | 2   |
| 2 | 3 | 3 | 3 | 2   | 1 | 2   | 3 | 1   |
| 1 | 3 | 2 | 3 | 1   | 1 | 3   | 3 | 2   |
| 2 | 3 | 2 | 3 | 1   | 1 | 3   | 2 | 3   |
| 3 | 3 | 1 | 3 | 1   | 2 | 2   | 2 | 3   |
| 3 | 3 | 1 | 3 | 1   | 1 | 2   | 3 | 3   |
| 3 | 3 | 3 | 3 | 1   | 2 | 3   | 3 | 2   |
| 1 | 3 | 3 | 3 | 1   | 1 | 3   | 2 | 1   |
| 2 | 3 | 2 | 3 | 1   | 1 | 3   | 2 | 3   |
| 1 | 3 | 3 | 3 | 1   | 2 | 3   | 3 | 2   |
| 2 | 2 | 2 | 2 | 1   | 2 | 2   | 2 | 2   |
| 1 | 3 | 2 | 3 | 1   | 1 | 3   | 2 | 1   |
| 2 | 3 | 1 | 3 | 1   | 1 | 3   | 3 | 1   |
| 2 | 3 | 2 | 1 | 1   | 2 | 1   | 2 | 3   |
| 1 | 1 | 2 | 2 | 2   | 1 | 1   | 1 | 2   |
| 3 | 3 | 2 | 3 | 1   | 1 | 3   | 1 | 1   |
| 1 | 3 | 1 | 3 | 1   | 1 | 3   | 1 | 1   |
| 2 | 3 | 2 | 3 | 2   | 2 | 2   | 3 | 3   |
| 2 | 3 | 1 | 3 | 1   | 2 | 3   | 3 | 1   |
| 1 | 3 | 1 | 3 | 1   | 2 | 3   | 2 | 1   |
| 2 | 2 | 3 | 3 | 2   | 3 | 3   | 3 | 2   |
| 2 | 3 | 2 | 3 | 1   | 2 | 2   | 2 | 2   |
| 2 | 2 | 1 | 3 | 1   | 3 | 2   | 2 | 3   |
| 2 | 3 | 2 | 3 | 1   | 2 | 2   | 1 | 2   |
| 2 | 2 | 3 | 3 | 2   | 1 | 3   | 2 | 2   |
| 1 | 3 | 1 | 3 | 1   | 3 | 3   | 3 | 2   |
| 2 | 3 | 1 | 3 | 999 | 2 | 3   | 2 | 2   |
| 3 | 3 | 2 | 1 | 1   | 2 | 3   | 1 | 2   |
| 1 | 2 | 1 | 3 | 1   | 1 | 3   | 2 | 2   |
| 2 | 3 | 1 | 3 | 1   | 2 | 3   | 3 | 1   |
| 1 | 3 | 1 | 3 | 1   | 1 | 3   | 2 | 2   |
| 3 | 3 | 1 | 3 | 1   | 2 | 3   | 3 | 2   |
| 1 | 3 | 3 | 3 | 1   | 1 | 3   | 1 | 2   |
| 2 | 3 | 2 | 3 | 1   | 2 | 2   | 2 | 2   |
| 2 | 3 | 3 | 3 | 1   | 2 | 3   | 3 | 3   |
| 1 | 2 | 1 | 3 | 1   | 1 | 999 | 1 | 1   |

|     |   |   |   |   |   |   |   |   |
|-----|---|---|---|---|---|---|---|---|
| 1   | 3 | 3 | 3 | 1 | 1 | 3 | 3 | 2 |
| 2   | 3 | 2 | 3 | 1 | 1 | 3 | 2 | 2 |
| 3   | 3 | 3 | 3 | 1 | 2 | 2 | 3 | 2 |
| 3   | 3 | 2 | 3 | 2 | 3 | 2 | 2 | 3 |
| 1   | 3 | 1 | 3 | 1 | 1 | 2 | 2 | 2 |
| 1   | 3 | 2 | 3 | 2 | 1 | 3 | 3 | 2 |
| 1   | 3 | 3 | 1 | 2 | 1 | 3 | 3 | 2 |
| 3   | 3 | 2 | 3 | 1 | 2 | 3 | 2 | 1 |
| 1   | 3 | 2 | 3 | 2 | 1 | 3 | 2 | 2 |
| 1   | 3 | 3 | 2 | 2 | 1 | 2 | 3 | 2 |
| 2   | 2 | 1 | 3 | 1 | 1 | 3 | 2 | 2 |
| 2   | 2 | 2 | 3 | 1 | 1 | 3 | 1 | 1 |
| 1   | 3 | 2 | 3 | 1 | 2 | 3 | 3 | 1 |
| 2   | 3 | 1 | 3 | 1 | 1 | 2 | 2 | 3 |
| 3   | 3 | 2 | 3 | 1 | 1 | 2 | 2 | 3 |
| 1   | 3 | 1 | 3 | 1 | 1 | 3 | 2 | 2 |
| 1   | 2 | 1 | 3 | 1 | 1 | 3 | 1 | 1 |
| 1   | 3 | 1 | 1 | 1 | 2 | 3 | 1 | 2 |
| 1   | 3 | 2 | 3 | 1 | 1 | 3 | 1 | 3 |
| 2   | 3 | 1 | 3 | 2 | 2 | 3 | 2 | 2 |
| 1   | 3 | 2 | 3 | 1 | 1 | 3 | 2 | 1 |
| 1   | 3 | 3 | 3 | 2 | 1 | 3 | 3 | 1 |
| 2   | 3 | 2 | 3 | 1 | 2 | 3 | 1 | 2 |
| 1   | 3 | 1 | 3 | 1 | 1 | 3 | 2 | 1 |
| 2   | 2 | 2 | 3 | 1 | 2 | 3 | 2 | 2 |
| 1   | 3 | 2 | 3 | 1 | 1 | 3 | 3 | 1 |
| 2   | 2 | 2 | 3 | 2 | 1 | 3 | 2 | 1 |
| 2   | 2 | 1 | 3 | 1 | 1 | 3 | 2 | 1 |
| 2   | 3 | 2 | 3 | 1 | 1 | 3 | 2 | 2 |
| 1   | 3 | 1 | 3 | 1 | 1 | 3 | 1 | 2 |
| 2   | 3 | 2 | 3 | 1 | 2 | 3 | 3 | 1 |
| 1   | 3 | 3 | 3 | 1 | 1 | 3 | 2 | 2 |
| 2   | 3 | 2 | 2 | 1 | 1 | 1 | 2 | 2 |
| 1   | 2 | 1 | 3 | 1 | 1 | 2 | 2 | 2 |
| 3   | 3 | 2 | 3 | 1 | 2 | 2 | 2 | 3 |
| 999 | 2 | 2 | 3 | 1 | 1 | 3 | 2 | 1 |
| 2   | 3 | 1 | 3 | 1 | 3 | 3 | 1 | 1 |
| 2   | 2 | 1 | 3 | 1 | 1 | 3 | 2 | 1 |
| 2   | 2 | 3 | 3 | 1 | 1 | 3 | 1 | 1 |
| 1   | 2 | 2 | 3 | 2 | 1 | 3 | 2 | 1 |
| 1   | 3 | 2 | 3 | 1 | 1 | 3 | 2 | 2 |
| 1   | 2 | 3 | 3 | 1 | 1 | 3 | 3 | 2 |
| 1   | 3 | 1 | 3 | 2 | 1 | 3 | 1 | 1 |
| 1   | 3 | 1 | 3 | 1 | 1 | 3 | 3 | 3 |
| 1   | 2 | 1 | 3 | 1 | 2 | 2 | 2 | 1 |
| 2   | 3 | 1 | 3 | 1 | 1 | 3 | 1 | 1 |
| 1   | 2 | 3 | 3 | 1 | 1 | 3 | 3 | 3 |
| 1   | 2 | 1 | 3 | 1 | 1 | 3 | 2 | 1 |
| 2   | 2 | 2 | 3 | 1 | 1 | 3 | 3 | 3 |
| 3   | 1 | 3 | 3 | 3 | 1 | 3 | 2 | 3 |

|   |   |   |   |   |   |   |   |     |
|---|---|---|---|---|---|---|---|-----|
| 1 | 3 | 1 | 3 | 1 | 1 | 2 | 1 | 2   |
| 1 | 2 | 3 | 3 | 2 | 1 | 3 | 3 | 2   |
| 3 | 2 | 1 | 3 | 2 | 2 | 3 | 2 | 2   |
| 2 | 3 | 3 | 3 | 1 | 2 | 3 | 3 | 2   |
| 1 | 2 | 1 | 3 | 1 | 1 | 1 | 3 | 1   |
| 1 | 2 | 2 | 3 | 1 | 1 | 2 | 3 | 1   |
| 2 | 3 | 2 | 2 | 1 | 2 | 2 | 2 | 2   |
| 1 | 3 | 2 | 3 | 1 | 2 | 3 | 1 | 1   |
| 2 | 3 | 2 | 3 | 1 | 2 | 2 | 2 | 3   |
| 3 | 3 | 3 | 3 | 2 | 2 | 3 | 2 | 2   |
| 1 | 3 | 1 | 3 | 1 | 1 | 3 | 2 | 1   |
| 1 | 2 | 3 | 3 | 1 | 1 | 3 | 2 | 3   |
| 2 | 2 | 2 | 3 | 2 | 2 | 2 | 3 | 2   |
| 2 | 3 | 2 | 3 | 1 | 3 | 2 | 3 | 999 |
| 1 | 3 | 2 | 2 | 1 | 3 | 2 | 1 | 2   |
| 3 | 3 | 3 | 3 | 1 | 2 | 3 | 3 | 3   |
| 2 | 3 | 2 | 3 | 1 | 1 | 3 | 2 | 2   |
| 1 | 3 | 1 | 3 | 1 | 1 | 2 | 2 | 3   |
| 1 | 2 | 2 | 3 | 1 | 2 | 3 | 2 | 2   |
| 2 | 3 | 2 | 3 | 1 | 1 | 2 | 2 | 2   |
| 2 | 2 | 1 | 3 | 1 | 1 | 2 | 3 | 1   |
| 3 | 2 | 3 | 3 | 3 | 1 | 2 | 3 | 2   |
| 1 | 2 | 1 | 3 | 1 | 1 | 2 | 1 | 2   |
| 2 | 3 | 3 | 3 | 1 | 2 | 3 | 3 | 1   |
| 2 | 2 | 2 | 3 | 1 | 2 | 3 | 2 | 3   |
| 1 | 2 | 2 | 2 | 1 | 1 | 2 | 1 | 2   |
| 1 | 3 | 1 | 3 | 1 | 1 | 3 | 2 | 2   |
| 2 | 3 | 2 | 3 | 1 | 2 | 3 | 1 | 2   |
| 1 | 3 | 2 | 3 | 1 | 1 | 3 | 2 | 1   |
| 1 | 3 | 2 | 3 | 1 | 1 | 3 | 3 | 1   |
| 1 | 3 | 3 | 3 | 1 | 1 | 3 | 2 | 1   |
| 1 | 3 | 2 | 3 | 1 | 1 | 3 | 3 | 2   |
| 1 | 3 | 2 | 3 | 1 | 1 | 3 | 2 | 1   |
| 1 | 2 | 1 | 3 | 1 | 1 | 3 | 3 | 3   |
| 2 | 2 | 1 | 3 | 1 | 1 | 3 | 3 | 3   |
| 3 | 3 | 2 | 3 | 1 | 1 | 3 | 3 | 2   |
| 2 | 3 | 2 | 3 | 1 | 2 | 3 | 3 | 1   |
| 1 | 3 | 2 | 3 | 1 | 2 | 3 | 1 | 3   |
| 2 | 3 | 3 | 2 | 1 | 1 | 3 | 2 | 2   |
| 3 | 2 | 2 | 3 | 2 | 2 | 2 | 3 | 2   |
| 1 | 3 | 2 | 3 | 1 | 1 | 3 | 2 | 1   |
| 2 | 3 | 2 | 3 | 1 | 1 | 3 | 2 | 2   |
| 1 | 2 | 1 | 3 | 1 | 1 | 3 | 2 | 1   |
| 1 | 2 | 3 | 3 | 1 | 1 | 3 | 1 | 2   |
| 1 | 3 | 1 | 3 | 1 | 1 | 2 | 1 | 2   |
| 2 | 3 | 3 | 3 | 1 | 1 | 2 | 2 | 2   |
| 2 | 3 | 1 | 3 | 1 | 1 | 1 | 2 | 2   |
| 1 | 3 | 2 | 3 | 1 | 2 | 2 | 3 | 2   |
| 2 | 3 | 2 | 3 | 1 | 1 | 3 | 2 | 2   |
| 2 | 3 | 2 | 3 | 1 | 1 | 3 | 2 | 1   |



|   |   |   |   |   |   |   |     |   |
|---|---|---|---|---|---|---|-----|---|
| 3 | 2 | 1 | 3 | 2 | 2 | 3 | 3   | 1 |
| 3 | 2 | 1 | 3 | 1 | 1 | 3 | 1   | 1 |
| 2 | 3 | 1 | 3 | 1 | 1 | 3 | 3   | 1 |
| 2 | 2 | 1 | 3 | 1 | 2 | 3 | 2   | 2 |
| 2 | 2 | 3 | 3 | 1 | 1 | 3 | 2   | 1 |
| 2 | 2 | 2 | 2 | 1 | 2 | 2 | 2   | 2 |
| 1 | 1 | 1 | 2 | 1 | 3 | 2 | 1   | 2 |
| 1 | 3 | 1 | 3 | 1 | 1 | 2 | 2   | 3 |
| 2 | 3 | 3 | 3 | 1 | 2 | 3 | 3   | 2 |
| 3 | 3 | 2 | 3 | 1 | 3 | 1 | 1   | 2 |
| 1 | 2 | 3 | 3 | 2 | 2 | 2 | 3   | 1 |
| 1 | 3 | 1 | 3 | 1 | 1 | 3 | 3   | 1 |
| 1 | 1 | 1 | 3 | 2 | 1 | 1 | 2   | 2 |
| 1 | 3 | 2 | 3 | 1 | 1 | 3 | 2   | 1 |
| 2 | 2 | 2 | 2 | 1 | 1 | 2 | 2   | 1 |
| 1 | 2 | 2 | 3 | 1 | 1 | 3 | 2   | 2 |
| 1 | 3 | 1 | 3 | 1 | 1 | 3 | 1   | 1 |
| 1 | 3 | 2 | 3 | 1 | 1 | 3 | 2   | 1 |
| 1 | 3 | 2 | 3 | 1 | 2 | 3 | 2   | 2 |
| 2 | 3 | 2 | 3 | 1 | 1 | 3 | 999 | 2 |
| 1 | 2 | 3 | 3 | 2 | 1 | 3 | 1   | 3 |
| 2 | 2 | 1 | 3 | 1 | 2 | 3 | 1   | 1 |
| 1 | 2 | 3 | 3 | 1 | 1 | 3 | 3   | 2 |
| 1 | 3 | 2 | 3 | 1 | 1 | 3 | 2   | 1 |
| 2 | 3 | 3 | 3 | 1 | 1 | 3 | 2   | 2 |
| 1 | 3 | 1 | 3 | 1 | 1 | 3 | 2   | 1 |
| 2 | 3 | 2 | 3 | 1 | 1 | 3 | 2   | 1 |
| 2 | 3 | 2 | 3 | 1 | 1 | 3 | 2   | 2 |
| 1 | 2 | 3 | 3 | 1 | 1 | 3 | 2   | 1 |
| 2 | 2 | 2 | 3 | 1 | 1 | 3 | 1   | 2 |
| 1 | 3 | 2 | 3 | 1 | 2 | 3 | 3   | 2 |
| 1 | 3 | 2 | 3 | 1 | 1 | 3 | 1   | 1 |
| 1 | 2 | 2 | 3 | 1 | 1 | 1 | 3   | 1 |
| 2 | 3 | 2 | 3 | 2 | 1 | 1 | 1   | 3 |
| 2 | 3 | 2 | 3 | 1 | 1 | 2 | 3   | 2 |
| 1 | 2 | 3 | 3 | 1 | 1 | 3 | 3   | 1 |
| 1 | 3 | 2 | 3 | 1 | 1 | 2 | 2   | 1 |
| 1 | 3 | 1 | 3 | 1 | 1 | 3 | 3   | 3 |
| 2 | 2 | 1 | 3 | 1 | 1 | 3 | 3   | 2 |
| 1 | 3 | 2 | 2 | 1 | 2 | 2 | 1   | 3 |
| 1 | 3 | 2 | 3 | 1 | 1 | 3 | 2   | 1 |
| 2 | 3 | 3 | 3 | 1 | 1 | 2 | 1   | 1 |
| 2 | 2 | 2 | 3 | 1 | 2 | 3 | 3   | 1 |
| 2 | 3 | 3 | 3 | 1 | 1 | 3 | 3   | 1 |
| 1 | 3 | 2 | 3 | 1 | 1 | 3 | 2   | 2 |
| 2 | 2 | 1 | 3 | 1 | 1 | 2 | 1   | 2 |
| 2 | 3 | 1 | 3 | 1 | 2 | 3 | 1   | 2 |
| 2 | 2 | 3 | 3 | 2 | 1 | 2 | 3   | 2 |
| 1 | 3 | 1 | 3 | 1 | 1 | 3 | 2   | 2 |
| 2 | 3 | 2 | 3 | 1 | 2 | 3 | 3   | 2 |

|   |   |   |   |   |   |   |   |   |
|---|---|---|---|---|---|---|---|---|
| 2 | 2 | 2 | 3 | 1 | 1 | 2 | 3 | 1 |
| 1 | 2 | 1 | 3 | 1 | 1 | 2 | 2 | 3 |
| 2 | 3 | 2 | 3 | 1 | 2 | 3 | 3 | 2 |
| 2 | 3 | 2 | 3 | 1 | 1 | 2 | 3 | 2 |
| 2 | 2 | 2 | 3 | 1 | 2 | 2 | 2 | 2 |
| 1 | 2 | 2 | 3 | 1 | 1 | 2 | 3 | 1 |
| 2 | 3 | 2 | 3 | 2 | 2 | 2 | 2 | 2 |
| 2 | 2 | 1 | 3 | 1 | 3 | 2 | 3 | 2 |
| 1 | 3 | 2 | 3 | 1 | 1 | 3 | 2 | 1 |
| 2 | 3 | 1 | 3 | 1 | 1 | 2 | 2 | 3 |
| 2 | 3 | 1 | 3 | 1 | 1 | 2 | 3 | 2 |
| 2 | 3 | 1 | 3 | 1 | 2 | 3 | 2 | 2 |
| 1 | 2 | 3 | 3 | 1 | 1 | 3 | 2 | 2 |
| 3 | 3 | 2 | 2 | 1 | 2 | 2 | 1 | 3 |
| 2 | 3 | 2 | 3 | 1 | 1 | 2 | 1 | 2 |
| 1 | 2 | 2 | 3 | 1 | 1 | 2 | 3 | 3 |
| 1 | 3 | 2 | 3 | 1 | 1 | 3 | 2 | 1 |
| 1 | 3 | 2 | 3 | 1 | 1 | 3 | 1 | 2 |
| 2 | 3 | 3 | 3 | 2 | 1 | 2 | 3 | 2 |
| 3 | 3 | 1 | 3 | 3 | 3 | 3 | 2 | 1 |
| 1 | 3 | 3 | 3 | 1 | 2 | 3 | 3 | 3 |
| 1 | 3 | 3 | 3 | 1 | 1 | 3 | 3 | 2 |
| 1 | 2 | 2 | 3 | 1 | 1 | 2 | 2 | 3 |
| 1 | 2 | 2 | 3 | 1 | 2 | 2 | 3 | 2 |
| 2 | 3 | 1 | 2 | 1 | 3 | 2 | 1 | 1 |
| 3 | 2 | 1 | 3 | 1 | 1 | 3 | 3 | 2 |
| 2 | 2 | 1 | 3 | 1 | 1 | 3 | 2 | 2 |
| 1 | 2 | 3 | 3 | 1 | 1 | 2 | 1 | 1 |
| 2 | 3 | 1 | 3 | 1 | 2 | 3 | 1 | 2 |
| 2 | 3 | 2 | 3 | 1 | 1 | 3 | 2 | 2 |
| 2 | 3 | 2 | 3 | 1 | 1 | 3 | 2 | 2 |
| 2 | 3 | 1 | 3 | 1 | 1 | 2 | 1 | 2 |
| 2 | 3 | 2 | 3 | 1 | 1 | 3 | 2 | 1 |
| 2 | 2 | 2 | 3 | 1 | 1 | 3 | 3 | 3 |
| 2 | 3 | 2 | 3 | 1 | 1 | 3 | 1 | 1 |
| 3 | 3 | 2 | 3 | 1 | 3 | 2 | 3 | 2 |
| 1 | 3 | 2 | 3 | 1 | 1 | 2 | 2 | 2 |
| 2 | 2 | 2 | 3 | 1 | 1 | 2 | 2 | 2 |
| 2 | 3 | 3 | 3 | 1 | 1 | 2 | 3 | 3 |
| 2 | 2 | 2 | 3 | 1 | 2 | 3 | 2 | 2 |
| 2 | 3 | 1 | 3 | 1 | 1 | 3 | 3 | 3 |
| 1 | 2 | 2 | 3 | 1 | 1 | 3 | 3 | 1 |
| 1 | 3 | 1 | 2 | 1 | 1 | 3 | 2 | 2 |
| 2 | 3 | 3 | 3 | 2 | 2 | 2 | 3 | 2 |
| 1 | 3 | 2 | 3 | 1 | 1 | 3 | 1 | 2 |
| 1 | 3 | 1 | 3 | 1 | 1 | 3 | 1 | 2 |
| 1 | 3 | 2 | 2 | 1 | 1 | 2 | 3 | 2 |
| 2 | 3 | 2 | 3 | 2 | 2 | 3 | 1 | 2 |
| 2 | 2 | 3 | 1 | 1 | 1 | 3 | 3 | 2 |

|     |   |   |   |   |   |   |   |     |
|-----|---|---|---|---|---|---|---|-----|
| 2   | 2 | 1 | 3 | 1 | 2 | 2 | 2 | 2   |
| 3   | 3 | 3 | 3 | 1 | 1 | 3 | 2 | 2   |
| 2   | 3 | 1 | 3 | 2 | 1 | 3 | 2 | 1   |
| 2   | 3 | 3 | 3 | 1 | 2 | 3 | 3 | 2   |
| 2   | 3 | 2 | 3 | 1 | 1 | 3 | 2 | 1   |
| 1   | 3 | 2 | 3 | 2 | 1 | 3 | 2 | 3   |
| 999 | 3 | 1 | 3 | 1 | 1 | 3 | 1 | 2   |
| 2   | 2 | 3 | 3 | 1 | 1 | 3 | 3 | 1   |
| 2   | 3 | 1 | 3 | 1 | 1 | 3 | 3 | 3   |
| 2   | 2 | 1 | 3 | 1 | 1 | 3 | 3 | 2   |
| 999 | 3 | 2 | 3 | 1 | 1 | 3 | 3 | 1   |
| 3   | 3 | 1 | 3 | 1 | 1 | 3 | 2 | 3   |
| 2   | 3 | 3 | 3 | 1 | 1 | 3 | 2 | 2   |
| 1   | 3 | 1 | 3 | 1 | 1 | 3 | 1 | 1   |
| 2   | 3 | 2 | 3 | 2 | 1 | 2 | 1 | 3   |
| 1   | 3 | 2 | 3 | 1 | 1 | 3 | 2 | 2   |
| 2   | 3 | 3 | 3 | 1 | 3 | 3 | 3 | 999 |
| 2   | 2 | 2 | 3 | 1 | 1 | 2 | 2 | 2   |
| 2   | 2 | 2 | 3 | 2 | 1 | 3 | 2 | 2   |
| 2   | 2 | 2 | 3 | 2 | 1 | 3 | 2 | 2   |
| 3   | 2 | 2 | 2 | 1 | 2 | 2 | 2 | 2   |
| 1   | 3 | 2 | 3 | 1 | 1 | 3 | 3 | 3   |
| 1   | 2 | 1 | 3 | 1 | 1 | 3 | 1 | 1   |
| 2   | 1 | 3 | 3 | 1 | 2 | 3 | 3 | 1   |
| 1   | 2 | 1 | 2 | 1 | 1 | 3 | 2 | 1   |
| 1   | 2 | 2 | 3 | 1 | 1 | 3 | 2 | 1   |
| 2   | 2 | 3 | 3 | 1 | 1 | 3 | 1 | 1   |
| 1   | 2 | 3 | 3 | 1 | 1 | 3 | 1 | 1   |
| 2   | 2 | 1 | 3 | 1 | 1 | 1 | 2 | 2   |
| 1   | 3 | 2 | 3 | 1 | 1 | 3 | 2 | 1   |
| 2   | 3 | 3 | 3 | 1 | 1 | 2 | 2 | 1   |
| 3   | 3 | 2 | 3 | 1 | 1 | 3 | 2 | 2   |
| 2   | 3 | 1 | 3 | 1 | 2 | 3 | 1 | 1   |
| 2   | 2 | 2 | 3 | 1 | 1 | 2 | 2 | 3   |
| 2   | 3 | 3 | 3 | 1 | 1 | 2 | 2 | 2   |
| 3   | 3 | 1 | 3 | 1 | 2 | 2 | 3 | 1   |
| 2   | 3 | 1 | 3 | 1 | 2 | 3 | 2 | 2   |
| 3   | 2 | 2 | 3 | 1 | 1 | 3 | 2 | 1   |
| 3   | 3 | 3 | 3 | 1 | 3 | 1 | 3 | 2   |
| 2   | 3 | 1 | 2 | 1 | 1 | 3 | 3 | 2   |
| 3   | 3 | 1 | 3 | 1 | 3 | 3 | 2 | 3   |
| 3   | 2 | 2 | 3 | 1 | 3 | 2 | 2 | 3   |
| 3   | 2 | 1 | 3 | 1 | 1 | 3 | 3 | 2   |
| 1   | 3 | 2 | 3 | 1 | 1 | 3 | 2 | 1   |
| 2   | 2 | 2 | 3 | 2 | 2 | 2 | 1 | 2   |
| 3   | 3 | 2 | 3 | 1 | 2 | 2 | 3 | 2   |
| 3   | 3 | 3 | 3 | 3 | 3 | 3 | 3 | 3   |
| 2   | 3 | 2 | 3 | 1 | 1 | 3 | 1 | 1   |
| 3   | 3 | 1 | 3 | 1 | 2 | 2 | 1 | 2   |
| 1   | 2 | 3 | 3 | 1 | 1 | 2 | 2 | 2   |

|   |     |   |     |   |   |   |   |   |
|---|-----|---|-----|---|---|---|---|---|
| 1 | 3   | 2 | 3   | 1 | 2 | 1 | 2 | 3 |
| 1 | 3   | 2 | 3   | 1 | 1 | 3 | 1 | 2 |
| 2 | 3   | 3 | 3   | 1 | 1 | 1 | 2 | 1 |
| 3 | 3   | 1 | 3   | 1 | 1 | 3 | 2 | 3 |
| 2 | 3   | 1 | 3   | 2 | 1 | 2 | 2 | 3 |
| 1 | 3   | 3 | 3   | 1 | 2 | 3 | 3 | 1 |
| 1 | 3   | 2 | 3   | 1 | 1 | 3 | 3 | 1 |
| 2 | 3   | 3 | 3   | 1 | 3 | 2 | 1 | 2 |
| 3 | 3   | 3 | 3   | 1 | 2 | 3 | 2 | 2 |
| 3 | 999 | 2 | 3   | 1 | 2 | 3 | 3 | 3 |
| 2 | 2   | 2 | 3   | 1 | 2 | 2 | 2 | 2 |
| 2 | 2   | 1 | 3   | 1 | 2 | 2 | 3 | 2 |
| 2 | 3   | 1 | 3   | 1 | 1 | 3 | 2 | 2 |
| 2 | 2   | 2 | 3   | 1 | 1 | 3 | 1 | 1 |
| 2 | 3   | 1 | 3   | 1 | 1 | 2 | 2 | 3 |
| 1 | 3   | 1 | 3   | 3 | 1 | 3 | 1 | 1 |
| 2 | 3   | 2 | 3   | 1 | 1 | 2 | 2 | 3 |
| 2 | 3   | 2 | 999 | 3 | 2 | 2 | 2 | 2 |
| 2 | 3   | 3 | 3   | 1 | 2 | 3 | 2 | 2 |
| 3 | 3   | 3 | 3   | 1 | 3 | 2 | 2 | 3 |
| 1 | 2   | 1 | 3   | 1 | 1 | 3 | 2 | 2 |
| 2 | 3   | 2 | 3   | 1 | 1 | 2 | 2 | 1 |
| 2 | 2   | 1 | 3   | 1 | 2 | 2 | 2 | 2 |
| 2 | 3   | 2 | 3   | 1 | 1 | 3 | 3 | 3 |
| 1 | 3   | 2 | 3   | 1 | 1 | 3 | 1 | 1 |
| 2 | 3   | 1 | 3   | 1 | 1 | 3 | 2 | 2 |
| 2 | 3   | 1 | 2   | 1 | 1 | 2 | 3 | 1 |
| 2 | 3   | 2 | 3   | 1 | 1 | 2 | 1 | 1 |
| 2 | 3   | 2 | 2   | 1 | 1 | 2 | 2 | 2 |
| 2 | 3   | 2 | 1   | 2 | 2 | 3 | 2 | 1 |
| 2 | 3   | 2 | 3   | 1 | 2 | 3 | 2 | 1 |
| 2 | 2   | 1 | 3   | 1 | 1 | 3 | 1 | 2 |
| 3 | 3   | 1 | 3   | 1 | 1 | 2 | 1 | 3 |
| 2 | 2   | 1 | 3   | 2 | 1 | 2 | 2 | 1 |
| 1 | 1   | 1 | 3   | 2 | 1 | 2 | 2 | 1 |
| 2 | 3   | 2 | 3   | 2 | 1 | 3 | 2 | 2 |
| 2 | 3   | 2 | 3   | 1 | 1 | 3 | 2 | 2 |
| 1 | 2   | 2 | 3   | 1 | 1 | 2 | 2 | 1 |
| 2 | 3   | 1 | 3   | 1 | 1 | 3 | 3 | 2 |
| 1 | 2   | 3 | 3   | 1 | 1 | 3 | 2 | 1 |
| 1 | 2   | 1 | 3   | 1 | 1 | 2 | 2 | 3 |
| 2 | 3   | 2 | 3   | 1 | 1 | 3 | 2 | 1 |
| 1 | 3   | 1 | 3   | 1 | 1 | 3 | 3 | 2 |
| 2 | 3   | 2 | 3   | 1 | 2 | 3 | 1 | 2 |
| 2 | 3   | 3 | 3   | 1 | 2 | 3 | 3 | 2 |
| 1 | 3   | 2 | 3   | 1 | 1 | 2 | 2 | 1 |
| 1 | 3   | 2 | 3   | 1 | 1 | 3 | 3 | 1 |
| 3 | 2   | 3 | 2   | 2 | 2 | 2 | 3 | 3 |
| 2 | 2   | 2 | 3   | 1 | 1 | 3 | 2 | 2 |
| 2 | 3   | 3 | 3   | 1 | 2 | 3 | 3 | 2 |

|   |   |   |   |   |   |   |   |   |
|---|---|---|---|---|---|---|---|---|
| 2 | 3 | 3 | 3 | 1 | 1 | 3 | 2 | 3 |
| 1 | 3 | 1 | 3 | 1 | 1 | 3 | 2 | 1 |
| 1 | 2 | 1 | 3 | 1 | 1 | 3 | 2 | 1 |
| 2 | 2 | 1 | 3 | 1 | 1 | 3 | 2 | 2 |
| 1 | 2 | 2 | 3 | 1 | 1 | 3 | 2 | 1 |
| 1 | 3 | 2 | 3 | 1 | 1 | 3 | 1 | 1 |
| 2 | 3 | 2 | 3 | 1 | 1 | 2 | 2 | 1 |
| 2 | 3 | 2 | 3 | 1 | 1 | 3 | 1 | 3 |
| 1 | 2 | 2 | 3 | 2 | 1 | 3 | 3 | 1 |
| 1 | 3 | 3 | 3 | 3 | 1 | 3 | 1 | 1 |
| 1 | 3 | 2 | 3 | 1 | 1 | 3 | 1 | 1 |
| 2 | 2 | 3 | 3 | 1 | 2 | 2 | 3 | 3 |
| 2 | 3 | 2 | 3 | 1 | 1 | 3 | 1 | 3 |
| 2 | 3 | 2 | 3 | 1 | 2 | 3 | 3 | 3 |
| 2 | 3 | 1 | 3 | 1 | 1 | 3 | 2 | 1 |
| 2 | 3 | 1 | 3 | 1 | 1 | 2 | 3 | 2 |

| SDQ17 | SDQ18 | SDQ19 | SDQ20 | SDQ21 | SDQ22 | SDQ23 | SDQ24 | SDQ25 |   |
|-------|-------|-------|-------|-------|-------|-------|-------|-------|---|
| 1     | 1     | 1     | 1     | 1     | 2     | 1     | 1     | 2     | 2 |
| 3     | 1     | 1     | 1     | 3     | 2     | 1     | 1     | 1     | 2 |
| 3     | 999   | 1     | 1     | 3     | 2     | 1     | 1     | 3     | 1 |
| 3     | 1     | 1     | 1     | 3     | 2     | 1     | 1     | 1     | 2 |
| 1     | 1     | 2     | 2     | 2     | 2     | 1     | 1     | 3     | 2 |
| 3     | 1     | 1     | 1     | 3     | 3     | 1     | 1     | 1     | 3 |
| 3     | 1     | 1     | 1     | 3     | 2     | 1     | 2     | 3     | 2 |
| 1     | 2     | 2     | 3     | 3     | 2     | 1     | 1     | 3     | 1 |
| 3     | 3     | 2     | 3     | 2     | 2     | 1     | 1     | 2     | 1 |
| 3     | 1     | 1     | 3     | 3     | 3     | 1     | 1     | 2     | 3 |
| 2     | 1     | 3     | 3     | 3     | 1     | 1     | 2     | 3     | 1 |
| 3     | 2     | 1     | 2     | 2     | 3     | 1     | 1     | 3     | 3 |
| 999   | 999   | 999   | 1     | 2     | 2     | 1     | 1     | 2     | 2 |
| 3     | 1     | 1     | 2     | 2     | 2     | 1     | 1     | 3     | 2 |
| 3     | 1     | 1     | 3     | 2     | 2     | 1     | 1     | 1     | 2 |
| 3     | 1     | 1     | 2     | 2     | 2     | 2     | 1     | 1     | 2 |
| 3     | 1     | 1     | 3     | 2     | 2     | 1     | 1     | 1     | 3 |
| 3     | 1     | 2     | 2     | 2     | 2     | 1     | 1     | 2     | 2 |
| 3     | 1     | 3     | 2     | 2     | 2     | 1     | 3     | 3     | 1 |
| 3     | 1     | 1     | 3     | 2     | 2     | 1     | 2     | 3     | 3 |
| 3     | 1     | 1     | 2     | 2     | 2     | 1     | 2     | 1     | 2 |
| 3     | 2     | 2     | 3     | 2     | 2     | 1     | 3     | 1     | 1 |
| 3     | 1     | 1     | 3     | 2     | 2     | 1     | 1     | 1     | 3 |
| 2     | 2     | 3     | 2     | 2     | 2     | 2     | 2     | 2     | 3 |
| 3     | 1     | 1     | 3     | 2     | 2     | 1     | 1     | 2     | 3 |
| 3     | 1     | 2     | 3     | 3     | 3     | 1     | 1     | 2     | 3 |
| 3     | 1     | 1     | 3     | 2     | 2     | 1     | 2     | 1     | 1 |
| 3     | 2     | 1     | 3     | 1     | 1     | 1     | 1     | 3     | 2 |
| 3     | 1     | 2     | 3     | 1     | 1     | 1     | 2     | 3     | 1 |
| 3     | 2     | 1     | 2     | 2     | 2     | 1     | 1     | 3     | 2 |
| 3     | 1     | 1     | 3     | 2     | 2     | 1     | 1     | 3     | 3 |
| 999   | 999   | 999   | 999   | 999   | 999   | 1     | 999   | 2     | 2 |
| 3     | 1     | 2     | 2     | 2     | 2     | 2     | 2     | 1     | 3 |
| 3     | 1     | 1     | 2     | 1     | 1     | 1     | 3     | 1     | 1 |
| 3     | 1     | 1     | 3     | 2     | 2     | 1     | 2     | 2     | 2 |
| 3     | 2     | 3     | 2     | 2     | 2     | 2     | 1     | 3     | 1 |
| 3     | 1     | 1     | 2     | 3     | 1     | 1     | 1     | 1     | 3 |
| 3     | 1     | 1     | 3     | 3     | 1     | 1     | 1     | 2     | 3 |
| 2     | 2     | 2     | 2     | 2     | 2     | 2     | 2     | 3     | 3 |
| 3     | 1     | 2     | 1     | 2     | 2     | 1     | 2     | 2     | 2 |
| 3     | 1     | 1     | 3     | 3     | 3     | 1     | 1     | 1     | 3 |
| 3     | 1     | 1     | 2     | 2     | 2     | 1     | 1     | 1     | 3 |
| 3     | 1     | 2     | 2     | 2     | 2     | 2     | 1     | 1     | 2 |
| 3     | 1     | 1     | 2     | 3     | 1     | 1     | 2     | 2     | 3 |
| 3     | 1     | 1     | 2     | 2     | 1     | 1     | 2     | 2     | 3 |
| 3     | 3     | 3     | 3     | 2     | 2     | 1     | 3     | 2     | 2 |
| 3     | 1     | 1     | 2     | 3     | 1     | 1     | 1     | 3     | 3 |
| 3     | 1     | 2     | 2     | 2     | 1     | 1     | 2     | 2     | 2 |
| 3     | 1     | 1     | 3     | 2     | 1     | 1     | 1     | 1     | 3 |

|   |   |   |   |   |   |   |     |   |
|---|---|---|---|---|---|---|-----|---|
| 3 | 2 | 1 | 3 | 2 | 1 | 1 | 2   | 3 |
| 3 | 3 | 2 | 3 | 2 | 1 | 1 | 999 | 2 |
| 3 | 1 | 1 | 3 | 3 | 1 | 1 | 2   | 3 |
| 3 | 1 | 1 | 2 | 2 | 1 | 1 | 1   | 1 |
| 3 | 1 | 1 | 2 | 3 | 1 | 2 | 2   | 2 |
| 3 | 1 | 1 | 2 | 2 | 1 | 1 | 2   | 2 |
| 3 | 3 | 3 | 2 | 3 | 1 | 3 | 1   | 3 |
| 3 | 2 | 1 | 3 | 2 | 1 | 1 | 2   | 2 |
| 3 | 1 | 1 | 3 | 2 | 1 | 1 | 1   | 2 |
| 3 | 1 | 1 | 2 | 2 | 1 | 3 | 2   | 2 |
| 3 | 1 | 1 | 2 | 2 | 1 | 1 | 2   | 3 |
| 3 | 2 | 1 | 2 | 2 | 1 | 1 | 2   | 2 |
| 3 | 2 | 2 | 1 | 2 | 1 | 2 | 3   | 2 |
| 3 | 1 | 1 | 2 | 2 | 1 | 1 | 1   | 2 |
| 2 | 1 | 1 | 2 | 2 | 1 | 2 | 2   | 2 |
| 3 | 1 | 1 | 2 | 3 | 1 | 2 | 1   | 2 |
| 3 | 1 | 1 | 2 | 2 | 1 | 1 | 2   | 3 |
| 3 | 1 | 1 | 2 | 2 | 1 | 1 | 1   | 2 |
| 3 | 1 | 1 | 2 | 3 | 1 | 1 | 1   | 3 |
| 3 | 1 | 2 | 3 | 3 | 1 | 1 | 1   | 2 |
| 2 | 1 | 1 | 3 | 2 | 1 | 2 | 2   | 3 |
| 3 | 2 | 1 | 3 | 2 | 1 | 1 | 2   | 3 |
| 3 | 1 | 1 | 2 | 2 | 1 | 1 | 1   | 3 |
| 3 | 2 | 3 | 3 | 1 | 2 | 2 | 3   | 2 |
| 3 | 1 | 1 | 2 | 2 | 1 | 1 | 1   | 3 |
| 3 | 1 | 2 | 2 | 3 | 1 | 1 | 1   | 3 |
| 3 | 1 | 1 | 3 | 2 | 1 | 1 | 1   | 2 |
| 3 | 1 | 1 | 3 | 2 | 1 | 1 | 2   | 3 |
| 3 | 1 | 1 | 2 | 3 | 1 | 1 | 1   | 2 |
| 3 | 1 | 3 | 3 | 3 | 1 | 1 | 1   | 2 |
| 2 | 3 | 1 | 2 | 2 | 1 | 2 | 1   | 2 |
| 3 | 2 | 2 | 3 | 2 | 1 | 2 | 2   | 2 |
| 3 | 1 | 1 | 2 | 2 | 1 | 1 | 2   | 2 |
| 3 | 1 | 3 | 2 | 2 | 1 | 1 | 1   | 2 |
| 2 | 1 | 1 | 2 | 2 | 1 | 1 | 2   | 3 |
| 3 | 1 | 1 | 2 | 2 | 1 | 1 | 1   | 3 |
| 3 | 1 | 1 | 3 | 3 | 1 | 1 | 1   | 3 |
| 3 | 1 | 1 | 3 | 3 | 1 | 1 | 1   | 3 |
| 3 | 1 | 1 | 3 | 3 | 1 | 1 | 1   | 3 |
| 3 | 1 | 1 | 3 | 2 | 1 | 1 | 2   | 3 |

|   |     |   |   |     |     |     |   |   |
|---|-----|---|---|-----|-----|-----|---|---|
| 3 | 2   | 2 | 2 | 1   | 1   | 1   | 1 | 1 |
| 3 | 1   | 2 | 2 | 1   | 1   | 1   | 1 | 2 |
| 3 | 2   | 1 | 3 | 3   | 1   | 1   | 1 | 3 |
| 3 | 1   | 2 | 3 | 2   | 1   | 1   | 2 | 2 |
| 3 | 1   | 1 | 2 | 3   | 1   | 1   | 1 | 2 |
| 3 | 1   | 1 | 3 | 3   | 999 | 1   | 2 | 3 |
| 3 | 2   | 1 | 2 | 2   | 1   | 2   | 3 | 2 |
| 3 | 3   | 3 | 3 | 3   | 3   | 3   | 3 | 3 |
| 3 | 1   | 1 | 2 | 2   | 1   | 2   | 1 | 1 |
| 3 | 1   | 1 | 2 | 3   | 1   | 1   | 1 | 3 |
| 3 | 1   | 2 | 1 | 3   | 1   | 2   | 1 | 2 |
| 3 | 1   | 1 | 3 | 3   | 1   | 2   | 1 | 2 |
| 2 | 1   | 2 | 2 | 1   | 1   | 2   | 1 | 2 |
| 3 | 1   | 1 | 2 | 2   | 1   | 1   | 1 | 2 |
| 3 | 1   | 1 | 3 | 3   | 1   | 1   | 1 | 3 |
| 3 | 2   | 1 | 2 | 3   | 1   | 1   | 1 | 3 |
| 2 | 1   | 2 | 3 | 2   | 1   | 999 | 2 | 2 |
| 3 | 1   | 1 | 2 | 2   | 1   | 1   | 1 | 2 |
| 3 | 2   | 1 | 3 | 3   | 1   | 2   | 1 | 3 |
| 3 | 2   | 2 | 3 | 2   | 1   | 3   | 1 | 3 |
| 3 | 1   | 1 | 2 | 2   | 1   | 1   | 1 | 2 |
| 3 | 3   | 1 | 2 | 999 | 1   | 1   | 1 | 2 |
| 3 | 2   | 1 | 2 | 2   | 1   | 1   | 1 | 2 |
| 3 | 2   | 1 | 2 | 1   | 1   | 2   | 1 | 2 |
| 3 | 2   | 2 | 3 | 2   | 1   | 2   | 3 | 2 |
| 3 | 1   | 2 | 2 | 1   | 1   | 1   | 1 | 2 |
| 3 | 2   | 1 | 2 | 2   | 1   | 1   | 2 | 2 |
| 3 | 3   | 2 | 3 | 3   | 1   | 2   | 3 | 2 |
| 3 | 1   | 1 | 2 | 2   | 1   | 2   | 3 | 2 |
| 3 | 2   | 3 | 3 | 3   | 1   | 3   | 2 | 3 |
| 3 | 2   | 1 | 3 | 3   | 1   | 2   | 3 | 2 |
| 3 | 1   | 1 | 3 | 2   | 1   | 2   | 1 | 2 |
| 3 | 2   | 1 | 2 | 1   | 2   | 1   | 3 | 2 |
| 3 | 1   | 1 | 2 | 3   | 1   | 1   | 3 | 2 |
| 3 | 1   | 1 | 3 | 1   | 2   | 1   | 1 | 3 |
| 3 | 999 | 1 | 3 | 2   | 1   | 1   | 2 | 2 |
| 3 | 1   | 1 | 2 | 2   | 1   | 1   | 3 | 2 |
| 3 | 3   | 2 | 2 | 2   | 1   | 3   | 3 | 1 |
| 3 | 2   | 1 | 3 | 2   | 1   | 2   | 1 | 3 |
| 3 | 1   | 2 | 1 | 2   | 1   | 1   | 3 | 2 |
| 2 | 1   | 1 | 1 | 2   | 1   | 1   | 2 | 2 |
| 3 | 1   | 1 | 2 | 2   | 2   | 2   | 1 | 2 |
| 3 | 1   | 1 | 3 | 2   | 2   | 2   | 1 | 1 |
| 3 | 2   | 2 | 2 | 3   | 1   | 2   | 2 | 2 |
| 3 | 2   | 1 | 2 | 2   | 1   | 2   | 3 | 2 |
| 3 | 1   | 1 | 2 | 3   | 2   | 1   | 1 | 3 |
| 3 | 3   | 3 | 2 | 1   | 1   | 2   | 2 | 2 |
| 3 | 1   | 1 | 2 | 2   | 1   | 3   | 1 | 3 |
| 2 | 1   | 1 | 2 | 2   | 2   | 1   | 1 | 2 |
| 3 | 1   | 2 | 2 | 2   | 1   | 999 | 1 | 2 |



|   |   |   |   |   |   |   |   |     |
|---|---|---|---|---|---|---|---|-----|
| 2 | 1 | 1 | 2 | 1 | 1 | 2 | 3 | 2   |
| 3 | 1 | 1 | 3 | 3 | 1 | 1 | 2 | 2   |
| 3 | 1 | 1 | 2 | 3 | 1 | 1 | 3 | 2   |
| 3 | 1 | 1 | 2 | 2 | 3 | 2 | 2 | 2   |
| 3 | 1 | 1 | 2 | 2 | 1 | 2 | 1 | 2   |
| 3 | 1 | 1 | 3 | 3 | 1 | 1 | 1 | 3   |
| 3 | 1 | 1 | 2 | 3 | 1 | 1 | 1 | 2   |
| 3 | 1 | 2 | 3 | 3 | 1 | 2 | 1 | 3   |
| 3 | 1 | 1 | 3 | 3 | 1 | 1 | 2 | 3   |
| 3 | 1 | 2 | 3 | 2 | 1 | 2 | 1 | 2   |
| 3 | 2 | 2 | 3 | 2 | 2 | 3 | 2 | 2   |
| 3 | 1 | 1 | 3 | 3 | 1 | 1 | 3 | 1   |
| 3 | 2 | 3 | 2 | 1 | 1 | 3 | 2 | 1   |
| 3 | 3 | 2 | 3 | 2 | 1 | 1 | 2 | 2   |
| 3 | 2 | 1 | 2 | 2 | 1 | 1 | 1 | 2   |
| 3 | 2 | 2 | 2 | 2 | 1 | 1 | 2 | 2   |
| 3 | 1 | 1 | 2 | 2 | 1 | 1 | 2 | 2   |
| 3 | 1 | 1 | 3 | 3 | 1 | 1 | 1 | 3   |
| 3 | 2 | 1 | 3 | 2 | 1 | 2 | 1 | 3   |
| 3 | 1 | 3 | 3 | 2 | 1 | 3 | 2 | 1   |
| 3 | 2 | 2 | 3 | 1 | 1 | 2 | 1 | 2   |
| 3 | 2 | 1 | 3 | 1 | 1 | 2 | 2 | 1   |
| 3 | 1 | 1 | 3 | 2 | 1 | 1 | 1 | 3   |
| 3 | 1 | 1 | 3 | 2 | 1 | 1 | 2 | 2   |
| 3 | 1 | 1 | 3 | 2 | 1 | 1 | 1 | 2   |
| 3 | 1 | 2 | 3 | 2 | 1 | 1 | 2 | 2   |
| 3 | 1 | 1 | 3 | 3 | 1 | 1 | 1 | 3   |
| 3 | 2 | 2 | 3 | 2 | 1 | 1 | 2 | 1   |
| 3 | 1 | 1 | 3 | 2 | 1 | 2 | 2 | 3   |
| 3 | 2 | 3 | 3 | 2 | 2 | 3 | 3 | 2   |
| 3 | 1 | 1 | 2 | 2 | 1 | 1 | 2 | 2   |
| 3 | 2 | 2 | 1 | 1 | 2 | 2 | 1 | 2   |
| 2 | 1 | 1 | 2 | 2 | 1 | 1 | 2 | 2   |
| 2 | 1 | 1 | 2 | 2 | 1 | 1 | 2 | 2   |
| 3 | 1 | 1 | 2 | 2 | 1 | 2 | 2 | 2   |
| 2 | 1 | 1 | 2 | 2 | 1 | 1 | 1 | 2   |
| 3 | 1 | 1 | 3 | 2 | 1 | 1 | 2 | 2   |
| 3 | 1 | 1 | 2 | 2 | 1 | 1 | 2 | 2   |
| 3 | 2 | 1 | 3 | 3 | 1 | 1 | 2 | 2   |
| 3 | 2 | 2 | 3 | 2 | 1 | 3 | 2 | 3   |
| 3 | 1 | 1 | 3 | 3 | 1 | 1 | 2 | 2   |
| 3 | 1 | 1 | 3 | 3 | 1 | 1 | 2 | 3   |
| 3 | 3 | 2 | 3 | 2 | 1 | 1 | 2 | 2   |
| 3 | 1 | 1 | 2 | 2 | 1 | 1 | 2 | 2   |
| 3 | 1 | 1 | 2 | 2 | 1 | 1 | 2 | 2   |
| 3 | 1 | 1 | 3 | 2 | 1 | 1 | 1 | 2   |
| 3 | 1 | 1 | 3 | 2 | 1 | 1 | 3 | 999 |
| 3 | 1 | 1 | 3 | 2 | 1 | 1 | 1 | 3   |
| 3 | 1 | 1 | 3 | 2 | 1 | 1 | 1 | 3   |



|   |   |   |   |     |   |   |   |   |
|---|---|---|---|-----|---|---|---|---|
| 3 | 2 | 2 | 3 | 2   | 1 | 2 | 3 | 3 |
| 3 | 1 | 2 | 3 | 2   | 1 | 3 | 3 | 2 |
| 3 | 1 | 1 | 2 | 1   | 1 | 2 | 2 | 1 |
| 3 | 2 | 1 | 3 | 3   | 1 | 1 | 2 | 2 |
| 3 | 2 | 2 | 3 | 2   | 1 | 3 | 2 | 2 |
| 3 | 1 | 1 | 2 | 2   | 2 | 1 | 3 | 2 |
| 3 | 1 | 1 | 2 | 2   | 2 | 1 | 1 | 2 |
| 3 | 1 | 2 | 3 | 1   | 1 | 1 | 2 | 2 |
| 3 | 1 | 2 | 2 | 2   | 1 | 1 | 2 | 2 |
| 3 | 2 | 1 | 2 | 2   | 1 | 2 | 3 | 2 |
| 1 | 1 | 1 | 3 | 1   | 1 | 2 | 1 | 3 |
| 3 | 2 | 1 | 2 | 2   | 1 | 1 | 2 | 2 |
| 3 | 1 | 1 | 2 | 1   | 1 | 1 | 3 | 2 |
| 3 | 1 | 2 | 3 | 2   | 1 | 2 | 3 | 2 |
| 3 | 2 | 2 | 3 | 3   | 2 | 2 | 3 | 3 |
| 3 | 1 | 1 | 2 | 2   | 1 | 2 | 1 | 2 |
| 3 | 1 | 1 | 3 | 2   | 1 | 1 | 1 | 2 |
| 3 | 1 | 1 | 2 | 2   | 2 | 1 | 3 | 1 |
| 3 | 2 | 3 | 3 | 2   | 1 | 3 | 2 | 2 |
| 3 | 1 | 2 | 3 | 3   | 1 | 2 | 2 | 3 |
| 3 | 2 | 1 | 2 | 1   | 1 | 3 | 1 | 2 |
| 3 | 1 | 1 | 2 | 3   | 1 | 1 | 3 | 3 |
| 3 | 3 | 2 | 1 | 2   | 1 | 2 | 2 | 2 |
| 3 | 1 | 1 | 3 | 3   | 1 | 1 | 1 | 1 |
| 3 | 1 | 1 | 2 | 2   | 1 | 1 | 3 | 2 |
| 3 | 1 | 1 | 3 | 3   | 1 | 2 | 1 | 2 |
| 3 | 1 | 1 | 2 | 3   | 1 | 2 | 1 | 3 |
| 3 | 2 | 2 | 2 | 2   | 1 | 2 | 2 | 2 |
| 3 | 1 | 2 | 3 | 2   | 1 | 2 | 2 | 2 |
| 1 | 1 | 2 | 2 | 3   | 1 | 1 | 2 | 1 |
| 2 | 1 | 1 | 2 | 1   | 1 | 1 | 2 | 2 |
| 3 | 2 | 1 | 2 | 2   | 1 | 1 | 2 | 2 |
| 3 | 1 | 1 | 2 | 3   | 1 | 2 | 2 | 3 |
| 3 | 1 | 1 | 2 | 2   | 1 | 2 | 2 | 2 |
| 3 | 1 | 1 | 2 | 3   | 1 | 2 | 2 | 2 |
| 3 | 1 | 2 | 3 | 999 | 1 | 3 | 1 | 2 |
| 1 | 1 | 1 | 2 | 2   | 1 | 2 | 1 | 2 |
| 3 | 1 | 1 | 3 | 1   | 1 | 3 | 3 | 3 |
| 3 | 1 | 1 | 2 | 2   | 1 | 1 | 2 | 1 |
| 3 | 1 | 2 | 3 | 3   | 1 | 2 | 1 | 3 |
| 3 | 1 | 1 | 3 | 2   | 1 | 1 | 2 | 2 |
| 3 | 1 | 2 | 3 | 2   | 1 | 2 | 1 | 2 |
| 3 | 2 | 1 | 2 | 2   | 1 | 1 | 1 | 2 |
| 3 | 1 | 2 | 2 | 3   | 1 | 1 | 2 | 3 |
| 3 | 1 | 1 | 2 | 2   | 2 | 1 | 1 | 2 |
| 3 | 1 | 1 | 2 | 3   | 1 | 1 | 1 | 3 |
| 3 | 1 | 1 | 2 | 2   | 1 | 1 | 1 | 3 |
| 3 | 1 | 1 | 3 | 3   | 2 | 2 | 2 | 3 |
| 3 | 1 | 1 | 3 | 2   | 1 | 1 | 3 | 2 |
| 3 | 1 | 1 | 2 | 2   | 1 | 1 | 2 | 2 |

|   |   |     |   |     |   |   |   |   |
|---|---|-----|---|-----|---|---|---|---|
| 3 | 1 | 1   | 2 | 3   | 1 | 1 | 1 | 2 |
| 3 | 1 | 1   | 2 | 2   | 1 | 1 | 1 | 2 |
| 3 | 2 | 3   | 2 | 3   | 1 | 2 | 3 | 1 |
| 3 | 1 | 2   | 1 | 2   | 1 | 2 | 1 | 2 |
| 3 | 1 | 1   | 2 | 3   | 2 | 3 | 2 | 3 |
| 3 | 1 | 1   | 3 | 3   | 1 | 3 | 1 | 3 |
| 3 | 1 | 1   | 1 | 2   | 1 | 1 | 2 | 2 |
| 3 | 1 | 1   | 2 | 999 | 1 | 1 | 2 | 2 |
| 3 | 1 | 2   | 2 | 2   | 1 | 2 | 2 | 1 |
| 3 | 2 | 2   | 3 | 2   | 1 | 3 | 1 | 2 |
| 3 | 1 | 1   | 2 | 2   | 1 | 1 | 3 | 2 |
| 3 | 1 | 1   | 2 | 2   | 1 | 3 | 3 | 2 |
| 3 | 1 | 1   | 2 | 2   | 1 | 2 | 1 | 2 |
| 3 | 1 | 1   | 3 | 3   | 1 | 1 | 2 | 3 |
| 3 | 1 | 2   | 1 | 1   | 1 | 1 | 2 | 3 |
| 3 | 1 | 1   | 3 | 3   | 1 | 2 | 2 | 3 |
| 3 | 1 | 1   | 3 | 3   | 1 | 1 | 2 | 2 |
| 3 | 1 | 1   | 2 | 2   | 1 | 1 | 2 | 2 |
| 3 | 2 | 1   | 1 | 3   | 1 | 2 | 1 | 3 |
| 3 | 1 | 2   | 2 | 2   | 1 | 2 | 2 | 2 |
| 3 | 2 | 999 | 3 | 2   | 1 | 2 | 3 | 2 |
| 3 | 1 | 1   | 2 | 2   | 1 | 1 | 2 | 2 |
| 3 | 2 | 1   | 2 | 1   | 1 | 1 | 2 | 2 |
| 3 | 2 | 1   | 3 | 2   | 1 | 1 | 2 | 2 |
| 3 | 2 | 1   | 2 | 1   | 1 | 1 | 2 | 1 |
| 3 | 1 | 1   | 2 | 2   | 1 | 1 | 2 | 2 |
| 3 | 3 | 1   | 3 | 2   | 1 | 1 | 3 | 2 |
| 3 | 1 | 1   | 2 | 2   | 1 | 1 | 2 | 2 |
| 3 | 1 | 1   | 2 | 3   | 1 | 3 | 1 | 3 |
| 3 | 1 | 1   | 2 | 2   | 1 | 1 | 2 | 1 |
| 2 | 2 | 2   | 3 | 2   | 1 | 2 | 2 | 3 |
| 3 | 2 | 2   | 2 | 2   | 2 | 3 | 2 | 2 |
| 3 | 1 | 1   | 3 | 2   | 1 | 1 | 2 | 2 |
| 3 | 1 | 1   | 3 | 2   | 2 | 1 | 1 | 2 |
| 3 | 1 | 1   | 2 | 2   | 1 | 1 | 2 | 2 |
| 2 | 2 | 1   | 2 | 2   | 1 | 1 | 1 | 2 |
| 3 | 2 | 1   | 3 | 2   | 1 | 1 | 1 | 2 |
| 3 | 1 | 1   | 3 | 2   | 1 | 1 | 1 | 2 |
| 3 | 1 | 1   | 3 | 3   | 1 | 2 | 1 | 3 |
| 3 | 1 | 1   | 2 | 2   | 1 | 2 | 1 | 3 |
| 2 | 1 | 2   | 2 | 2   | 1 | 1 | 2 | 3 |
| 3 | 1 | 1   | 2 | 2   | 1 | 3 | 1 | 2 |
| 3 | 1 | 1   | 2 | 2   | 1 | 2 | 2 | 3 |
| 2 | 1 | 1   | 2 | 2   | 1 | 2 | 1 | 2 |
| 3 | 1 | 1   | 3 | 3   | 1 | 1 | 1 | 3 |
| 3 | 1 | 1   | 3 | 2   | 1 | 2 | 1 | 2 |
| 3 | 2 | 2   | 3 | 1   | 1 | 3 | 2 | 2 |
| 3 | 1 | 1   | 2 | 3   | 1 | 2 | 1 | 2 |

|   |     |     |   |   |     |   |   |   |
|---|-----|-----|---|---|-----|---|---|---|
| 3 | 1   | 999 | 2 | 3 | 1   | 2 | 1 | 2 |
| 3 | 1   | 1   | 2 | 2 | 1   | 2 | 2 | 3 |
| 3 | 1   | 1   | 2 | 2 | 1   | 2 | 1 | 3 |
| 3 | 1   | 1   | 3 | 2 | 1   | 2 | 2 | 3 |
| 3 | 2   | 1   | 2 | 3 | 1   | 1 | 2 | 3 |
| 3 | 1   | 1   | 3 | 2 | 1   | 2 | 1 | 2 |
| 3 | 1   | 1   | 2 | 1 | 1   | 1 | 3 | 1 |
| 3 | 1   | 2   | 1 | 1 | 1   | 1 | 1 | 1 |
| 3 | 2   | 1   | 3 | 2 | 1   | 2 | 2 | 2 |
| 3 | 2   | 1   | 1 | 2 | 1   | 1 | 1 | 3 |
| 3 | 1   | 1   | 2 | 2 | 1   | 1 | 1 | 2 |
| 3 | 1   | 1   | 2 | 2 | 1   | 2 | 2 | 2 |
| 3 | 999 | 1   | 2 | 1 | 1   | 1 | 1 | 2 |
| 3 | 1   | 1   | 3 | 2 | 1   | 2 | 1 | 2 |
| 3 | 1   | 1   | 2 | 2 | 1   | 2 | 1 | 3 |
| 3 | 1   | 1   | 2 | 2 | 1   | 1 | 2 | 3 |
| 3 | 1   | 1   | 2 | 2 | 1   | 1 | 1 | 3 |
| 3 | 1   | 1   | 3 | 3 | 1   | 1 | 1 | 2 |
| 3 | 1   | 1   | 3 | 2 | 2   | 1 | 1 | 2 |
| 2 | 3   | 2   | 2 | 2 | 3   | 1 | 1 | 2 |
| 1 | 2   | 1   | 2 | 1 | 1   | 2 | 1 | 2 |
| 3 | 1   | 2   | 2 | 2 | 1   | 2 | 1 | 2 |
| 3 | 2   | 1   | 2 | 2 | 1   | 1 | 1 | 2 |
| 3 | 1   | 1   | 3 | 2 | 1   | 3 | 1 | 3 |
| 3 | 1   | 1   | 2 | 2 | 1   | 1 | 1 | 2 |
| 3 | 1   | 1   | 2 | 3 | 1   | 1 | 2 | 3 |
| 3 | 2   | 1   | 2 | 2 | 1   | 1 | 1 | 2 |
| 2 | 1   | 1   | 1 | 2 | 999 | 1 | 2 | 2 |
| 2 | 1   | 2   | 1 | 2 | 1   | 1 | 2 | 2 |
| 3 | 1   | 1   | 2 | 2 | 1   | 3 | 1 | 2 |
| 1 | 2   | 1   | 3 | 1 | 1   | 1 | 1 | 3 |
| 3 | 1   | 1   | 3 | 3 | 1   | 2 | 2 | 3 |
| 3 | 2   | 3   | 3 | 2 | 2   | 1 | 2 | 2 |
| 3 | 1   | 1   | 3 | 3 | 1   | 1 | 2 | 3 |
| 3 | 1   | 2   | 2 | 2 | 1   | 2 | 2 | 2 |
| 3 | 1   | 2   | 3 | 2 | 1   | 2 | 3 | 2 |
| 3 | 1   | 1   | 2 | 2 | 1   | 2 | 2 | 2 |
| 3 | 1   | 1   | 2 | 2 | 2   | 1 | 1 | 1 |
| 3 | 1   | 1   | 2 | 2 | 1   | 1 | 2 | 2 |
| 2 | 1   | 1   | 2 | 2 | 2   | 1 | 3 | 2 |
| 3 | 1   | 1   | 3 | 3 | 1   | 2 | 1 | 3 |
| 3 | 999 | 1   | 3 | 2 | 1   | 3 | 2 | 2 |
| 3 | 1   | 2   | 2 | 2 | 1   | 1 | 2 | 2 |
| 3 | 1   | 1   | 2 | 2 | 1   | 2 | 2 | 3 |
| 3 | 1   | 1   | 2 | 2 | 2   | 1 | 2 | 2 |
| 3 | 1   | 2   | 3 | 3 | 1   | 2 | 3 | 2 |
| 3 | 1   | 2   | 2 | 3 | 1   | 1 | 2 | 3 |
| 3 | 2   | 2   | 2 | 3 | 1   | 2 | 1 | 3 |
| 3 | 1   | 1   | 2 | 3 | 1   | 2 | 2 | 3 |
| 3 | 1   | 1   | 3 | 2 | 1   | 1 | 3 | 2 |

|   |   |   |   |   |   |   |   |   |
|---|---|---|---|---|---|---|---|---|
| 3 | 2 | 3 | 3 | 2 | 1 | 3 | 3 | 2 |
| 3 | 1 | 1 | 2 | 2 | 1 | 2 | 2 | 2 |
| 3 | 1 | 1 | 2 | 2 | 1 | 1 | 1 | 2 |
| 3 | 1 | 1 | 2 | 3 | 1 | 2 | 1 | 2 |
| 3 | 2 | 1 | 2 | 2 | 1 | 1 | 1 | 3 |
| 3 | 2 | 2 | 3 | 3 | 2 | 3 | 2 | 2 |
| 3 | 1 | 1 | 2 | 2 | 1 | 2 | 1 | 2 |
| 3 | 1 | 3 | 3 | 2 | 1 | 2 | 2 | 2 |
| 3 | 1 | 2 | 2 | 2 | 1 | 2 | 3 | 2 |
| 3 | 1 | 1 | 2 | 2 | 1 | 1 | 2 | 3 |
| 3 | 1 | 1 | 3 | 2 | 1 | 2 | 2 | 2 |
| 3 | 1 | 2 | 3 | 3 | 1 | 1 | 1 | 1 |
| 3 | 1 | 1 | 2 | 3 | 1 | 3 | 2 | 3 |
| 3 | 1 | 1 | 3 | 2 | 1 | 2 | 2 | 2 |
| 3 | 2 | 1 | 3 | 2 | 1 | 1 | 3 | 2 |
| 3 | 1 | 1 | 3 | 3 | 1 | 2 | 2 | 3 |
| 3 | 2 | 2 | 2 | 3 | 1 | 2 | 1 | 2 |
| 3 | 1 | 2 | 3 | 2 | 1 | 3 | 1 | 2 |
| 3 | 1 | 2 | 2 | 3 | 1 | 1 | 2 | 2 |
| 3 | 2 | 3 | 2 | 2 | 1 | 1 | 2 | 2 |
| 3 | 2 | 1 | 1 | 1 | 1 | 2 | 1 | 2 |
| 3 | 1 | 1 | 3 | 2 | 1 | 2 | 1 | 2 |
| 3 | 1 | 1 | 2 | 1 | 1 | 1 | 1 | 2 |
| 3 | 1 | 1 | 3 | 3 | 1 | 1 | 2 | 2 |
| 3 | 1 | 1 | 2 | 3 | 1 | 3 | 1 | 2 |
| 3 | 2 | 2 | 3 | 2 | 1 | 2 | 2 | 3 |
| 2 | 1 | 1 | 2 | 2 | 1 | 1 | 1 | 2 |
| 3 | 1 | 1 | 3 | 3 | 1 | 2 | 1 | 2 |
| 3 | 1 | 1 | 2 | 3 | 1 | 2 | 1 | 3 |
| 3 | 1 | 1 | 3 | 2 | 1 | 2 | 1 | 2 |
| 3 | 2 | 3 | 3 | 3 | 2 | 3 | 3 | 2 |
| 3 | 1 | 1 | 3 | 3 | 1 | 1 | 1 | 1 |
| 3 | 1 | 1 | 3 | 3 | 1 | 2 | 1 | 3 |
| 3 | 1 | 1 | 2 | 1 | 2 | 1 | 2 | 2 |
| 2 | 1 | 1 | 2 | 3 | 1 | 1 | 1 | 3 |
| 3 | 1 | 1 | 2 | 2 | 1 | 2 | 1 | 3 |
| 3 | 2 | 1 | 3 | 2 | 1 | 2 | 1 | 2 |
| 3 | 1 | 2 | 2 | 2 | 1 | 2 | 2 | 2 |
| 3 | 1 | 1 | 3 | 3 | 1 | 2 | 1 | 2 |
| 3 | 1 | 1 | 2 | 3 | 1 | 1 | 1 | 3 |
| 3 | 1 | 1 | 2 | 2 | 1 | 1 | 1 | 3 |
| 3 | 1 | 1 | 1 | 1 | 1 | 1 | 2 | 2 |
| 3 | 1 | 1 | 3 | 3 | 1 | 1 | 1 | 3 |
| 2 | 1 | 2 | 3 | 2 | 1 | 2 | 2 | 2 |
| 3 | 1 | 1 | 2 | 2 | 2 | 2 | 1 | 1 |
| 3 | 2 | 1 | 2 | 2 | 1 | 2 | 1 | 1 |
| 2 | 1 | 1 | 2 | 3 | 1 | 1 | 1 | 3 |
| 3 | 1 | 1 | 2 | 3 | 1 | 2 | 1 | 3 |
| 3 | 1 | 1 | 3 | 2 | 1 | 1 | 1 | 3 |

|   |   |   |   |   |   |     |     |   |
|---|---|---|---|---|---|-----|-----|---|
| 3 | 1 | 1 | 2 | 2 | 1 | 3   | 1   | 2 |
| 3 | 1 | 2 | 3 | 2 | 1 | 2   | 1   | 2 |
| 3 | 1 | 1 | 2 | 2 | 1 | 1   | 1   | 2 |
| 3 | 1 | 1 | 2 | 3 | 1 | 1   | 1   | 2 |
| 3 | 1 | 1 | 2 | 3 | 1 | 999 | 2   | 2 |
| 3 | 1 | 1 | 3 | 2 | 1 | 1   | 1   | 2 |
| 3 | 1 | 1 | 3 | 2 | 2 | 1   | 1   | 2 |
| 3 | 2 | 2 | 2 | 2 | 1 | 1   | 1   | 2 |
| 3 | 1 | 2 | 3 | 2 | 1 | 2   | 2   | 2 |
| 3 | 2 | 3 | 3 | 3 | 1 | 2   | 3   | 2 |
| 3 | 2 | 2 | 2 | 2 | 1 | 1   | 1   | 2 |
| 3 | 2 | 2 | 2 | 2 | 1 | 1   | 1   | 2 |
| 2 | 2 | 3 | 2 | 2 | 2 | 1   | 2   | 2 |
| 2 | 1 | 1 | 2 | 2 | 1 | 1   | 1   | 3 |
| 2 | 2 | 2 | 3 | 1 | 1 | 2   | 2   | 2 |
| 3 | 3 | 3 | 3 | 1 | 3 | 1   | 1   | 2 |
| 3 | 2 | 1 | 2 | 2 | 2 | 2   | 2   | 1 |
| 3 | 1 | 2 | 2 | 3 | 1 | 1   | 1   | 3 |
| 3 | 2 | 2 | 2 | 2 | 1 | 1   | 3   | 2 |
| 3 | 2 | 2 | 3 | 2 | 1 | 2   | 2   | 1 |
| 3 | 1 | 1 | 3 | 1 | 2 | 1   | 999 | 3 |
| 3 | 1 | 1 | 2 | 3 | 1 | 1   | 1   | 2 |
| 3 | 2 | 1 | 3 | 3 | 1 | 2   | 1   | 3 |
| 3 | 2 | 2 | 2 | 2 | 1 | 1   | 2   | 3 |
| 3 | 2 | 1 | 2 | 2 | 1 | 2   | 1   | 2 |
| 3 | 1 | 1 | 2 | 2 | 1 | 1   | 2   | 2 |
| 3 | 1 | 2 | 3 | 3 | 1 | 1   | 1   | 3 |
| 2 | 1 | 2 | 2 | 2 | 2 | 2   | 1   | 2 |
| 2 | 2 | 1 | 1 | 1 | 1 | 2   | 1   | 1 |
| 3 | 1 | 1 | 2 | 3 | 1 | 1   | 1   | 3 |
| 3 | 1 | 1 | 3 | 3 | 1 | 1   | 1   | 3 |
| 3 | 2 | 2 | 3 | 2 | 1 | 2   | 2   | 2 |
| 2 | 1 | 1 | 2 | 2 | 1 | 2   | 1   | 2 |
| 3 | 2 | 1 | 2 | 2 | 1 | 1   | 3   | 2 |
| 2 | 1 | 3 | 3 | 2 | 1 | 1   | 2   | 3 |
| 3 | 1 | 2 | 3 | 2 | 1 | 2   | 1   | 2 |
| 3 | 2 | 2 | 2 | 3 | 1 | 2   | 1   | 2 |
| 3 | 1 | 3 | 3 | 2 | 1 | 2   | 1   | 2 |
| 3 | 1 | 2 | 1 | 2 | 1 | 2   | 1   | 1 |
| 3 | 2 | 2 | 2 | 2 | 1 | 2   | 3   | 2 |
| 3 | 1 | 2 | 3 | 2 | 1 | 1   | 2   | 3 |
| 3 | 1 | 2 | 3 | 3 | 1 | 1   | 1   | 3 |
| 3 | 2 | 1 | 2 | 2 | 1 | 1   | 2   | 2 |
| 3 | 3 | 2 | 3 | 3 | 1 | 3   | 2   | 2 |
| 3 | 2 | 2 | 3 | 2 | 1 | 2   | 2   | 3 |
| 3 | 2 | 3 | 3 | 1 | 1 | 1   | 2   | 3 |
| 3 | 1 | 1 | 3 | 3 | 1 | 1   | 1   | 3 |
| 3 | 2 | 2 | 3 | 2 | 1 | 2   | 1   | 2 |
| 3 | 1 | 1 | 3 | 2 | 1 | 2   | 1   | 2 |
| 3 | 1 | 1 | 2 | 3 | 1 | 1   | 1   | 3 |

|   |     |   |   |   |     |   |   |   |
|---|-----|---|---|---|-----|---|---|---|
| 3 | 2   | 1 | 2 | 2 | 1   | 1 | 1 | 3 |
| 3 | 1   | 1 | 2 | 2 | 1   | 1 | 3 | 2 |
| 2 | 1   | 1 | 2 | 2 | 1   | 2 | 1 | 1 |
| 3 | 2   | 2 | 3 | 3 | 1   | 2 | 1 | 2 |
| 3 | 1   | 1 | 2 | 3 | 1   | 1 | 1 | 2 |
| 2 | 2   | 1 | 3 | 1 | 2   | 2 | 2 | 2 |
| 3 | 2   | 3 | 3 | 1 | 3   | 3 | 1 | 1 |
| 3 | 3   | 2 | 3 | 2 | 1   | 2 | 2 | 3 |
| 3 | 1   | 1 | 3 | 3 | 2   | 1 | 2 | 3 |
| 3 | 2   | 3 | 2 | 3 | 1   | 2 | 3 | 1 |
| 3 | 2   | 2 | 3 | 3 | 1   | 1 | 1 | 2 |
| 3 | 1   | 1 | 2 | 1 | 1   | 2 | 1 | 3 |
| 3 | 1   | 1 | 2 | 2 | 1   | 1 | 3 | 3 |
| 3 | 1   | 2 | 2 | 3 | 1   | 2 | 1 | 3 |
| 3 | 1   | 1 | 3 | 3 | 2   | 2 | 1 | 2 |
| 3 | 1   | 1 | 3 | 3 | 1   | 1 | 1 | 2 |
| 2 | 1   | 1 | 2 | 3 | 1   | 1 | 2 | 3 |
| 3 | 1   | 1 | 3 | 3 | 1   | 1 | 2 | 2 |
| 3 | 1   | 1 | 2 | 3 | 1   | 1 | 1 | 2 |
| 3 | 2   | 1 | 2 | 3 | 1   | 1 | 1 | 3 |
| 3 | 1   | 1 | 2 | 3 | 1   | 1 | 1 | 3 |
| 3 | 3   | 1 | 2 | 1 | 3   | 1 | 1 | 1 |
| 3 | 1   | 2 | 3 | 3 | 1   | 1 | 1 | 3 |
| 3 | 1   | 1 | 1 | 2 | 1   | 1 | 1 | 2 |
| 1 | 1   | 1 | 2 | 2 | 1   | 1 | 1 | 2 |
| 3 | 1   | 1 | 3 | 3 | 1   | 1 | 1 | 2 |
| 3 | 1   | 1 | 1 | 2 | 1   | 1 | 1 | 3 |
| 3 | 2   | 2 | 3 | 3 | 1   | 2 | 1 | 3 |
| 3 | 2   | 1 | 3 | 3 | 1   | 3 | 2 | 3 |
| 3 | 1   | 1 | 3 | 3 | 1   | 1 | 1 | 3 |
| 3 | 1   | 1 | 2 | 2 | 1   | 1 | 1 | 2 |
| 3 | 3   | 1 | 3 | 3 | 1   | 1 | 3 | 2 |
| 3 | 3   | 1 | 3 | 2 | 1   | 3 | 1 | 3 |
| 3 | 2   | 1 | 2 | 2 | 1   | 1 | 1 | 2 |
| 3 | 3   | 2 | 1 | 2 | 1   | 2 | 2 | 2 |
| 3 | 1   | 1 | 2 | 2 | 1   | 2 | 1 | 2 |
| 3 | 1   | 1 | 2 | 3 | 1   | 2 | 1 | 3 |
| 3 | 1   | 1 | 2 | 2 | 1   | 2 | 1 | 2 |
| 3 | 1   | 2 | 3 | 2 | 3   | 2 | 1 | 3 |
| 3 | 1   | 1 | 2 | 2 | 999 | 2 | 1 | 3 |
| 3 | 999 | 1 | 3 | 3 | 1   | 1 | 1 | 3 |
| 3 | 1   | 1 | 2 | 2 | 2   | 2 | 1 | 1 |
| 2 | 1   | 1 | 2 | 2 | 1   | 1 | 1 | 3 |
| 3 | 2   | 3 | 3 | 3 | 1   | 1 | 1 | 3 |
| 3 | 1   | 2 | 2 | 2 | 1   | 1 | 1 | 2 |
| 3 | 1   | 1 | 3 | 3 | 1   | 2 | 2 | 3 |
| 2 | 1   | 1 | 2 | 2 | 1   | 2 | 1 | 1 |
| 3 | 1   | 1 | 2 | 2 | 1   | 2 | 1 | 2 |
| 3 | 2   | 3 | 3 | 2 | 2   | 1 | 1 | 2 |
| 3 | 1   | 1 | 2 | 2 | 1   | 1 | 1 | 3 |



|   |     |   |   |   |   |   |   |   |
|---|-----|---|---|---|---|---|---|---|
| 3 | 999 | 2 | 2 | 2 | 1 | 3 | 1 | 2 |
| 2 | 1   | 2 | 2 | 1 | 1 | 1 | 1 | 1 |
| 3 | 2   | 1 | 1 | 2 | 2 | 2 | 1 | 3 |
| 3 | 1   | 2 | 3 | 2 | 2 | 2 | 1 | 2 |
| 2 | 1   | 2 | 3 | 2 | 1 | 2 | 3 | 2 |
| 3 | 2   | 1 | 2 | 1 | 1 | 2 | 1 | 2 |
| 2 | 2   | 3 | 3 | 1 | 3 | 2 | 1 | 1 |
| 3 | 1   | 1 | 2 | 3 | 1 | 1 | 2 | 2 |
| 3 | 1   | 2 | 3 | 3 | 1 | 2 | 1 | 2 |
| 3 | 1   | 1 | 3 | 2 | 1 | 1 | 2 | 2 |
| 3 | 2   | 1 | 2 | 2 | 1 | 1 | 1 | 2 |
| 3 | 2   | 2 | 2 | 2 | 1 | 2 | 1 | 2 |
| 3 | 2   | 3 | 2 | 2 | 2 | 2 | 2 | 2 |
| 2 | 1   | 1 | 3 | 2 | 1 | 2 | 3 | 2 |
| 1 | 2   | 2 | 3 | 2 | 3 | 1 | 1 | 3 |
| 3 | 2   | 1 | 3 | 1 | 1 | 1 | 3 | 3 |
| 3 | 2   | 2 | 3 | 2 | 1 | 1 | 2 | 2 |
| 3 | 1   | 1 | 2 | 2 | 1 | 2 | 1 | 3 |
| 3 | 3   | 1 | 2 | 1 | 1 | 1 | 1 | 3 |
| 2 | 2   | 1 | 2 | 2 | 1 | 1 | 1 | 2 |
| 3 | 2   | 1 | 2 | 1 | 1 | 1 | 1 | 1 |
| 3 | 3   | 2 | 3 | 1 | 1 | 3 | 1 | 2 |
| 3 | 3   | 2 | 2 | 2 | 1 | 2 | 1 | 3 |
| 3 | 1   | 2 | 3 | 1 | 1 | 1 | 1 | 1 |
| 3 | 2   | 2 | 2 | 1 | 1 | 1 | 1 | 2 |
| 2 | 1   | 1 | 2 | 2 | 1 | 1 | 1 | 2 |
| 3 | 1   | 1 | 3 | 2 | 1 | 2 | 1 | 2 |
| 3 | 1   | 1 | 3 | 2 | 1 | 1 | 2 | 3 |
| 3 | 2   | 1 | 2 | 2 | 1 | 1 | 1 | 3 |
| 3 | 2   | 2 | 3 | 2 | 1 | 1 | 1 | 2 |
| 3 | 1   | 1 | 3 | 2 | 2 | 1 | 1 | 2 |
| 3 | 3   | 2 | 3 | 3 | 1 | 1 | 3 | 2 |
| 3 | 1   | 1 | 3 | 2 | 1 | 1 | 1 | 2 |
| 3 | 2   | 1 | 2 | 2 | 1 | 2 | 2 | 3 |
| 3 | 1   | 1 | 2 | 2 | 2 | 2 | 1 | 2 |
| 3 | 1   | 1 | 2 | 2 | 1 | 1 | 1 | 2 |
| 1 | 1   | 1 | 2 | 2 | 1 | 1 | 1 | 2 |
| 3 | 2   | 1 | 3 | 3 | 1 | 2 | 2 | 2 |
| 2 | 1   | 1 | 3 | 3 | 1 | 1 | 1 | 3 |
| 3 | 3   | 1 | 2 | 2 | 1 | 3 | 2 | 2 |
| 3 | 1   | 1 | 3 | 2 | 1 | 1 | 1 | 2 |
| 3 | 1   | 1 | 2 | 2 | 1 | 1 | 1 | 2 |
| 1 | 1   | 2 | 2 | 3 | 1 | 2 | 1 | 3 |
| 3 | 2   | 1 | 2 | 2 | 1 | 1 | 1 | 2 |
| 3 | 1   | 1 | 2 | 2 | 1 | 3 | 1 | 3 |
| 3 | 1   | 3 | 3 | 2 | 1 | 2 | 2 | 2 |
| 3 | 1   | 1 | 2 | 3 | 1 | 2 | 3 | 2 |
| 3 | 3   | 1 | 3 | 2 | 1 | 3 | 2 | 1 |
| 3 | 1   | 1 | 3 | 2 | 1 | 2 | 1 | 2 |
| 2 | 2   | 1 | 3 | 3 | 1 | 1 | 1 | 2 |

|   |     |   |   |     |   |     |   |   |
|---|-----|---|---|-----|---|-----|---|---|
| 3 | 2   | 2 | 2 | 1   | 3 | 2   | 1 | 2 |
| 2 | 1   | 1 | 2 | 3   | 1 | 1   | 1 | 3 |
| 3 | 1   | 1 | 3 | 3   | 1 | 1   | 1 | 3 |
| 3 | 1   | 2 | 3 | 2   | 1 | 2   | 1 | 2 |
| 3 | 2   | 1 | 2 | 2   | 3 | 2   | 1 | 2 |
| 2 | 2   | 2 | 2 | 2   | 1 | 1   | 1 | 2 |
| 1 | 2   | 2 | 3 | 2   | 1 | 2   | 3 | 1 |
| 3 | 1   | 2 | 1 | 3   | 1 | 1   | 2 | 2 |
| 3 | 1   | 1 | 2 | 2   | 1 | 1   | 1 | 2 |
| 3 | 3   | 3 | 2 | 2   | 1 | 2   | 1 | 2 |
| 1 | 3   | 1 | 1 | 3   | 1 | 1   | 1 | 2 |
| 3 | 1   | 2 | 2 | 2   | 1 | 1   | 1 | 3 |
| 3 | 2   | 1 | 2 | 3   | 1 | 2   | 1 | 2 |
| 3 | 1   | 1 | 2 | 2   | 1 | 1   | 1 | 2 |
| 3 | 999 | 1 | 3 | 2   | 1 | 3   | 1 | 2 |
| 3 | 999 | 1 | 3 | 3   | 1 | 999 | 1 | 3 |
| 3 | 1   | 1 | 3 | 2   | 1 | 1   | 1 | 3 |
| 3 | 1   | 1 | 2 | 2   | 1 | 1   | 1 | 2 |
| 3 | 2   | 1 | 3 | 3   | 1 | 2   | 2 | 3 |
| 3 | 2   | 2 | 2 | 1   | 2 | 1   | 1 | 2 |
| 3 | 3   | 1 | 3 | 2   | 3 | 2   | 1 | 2 |
| 3 | 2   | 2 | 2 | 2   | 1 | 1   | 1 | 2 |
| 3 | 1   | 1 | 2 | 2   | 1 | 3   | 1 | 2 |
| 3 | 1   | 1 | 3 | 3   | 1 | 2   | 1 | 3 |
| 3 | 1   | 1 | 2 | 2   | 1 | 2   | 1 | 2 |
| 3 | 1   | 1 | 2 | 3   | 1 | 1   | 1 | 2 |
| 3 | 1   | 1 | 3 | 2   | 1 | 2   | 1 | 2 |
| 3 | 2   | 1 | 3 | 3   | 1 | 1   | 2 | 2 |
| 3 | 1   | 1 | 2 | 2   | 1 | 1   | 1 | 2 |
| 3 | 1   | 1 | 2 | 2   | 1 | 1   | 1 | 3 |
| 3 | 1   | 1 | 3 | 3   | 1 | 1   | 1 | 1 |
| 3 | 1   | 1 | 3 | 999 | 3 | 1   | 1 | 3 |
| 3 | 1   | 1 | 2 | 2   | 1 | 1   | 1 | 2 |
| 3 | 1   | 2 | 3 | 3   | 1 | 3   | 1 | 2 |
| 3 | 1   | 1 | 3 | 1   | 1 | 2   | 1 | 2 |
| 3 | 1   | 1 | 2 | 3   | 1 | 2   | 1 | 2 |
| 3 | 2   | 1 | 3 | 1   | 1 | 3   | 2 | 2 |
| 3 | 1   | 1 | 3 | 2   | 1 | 2   | 1 | 2 |
| 3 | 2   | 1 | 1 | 2   | 2 | 1   | 1 | 2 |
| 2 | 2   | 1 | 3 | 2   | 1 | 3   | 1 | 2 |
| 3 | 1   | 1 | 2 | 2   | 1 | 1   | 1 | 2 |
| 3 | 2   | 2 | 2 | 2   | 1 | 2   | 1 | 2 |
| 3 | 2   | 1 | 1 | 1   | 1 | 1   | 1 | 2 |
| 3 | 1   | 2 | 3 | 3   | 1 | 1   | 1 | 2 |
| 3 | 1   | 1 | 2 | 1   | 2 | 1   | 2 | 2 |
| 3 | 1   | 1 | 2 | 2   | 2 | 2   | 1 | 2 |
| 3 | 1   | 3 | 3 | 2   | 1 | 2   | 3 | 2 |
| 1 | 2   | 1 | 2 | 2   | 3 | 3   | 2 | 2 |
| 3 | 2   | 2 | 3 | 2   | 1 | 2   | 1 | 2 |
| 3 | 1   | 2 | 2 | 3   | 1 | 1   | 2 | 1 |

|   |     |   |   |     |   |   |   |   |
|---|-----|---|---|-----|---|---|---|---|
| 3 | 1   | 1 | 2 | 1   | 1 | 2 | 1 | 2 |
| 3 | 1   | 1 | 3 | 3   | 1 | 2 | 1 | 2 |
| 3 | 1   | 1 | 3 | 2   | 1 | 2 | 1 | 2 |
| 2 | 2   | 1 | 2 | 2   | 1 | 1 | 1 | 2 |
| 2 | 1   | 1 | 2 | 3   | 1 | 1 | 1 | 2 |
| 3 | 999 | 1 | 3 | 2   | 1 | 1 | 1 | 2 |
| 3 | 2   | 1 | 2 | 2   | 1 | 2 | 1 | 2 |
| 2 | 3   | 1 | 2 | 2   | 1 | 1 | 3 | 1 |
| 3 | 2   | 2 | 3 | 3   | 1 | 2 | 1 | 2 |
| 3 | 2   | 2 | 2 | 2   | 3 | 1 | 1 | 2 |
| 3 | 2   | 1 | 2 | 2   | 1 | 2 | 2 | 3 |
| 3 | 1   | 1 | 3 | 3   | 1 | 1 | 2 | 3 |
| 3 | 1   | 2 | 1 | 2   | 1 | 1 | 1 | 2 |
| 3 | 2   | 2 | 3 | 2   | 1 | 3 | 2 | 3 |
| 3 | 2   | 1 | 2 | 2   | 1 | 1 | 1 | 2 |
| 3 | 1   | 1 | 2 | 2   | 1 | 1 | 2 | 2 |
| 3 | 1   | 1 | 3 | 3   | 1 | 2 | 2 | 2 |
| 3 | 1   | 1 | 3 | 3   | 1 | 1 | 1 | 3 |
| 3 | 2   | 2 | 3 | 2   | 1 | 1 | 1 | 2 |
| 2 | 3   | 1 | 2 | 2   | 3 | 2 | 1 | 2 |
| 3 | 1   | 1 | 3 | 2   | 2 | 3 | 3 | 2 |
| 3 | 1   | 1 | 2 | 3   | 1 | 2 | 2 | 3 |
| 3 | 1   | 1 | 2 | 2   | 1 | 1 | 1 | 2 |
| 3 | 3   | 1 | 1 | 1   | 2 | 1 | 2 | 2 |
| 3 | 2   | 1 | 2 | 999 | 2 | 2 | 1 | 2 |
| 3 | 1   | 1 | 1 | 2   | 1 | 1 | 1 | 2 |
| 3 | 2   | 1 | 2 | 3   | 1 | 1 | 1 | 2 |
| 1 | 1   | 1 | 1 | 1   | 2 | 1 | 1 | 1 |
| 3 | 1   | 2 | 3 | 3   | 1 | 2 | 1 | 3 |
| 3 | 2   | 1 | 3 | 1   | 1 | 1 | 1 | 2 |
| 3 | 1   | 3 | 2 | 1   | 1 | 1 | 2 | 2 |
| 3 | 1   | 1 | 3 | 2   | 1 | 3 | 2 | 2 |
| 3 | 1   | 1 | 3 | 3   | 1 | 2 | 1 | 3 |
| 2 | 2   | 1 | 2 | 2   | 1 | 2 | 1 | 2 |
| 3 | 2   | 1 | 2 | 2   | 1 | 2 | 2 | 2 |
| 3 | 2   | 1 | 2 | 2   | 1 | 1 | 1 | 2 |
| 3 | 1   | 2 | 2 | 1   | 1 | 3 | 2 | 2 |
| 2 | 2   | 1 | 2 | 2   | 1 | 1 | 1 | 1 |
| 3 | 1   | 1 | 1 | 3   | 1 | 2 | 1 | 2 |
| 3 | 2   | 1 | 2 | 2   | 1 | 1 | 2 | 2 |
| 3 | 2   | 1 | 3 | 2   | 1 | 1 | 1 | 2 |
| 3 | 3   | 1 | 2 | 2   | 3 | 1 | 1 | 2 |
| 2 | 3   | 1 | 1 | 1   | 2 | 1 | 1 | 1 |
| 3 | 1   | 2 | 3 | 3   | 1 | 2 | 1 | 3 |
| 3 | 2   | 3 | 2 | 2   | 1 | 2 | 2 | 3 |
| 3 | 2   | 1 | 2 | 1   | 1 | 1 | 1 | 3 |
| 3 | 1   | 1 | 2 | 2   | 1 | 2 | 2 | 2 |
| 3 | 1   | 1 | 2 | 1   | 2 | 1 | 1 | 1 |
| 3 | 2   | 1 | 3 | 2   | 1 | 2 | 1 | 3 |
| 3 | 1   | 1 | 2 | 2   | 1 | 1 | 1 | 1 |

|   |     |   |   |     |     |   |     |   |
|---|-----|---|---|-----|-----|---|-----|---|
| 3 | 2   | 1 | 2 | 3   | 1   | 2 | 2   | 3 |
| 3 | 1   | 1 | 3 | 3   | 1   | 2 | 1   | 2 |
| 1 | 1   | 1 | 3 | 3   | 1   | 3 | 1   | 2 |
| 3 | 1   | 1 | 2 | 3   | 1   | 2 | 1   | 1 |
| 3 | 2   | 1 | 3 | 2   | 1   | 2 | 1   | 3 |
| 3 | 1   | 1 | 2 | 3   | 2   | 3 | 1   | 3 |
| 2 | 2   | 1 | 3 | 2   | 1   | 1 | 1   | 3 |
| 2 | 1   | 2 | 2 | 1   | 1   | 2 | 1   | 2 |
| 3 | 2   | 1 | 1 | 2   | 1   | 3 | 1   | 1 |
| 3 | 2   | 1 | 1 | 2   | 1   | 1 | 1   | 2 |
| 3 | 2   | 1 | 1 | 2   | 1   | 1 | 1   | 1 |
| 3 | 1   | 1 | 2 | 3   | 1   | 1 | 1   | 2 |
| 3 | 1   | 1 | 3 | 3   | 1   | 1 | 1   | 3 |
| 3 | 1   | 1 | 2 | 2   | 1   | 1 | 1   | 3 |
| 2 | 999 | 1 | 3 | 2   | 1   | 1 | 2   | 3 |
| 3 | 2   | 1 | 3 | 3   | 1   | 2 | 1   | 3 |
| 3 | 2   | 2 | 3 | 2   | 2   | 2 | 1   | 2 |
| 3 | 2   | 1 | 2 | 3   | 1   | 1 | 1   | 2 |
| 3 | 1   | 1 | 2 | 3   | 1   | 2 | 999 | 2 |
| 3 | 1   | 1 | 2 | 2   | 2   | 2 | 1   | 2 |
| 3 | 1   | 2 | 2 | 3   | 1   | 2 | 1   | 2 |
| 3 | 1   | 1 | 2 | 2   | 1   | 1 | 1   | 1 |
| 3 | 1   | 1 | 3 | 3   | 1   | 1 | 1   | 3 |
| 1 | 2   | 1 | 1 | 2   | 2   | 2 | 1   | 2 |
| 3 | 1   | 1 | 2 | 2   | 1   | 2 | 1   | 3 |
| 3 | 1   | 1 | 1 | 2   | 1   | 2 | 1   | 2 |
| 2 | 2   | 1 | 1 | 2   | 1   | 1 | 1   | 2 |
| 3 | 1   | 2 | 2 | 2   | 1   | 2 | 1   | 2 |
| 3 | 1   | 1 | 2 | 3   | 1   | 2 | 1   | 3 |
| 2 | 2   | 1 | 2 | 3   | 1   | 2 | 1   | 2 |
| 3 | 1   | 2 | 3 | 3   | 2   | 2 | 1   | 2 |
| 3 | 2   | 2 | 3 | 2   | 1   | 1 | 3   | 2 |
| 3 | 1   | 2 | 3 | 2   | 1   | 2 | 1   | 2 |
| 2 | 1   | 1 | 2 | 2   | 1   | 2 | 1   | 2 |
| 3 | 2   | 2 | 3 | 2   | 2   | 2 | 1   | 2 |
| 3 | 2   | 2 | 3 | 2   | 1   | 2 | 1   | 1 |
| 3 | 1   | 1 | 2 | 3   | 2   | 2 | 1   | 2 |
| 2 | 1   | 1 | 2 | 2   | 2   | 2 | 1   | 2 |
| 1 | 3   | 3 | 2 | 1   | 1   | 3 | 1   | 1 |
| 3 | 3   | 2 | 3 | 2   | 1   | 2 | 2   | 3 |
| 3 | 3   | 1 | 3 | 3   | 1   | 3 | 3   | 3 |
| 3 | 2   | 1 | 2 | 1   | 1   | 1 | 2   | 3 |
| 2 | 1   | 2 | 2 | 999 | 999 | 1 | 1   | 2 |
| 3 | 1   | 1 | 2 | 2   | 1   | 1 | 1   | 3 |
| 3 | 1   | 1 | 2 | 2   | 1   | 1 | 2   | 2 |
| 3 | 3   | 2 | 2 | 2   | 1   | 2 | 2   | 3 |
| 1 | 3   | 2 | 3 | 3   | 1   | 3 | 3   | 1 |
| 3 | 1   | 1 | 3 | 2   | 1   | 2 | 1   | 3 |
| 3 | 1   | 2 | 3 | 3   | 1   | 2 | 2   | 3 |
| 3 | 2   | 1 | 3 | 3   | 1   | 1 | 1   | 2 |

|   |     |   |   |   |   |   |   |   |
|---|-----|---|---|---|---|---|---|---|
| 3 | 2   | 2 | 3 | 2 | 1 | 1 | 2 | 3 |
| 3 | 1   | 1 | 3 | 2 | 1 | 1 | 1 | 2 |
| 3 | 2   | 2 | 2 | 1 | 1 | 3 | 1 | 2 |
| 3 | 1   | 1 | 3 | 3 | 1 | 1 | 1 | 3 |
| 3 | 2   | 2 | 3 | 3 | 1 | 2 | 1 | 2 |
| 3 | 1   | 1 | 3 | 3 | 1 | 2 | 1 | 2 |
| 3 | 1   | 1 | 2 | 2 | 1 | 1 | 1 | 1 |
| 3 | 1   | 1 | 2 | 2 | 2 | 2 | 1 | 3 |
| 3 | 1   | 1 | 2 | 3 | 3 | 3 | 2 | 2 |
| 3 | 2   | 1 | 2 | 3 | 1 | 2 | 1 | 1 |
| 3 | 2   | 2 | 2 | 2 | 1 | 3 | 2 | 2 |
| 2 | 1   | 1 | 1 | 2 | 1 | 1 | 2 | 2 |
| 3 | 1   | 1 | 3 | 3 | 1 | 2 | 1 | 3 |
| 3 | 1   | 1 | 2 | 2 | 1 | 2 | 1 | 2 |
| 3 | 1   | 1 | 2 | 3 | 1 | 2 | 1 | 3 |
| 3 | 2   | 2 | 1 | 2 | 3 | 1 | 1 | 3 |
| 3 | 1   | 2 | 3 | 2 | 1 | 2 | 1 | 2 |
| 3 | 1   | 1 | 3 | 2 | 1 | 1 | 2 | 3 |
| 3 | 1   | 1 | 2 | 2 | 1 | 1 | 2 | 2 |
| 2 | 2   | 2 | 3 | 2 | 1 | 1 | 1 | 2 |
| 2 | 1   | 1 | 1 | 2 | 1 | 1 | 1 | 2 |
| 3 | 1   | 1 | 2 | 3 | 1 | 2 | 1 | 2 |
| 3 | 1   | 2 | 1 | 2 | 2 | 1 | 1 | 1 |
| 3 | 2   | 1 | 2 | 2 | 2 | 3 | 1 | 1 |
| 3 | 1   | 1 | 2 | 2 | 1 | 1 | 1 | 2 |
| 3 | 1   | 1 | 2 | 2 | 1 | 2 | 1 | 3 |
| 2 | 2   | 1 | 1 | 2 | 1 | 1 | 1 | 1 |
| 3 | 1   | 2 | 2 | 2 | 2 | 1 | 1 | 2 |
| 3 | 1   | 2 | 2 | 2 | 1 | 1 | 1 | 2 |
| 3 | 2   | 1 | 3 | 2 | 1 | 2 | 1 | 2 |
| 3 | 1   | 1 | 3 | 3 | 1 | 3 | 1 | 3 |
| 3 | 2   | 1 | 2 | 2 | 1 | 2 | 1 | 3 |
| 3 | 1   | 1 | 3 | 3 | 1 | 2 | 2 | 3 |
| 3 | 999 | 1 | 2 | 2 | 1 | 1 | 1 | 2 |
| 3 | 2   | 1 | 1 | 2 | 1 | 1 | 1 | 2 |
| 1 | 1   | 1 | 2 | 2 | 1 | 1 | 2 | 2 |
| 3 | 1   | 1 | 3 | 3 | 1 | 1 | 1 | 2 |
| 2 | 1   | 1 | 1 | 2 | 1 | 1 | 1 | 2 |
| 2 | 1   | 1 | 1 | 2 | 1 | 1 | 2 | 1 |
| 3 | 1   | 1 | 2 | 2 | 1 | 1 | 1 | 3 |
| 3 | 1   | 1 | 2 | 2 | 1 | 2 | 1 | 2 |
| 3 | 3   | 1 | 1 | 2 | 2 | 2 | 1 | 3 |
| 3 | 999 | 2 | 1 | 2 | 1 | 1 | 1 | 3 |
| 3 | 2   | 2 | 3 | 2 | 1 | 2 | 1 | 2 |
| 3 | 2   | 2 | 3 | 1 | 1 | 3 | 1 | 3 |
| 2 | 1   | 1 | 2 | 3 | 1 | 1 | 1 | 3 |
| 3 | 1   | 2 | 1 | 2 | 1 | 1 | 1 | 2 |
| 3 | 2   | 1 | 1 | 1 | 3 | 1 | 2 | 2 |
| 3 | 2   | 1 | 2 | 3 | 2 | 1 | 1 | 2 |
| 2 | 3   | 1 | 2 | 3 | 1 | 1 | 1 | 1 |

|   |   |   |   |   |   |   |   |   |
|---|---|---|---|---|---|---|---|---|
| 3 | 1 | 1 | 2 | 2 | 1 | 2 | 1 | 2 |
| 3 | 2 | 1 | 2 | 3 | 1 | 2 | 1 | 3 |
| 3 | 1 | 1 | 2 | 3 | 1 | 2 | 1 | 2 |
| 3 | 1 | 1 | 2 | 3 | 2 | 2 | 1 | 3 |
| 3 | 1 | 1 | 2 | 3 | 1 | 1 | 1 | 3 |
| 3 | 1 | 1 | 2 | 2 | 1 | 3 | 1 | 3 |
| 3 | 2 | 2 | 3 | 3 | 1 | 2 | 1 | 2 |
| 3 | 1 | 1 | 3 | 2 | 1 | 2 | 2 | 3 |
| 3 | 2 | 1 | 2 | 1 | 1 | 1 | 1 | 2 |
| 3 | 3 | 1 | 1 | 1 | 3 | 2 | 1 | 3 |
| 3 | 1 | 1 | 3 | 2 | 2 | 2 | 1 | 3 |
| 3 | 2 | 2 | 3 | 3 | 1 | 1 | 3 | 3 |
| 3 | 1 | 1 | 2 | 3 | 1 | 1 | 1 | 2 |
| 3 | 2 | 1 | 3 | 2 | 2 | 2 | 1 | 2 |
| 3 | 1 | 1 | 1 | 3 | 1 | 1 | 1 | 2 |
| 3 | 1 | 1 | 2 | 2 | 1 | 1 | 2 | 2 |

| BES1 | BES2 | BES3 | BES4 | BES5 | BES6 | BES7 | BES8 | BES9 |     |
|------|------|------|------|------|------|------|------|------|-----|
| 1    | 5    | 5    | 5    | 5    | 5    | 4    | 1    | 1    | 3   |
| 1    | 2    | 5    | 5    | 5    | 4    | 3    | 3    | 1    | 3   |
| 1    | 4    | 5    | 5    | 5    | 5    | 1    | 5    | 1    | 5   |
| 1    | 5    | 5    | 4    | 5    | 5    | 5    | 1    | 1    | 4   |
| 1    | 2    | 4    | 5    | 4    | 4    | 2    | 1    | 1    | 5   |
| 3    | 5    | 5    | 2    | 5    | 3    | 2    | 1    | 1    | 5   |
| 999  | 999  | 999  | 999  | 999  | 999  | 999  | 999  | 999  | 999 |
| 1    | 1    | 5    | 1    | 999  | 1    | 5    | 1    | 1    | 5   |
| 4    | 2    | 5    | 5    | 4    | 5    | 1    | 1    | 1    | 4   |
| 5    | 5    | 5    | 5    | 5    | 5    | 3    | 1    | 1    | 5   |
| 1    | 5    | 5    | 5    | 5    | 2    | 3    | 1    | 1    | 4   |
| 2    | 5    | 5    | 2    | 1    | 2    | 2    | 2    | 1    | 4   |
| 999  | 2    | 999  | 3    | 4    | 4    | 4    | 2    | 2    | 2   |
| 1    | 5    | 4    | 5    | 4    | 3    | 1    | 1    | 1    | 3   |
| 2    | 4    | 5    | 5    | 4    | 2    | 1    | 1    | 1    | 3   |
| 2    | 3    | 4    | 5    | 2    | 1    | 4    | 2    | 2    | 3   |
| 2    | 5    | 5    | 2    | 4    | 3    | 1    | 1    | 1    | 3   |
| 3    | 3    | 5    | 5    | 4    | 3    | 3    | 1    | 1    | 4   |
| 3    | 2    | 4    | 3    | 2    | 3    | 3    | 4    | 3    | 3   |
| 999  | 999  | 999  | 999  | 999  | 999  | 999  | 999  | 999  | 999 |
| 1    | 4    | 5    | 5    | 5    | 1    | 1    | 1    | 1    | 5   |
| 5    | 4    | 5    | 5    | 5    | 3    | 1    | 1    | 1    | 5   |
| 1    | 4    | 5    | 4    | 5    | 2    | 1    | 1    | 1    | 3   |
| 1    | 4    | 4    | 3    | 2    | 3    | 4    | 1    | 1    | 3   |
| 1    | 1    | 5    | 5    | 4    | 1    | 2    | 1    | 1    | 1   |
| 4    | 4    | 4    | 999  | 5    | 2    | 4    | 4    | 4    | 4   |
| 2    | 4    | 5    | 2    | 4    | 2    | 2    | 2    | 2    | 5   |
| 1    | 5    | 5    | 5    | 5    | 2    | 5    | 1    | 1    | 5   |
| 2    | 3    | 4    | 5    | 4    | 2    | 3    | 1    | 1    | 5   |
| 4    | 3    | 4    | 5    | 4    | 1    | 3    | 1    | 1    | 4   |
| 5    | 1    | 5    | 5    | 5    | 1    | 4    | 1    | 1    | 5   |
| 999  | 4    | 4    | 3    | 3    | 3    | 5    | 3    | 999  | 999 |
| 4    | 4    | 4    | 4    | 3    | 4    | 3    | 3    | 3    | 3   |
| 1    | 3    | 5    | 5    | 4    | 3    | 2    | 1    | 1    | 4   |
| 2    | 3    | 4    | 5    | 4    | 2    | 2    | 1    | 1    | 4   |
| 2    | 2    | 2    | 5    | 4    | 4    | 4    | 4    | 4    | 4   |
| 2    | 3    | 3    | 4    | 4    | 4    | 2    | 1    | 1    | 1   |
| 1    | 4    | 5    | 999  | 4    | 1    | 3    | 1    | 1    | 5   |
| 2    | 4    | 4    | 5    | 4    | 2    | 4    | 2    | 1    | 4   |
| 1    | 5    | 5    | 5    | 4    | 3    | 1    | 1    | 1    | 5   |
| 999  | 999  | 999  | 999  | 999  | 999  | 999  | 999  | 999  | 999 |
| 999  | 999  | 999  | 999  | 999  | 999  | 999  | 999  | 999  | 999 |
| 3    | 1    | 4    | 2    | 3    | 3    | 2    | 2    | 2    | 2   |
| 2    | 4    | 5    | 1    | 3    | 4    | 5    | 1    | 1    | 3   |
| 999  | 999  | 999  | 999  | 999  | 999  | 999  | 999  | 999  | 999 |
| 2    | 4    | 5    | 5    | 3    | 2    | 1    | 1    | 1    | 5   |
| 5    | 5    | 999  | 5    | 5    | 1    | 5    | 1    | 1    | 5   |
| 3    | 4    | 4    | 5    | 4    | 2    | 2    | 2    | 2    | 3   |
| 2    | 5    | 4    | 5    | 4    | 3    | 1    | 1    | 1    | 3   |

|     |     |     |     |     |     |     |     |     |
|-----|-----|-----|-----|-----|-----|-----|-----|-----|
| 2   | 3   | 4   | 5   | 4   | 1   | 1   | 1   | 5   |
| 999 | 2   | 5   | 1   | 4   | 4   | 4   | 2   | 4   |
| 2   | 1   | 4   | 4   | 5   | 3   | 1   | 3   | 5   |
| 1   | 4   | 5   | 2   | 4   | 1   | 1   | 1   | 5   |
| 2   | 2   | 4   | 5   | 5   | 2   | 1   | 1   | 5   |
| 4   | 5   | 5   | 5   | 4   | 3   | 1   | 5   | 5   |
| 4   | 4   | 5   | 1   | 4   | 1   | 1   | 1   | 5   |
| 3   | 5   | 5   | 3   | 4   | 3   | 1   | 1   | 5   |
| 2   | 3   | 4   | 2   | 4   | 3   | 2   | 1   | 3   |
| 4   | 2   | 4   | 5   | 4   | 4   | 2   | 2   | 2   |
| 1   | 3   | 5   | 4   | 5   | 5   | 4   | 1   | 5   |
| 1   | 4   | 5   | 3   | 3   | 1   | 1   | 1   | 4   |
| 5   | 1   | 2   | 5   | 1   | 1   | 1   | 1   | 1   |
| 1   | 4   | 5   | 999 | 2   | 2   | 2   | 1   | 2   |
| 1   | 5   | 5   | 4   | 5   | 1   | 1   | 1   | 5   |
| 2   | 4   | 4   | 3   | 4   | 3   | 1   | 1   | 4   |
| 4   | 4   | 5   | 5   | 4   | 2   | 1   | 1   | 3   |
| 1   | 4   | 5   | 4   | 4   | 3   | 1   | 1   | 4   |
| 999 | 999 | 999 | 999 | 999 | 999 | 999 | 999 | 999 |
| 999 | 999 | 999 | 999 | 999 | 999 | 999 | 999 | 999 |
| 3   | 4   | 5   | 5   | 5   | 3   | 2   | 1   | 5   |
| 1   | 5   | 5   | 4   | 5   | 1   | 1   | 1   | 5   |
| 999 | 999 | 999 | 999 | 999 | 999 | 999 | 999 | 999 |
| 3   | 1   | 5   | 5   | 1   | 3   | 3   | 1   | 1   |
| 2   | 2   | 999 | 999 | 999 | 999 | 999 | 999 | 999 |
| 999 | 999 | 999 | 999 | 999 | 999 | 999 | 999 | 999 |
| 999 | 999 | 999 | 999 | 999 | 999 | 999 | 999 | 999 |
| 4   | 3   | 4   | 2   | 4   | 3   | 2   | 2   | 2   |
| 1   | 5   | 5   | 5   | 5   | 2   | 1   | 1   | 5   |
| 4   | 3   | 5   | 1   | 4   | 5   | 5   | 1   | 5   |
| 2   | 5   | 5   | 5   | 3   | 3   | 1   | 1   | 1   |
| 2   | 4   | 4   | 1   | 3   | 3   | 4   | 1   | 3   |
| 1   | 5   | 5   | 1   | 5   | 5   | 1   | 1   | 5   |
| 1   | 2   | 5   | 4   | 3   | 3   | 1   | 1   | 1   |
| 1   | 4   | 4   | 1   | 3   | 1   | 2   | 1   | 5   |
| 1   | 5   | 5   | 1   | 5   | 1   | 1   | 1   | 5   |
| 4   | 4   | 5   | 5   | 3   | 3   | 2   | 1   | 4   |
| 3   | 2   | 5   | 3   | 3   | 3   | 1   | 1   | 2   |
| 1   | 2   | 5   | 3   | 999 | 2   | 1   | 1   | 5   |
| 1   | 5   | 5   | 3   | 4   | 1   | 1   | 1   | 4   |
| 5   | 5   | 5   | 5   | 4   | 3   | 1   | 1   | 5   |
| 3   | 2   | 4   | 4   | 3   | 3   | 5   | 2   | 4   |
| 1   | 5   | 4   | 5   | 3   | 4   | 1   | 3   | 4   |
| 999 | 999 | 999 | 2   | 3   | 4   | 999 | 999 | 999 |
| 5   | 3   | 5   | 2   | 4   | 2   | 5   | 1   | 2   |
| 2   | 4   | 4   | 5   | 3   | 4   | 2   | 1   | 3   |
| 5   | 5   | 5   | 5   | 4   | 1   | 1   | 1   | 4   |
| 2   | 4   | 5   | 2   | 3   | 3   | 3   | 1   | 3   |
| 5   | 2   | 5   | 3   | 3   | 4   | 1   | 1   | 4   |
| 1   | 4   | 4   | 4   | 4   | 2   | 1   | 1   | 4   |



|   |     |     |   |     |     |   |   |   |
|---|-----|-----|---|-----|-----|---|---|---|
| 1 | 2   | 5   | 1 | 2   | 1   | 5 | 3 | 5 |
| 2 | 4   | 5   | 1 | 4   | 1   | 1 | 1 | 5 |
| 2 | 2   | 5   | 4 | 4   | 3   | 2 | 1 | 5 |
| 1 | 4   | 5   | 5 | 5   | 1   | 1 | 1 | 5 |
| 2 | 5   | 5   | 5 | 5   | 2   | 2 | 1 | 5 |
| 4 | 5   | 5   | 5 | 3   | 5   | 5 | 2 | 5 |
| 1 | 5   | 4   | 5 | 4   | 3   | 1 | 1 | 4 |
| 5 | 5   | 5   | 5 | 5   | 5   | 1 | 1 | 5 |
| 5 | 3   | 3   | 3 | 5   | 3   | 3 | 4 | 3 |
| 5 | 1   | 5   | 3 | 5   | 999 | 1 | 1 | 5 |
| 4 | 2   | 4   | 4 | 4   | 4   | 3 | 2 | 3 |
| 1 | 2   | 4   | 5 | 4   | 2   | 2 | 1 | 4 |
| 1 | 5   | 5   | 1 | 1   | 1   | 5 | 5 | 1 |
| 5 | 1   | 5   | 3 | 999 | 5   | 5 | 3 | 1 |
| 4 | 3   | 5   | 3 | 5   | 4   | 2 | 1 | 5 |
| 5 | 4   | 5   | 1 | 4   | 2   | 2 | 1 | 3 |
| 1 | 5   | 5   | 5 | 4   | 3   | 2 | 1 | 3 |
| 1 | 4   | 4   | 1 | 3   | 1   | 1 | 1 | 4 |
| 1 | 5   | 5   | 5 | 5   | 1   | 5 | 1 | 5 |
| 4 | 5   | 5   | 5 | 4   | 3   | 4 | 1 | 4 |
| 1 | 4   | 4   | 5 | 4   | 2   | 1 | 1 | 4 |
| 3 | 4   | 5   | 5 | 4   | 3   | 4 | 2 | 4 |
| 1 | 4   | 5   | 4 | 5   | 1   | 1 | 1 | 5 |
| 3 | 3   | 4   | 5 | 4   | 2   | 3 | 3 | 4 |
| 3 | 999 | 2   | 3 | 4   | 2   | 1 | 2 | 4 |
| 1 | 2   | 5   | 2 | 4   | 1   | 1 | 1 | 3 |
| 2 | 4   | 5   | 4 | 4   | 3   | 4 | 2 | 4 |
| 1 | 5   | 5   | 5 | 4   | 1   | 1 | 1 | 5 |
| 2 | 3   | 3   | 5 | 2   | 3   | 2 | 1 | 3 |
| 4 | 3   | 3   | 4 | 2   | 3   | 5 | 3 | 5 |
| 3 | 2   | 4   | 4 | 3   | 3   | 4 | 1 | 5 |
| 1 | 3   | 5   | 5 | 4   | 4   | 1 | 1 | 5 |
| 4 | 4   | 3   | 5 | 4   | 3   | 1 | 2 | 2 |
| 3 | 3   | 3   | 2 | 3   | 2   | 2 | 3 | 2 |
| 2 | 1   | 1   | 3 | 2   | 2   | 3 | 1 | 2 |
| 3 | 2   | 3   | 5 | 2   | 3   | 4 | 1 | 3 |
| 1 | 4   | 4   | 5 | 3   | 3   | 1 | 1 | 4 |
| 1 | 5   | 5   | 5 | 5   | 2   | 1 | 1 | 5 |
| 1 | 4   | 4   | 3 | 5   | 1   | 1 | 1 | 4 |
| 2 | 3   | 4   | 1 | 3   | 3   | 2 | 2 | 4 |
| 4 | 3   | 5   | 5 | 4   | 3   | 2 | 1 | 4 |
| 1 | 5   | 5   | 4 | 4   | 1   | 1 | 1 | 3 |
| 1 | 5   | 4   | 2 | 4   | 2   | 2 | 2 | 3 |
| 1 | 3   | 5   | 5 | 4   | 3   | 1 | 1 | 4 |
| 3 | 2   | 4   | 5 | 3   | 3   | 4 | 4 | 4 |
| 3 | 2   | 4   | 4 | 4   | 2   | 2 | 1 | 4 |
| 1 | 5   | 5   | 5 | 5   | 4   | 1 | 1 | 5 |
| 2 | 3   | 5   | 5 | 4   | 3   | 2 | 1 | 5 |
| 2 | 4   | 4   | 5 | 4   | 3   | 1 | 1 | 4 |
| 5 | 4   | 999 | 2 | 5   | 1   | 4 | 1 | 4 |

|   |     |   |   |   |   |   |   |   |
|---|-----|---|---|---|---|---|---|---|
| 3 | 2   | 5 | 4 | 3 | 4 | 3 | 1 | 5 |
| 1 | 5   | 5 | 5 | 4 | 4 | 1 | 1 | 4 |
| 2 | 1   | 4 | 5 | 1 | 2 | 1 | 1 | 4 |
| 1 | 1   | 5 | 5 | 5 | 2 | 1 | 1 | 5 |
| 2 | 5   | 5 | 5 | 4 | 1 | 1 | 1 | 1 |
| 1 | 4   | 5 | 5 | 5 | 1 | 1 | 1 | 5 |
| 1 | 4   | 5 | 3 | 3 | 1 | 2 | 1 | 4 |
| 1 | 5   | 5 | 4 | 5 | 2 | 1 | 1 | 5 |
| 2 | 3   | 5 | 5 | 4 | 3 | 3 | 1 | 1 |
| 4 | 3   | 5 | 4 | 3 | 4 | 2 | 1 | 3 |
| 1 | 4   | 5 | 5 | 4 | 3 | 2 | 1 | 5 |
| 1 | 5   | 5 | 5 | 4 | 1 | 1 | 1 | 3 |
| 2 | 3   | 4 | 1 | 2 | 1 | 5 | 1 | 5 |
| 2 | 4   | 4 | 5 | 3 | 3 | 1 | 1 | 4 |
| 1 | 3   | 4 | 3 | 3 | 3 | 3 | 1 | 3 |
| 1 | 4   | 4 | 3 | 4 | 3 | 2 | 1 | 3 |
| 2 | 3   | 5 | 4 | 5 | 2 | 3 | 3 | 4 |
| 1 | 4   | 5 | 5 | 4 | 1 | 1 | 1 | 4 |
| 1 | 4   | 4 | 5 | 3 | 1 | 1 | 1 | 3 |
| 3 | 3   | 5 | 5 | 4 | 2 | 2 | 2 | 4 |
| 2 | 5   | 4 | 4 | 4 | 1 | 1 | 1 | 4 |
| 1 | 2   | 5 | 3 | 5 | 1 | 1 | 1 | 5 |
| 1 | 5   | 5 | 4 | 5 | 2 | 1 | 1 | 4 |
| 3 | 4   | 5 | 3 | 4 | 2 | 1 | 1 | 1 |
| 3 | 5   | 5 | 5 | 5 | 1 | 1 | 1 | 2 |
| 1 | 4   | 5 | 5 | 3 | 2 | 1 | 1 | 3 |
| 1 | 4   | 5 | 5 | 5 | 1 | 1 | 1 | 4 |
| 2 | 4   | 5 | 5 | 4 | 3 | 1 | 1 | 4 |
| 5 | 5   | 4 | 5 | 4 | 3 | 1 | 1 | 5 |
| 1 | 2   | 5 | 5 | 5 | 2 | 1 | 1 | 5 |
| 2 | 4   | 4 | 4 | 3 | 2 | 2 | 1 | 4 |
| 1 | 2   | 4 | 5 | 3 | 3 | 2 | 1 | 4 |
| 1 | 4   | 5 | 1 | 2 | 3 | 1 | 1 | 4 |
| 4 | 5   | 4 | 5 | 2 | 4 | 2 | 2 | 3 |
| 3 | 5   | 5 | 5 | 4 | 4 | 1 | 1 | 3 |
| 2 | 3   | 4 | 5 | 3 | 3 | 1 | 1 | 5 |
| 5 | 4   | 4 | 1 | 3 | 4 | 4 | 1 | 4 |
| 1 | 4   | 5 | 1 | 4 | 2 | 1 | 1 | 5 |
| 1 | 4   | 5 | 1 | 4 | 3 | 1 | 1 | 3 |
| 5 | 5   | 5 | 5 | 5 | 5 | 5 | 4 | 5 |
| 1 | 3   | 4 | 4 | 3 | 4 | 3 | 2 | 4 |
| 1 | 2   | 5 | 4 | 3 | 2 | 4 | 1 | 4 |
| 2 | 4   | 4 | 5 | 5 | 2 | 2 | 1 | 4 |
| 2 | 4   | 5 | 4 | 4 | 2 | 2 | 2 | 4 |
| 2 | 4   | 4 | 5 | 5 | 3 | 1 | 2 | 3 |
| 1 | 5   | 5 | 1 | 5 | 3 | 5 | 1 | 5 |
| 1 | 2   | 5 | 4 | 4 | 2 | 2 | 1 | 4 |
| 1 | 4   | 4 | 5 | 2 | 3 | 3 | 4 | 3 |
| 1 | 4   | 4 | 5 | 3 | 3 | 1 | 1 | 3 |
| 1 | 999 | 5 | 3 | 4 | 2 | 2 | 2 | 5 |



|   |   |   |   |   |     |   |   |   |
|---|---|---|---|---|-----|---|---|---|
| 2 | 5 | 4 | 5 | 5 | 2   | 1 | 1 | 5 |
| 3 | 3 | 4 | 5 | 4 | 3   | 2 | 1 | 3 |
| 5 | 5 | 5 | 5 | 2 | 1   | 1 | 1 | 5 |
| 2 | 3 | 5 | 5 | 3 | 2   | 4 | 1 | 4 |
| 2 | 1 | 3 | 5 | 3 | 4   | 1 | 2 | 3 |
| 1 | 5 | 5 | 5 | 4 | 1   | 1 | 1 | 2 |
| 2 | 3 | 4 | 2 | 4 | 2   | 2 | 1 | 5 |
| 1 | 5 | 4 | 5 | 5 | 1   | 1 | 1 | 4 |
| 3 | 5 | 4 | 4 | 3 | 3   | 1 | 1 | 3 |
| 4 | 3 | 5 | 3 | 2 | 2   | 2 | 2 | 4 |
| 3 | 4 | 5 | 1 | 4 | 2   | 5 | 2 | 5 |
| 1 | 5 | 5 | 4 | 3 | 3   | 1 | 1 | 4 |
| 2 | 3 | 4 | 5 | 5 | 4   | 1 | 2 | 4 |
| 1 | 5 | 5 | 5 | 5 | 4   | 1 | 1 | 5 |
| 1 | 4 | 5 | 5 | 5 | 3   | 1 | 1 | 5 |
| 5 | 4 | 4 | 4 | 5 | 2   | 2 | 1 | 4 |
| 1 | 4 | 4 | 5 | 5 | 1   | 1 | 1 | 4 |
| 2 | 4 | 5 | 5 | 4 | 3   | 2 | 1 | 4 |
| 1 | 4 | 2 | 5 | 4 | 4   | 1 | 1 | 4 |
| 2 | 5 | 5 | 5 | 2 | 4   | 1 | 2 | 3 |
| 3 | 4 | 5 | 2 | 1 | 2   | 3 | 1 | 3 |
| 2 | 4 | 5 | 4 | 3 | 1   | 1 | 1 | 3 |
| 1 | 2 | 1 | 1 | 2 | 1   | 1 | 2 | 5 |
| 4 | 4 | 4 | 1 | 4 | 1   | 4 | 4 | 4 |
| 1 | 5 | 5 | 3 | 1 | 3   | 1 | 1 | 1 |
| 5 | 4 | 5 | 2 | 5 | 1   | 4 | 1 | 4 |
| 1 | 5 | 5 | 3 | 3 | 3   | 1 | 1 | 5 |
| 2 | 1 | 5 | 5 | 5 | 3   | 2 | 1 | 5 |
| 4 | 4 | 5 | 5 | 4 | 4   | 1 | 1 | 5 |
| 1 | 5 | 5 | 2 | 5 | 1   | 1 | 1 | 5 |
| 1 | 4 | 5 | 4 | 4 | 3   | 3 | 2 | 4 |
| 4 | 3 | 4 | 2 | 3 | 4   | 1 | 3 | 1 |
| 2 | 2 | 5 | 5 | 3 | 2   | 1 | 1 | 1 |
| 3 | 4 | 5 | 5 | 4 | 3   | 2 | 1 | 4 |
| 2 | 2 | 5 | 5 | 2 | 2   | 4 | 1 | 3 |
| 1 | 5 | 5 | 5 | 4 | 999 | 4 | 2 | 4 |
| 2 | 4 | 4 | 3 | 4 | 999 | 2 | 1 | 4 |
| 2 | 1 | 5 | 5 | 1 | 1   | 2 | 3 | 2 |
| 1 | 4 | 5 | 5 | 4 | 3   | 1 | 1 | 3 |
| 2 | 4 | 5 | 4 | 5 | 4   | 1 | 1 | 4 |
| 1 | 4 | 5 | 4 | 4 | 4   | 1 | 1 | 3 |
| 2 | 4 | 4 | 5 | 4 | 3   | 1 | 2 | 4 |
| 3 | 3 | 3 | 4 | 2 | 3   | 3 | 1 | 3 |
| 2 | 4 | 4 | 5 | 4 | 2   | 2 | 1 | 3 |
| 3 | 3 | 3 | 4 | 3 | 3   | 2 | 1 | 3 |
| 1 | 2 | 4 | 5 | 3 | 3   | 2 | 1 | 3 |
| 1 | 5 | 5 | 3 | 5 | 5   | 3 | 1 | 4 |
| 3 | 3 | 1 | 3 | 4 | 1   | 1 | 1 | 4 |
| 1 | 2 | 5 | 5 | 5 | 1   | 1 | 1 | 5 |
| 2 | 4 | 5 | 5 | 3 | 3   | 2 | 2 | 4 |

|   |   |   |     |   |   |   |   |   |
|---|---|---|-----|---|---|---|---|---|
| 1 | 4 | 5 | 2   | 4 | 5 | 1 | 1 | 4 |
| 1 | 2 | 5 | 5   | 5 | 4 | 2 | 1 | 5 |
| 2 | 2 | 5 | 4   | 4 | 1 | 1 | 1 | 5 |
| 2 | 4 | 4 | 4   | 3 | 2 | 1 | 3 | 4 |
| 1 | 2 | 5 | 5   | 5 | 1 | 1 | 1 | 5 |
| 2 | 2 | 1 | 3   | 2 | 2 | 1 | 1 | 2 |
| 1 | 4 | 5 | 4   | 4 | 3 | 1 | 1 | 4 |
| 1 | 4 | 5 | 5   | 4 | 2 | 2 | 3 | 5 |
| 1 | 1 | 5 | 3   | 4 | 2 | 1 | 3 | 4 |
| 1 | 5 | 5 | 4   | 5 | 1 | 1 | 1 | 5 |
| 4 | 5 | 5 | 5   | 3 | 4 | 4 | 1 | 4 |
| 1 | 2 | 5 | 1   | 2 | 2 | 1 | 1 | 5 |
| 1 | 2 | 5 | 4   | 5 | 1 | 2 | 1 | 5 |
| 1 | 5 | 5 | 5   | 4 | 2 | 1 | 1 | 5 |
| 1 | 5 | 5 | 5   | 4 | 1 | 1 | 1 | 5 |
| 1 | 4 | 5 | 5   | 5 | 1 | 4 | 1 | 4 |
| 1 | 4 | 5 | 5   | 5 | 1 | 4 | 1 | 5 |
| 1 | 4 | 4 | 2   | 3 | 2 | 1 | 2 | 3 |
| 3 | 3 | 4 | 5   | 4 | 5 | 1 | 4 | 4 |
| 3 | 3 | 3 | 3   | 4 | 2 | 2 | 1 | 3 |
| 4 | 3 | 3 | 5   | 2 | 4 | 1 | 1 | 2 |
| 1 | 5 | 5 | 4   | 5 | 4 | 1 | 1 | 2 |
| 1 | 4 | 5 | 2   | 3 | 4 | 3 | 2 | 5 |
| 4 | 3 | 4 | 2   | 3 | 4 | 1 | 4 | 3 |
| 1 | 2 | 5 | 5   | 4 | 2 | 1 | 1 | 5 |
| 2 | 4 | 4 | 5   | 4 | 3 | 1 | 1 | 3 |
| 4 | 4 | 5 | 3   | 4 | 3 | 1 | 1 | 4 |
| 3 | 3 | 4 | 5   | 4 | 3 | 2 | 2 | 3 |
| 2 | 3 | 5 | 2   | 4 | 2 | 3 | 2 | 4 |
| 2 | 1 | 4 | 5   | 4 | 2 | 2 | 1 | 5 |
| 3 | 2 | 1 | 4   | 3 | 2 | 2 | 2 | 2 |
| 1 | 4 | 5 | 4   | 3 | 3 | 2 | 1 | 4 |
| 2 | 4 | 5 | 5   | 4 | 1 | 1 | 1 | 5 |
| 5 | 4 | 5 | 999 | 3 | 4 | 4 | 4 | 4 |
| 1 | 4 | 4 | 2   | 4 | 4 | 3 | 2 | 4 |
| 1 | 2 | 5 | 5   | 4 | 4 | 1 | 1 | 4 |
| 4 | 4 | 4 | 4   | 4 | 3 | 2 | 1 | 4 |
| 1 | 2 | 2 | 999 | 3 | 4 | 4 | 3 | 4 |
| 3 | 4 | 5 | 4   | 3 | 3 | 3 | 2 | 3 |
| 1 | 5 | 4 | 5   | 5 | 2 | 1 | 1 | 5 |
| 1 | 4 | 5 | 5   | 4 | 3 | 1 | 1 | 4 |
| 1 | 4 | 5 | 3   | 4 | 1 | 1 | 1 | 5 |
| 2 | 4 | 4 | 3   | 5 | 3 | 1 | 1 | 3 |
| 2 | 4 | 3 | 5   | 4 | 3 | 1 | 1 | 5 |
| 1 | 5 | 5 | 5   | 4 | 4 | 1 | 2 | 5 |
| 2 | 1 | 5 | 2   | 3 | 2 | 2 | 3 | 3 |
| 1 | 5 | 5 | 3   | 5 | 1 | 1 | 1 | 5 |
| 1 | 2 | 5 | 4   | 5 | 3 | 1 | 1 | 5 |
| 3 | 3 | 5 | 4   | 4 | 2 | 3 | 2 | 4 |
| 2 | 2 | 5 | 1   | 5 | 1 | 2 | 1 | 4 |

|   |   |   |   |     |     |     |     |     |
|---|---|---|---|-----|-----|-----|-----|-----|
| 1 | 4 | 5 | 4 | 5   | 2   | 1   | 1   | 4   |
| 1 | 4 | 5 | 4 | 1   | 3   | 3   | 2   | 5   |
| 4 | 3 | 5 | 2 | 2   | 3   | 4   | 1   | 4   |
| 4 | 2 | 5 | 5 | 4   | 5   | 1   | 1   | 5   |
| 4 | 4 | 4 | 5 | 4   | 3   | 2   | 2   | 4   |
| 2 | 5 | 4 | 5 | 4   | 3   | 1   | 1   | 5   |
| 2 | 5 | 5 | 2 | 5   | 1   | 2   | 2   | 5   |
| 1 | 4 | 5 | 4 | 5   | 3   | 2   | 1   | 5   |
| 3 | 4 | 4 | 1 | 3   | 3   | 2   | 2   | 4   |
| 1 | 4 | 5 | 5 | 999 | 1   | 1   | 999 | 4   |
| 1 | 1 | 5 | 5 | 5   | 5   | 1   | 1   | 1   |
| 2 | 4 | 3 | 5 | 3   | 3   | 2   | 1   | 3   |
| 1 | 1 | 4 | 2 | 3   | 3   | 2   | 4   | 3   |
| 1 | 2 | 4 | 1 | 3   | 2   | 1   | 1   | 4   |
| 2 | 3 | 5 | 3 | 4   | 1   | 2   | 3   | 4   |
| 3 | 4 | 5 | 5 | 4   | 3   | 1   | 1   | 5   |
| 1 | 4 | 5 | 1 | 4   | 1   | 1   | 1   | 2   |
| 5 | 5 | 5 | 5 | 999 | 5   | 1   | 1   | 3   |
| 1 | 5 | 5 | 5 | 5   | 4   | 1   | 1   | 5   |
| 2 | 3 | 5 | 1 | 4   | 2   | 2   | 2   | 5   |
| 4 | 5 | 4 | 4 | 5   | 3   | 2   | 2   | 3   |
| 2 | 2 | 4 | 3 | 3   | 2   | 4   | 1   | 4   |
| 3 | 1 | 2 | 2 | 4   | 3   | 3   | 1   | 4   |
| 1 | 4 | 5 | 4 | 5   | 2   | 2   | 1   | 4   |
| 1 | 5 | 5 | 5 | 5   | 4   | 1   | 1   | 4   |
| 1 | 4 | 5 | 5 | 4   | 3   | 1   | 1   | 3   |
| 4 | 2 | 5 | 5 | 4   | 3   | 2   | 4   | 3   |
| 2 | 4 | 4 | 5 | 3   | 4   | 3   | 1   | 3   |
| 4 | 3 | 5 | 3 | 4   | 4   | 4   | 1   | 5   |
| 1 | 3 | 5 | 5 | 3   | 4   | 3   | 1   | 3   |
| 1 | 4 | 3 | 5 | 4   | 1   | 3   | 2   | 3   |
| 1 | 4 | 5 | 2 | 4   | 999 | 999 | 999 | 999 |
| 2 | 4 | 5 | 5 | 3   | 3   | 1   | 1   | 3   |
| 1 | 3 | 4 | 4 | 4   | 3   | 2   | 1   | 4   |
| 2 | 5 | 4 | 3 | 5   | 2   | 1   | 1   | 4   |
| 2 | 4 | 5 | 5 | 4   | 3   | 1   | 1   | 1   |
| 1 | 5 | 4 | 3 | 4   | 2   | 1   | 1   | 5   |
| 3 | 4 | 5 | 5 | 3   | 4   | 3   | 2   | 5   |
| 1 | 4 | 5 | 5 | 4   | 3   | 1   | 1   | 4   |
| 2 | 4 | 5 | 5 | 3   | 2   | 1   | 1   | 5   |
| 1 | 2 | 5 | 4 | 4   | 2   | 2   | 1   | 2   |
| 2 | 3 | 5 | 5 | 4   | 4   | 1   | 1   | 4   |
| 1 | 4 | 5 | 3 | 4   | 2   | 1   | 5   | 4   |
| 1 | 4 | 5 | 5 | 4   | 2   | 1   | 1   | 4   |
| 2 | 4 | 3 | 4 | 3   | 3   | 1   | 1   | 3   |
| 1 | 5 | 5 | 5 | 4   | 2   | 1   | 1   | 5   |
| 4 | 4 | 4 | 4 | 4   | 3   | 2   | 1   | 5   |
| 2 | 4 | 5 | 5 | 4   | 2   | 2   | 1   | 3   |
| 1 | 5 | 5 | 5 | 4   | 4   | 1   | 1   | 4   |
| 1 | 4 | 5 | 5 | 4   | 2   | 2   | 1   | 5   |

|     |     |     |     |     |     |     |     |     |
|-----|-----|-----|-----|-----|-----|-----|-----|-----|
| 2   | 4   | 5   | 4   | 2   | 1   | 1   | 3   | 5   |
| 1   | 2   | 5   | 4   | 4   | 2   | 4   | 4   | 4   |
| 5   | 4   | 5   | 5   | 3   | 4   | 1   | 3   | 5   |
| 4   | 3   | 4   | 4   | 4   | 4   | 3   | 3   | 4   |
| 3   | 3   | 5   | 4   | 3   | 3   | 3   | 2   | 4   |
| 4   | 3   | 5   | 5   | 4   | 2   | 4   | 1   | 2   |
| 999 | 999 | 999 | 999 | 999 | 999 | 999 | 999 | 999 |
| 2   | 4   | 5   | 1   | 3   | 2   | 3   | 1   | 4   |
| 4   | 3   | 4   | 3   | 3   | 1   | 1   | 4   | 4   |
| 1   | 4   | 5   | 1   | 4   | 1   | 1   | 1   | 5   |
| 2   | 4   | 5   | 5   | 4   | 4   | 1   | 5   | 1   |
| 2   | 3   | 5   | 3   | 5   | 1   | 5   | 1   | 5   |
| 1   | 2   | 5   | 4   | 3   | 2   | 2   | 1   | 5   |
| 1   | 5   | 5   | 5   | 4   | 4   | 2   | 1   | 5   |
| 1   | 5   | 5   | 5   | 5   | 1   | 1   | 1   | 4   |
| 2   | 5   | 5   | 5   | 4   | 4   | 1   | 1   | 4   |
| 2   | 2   | 5   | 4   | 4   | 1   | 5   | 1   | 4   |
| 1   | 4   | 4   | 4   | 5   | 4   | 1   | 1   | 5   |
| 1   | 4   | 4   | 4   | 4   | 1   | 5   | 1   | 5   |
| 2   | 4   | 5   | 3   | 3   | 3   | 1   | 1   | 5   |
| 3   | 2   | 5   | 5   | 5   | 2   | 2   | 3   | 2   |
| 4   | 4   | 5   | 3   | 4   | 2   | 3   | 2   | 4   |
| 1   | 4   | 5   | 4   | 4   | 3   | 1   | 1   | 4   |
| 1   | 4   | 5   | 2   | 4   | 4   | 2   | 1   | 4   |
| 1   | 4   | 4   | 5   | 5   | 1   | 1   | 1   | 5   |
| 1   | 4   | 4   | 4   | 4   | 3   | 2   | 2   | 3   |
| 2   | 2   | 4   | 5   | 4   | 3   | 2   | 1   | 4   |
| 1   | 5   | 4   | 4   | 4   | 2   | 2   | 1   | 4   |
| 1   | 3   | 5   | 3   | 4   | 3   | 2   | 1   | 3   |
| 1   | 5   | 5   | 5   | 4   | 2   | 3   | 1   | 4   |
| 1   | 1   | 1   | 4   | 1   | 1   | 3   | 2   | 5   |
| 1   | 2   | 5   | 5   | 5   | 999 | 4   | 1   | 1   |
| 999 | 999 | 999 | 999 | 999 | 999 | 999 | 999 | 999 |
| 1   | 1   | 5   | 2   | 5   | 2   | 2   | 1   | 4   |
| 2   | 2   | 4   | 5   | 5   | 2   | 2   | 1   | 5   |
| 3   | 3   | 4   | 3   | 3   | 4   | 2   | 1   | 4   |
| 1   | 5   | 5   | 5   | 5   | 1   | 1   | 1   | 5   |
| 2   | 2   | 5   | 4   | 3   | 3   | 3   | 1   | 3   |
| 1   | 4   | 5   | 5   | 4   | 1   | 1   | 1   | 4   |
| 1   | 3   | 4   | 5   | 4   | 2   | 1   | 1   | 4   |
| 1   | 5   | 5   | 5   | 5   | 2   | 1   | 1   | 4   |
| 1   | 3   | 5   | 4   | 3   | 2   | 1   | 1   | 3   |
| 3   | 5   | 4   | 5   | 3   | 2   | 999 | 3   | 4   |
| 3   | 5   | 4   | 3   | 4   | 4   | 1   | 1   | 5   |
| 2   | 3   | 3   | 4   | 3   | 3   | 2   | 2   | 3   |
| 4   | 3   | 5   | 4   | 4   | 2   | 2   | 2   | 4   |
| 3   | 5   | 999 | 1   | 4   | 2   | 1   | 3   | 5   |
| 3   | 3   | 5   | 5   | 4   | 2   | 3   | 2   | 4   |
| 1   | 3   | 5   | 4   | 3   | 2   | 2   | 1   | 3   |
| 1   | 5   | 1   | 4   | 5   | 1   | 2   | 1   | 5   |

|     |     |     |     |     |     |     |     |     |
|-----|-----|-----|-----|-----|-----|-----|-----|-----|
| 1   | 2   | 5   | 5   | 5   | 3   | 3   | 2   | 4   |
| 2   | 4   | 5   | 5   | 5   | 1   | 5   | 1   | 5   |
| 2   | 3   | 5   | 4   | 4   | 2   | 4   | 1   | 4   |
| 1   | 5   | 5   | 5   | 4   | 1   | 1   | 1   | 4   |
| 1   | 3   | 5   | 4   | 4   | 1   | 1   | 1   | 5   |
| 1   | 4   | 5   | 3   | 4   | 2   | 2   | 1   | 4   |
| 1   | 3   | 1   | 5   | 2   | 1   | 3   | 1   | 1   |
| 3   | 3   | 4   | 5   | 4   | 3   | 4   | 1   | 4   |
| 2   | 4   | 4   | 3   | 4   | 1   | 2   | 1   | 4   |
| 3   | 2   | 4   | 3   | 3   | 3   | 3   | 3   | 3   |
| 2   | 3   | 2   | 4   | 3   | 5   | 3   | 4   | 2   |
| 5   | 4   | 3   | 1   | 3   | 3   | 4   | 2   | 3   |
| 1   | 4   | 5   | 4   | 4   | 3   | 2   | 2   | 4   |
| 1   | 3   | 5   | 4   | 3   | 2   | 3   | 999 | 3   |
| 4   | 5   | 5   | 5   | 4   | 3   | 1   | 1   | 4   |
| 4   | 3   | 1   | 2   | 3   | 4   | 1   | 2   | 1   |
| 3   | 3   | 4   | 4   | 3   | 4   | 1   | 1   | 4   |
| 999 | 999 | 999 | 999 | 999 | 999 | 999 | 999 | 999 |
| 1   | 3   | 4   | 5   | 1   | 4   | 1   | 1   | 4   |
| 5   | 2   | 3   | 4   | 1   | 3   | 2   | 4   | 2   |
| 2   | 2   | 5   | 5   | 5   | 2   | 3   | 2   | 4   |
| 2   | 1   | 3   | 1   | 2   | 2   | 2   | 3   | 3   |
| 2   | 1   | 5   | 2   | 1   | 4   | 3   | 1   | 3   |
| 2   | 3   | 4   | 5   | 4   | 3   | 2   | 1   | 2   |
| 1   | 1   | 2   | 1   | 1   | 1   | 1   | 1   | 3   |
| 2   | 3   | 4   | 5   | 4   | 4   | 2   | 1   | 4   |
| 2   | 4   | 5   | 2   | 4   | 1   | 3   | 2   | 5   |
| 5   | 2   | 5   | 3   | 4   | 3   | 4   | 999 | 5   |
| 2   | 1   | 3   | 2   | 1   | 1   | 2   | 1   | 2   |
| 1   | 5   | 5   | 2   | 3   | 4   | 1   | 1   | 5   |
| 1   | 1   | 5   | 1   | 5   | 1   | 1   | 1   | 5   |
| 2   | 2   | 4   | 3   | 2   | 1   | 1   | 3   | 2   |
| 2   | 4   | 5   | 5   | 3   | 1   | 1   | 1   | 3   |
| 2   | 3   | 4   | 2   | 4   | 2   | 4   | 5   | 4   |
| 1   | 2   | 3   | 2   | 3   | 4   | 2   | 3   | 2   |
| 4   | 3   | 2   | 3   | 2   | 2   | 2   | 3   | 2   |
| 1   | 5   | 5   | 5   | 5   | 1   | 5   | 1   | 5   |
| 2   | 3   | 4   | 3   | 4   | 4   | 3   | 2   | 4   |
| 999 | 999 | 999 | 999 | 999 | 999 | 999 | 999 | 999 |
| 999 | 999 | 999 | 999 | 999 | 999 | 999 | 999 | 999 |
| 999 | 999 | 999 | 999 | 999 | 999 | 999 | 1   | 999 |
| 2   | 2   | 5   | 5   | 2   | 5   | 5   | 2   | 4   |
| 2   | 2   | 4   | 999 | 999 | 999 | 999 | 999 | 999 |
| 5   | 4   | 3   | 4   | 5   | 5   | 5   | 4   | 4   |
| 5   | 4   | 5   | 5   | 5   | 5   | 4   | 1   | 5   |
| 1   | 5   | 5   | 5   | 3   | 4   | 1   | 1   | 5   |
| 1   | 5   | 5   | 1   | 3   | 2   | 1   | 1   | 5   |
| 2   | 4   | 4   | 2   | 4   | 2   | 2   | 1   | 4   |
| 3   | 4   | 5   | 5   | 5   | 4   | 3   | 3   | 3   |
| 5   | 1   | 1   | 1   | 1   | 2   | 1   | 5   | 5   |



|     |     |     |     |     |     |     |     |     |
|-----|-----|-----|-----|-----|-----|-----|-----|-----|
| 3   | 3   | 4   | 4   | 3   | 1   | 3   | 2   | 3   |
| 3   | 1   | 2   | 5   | 5   | 3   | 2   | 1   | 5   |
| 4   | 4   | 4   | 5   | 3   | 2   | 4   | 4   | 2   |
| 2   | 5   | 5   | 5   | 5   | 2   | 1   | 1   | 5   |
| 3   | 4   | 5   | 4   | 2   | 2   | 4   | 1   | 3   |
| 2   | 2   | 4   | 4   | 1   | 2   | 1   | 2   | 2   |
| 3   | 1   | 5   | 1   | 2   | 1   | 1   | 1   | 3   |
| 1   | 5   | 4   | 2   | 5   | 1   | 2   | 1   | 4   |
| 1   | 2   | 4   | 1   | 5   | 4   | 2   | 2   | 5   |
| 3   | 2   | 4   | 3   | 4   | 3   | 5   | 1   | 3   |
| 2   | 4   | 3   | 3   | 4   | 4   | 3   | 5   | 1   |
| 1   | 3   | 5   | 4   | 3   | 2   | 2   | 1   | 4   |
| 999 | 999 | 999 | 999 | 999 | 999 | 999 | 999 | 999 |
| 999 | 999 | 999 | 999 | 999 | 999 | 999 | 999 | 999 |
| 3   | 4   | 5   | 3   | 4   | 3   | 4   | 2   | 4   |
| 1   | 4   | 5   | 2   | 4   | 1   | 2   | 1   | 4   |
| 4   | 2   | 5   | 5   | 4   | 1   | 2   | 1   | 4   |
| 3   | 2   | 5   | 3   | 4   | 2   | 4   | 2   | 3   |
| 1   | 5   | 5   | 5   | 5   | 1   | 2   | 2   | 4   |
| 4   | 3   | 5   | 2   | 5   | 1   | 1   | 1   | 4   |
| 1   | 2   | 5   | 2   | 5   | 4   | 1   | 1   | 5   |
| 999 | 999 | 999 | 999 | 999 | 999 | 999 | 999 | 999 |
| 1   | 4   | 5   | 2   | 4   | 1   | 2   | 1   | 5   |
| 2   | 3   | 4   | 5   | 3   | 4   | 2   | 3   | 2   |
| 3   | 4   | 5   | 5   | 1   | 1   | 2   | 3   | 5   |
| 1   | 5   | 5   | 2   | 5   | 1   | 1   | 1   | 5   |
| 3   | 1   | 5   | 1   | 4   | 1   | 2   | 2   | 4   |
| 4   | 4   | 5   | 1   | 5   | 4   | 5   | 1   | 5   |
| 1   | 5   | 5   | 1   | 4   | 4   | 4   | 1   | 5   |
| 2   | 2   | 5   | 4   | 4   | 1   | 2   | 1   | 4   |
| 2   | 3   | 5   | 5   | 5   | 2   | 2   | 1   | 5   |
| 1   | 2   | 5   | 4   | 1   | 1   | 3   | 1   | 5   |
| 5   | 3   | 5   | 5   | 4   | 1   | 2   | 1   | 3   |
| 3   | 2   | 3   | 4   | 3   | 4   | 3   | 2   | 2   |
| 3   | 3   | 5   | 2   | 5   | 5   | 999 | 2   | 2   |
| 999 | 3   | 3   | 999 | 1   | 3   | 2   | 4   | 2   |
| 2   | 1   | 4   | 5   | 3   | 1   | 4   | 3   | 3   |
| 3   | 2   | 4   | 5   | 3   | 4   | 3   | 2   | 3   |
| 3   | 2   | 5   | 4   | 2   | 2   | 1   | 1   | 5   |
| 1   | 2   | 3   | 3   | 2   | 1   | 1   | 1   | 1   |
| 1   | 4   | 4   | 1   | 5   | 1   | 1   | 1   | 5   |
| 3   | 1   | 4   | 2   | 2   | 3   | 1   | 3   | 3   |
| 2   | 4   | 4   | 1   | 5   | 4   | 2   | 1   | 4   |
| 3   | 3   | 4   | 5   | 5   | 3   | 3   | 1   | 3   |
| 2   | 2   | 4   | 4   | 3   | 3   | 3   | 2   | 3   |
| 3   | 3   | 5   | 5   | 4   | 4   | 3   | 3   | 4   |
| 2   | 4   | 4   | 3   | 4   | 3   | 3   | 2   | 4   |
| 4   | 3   | 4   | 2   | 4   | 4   | 1   | 2   | 4   |
| 3   | 3   | 4   | 3   | 3   | 3   | 2   | 3   | 4   |
| 4   | 2   | 3   | 5   | 4   | 1   | 1   | 1   | 5   |

|   |     |   |   |   |     |   |   |   |
|---|-----|---|---|---|-----|---|---|---|
| 5 | 3   | 4 | 1 | 4 | 3   | 4 | 2 | 4 |
| 2 | 999 | 4 | 4 | 3 | 4   | 2 | 2 | 3 |
| 4 | 1   | 3 | 4 | 3 | 2   | 5 | 3 | 4 |
| 1 | 5   | 5 | 1 | 5 | 4   | 1 | 1 | 4 |
| 2 | 1   | 3 | 3 | 3 | 3   | 3 | 3 | 3 |
| 2 | 3   | 4 | 1 | 4 | 3   | 4 | 1 | 4 |
| 1 | 3   | 5 | 5 | 3 | 1   | 1 | 3 | 3 |
| 2 | 2   | 5 | 4 | 4 | 3   | 1 | 1 | 4 |
| 2 | 3   | 4 | 5 | 4 | 2   | 2 | 1 | 4 |
| 1 | 5   | 4 | 4 | 5 | 1   | 1 | 1 | 2 |
| 3 | 1   | 4 | 5 | 3 | 999 | 4 | 2 | 3 |
| 1 | 2   | 5 | 2 | 4 | 3   | 3 | 2 | 5 |
| 2 | 2   | 5 | 3 | 2 | 5   | 4 | 3 | 3 |
| 1 | 4   | 3 | 5 | 3 | 2   | 1 | 1 | 5 |
| 1 | 2   | 5 | 1 | 2 | 1   | 1 | 5 | 3 |
| 1 | 4   | 5 | 5 | 5 | 1   | 1 | 1 | 5 |
| 2 | 1   | 5 | 5 | 5 | 2   | 1 | 1 | 2 |
| 2 | 4   | 4 | 3 | 4 | 3   | 2 | 2 | 5 |
| 2 | 4   | 5 | 3 | 4 | 2   | 2 | 1 | 4 |
| 3 | 4   | 5 | 4 | 4 | 4   | 4 | 2 | 5 |
| 4 | 3   | 4 | 4 | 4 | 4   | 4 | 1 | 3 |
| 2 | 2   | 3 | 5 | 3 | 3   | 1 | 3 | 4 |
| 3 | 3   | 3 | 5 | 4 | 2   | 2 | 1 | 3 |
| 4 | 2   | 5 | 4 | 2 | 5   | 5 | 4 | 5 |
| 3 | 4   | 5 | 2 | 4 | 1   | 5 | 1 | 5 |
| 4 | 2   | 4 | 2 | 4 | 4   | 4 | 2 | 4 |
| 1 | 4   | 5 | 1 | 4 | 1   | 4 | 1 | 4 |
| 3 | 4   | 5 | 3 | 4 | 2   | 1 | 1 | 5 |
| 1 | 4   | 5 | 3 | 4 | 3   | 4 | 1 | 5 |
| 1 | 3   | 4 | 1 | 4 | 3   | 4 | 1 | 5 |
| 5 | 5   | 5 | 3 | 5 | 5   | 1 | 1 | 3 |
| 2 | 5   | 5 | 5 | 4 | 3   | 1 | 1 | 4 |
| 1 | 4   | 5 | 3 | 5 | 2   | 2 | 1 | 4 |
| 1 | 2   | 4 | 5 | 3 | 3   | 2 | 1 | 4 |
| 3 | 2   | 3 | 3 | 3 | 2   | 3 | 1 | 3 |
| 3 | 2   | 4 | 5 | 3 | 2   | 1 | 2 | 3 |
| 3 | 1   | 5 | 3 | 4 | 4   | 2 | 2 | 2 |
| 1 | 3   | 4 | 5 | 5 | 2   | 2 | 1 | 4 |
| 2 | 3   | 2 | 1 | 4 | 2   | 1 | 2 | 2 |
| 3 | 3   | 4 | 4 | 3 | 3   | 2 | 1 | 4 |
| 3 | 4   | 5 | 5 | 5 | 4   | 2 | 2 | 4 |
| 2 | 3   | 4 | 5 | 5 | 3   | 4 | 2 | 3 |
| 1 | 1   | 4 | 1 | 4 | 4   | 4 | 1 | 3 |
| 3 | 4   | 5 | 2 | 4 | 2   | 1 | 1 | 4 |
| 4 | 4   | 5 | 4 | 3 | 4   | 1 | 1 | 4 |
| 2 | 3   | 1 | 2 | 4 | 2   | 2 | 1 | 4 |
| 4 | 5   | 4 | 5 | 2 | 3   | 4 | 3 | 5 |
| 2 | 1   | 3 | 5 | 3 | 5   | 5 | 5 | 3 |
| 2 | 4   | 5 | 3 | 4 | 4   | 1 | 1 | 4 |
| 2 | 3   | 5 | 1 | 4 | 1   | 2 | 1 | 4 |

|   |   |   |   |   |   |     |   |   |
|---|---|---|---|---|---|-----|---|---|
| 1 | 4 | 4 | 5 | 4 | 2 | 2   | 1 | 2 |
| 2 | 1 | 4 | 3 | 4 | 2 | 5   | 2 | 5 |
| 2 | 4 | 5 | 1 | 4 | 4 | 1   | 1 | 4 |
| 2 | 2 | 4 | 4 | 4 | 3 | 4   | 2 | 4 |
| 3 | 4 | 3 | 4 | 3 | 3 | 3   | 3 | 3 |
| 1 | 2 | 5 | 5 | 5 | 1 | 5   | 3 | 5 |
| 1 | 2 | 1 | 2 | 1 | 2 | 4   | 4 | 3 |
| 2 | 1 | 5 | 5 | 3 | 1 | 1   | 1 | 5 |
| 2 | 5 | 4 | 5 | 4 | 1 | 1   | 2 | 5 |
| 1 | 4 | 5 | 4 | 3 | 1 | 2   | 1 | 5 |
| 1 | 3 | 5 | 1 | 5 | 1 | 3   | 1 | 3 |
| 2 | 5 | 5 | 1 | 4 | 2 | 1   | 1 | 4 |
| 2 | 2 | 3 | 3 | 3 | 3 | 4   | 3 | 2 |
| 3 | 2 | 4 | 2 | 3 | 2 | 3   | 1 | 2 |
| 1 | 4 | 5 | 5 | 5 | 1 | 1   | 1 | 5 |
| 4 | 3 | 5 | 2 | 4 | 2 | 2   | 3 | 5 |
| 1 | 4 | 5 | 3 | 3 | 4 | 3   | 1 | 4 |
| 1 | 2 | 5 | 2 | 4 | 2 | 2   | 1 | 1 |
| 1 | 5 | 4 | 4 | 3 | 3 | 5   | 1 | 3 |
| 1 | 2 | 3 | 3 | 3 | 3 | 3   | 3 | 5 |
| 1 | 1 | 5 | 1 | 1 | 1 | 2   | 1 | 5 |
| 3 | 2 | 4 | 4 | 4 | 3 | 3   | 2 | 3 |
| 2 | 2 | 4 | 4 | 3 | 2 | 3   | 4 | 1 |
| 2 | 2 | 4 | 3 | 4 | 2 | 2   | 3 | 4 |
| 1 | 5 | 5 | 4 | 4 | 4 | 1   | 1 | 5 |
| 2 | 2 | 3 | 5 | 3 | 3 | 3   | 1 | 4 |
| 3 | 2 | 4 | 3 | 4 | 2 | 1   | 2 | 3 |
| 2 | 4 | 5 | 4 | 4 | 2 | 2   | 1 | 4 |
| 2 | 3 | 5 | 3 | 4 | 3 | 2   | 1 | 3 |
| 2 | 4 | 5 | 5 | 4 | 2 | 1   | 1 | 4 |
| 1 | 4 | 5 | 1 | 5 | 1 | 1   | 1 | 5 |
| 2 | 3 | 4 | 3 | 2 | 3 | 2   | 1 | 2 |
| 3 | 2 | 4 | 3 | 3 | 2 | 3   | 2 | 3 |
| 4 | 4 | 5 | 1 | 5 | 4 | 1   | 1 | 5 |
| 1 | 5 | 5 | 5 | 5 | 1 | 1   | 1 | 5 |
| 1 | 4 | 5 | 5 | 4 | 2 | 3   | 1 | 4 |
| 1 | 4 | 5 | 5 | 4 | 1 | 1   | 1 | 5 |
| 2 | 3 | 4 | 2 | 4 | 4 | 1   | 1 | 4 |
| 2 | 1 | 4 | 1 | 3 | 2 | 2   | 2 | 4 |
| 3 | 4 | 5 | 1 | 3 | 1 | 1   | 3 | 5 |
| 2 | 3 | 5 | 5 | 5 | 5 | 4   | 3 | 4 |
| 1 | 2 | 4 | 1 | 4 | 4 | 5   | 1 | 4 |
| 2 | 4 | 4 | 5 | 2 | 4 | 2   | 1 | 4 |
| 2 | 2 | 5 | 1 | 4 | 2 | 999 | 1 | 5 |
| 1 | 4 | 4 | 2 | 3 | 3 | 3   | 3 | 3 |
| 2 | 4 | 2 | 3 | 2 | 3 | 2   | 3 | 2 |
| 2 | 5 | 5 | 4 | 4 | 3 | 3   | 4 | 4 |
| 1 | 3 | 4 | 5 | 2 | 3 | 4   | 2 | 3 |
| 2 | 4 | 3 | 2 | 3 | 2 | 2   | 1 | 4 |
| 2 | 5 | 5 | 5 | 4 | 3 | 2   | 1 | 3 |

|   |   |   |   |   |   |     |     |     |
|---|---|---|---|---|---|-----|-----|-----|
| 5 | 4 | 4 | 2 | 3 | 1 | 2   | 3   | 3   |
| 3 | 4 | 4 | 3 | 3 | 5 | 3   | 1   | 3   |
| 3 | 2 | 5 | 2 | 3 | 3 | 2   | 1   | 2   |
| 2 | 2 | 4 | 1 | 5 | 3 | 3   | 3   | 5   |
| 2 | 2 | 4 | 2 | 3 | 3 | 2   | 1   | 4   |
| 4 | 4 | 4 | 4 | 4 | 4 | 4   | 4   | 3   |
| 5 | 4 | 4 | 3 | 4 | 3 | 1   | 5   | 4   |
| 3 | 3 | 4 | 4 | 3 | 3 | 2   | 2   | 2   |
| 4 | 3 | 5 | 5 | 4 | 4 | 1   | 1   | 3   |
| 1 | 3 | 4 | 1 | 2 | 3 | 2   | 1   | 3   |
| 1 | 2 | 5 | 4 | 4 | 4 | 2   | 1   | 2   |
| 4 | 3 | 5 | 5 | 4 | 1 | 3   | 1   | 5   |
| 3 | 4 | 4 | 5 | 3 | 3 | 3   | 2   | 4   |
| 3 | 2 | 4 | 5 | 5 | 1 | 3   | 1   | 4   |
| 2 | 2 | 3 | 4 | 3 | 4 | 3   | 1   | 4   |
| 3 | 2 | 4 | 3 | 3 | 2 | 4   | 4   | 3   |
| 1 | 2 | 5 | 5 | 4 | 2 | 2   | 1   | 4   |
| 3 | 3 | 5 | 5 | 4 | 3 | 3   | 1   | 3   |
| 3 | 2 | 4 | 5 | 4 | 3 | 4   | 2   | 3   |
| 1 | 5 | 4 | 2 | 5 | 1 | 2   | 3   | 5   |
| 1 | 5 | 5 | 5 | 5 | 1 | 1   | 1   | 4   |
| 1 | 5 | 5 | 5 | 5 | 1 | 2   | 1   | 5   |
| 1 | 2 | 4 | 1 | 2 | 3 | 1   | 1   | 2   |
| 1 | 4 | 5 | 4 | 4 | 3 | 1   | 1   | 3   |
| 2 | 4 | 4 | 3 | 4 | 2 | 2   | 1   | 4   |
| 4 | 3 | 5 | 2 | 4 | 2 | 1   | 1   | 2   |
| 2 | 2 | 4 | 1 | 4 | 4 | 3   | 1   | 4   |
| 4 | 2 | 3 | 3 | 2 | 1 | 999 | 999 | 2   |
| 2 | 4 | 5 | 3 | 4 | 2 | 1   | 1   | 3   |
| 4 | 2 | 4 | 4 | 4 | 2 | 2   | 3   | 3   |
| 1 | 4 | 4 | 3 | 4 | 5 | 2   | 2   | 4   |
| 2 | 2 | 4 | 3 | 3 | 2 | 4   | 1   | 3   |
| 2 | 3 | 4 | 4 | 3 | 2 | 3   | 2   | 999 |
| 2 | 3 | 5 | 4 | 2 | 2 | 2   | 1   | 2   |
| 4 | 2 | 5 | 3 | 3 | 4 | 5   | 1   | 2   |
| 2 | 2 | 4 | 3 | 4 | 3 | 2   | 2   | 4   |
| 5 | 1 | 2 | 3 | 2 | 2 | 1   | 2   | 2   |
| 3 | 2 | 4 | 1 | 3 | 2 | 3   | 2   | 2   |
| 4 | 2 | 5 | 3 | 3 | 3 | 3   | 2   | 3   |
| 1 | 4 | 4 | 2 | 3 | 1 | 1   | 1   | 2   |
| 2 | 3 | 4 | 1 | 3 | 3 | 2   | 2   | 5   |
| 3 | 5 | 5 | 4 | 4 | 4 | 3   | 3   | 4   |
| 2 | 1 | 4 | 3 | 2 | 4 | 5   | 5   | 3   |
| 2 | 4 | 4 | 1 | 2 | 3 | 2   | 4   | 3   |
| 4 | 4 | 5 | 5 | 3 | 2 | 1   | 1   | 5   |
| 4 | 3 | 5 | 1 | 3 | 2 | 2   | 1   | 5   |
| 3 | 1 | 5 | 3 | 5 | 1 | 5   | 1   | 5   |
| 3 | 2 | 4 | 5 | 3 | 2 | 2   | 2   | 3   |
| 4 | 3 | 4 | 1 | 4 | 2 | 2   | 1   | 4   |
| 1 | 4 | 3 | 4 | 5 | 2 | 3   | 4   | 3   |

|   |   |   |   |     |   |   |   |   |
|---|---|---|---|-----|---|---|---|---|
| 3 | 4 | 4 | 5 | 3   | 2 | 3 | 2 | 3 |
| 2 | 4 | 5 | 5 | 4   | 3 | 1 | 2 | 4 |
| 2 | 2 | 4 | 5 | 4   | 2 | 1 | 2 | 3 |
| 4 | 3 | 5 | 2 | 3   | 2 | 2 | 4 | 4 |
| 2 | 1 | 5 | 3 | 4   | 2 | 2 | 2 | 4 |
| 3 | 4 | 5 | 1 | 5   | 2 | 3 | 3 | 4 |
| 1 | 4 | 5 | 4 | 4   | 3 | 2 | 4 | 5 |
| 1 | 1 | 5 | 4 | 5   | 1 | 5 | 1 | 2 |
| 4 | 5 | 5 | 5 | 5   | 1 | 1 | 1 | 5 |
| 4 | 2 | 5 | 1 | 4   | 2 | 1 | 1 | 5 |
| 3 | 1 | 3 | 2 | 3   | 4 | 2 | 3 | 2 |
| 3 | 2 | 3 | 4 | 2   | 2 | 2 | 1 | 2 |
| 2 | 3 | 4 | 3 | 2   | 3 | 4 | 2 | 2 |
| 3 | 3 | 5 | 3 | 4   | 3 | 3 | 1 | 3 |
| 2 | 4 | 4 | 1 | 4   | 2 | 1 | 1 | 2 |
| 3 | 2 | 4 | 2 | 2   | 2 | 3 | 1 | 4 |
| 3 | 2 | 3 | 1 | 2   | 3 | 4 | 1 | 3 |
| 4 | 3 | 4 | 2 | 4   | 3 | 4 | 2 | 4 |
| 3 | 3 | 4 | 2 | 3   | 4 | 2 | 2 | 3 |
| 3 | 3 | 4 | 3 | 3   | 2 | 3 | 3 | 3 |
| 2 | 4 | 4 | 3 | 5   | 2 | 1 | 1 | 4 |
| 2 | 3 | 5 | 3 | 4   | 1 | 2 | 3 | 4 |
| 3 | 3 | 4 | 3 | 4   | 2 | 3 | 2 | 4 |
| 3 | 2 | 4 | 1 | 3   | 3 | 3 | 2 | 3 |
| 5 | 4 | 4 | 2 | 2   | 1 | 5 | 4 | 4 |
| 4 | 1 | 4 | 3 | 4   | 3 | 5 | 3 | 4 |
| 5 | 5 | 4 | 1 | 2   | 1 | 4 | 2 | 4 |
| 1 | 3 | 4 | 3 | 4   | 4 | 4 | 1 | 4 |
| 2 | 4 | 5 | 5 | 5   | 3 | 2 | 2 | 4 |
| 1 | 2 | 5 | 1 | 5   | 5 | 2 | 1 | 4 |
| 2 | 4 | 5 | 3 | 4   | 3 | 1 | 1 | 4 |
| 3 | 3 | 5 | 4 | 4   | 3 | 3 | 2 | 4 |
| 2 | 3 | 5 | 3 | 3   | 2 | 2 | 1 | 4 |
| 2 | 3 | 4 | 1 | 3   | 3 | 4 | 1 | 4 |
| 2 | 4 | 5 | 1 | 4   | 2 | 3 | 2 | 4 |
| 2 | 3 | 3 | 4 | 4   | 2 | 3 | 1 | 5 |
| 3 | 2 | 5 | 4 | 1   | 2 | 4 | 1 | 3 |
| 3 | 3 | 4 | 4 | 4   | 2 | 4 | 2 | 4 |
| 5 | 4 | 5 | 1 | 5   | 2 | 2 | 1 | 4 |
| 1 | 4 | 4 | 5 | 3   | 3 | 2 | 1 | 4 |
| 1 | 4 | 4 | 1 | 5   | 2 | 2 | 1 | 5 |
| 2 | 4 | 3 | 4 | 999 | 2 | 2 | 1 | 5 |
| 3 | 3 | 4 | 5 | 2   | 2 | 3 | 1 | 5 |
| 2 | 1 | 5 | 3 | 4   | 3 | 3 | 1 | 3 |
| 2 | 2 | 3 | 1 | 3   | 3 | 3 | 3 | 3 |
| 4 | 3 | 5 | 3 | 4   | 1 | 3 | 1 | 5 |
| 5 | 3 | 4 | 1 | 4   | 1 | 2 | 1 | 2 |
| 1 | 2 | 2 | 5 | 4   | 2 | 2 | 1 | 2 |
| 2 | 3 | 5 | 1 | 4   | 2 | 3 | 1 | 5 |
| 4 | 5 | 3 | 2 | 3   | 4 | 4 | 2 | 1 |

|     |     |     |     |     |     |     |     |     |
|-----|-----|-----|-----|-----|-----|-----|-----|-----|
| 4   | 4   | 4   | 4   | 3   | 3   | 2   | 2   | 4   |
| 3   | 2   | 4   | 1   | 4   | 1   | 5   | 1   | 4   |
| 4   | 1   | 5   | 3   | 4   | 2   | 5   | 5   | 4   |
| 1   | 5   | 5   | 4   | 5   | 1   | 1   | 1   | 5   |
| 5   | 2   | 5   | 1   | 3   | 2   | 5   | 1   | 4   |
| 2   | 4   | 5   | 5   | 5   | 2   | 2   | 1   | 4   |
| 1   | 4   | 5   | 2   | 999 | 3   | 3   | 1   | 5   |
| 1   | 4   | 2   | 3   | 2   | 2   | 2   | 1   | 3   |
| 4   | 4   | 1   | 4   | 4   | 1   | 1   | 1   | 5   |
| 4   | 4   | 4   | 3   | 3   | 2   | 4   | 1   | 4   |
| 3   | 2   | 4   | 5   | 3   | 4   | 4   | 2   | 4   |
| 2   | 4   | 3   | 4   | 2   | 2   | 5   | 1   | 4   |
| 3   | 4   | 4   | 2   | 3   | 3   | 1   | 1   | 4   |
| 5   | 4   | 5   | 5   | 5   | 3   | 4   | 1   | 5   |
| 4   | 4   | 4   | 3   | 3   | 2   | 4   | 2   | 3   |
| 1   | 2   | 5   | 5   | 2   | 5   | 5   | 5   | 5   |
| 3   | 4   | 4   | 4   | 4   | 3   | 3   | 2   | 3   |
| 4   | 4   | 4   | 5   | 3   | 3   | 2   | 1   | 4   |
| 2   | 4   | 5   | 5   | 5   | 2   | 5   | 5   | 5   |
| 2   | 3   | 4   | 4   | 3   | 3   | 2   | 1   | 2   |
| 3   | 1   | 5   | 1   | 3   | 2   | 5   | 3   | 4   |
| 2   | 4   | 3   | 2   | 4   | 2   | 3   | 1   | 4   |
| 3   | 3   | 5   | 5   | 3   | 3   | 4   | 1   | 3   |
| 4   | 2   | 5   | 3   | 5   | 1   | 3   | 1   | 4   |
| 2   | 2   | 4   | 1   | 3   | 2   | 4   | 2   | 3   |
| 3   | 3   | 4   | 3   | 2   | 3   | 1   | 2   | 4   |
| 999 | 999 | 999 | 999 | 999 | 999 | 999 | 999 | 999 |
| 3   | 4   | 5   | 1   | 4   | 5   | 2   | 1   | 4   |
| 4   | 3   | 4   | 2   | 4   | 3   | 3   | 1   | 3   |
| 2   | 2   | 4   | 1   | 4   | 2   | 3   | 1   | 5   |
| 2   | 2   | 5   | 4   | 4   | 5   | 2   | 1   | 4   |
| 2   | 3   | 5   | 1   | 4   | 3   | 1   | 4   | 5   |
| 2   | 3   | 4   | 5   | 4   | 1   | 2   | 1   | 3   |
| 1   | 2   | 2   | 1   | 3   | 2   | 1   | 2   | 1   |
| 2   | 3   | 4   | 1   | 4   | 3   | 3   | 2   | 3   |
| 3   | 2   | 4   | 3   | 2   | 3   | 3   | 3   | 2   |
| 1   | 5   | 5   | 1   | 5   | 1   | 999 | 1   | 5   |
| 3   | 2   | 2   | 1   | 3   | 3   | 5   | 4   | 2   |
| 2   | 3   | 5   | 5   | 4   | 3   | 5   | 1   | 4   |
| 2   | 3   | 4   | 999 | 999 | 3   | 2   | 1   | 4   |
| 2   | 3   | 4   | 4   | 4   | 2   | 4   | 3   | 4   |
| 2   | 3   | 4   | 4   | 4   | 2   | 1   | 1   | 4   |
| 2   | 2   | 5   | 2   | 4   | 1   | 4   | 1   | 5   |
| 2   | 2   | 2   | 3   | 3   | 4   | 4   | 3   | 2   |
| 3   | 4   | 2   | 3   | 4   | 2   | 3   | 4   | 3   |
| 2   | 4   | 4   | 4   | 4   | 4   | 3   | 1   | 4   |
| 1   | 4   | 5   | 5   | 5   | 2   | 2   | 1   | 5   |
| 5   | 4   | 3   | 5   | 4   | 3   | 2   | 3   | 5   |
| 3   | 3   | 2   | 2   | 2   | 2   | 3   | 3   | 3   |
| 2   | 2   | 4   | 5   | 4   | 4   | 1   | 1   | 5   |

|   |   |   |   |   |   |   |     |   |
|---|---|---|---|---|---|---|-----|---|
| 3 | 3 | 5 | 1 | 4 | 1 | 1 | 2   | 4 |
| 3 | 2 | 3 | 1 | 4 | 2 | 4 | 2   | 4 |
| 3 | 3 | 4 | 2 | 3 | 2 | 1 | 2   | 5 |
| 2 | 3 | 4 | 3 | 4 | 3 | 2 | 2   | 4 |
| 1 | 2 | 5 | 2 | 2 | 2 | 2 | 1   | 4 |
| 1 | 5 | 5 | 1 | 5 | 1 | 1 | 1   | 5 |
| 1 | 2 | 4 | 2 | 1 | 2 | 3 | 2   | 2 |
| 4 | 4 | 4 | 5 | 3 | 4 | 1 | 2   | 4 |
| 3 | 3 | 4 | 2 | 3 | 1 | 3 | 999 | 3 |
| 3 | 3 | 5 | 3 | 5 | 1 | 4 | 1   | 5 |
| 1 | 4 | 5 | 1 | 4 | 3 | 2 | 1   | 5 |
| 3 | 3 | 4 | 5 | 3 | 2 | 2 | 1   | 4 |
| 3 | 4 | 5 | 1 | 3 | 4 | 1 | 1   | 2 |
| 1 | 4 | 4 | 3 | 4 | 2 | 2 | 2   | 4 |
| 3 | 3 | 5 | 4 | 3 | 2 | 3 | 2   | 5 |
| 2 | 4 | 4 | 5 | 4 | 5 | 2 | 1   | 4 |

| BES10 | BES11 | BES12 | BES13 | BES14 | BES15 | BES16 | BES17 | BES18 |
|-------|-------|-------|-------|-------|-------|-------|-------|-------|
| 5     | 3     | 5     | 1     | 5     | 4     | 5     | 5     | 1     |
| 5     | 3     | 4     | 3     | 5     | 1     | 4     | 3     | 1     |
| 4     | 5     | 4     | 1     | 5     | 4     | 5     | 3     | 1     |
| 5     | 3     | 4     | 1     | 4     | 4     | 5     | 5     | 1     |
| 4     | 5     | 3     | 3     | 5     | 2     | 5     | 1     | 1     |
| 3     | 5     | 5     | 2     | 5     | 2     | 4     | 4     | 2     |
| 999   | 999   | 999   | 999   | 999   | 999   | 999   | 999   | 999   |
| 4     | 5     | 5     | 1     | 5     | 5     | 5     | 5     | 1     |
| 3     | 3     | 1     | 4     | 2     | 4     | 5     | 4     | 1     |
| 5     | 5     | 5     | 1     | 5     | 4     | 5     | 5     | 1     |
| 3     | 5     | 1     | 2     | 5     | 1     | 5     | 2     | 1     |
| 4     | 1     | 4     | 2     | 4     | 3     | 4     | 3     | 1     |
| 999   | 4     | 2     | 4     | 4     | 2     | 3     | 3     | 3     |
| 4     | 999   | 1     | 3     | 3     | 4     | 3     | 2     | 2     |
| 3     | 4     | 3     | 1     | 5     | 4     | 5     | 4     | 1     |
| 4     | 3     | 4     | 3     | 4     | 3     | 4     | 2     | 3     |
| 3     | 5     | 3     | 2     | 4     | 3     | 4     | 3     | 1     |
| 4     | 3     | 4     | 2     | 4     | 3     | 5     | 3     | 1     |
| 2     | 1     | 2     | 2     | 3     | 4     | 5     | 4     | 3     |
| 999   | 999   | 999   | 999   | 999   | 999   | 999   | 999   | 999   |
| 5     | 1     | 4     | 1     | 5     | 5     | 999   | 4     | 1     |
| 2     | 3     | 5     | 4     | 5     | 1     | 5     | 3     | 1     |
| 3     | 2     | 4     | 2     | 5     | 3     | 5     | 3     | 1     |
| 2     | 5     | 3     | 3     | 4     | 4     | 3     | 3     | 3     |
| 2     | 5     | 4     | 3     | 4     | 3     | 5     | 3     | 1     |
| 4     | 5     | 4     | 3     | 4     | 3     | 3     | 2     | 1     |
| 4     | 5     | 3     | 2     | 3     | 3     | 3     | 4     | 1     |
| 5     | 5     | 5     | 2     | 5     | 3     | 5     | 4     | 1     |
| 2     | 1     | 2     | 2     | 4     | 1     | 5     | 4     | 1     |
| 4     | 5     | 4     | 2     | 4     | 4     | 5     | 5     | 2     |
| 5     | 4     | 5     | 5     | 5     | 3     | 5     | 1     | 1     |
| 999   | 5     | 3     | 3     | 4     | 3     | 4     | 3     | 3     |
| 3     | 2     | 3     | 2     | 3     | 2     | 3     | 3     | 2     |
| 4     | 4     | 3     | 1     | 4     | 2     | 4     | 2     | 2     |
| 4     | 4     | 3     | 2     | 5     | 4     | 3     | 4     | 2     |
| 3     | 3     | 3     | 5     | 4     | 3     | 3     | 3     | 4     |
| 3     | 5     | 4     | 4     | 4     | 3     | 4     | 3     | 1     |
| 5     | 5     | 5     | 5     | 5     | 4     | 5     | 1     | 4     |
| 4     | 4     | 4     | 3     | 4     | 2     | 4     | 4     | 3     |
| 2     | 5     | 4     | 2     | 4     | 1     | 5     | 4     | 1     |
| 999   | 999   | 999   | 999   | 999   | 999   | 999   | 999   | 999   |
| 999   | 999   | 999   | 999   | 999   | 999   | 999   | 999   | 999   |
| 4     | 3     | 4     | 3     | 4     | 2     | 4     | 3     | 4     |
| 3     | 5     | 3     | 2     | 3     | 1     | 3     | 2     | 1     |
| 999   | 999   | 999   | 999   | 999   | 999   | 999   | 999   | 999   |
| 2     | 5     | 4     | 2     | 3     | 4     | 3     | 3     | 1     |
| 4     | 4     | 3     | 1     | 5     | 4     | 3     | 1     | 4     |
| 2     | 4     | 4     | 3     | 4     | 2     | 4     | 3     | 2     |
| 3     | 5     | 3     | 3     | 999   | 3     | 4     | 2     | 1     |



|     |     |     |     |     |     |     |     |     |
|-----|-----|-----|-----|-----|-----|-----|-----|-----|
| 2   | 5   | 5   | 4   | 5   | 3   | 4   | 5   | 3   |
| 5   | 2   | 2   | 3   | 5   | 3   | 4   | 4   | 1   |
| 5   | 1   | 5   | 4   | 5   | 2   | 5   | 3   | 4   |
| 4   | 5   | 4   | 1   | 4   | 1   | 5   | 1   | 2   |
| 5   | 5   | 5   | 1   | 5   | 5   | 5   | 1   | 1   |
| 5   | 5   | 5   | 1   | 5   | 5   | 5   | 2   | 5   |
| 5   | 4   | 5   | 1   | 5   | 4   | 5   | 3   | 1   |
| 5   | 5   | 5   | 1   | 5   | 5   | 5   | 3   | 3   |
| 4   | 3   | 3   | 4   | 4   | 3   | 4   | 3   | 1   |
| 2   | 4   | 4   | 5   | 4   | 2   | 4   | 2   | 2   |
| 3   | 5   | 3   | 1   | 5   | 1   | 5   | 4   | 1   |
| 2   | 5   | 2   | 4   | 5   | 3   | 4   | 4   | 1   |
| 2   | 5   | 1   | 1   | 5   | 1   | 1   | 1   | 1   |
| 4   | 4   | 3   | 3   | 4   | 4   | 4   | 4   | 2   |
| 5   | 4   | 4   | 2   | 5   | 4   | 5   | 2   | 1   |
| 3   | 3   | 3   | 3   | 4   | 2   | 4   | 3   | 1   |
| 4   | 2   | 4   | 2   | 4   | 3   | 4   | 3   | 3   |
| 3   | 4   | 4   | 3   | 4   | 3   | 4   | 3   | 1   |
| 999 | 999 | 999 | 999 | 999 | 999 | 999 | 999 | 999 |
| 999 | 999 | 999 | 999 | 999 | 999 | 999 | 999 | 999 |
| 4   | 4   | 4   | 2   | 5   | 3   | 4   | 1   | 1   |
| 4   | 4   | 5   | 1   | 5   | 5   | 5   | 3   | 1   |
| 999 | 999 | 999 | 999 | 999 | 999 | 999 | 999 | 999 |
| 3   | 3   | 3   | 3   | 3   | 5   | 3   | 3   | 3   |
| 999 | 999 | 999 | 999 | 999 | 999 | 999 | 999 | 999 |
| 999 | 999 | 999 | 999 | 999 | 999 | 999 | 999 | 999 |
| 999 | 999 | 999 | 999 | 999 | 999 | 999 | 999 | 999 |
| 3   | 1   | 3   | 2   | 2   | 1   | 4   | 3   | 2   |
| 5   | 5   | 5   | 1   | 4   | 4   | 4   | 4   | 1   |
| 5   | 5   | 5   | 5   | 5   | 1   | 5   | 5   | 5   |
| 3   | 4   | 3   | 2   | 5   | 2   | 4   | 4   | 1   |
| 2   | 1   | 3   | 1   | 5   | 1   | 5   | 4   | 1   |
| 5   | 3   | 4   | 1   | 5   | 3   | 5   | 4   | 1   |
| 3   | 3   | 1   | 1   | 999 | 999 | 3   | 1   | 1   |
| 4   | 4   | 4   | 3   | 5   | 2   | 5   | 4   | 2   |
| 5   | 4   | 5   | 3   | 5   | 5   | 5   | 5   | 1   |
| 2   | 4   | 3   | 4   | 3   | 4   | 3   | 1   | 3   |
| 3   | 4   | 3   | 3   | 4   | 2   | 999 | 2   | 1   |
| 3   | 4   | 3   | 3   | 4   | 2   | 4   | 2   | 2   |
| 2   | 5   | 4   | 3   | 4   | 1   | 4   | 2   | 5   |
| 4   | 5   | 3   | 2   | 4   | 3   | 5   | 4   | 1   |
| 4   | 4   | 5   | 5   | 5   | 1   | 3   | 3   | 4   |
| 5   | 5   | 3   | 2   | 5   | 4   | 3   | 5   | 1   |
| 999 | 3   | 3   | 3   | 4   | 2   | 3   | 2   | 1   |
| 2   | 1   | 3   | 2   | 5   | 1   | 4   | 1   | 3   |
| 3   | 5   | 3   | 2   | 4   | 2   | 4   | 3   | 2   |
| 4   | 4   | 4   | 1   | 4   | 3   | 5   | 3   | 1   |
| 3   | 1   | 2   | 1   | 3   | 3   | 3   | 2   | 2   |
| 3   | 5   | 3   | 1   | 4   | 3   | 3   | 2   | 1   |
| 4   | 5   | 3   | 3   | 4   | 4   | 4   | 3   | 1   |

|   |     |   |     |     |   |   |     |   |
|---|-----|---|-----|-----|---|---|-----|---|
| 2 | 4   | 1 | 5   | 5   | 1 | 5 | 4   | 1 |
| 4 | 4   | 4 | 1   | 4   | 4 | 3 | 1   | 1 |
| 4 | 5   | 4 | 1   | 4   | 4 | 5 | 3   | 2 |
| 4 | 5   | 4 | 1   | 5   | 5 | 5 | 4   | 1 |
| 5 | 4   | 5 | 3   | 5   | 3 | 4 | 3   | 2 |
| 5 | 3   | 5 | 4   | 5   | 3 | 5 | 3   | 4 |
| 4 | 4   | 3 | 4   | 5   | 2 | 4 | 2   | 2 |
| 5 | 5   | 5 | 1   | 5   | 4 | 5 | 5   | 1 |
| 5 | 5   | 2 | 2   | 3   | 3 | 5 | 3   | 2 |
| 5 | 1   | 5 | 5   | 5   | 1 | 5 | 1   | 1 |
| 3 | 4   | 3 | 3   | 4   | 2 | 4 | 2   | 3 |
| 4 | 4   | 4 | 3   | 4   | 3 | 4 | 3   | 1 |
| 1 | 1   | 1 | 1   | 1   | 1 | 5 | 5   | 1 |
| 1 | 1   | 1 | 3   | 1   | 1 | 1 | 1   | 3 |
| 3 | 4   | 5 | 3   | 5   | 3 | 5 | 4   | 2 |
| 5 | 5   | 4 | 5   | 5   | 1 | 4 | 1   | 2 |
| 4 | 4   | 4 | 1   | 4   | 3 | 4 | 4   | 1 |
| 3 | 5   | 1 | 3   | 5   | 1 | 3 | 2   | 1 |
| 5 | 5   | 5 | 1   | 5   | 5 | 5 | 999 | 1 |
| 1 | 2   | 3 | 1   | 3   | 1 | 5 | 2   | 2 |
| 3 | 4   | 3 | 1   | 4   | 2 | 3 | 2   | 1 |
| 4 | 3   | 3 | 4   | 999 | 2 | 3 | 2   | 2 |
| 5 | 4   | 4 | 2   | 5   | 4 | 5 | 4   | 1 |
| 4 | 3   | 4 | 999 | 4   | 3 | 4 | 3   | 3 |
| 2 | 999 | 1 | 2   | 999 | 3 | 4 | 3   | 2 |
| 4 | 3   | 3 | 2   | 4   | 2 | 4 | 2   | 1 |
| 4 | 3   | 4 | 2   | 5   | 2 | 4 | 2   | 2 |
| 4 | 5   | 4 | 1   | 5   | 4 | 4 | 2   | 1 |
| 2 | 2   | 2 | 2   | 4   | 3 | 2 | 3   | 2 |
| 4 | 2   | 3 | 1   | 2   | 1 | 3 | 2   | 3 |
| 4 | 4   | 5 | 1   | 5   | 5 | 5 | 4   | 1 |
| 3 | 4   | 4 | 2   | 5   | 2 | 5 | 3   | 1 |
| 3 | 4   | 5 | 5   | 4   | 2 | 5 | 2   | 2 |
| 2 | 3   | 2 | 3   | 2   | 3 | 2 | 3   | 3 |
| 3 | 4   | 5 | 3   | 2   | 4 | 3 | 2   | 2 |
| 2 | 5   | 3 | 2   | 3   | 2 | 3 | 2   | 3 |
| 3 | 5   | 2 | 3   | 4   | 2 | 5 | 2   | 1 |
| 4 | 3   | 4 | 2   | 4   | 3 | 5 | 5   | 1 |
| 4 | 4   | 5 | 1   | 4   | 3 | 2 | 4   | 1 |
| 3 | 1   | 3 | 4   | 3   | 4 | 4 | 2   | 2 |
| 4 | 3   | 3 | 4   | 4   | 4 | 4 | 3   | 2 |
| 5 | 4   | 5 | 5   | 5   | 1 | 5 | 4   | 1 |
| 3 | 4   | 4 | 4   | 4   | 3 | 4 | 3   | 3 |
| 4 | 3   | 3 | 3   | 4   | 2 | 4 | 2   | 1 |
| 3 | 5   | 3 | 3   | 4   | 2 | 3 | 2   | 3 |
| 3 | 3   | 3 | 3   | 4   | 2 | 4 | 3   | 2 |
| 3 | 4   | 4 | 3   | 5   | 4 | 4 | 5   | 1 |
| 1 | 3   | 4 | 1   | 4   | 5 | 5 | 3   | 1 |
| 3 | 5   | 4 | 2   | 5   | 4 | 4 | 3   | 1 |
| 4 | 4   | 2 | 3   | 3   | 2 | 4 | 4   | 1 |

|   |   |   |   |     |     |     |     |   |
|---|---|---|---|-----|-----|-----|-----|---|
| 4 | 4 | 3 | 3 | 5   | 4   | 4   | 3   | 3 |
| 4 | 4 | 3 | 2 | 4   | 4   | 3   | 2   | 1 |
| 4 | 2 | 4 | 1 | 5   | 1   | 5   | 2   | 1 |
| 2 | 1 | 1 | 5 | 5   | 2   | 5   | 5   | 1 |
| 1 | 3 | 4 | 2 | 4   | 4   | 5   | 3   | 1 |
| 4 | 5 | 4 | 1 | 5   | 3   | 5   | 3   | 1 |
| 4 | 3 | 4 | 2 | 5   | 2   | 4   | 2   | 1 |
| 5 | 3 | 5 | 1 | 5   | 4   | 5   | 3   | 5 |
| 2 | 3 | 5 | 2 | 4   | 2   | 5   | 1   | 1 |
| 5 | 3 | 3 | 1 | 3   | 2   | 4   | 3   | 2 |
| 3 | 5 | 4 | 2 | 5   | 3   | 3   | 2   | 1 |
| 1 | 5 | 4 | 3 | 5   | 4   | 4   | 3   | 1 |
| 1 | 5 | 1 | 2 | 1   | 5   | 5   | 1   | 4 |
| 3 | 4 | 3 | 2 | 3   | 3   | 3   | 4   | 2 |
| 3 | 2 | 2 | 4 | 4   | 1   | 4   | 3   | 1 |
| 4 | 5 | 3 | 2 | 4   | 3   | 4   | 4   | 1 |
| 5 | 3 | 5 | 4 | 5   | 3   | 5   | 3   | 2 |
| 4 | 5 | 4 | 2 | 5   | 4   | 999 | 1   | 1 |
| 3 | 3 | 4 | 1 | 3   | 3   | 5   | 3   | 1 |
| 4 | 5 | 4 | 2 | 4   | 3   | 4   | 3   | 2 |
| 4 | 5 | 4 | 3 | 4   | 3   | 4   | 4   | 1 |
| 5 | 3 | 5 | 2 | 5   | 2   | 5   | 2   | 1 |
| 5 | 3 | 4 | 2 | 4   | 4   | 5   | 4   | 1 |
| 3 | 5 | 4 | 3 | 5   | 4   | 5   | 3   | 2 |
| 3 | 4 | 5 | 1 | 4   | 2   | 5   | 3   | 1 |
| 3 | 5 | 2 | 1 | 4   | 3   | 3   | 4   | 1 |
| 5 | 3 | 4 | 2 | 5   | 2   | 5   | 3   | 1 |
| 4 | 4 | 3 | 4 | 5   | 4   | 5   | 3   | 1 |
| 4 | 5 | 5 | 2 | 5   | 4   | 5   | 3   | 1 |
| 4 | 5 | 4 | 2 | 4   | 2   | 4   | 2   | 1 |
| 4 | 4 | 3 | 2 | 4   | 4   | 4   | 5   | 1 |
| 3 | 5 | 2 | 4 | 5   | 4   | 5   | 1   | 1 |
| 2 | 1 | 3 | 2 | 4   | 1   | 5   | 4   | 1 |
| 4 | 4 | 3 | 3 | 4   | 4   | 4   | 2   | 2 |
| 5 | 4 | 4 | 1 | 3   | 999 | 3   | 4   | 1 |
| 2 | 5 | 2 | 1 | 3   | 2   | 2   | 3   | 1 |
| 4 | 2 | 4 | 5 | 3   | 2   | 4   | 2   | 1 |
| 2 | 1 | 5 | 3 | 999 | 2   | 4   | 2   | 3 |
| 4 | 3 | 2 | 3 | 5   | 3   | 4   | 999 | 1 |
| 3 | 5 | 5 | 4 | 5   | 5   | 4   | 5   | 5 |
| 4 | 5 | 4 | 4 | 4   | 4   | 5   | 4   | 1 |
| 3 | 3 | 4 | 2 | 4   | 3   | 5   | 4   | 1 |
| 3 | 4 | 3 | 2 | 5   | 3   | 5   | 3   | 1 |
| 4 | 2 | 4 | 2 | 4   | 3   | 5   | 3   | 2 |
| 2 | 3 | 4 | 3 | 3   | 3   | 2   | 1   | 1 |
| 1 | 4 | 2 | 4 | 5   | 4   | 5   | 3   | 1 |
| 4 | 4 | 4 | 2 | 4   | 4   | 4   | 4   | 1 |
| 3 | 4 | 2 | 2 | 3   | 2   | 3   | 1   | 2 |
| 3 | 4 | 3 | 2 | 3   | 2   | 4   | 3   | 1 |
| 4 | 1 | 4 | 3 | 4   | 3   | 5   | 3   | 2 |



|   |     |   |   |   |   |   |     |     |
|---|-----|---|---|---|---|---|-----|-----|
| 4 | 5   | 5 | 3 | 5 | 1 | 5 | 4   | 1   |
| 4 | 3   | 3 | 2 | 4 | 5 | 5 | 4   | 2   |
| 4 | 5   | 4 | 3 | 1 | 4 | 5 | 4   | 5   |
| 3 | 4   | 3 | 2 | 3 | 4 | 4 | 4   | 2   |
| 3 | 2   | 3 | 2 | 3 | 3 | 3 | 3   | 3   |
| 5 | 3   | 4 | 1 | 5 | 4 | 5 | 5   | 1   |
| 2 | 2   | 4 | 3 | 4 | 1 | 4 | 4   | 3   |
| 4 | 3   | 4 | 1 | 5 | 4 | 5 | 3   | 1   |
| 4 | 5   | 4 | 2 | 4 | 4 | 4 | 4   | 4   |
| 3 | 5   | 3 | 3 | 3 | 3 | 4 | 3   | 3   |
| 3 | 1   | 3 | 2 | 4 | 2 | 3 | 4   | 3   |
| 3 | 4   | 3 | 3 | 4 | 3 | 4 | 3   | 1   |
| 4 | 5   | 3 | 2 | 5 | 2 | 5 | 1   | 1   |
| 5 | 4   | 4 | 2 | 5 | 3 | 5 | 4   | 2   |
| 4 | 5   | 5 | 2 | 5 | 3 | 4 | 2   | 1   |
| 4 | 5   | 3 | 2 | 4 | 4 | 5 | 3   | 1   |
| 4 | 5   | 4 | 1 | 4 | 4 | 4 | 3   | 1   |
| 3 | 4   | 4 | 4 | 5 | 4 | 4 | 3   | 1   |
| 4 | 5   | 4 | 4 | 4 | 2 | 4 | 2   | 2   |
| 2 | 4   | 2 | 5 | 4 | 3 | 5 | 4   | 5   |
| 2 | 4   | 3 | 5 | 4 | 4 | 4 | 2   | 2   |
| 4 | 4   | 3 | 2 | 4 | 3 | 4 | 4   | 2   |
| 5 | 3   | 2 | 2 | 5 | 2 | 5 | 4   | 1   |
| 4 | 1   | 4 | 1 | 4 | 1 | 4 | 4   | 1   |
| 5 | 4   | 4 | 5 | 5 | 4 | 5 | 3   | 1   |
| 4 | 3   | 4 | 2 | 4 | 2 | 4 | 3   | 1   |
| 3 | 1   | 3 | 5 | 5 | 3 | 5 | 5   | 1   |
| 5 | 5   | 5 | 2 | 3 | 4 | 3 | 4   | 1   |
| 3 | 5   | 4 | 1 | 4 | 4 | 4 | 3   | 1   |
| 4 | 2   | 5 | 2 | 4 | 2 | 4 | 3   | 1   |
| 3 | 4   | 4 | 2 | 4 | 5 | 3 | 999 | 1   |
| 2 | 3   | 2 | 3 | 2 | 3 | 2 | 3   | 2   |
| 4 | 4   | 3 | 3 | 4 | 3 | 4 | 2   | 1   |
| 4 | 4   | 5 | 3 | 4 | 2 | 5 | 4   | 2   |
| 3 | 4   | 3 | 3 | 4 | 3 | 2 | 2   | 2   |
| 4 | 1   | 3 | 4 | 4 | 1 | 4 | 3   | 1   |
| 4 | 4   | 3 | 2 | 4 | 3 | 4 | 4   | 1   |
| 1 | 999 | 3 | 5 | 1 | 5 | 5 | 1   | 4   |
| 3 | 5   | 3 | 3 | 4 | 2 | 4 | 4   | 1   |
| 3 | 5   | 5 | 1 | 4 | 4 | 4 | 3   | 1   |
| 5 | 5   | 2 | 3 | 4 | 3 | 5 | 4   | 1   |
| 4 | 4   | 4 | 2 | 4 | 4 | 4 | 1   | 1   |
| 4 | 5   | 4 | 1 | 3 | 4 | 3 | 2   | 1   |
| 2 | 4   | 3 | 3 | 4 | 5 | 4 | 3   | 2   |
| 2 | 4   | 2 | 4 | 4 | 4 | 3 | 3   | 999 |
| 4 | 3   | 3 | 2 | 4 | 1 | 4 | 1   | 1   |
| 4 | 2   | 5 | 3 | 5 | 5 | 5 | 4   | 1   |
| 4 | 4   | 4 | 4 | 4 | 3 | 5 | 3   | 2   |
| 5 | 5   | 5 | 4 | 5 | 3 | 5 | 2   | 1   |
| 3 | 4   | 3 | 2 | 3 | 4 | 4 | 2   | 2   |

|   |   |   |     |   |   |     |   |   |
|---|---|---|-----|---|---|-----|---|---|
| 4 | 4 | 5 | 3   | 4 | 4 | 5   | 4 | 1 |
| 3 | 4 | 3 | 3   | 4 | 4 | 5   | 2 | 1 |
| 4 | 3 | 4 | 2   | 4 | 4 | 5   | 5 | 1 |
| 4 | 5 | 4 | 3   | 4 | 3 | 5   | 3 | 2 |
| 5 | 4 | 5 | 999 | 1 | 3 | 999 | 2 | 1 |
| 2 | 1 | 3 | 2   | 1 | 3 | 2   | 3 | 3 |
| 3 | 5 | 4 | 999 | 4 | 5 | 4   | 5 | 1 |
| 5 | 1 | 4 | 3   | 4 | 2 | 4   | 4 | 1 |
| 5 | 3 | 3 | 3   | 5 | 4 | 5   | 4 | 1 |
| 5 | 5 | 5 | 3   | 5 | 1 | 5   | 2 | 1 |
| 3 | 2 | 3 | 4   | 5 | 3 | 4   | 3 | 2 |
| 5 | 3 | 4 | 1   | 5 | 4 | 5   | 3 | 1 |
| 5 | 5 | 5 | 2   | 5 | 3 | 5   | 3 | 1 |
| 4 | 4 | 5 | 4   | 5 | 5 | 5   | 1 | 1 |
| 5 | 5 | 4 | 2   | 5 | 4 | 5   | 4 | 1 |
| 5 | 2 | 4 | 2   | 5 | 1 | 5   | 2 | 1 |
| 5 | 3 | 5 | 3   | 4 | 2 | 5   | 3 | 1 |
| 3 | 4 | 4 | 2   | 4 | 2 | 4   | 2 | 1 |
| 4 | 3 | 4 | 2   | 4 | 3 | 4   | 3 | 3 |
| 5 | 3 | 4 | 2   | 4 | 2 | 4   | 2 | 1 |
| 3 | 5 | 2 | 3   | 4 | 3 | 4   | 3 | 1 |
| 3 | 5 | 4 | 4   | 5 | 5 | 5   | 4 | 1 |
| 4 | 4 | 3 | 3   | 4 | 3 | 4   | 3 | 1 |
| 2 | 3 | 3 | 3   | 3 | 4 | 3   | 3 | 2 |
| 4 | 3 | 3 | 3   | 4 | 3 | 5   | 2 | 4 |
| 4 | 3 | 4 | 2   | 4 | 3 | 4   | 4 | 2 |
| 5 | 5 | 4 | 1   | 5 | 2 | 5   | 5 | 1 |
| 3 | 3 | 2 | 3   | 3 | 1 | 3   | 1 | 2 |
| 4 | 2 | 4 | 3   | 4 | 3 | 4   | 3 | 2 |
| 4 | 3 | 3 | 3   | 4 | 3 | 5   | 4 | 2 |
| 3 | 1 | 3 | 2   | 4 | 3 | 4   | 3 | 1 |
| 3 | 5 | 3 | 2   | 4 | 4 | 3   | 3 | 1 |
| 4 | 4 | 4 | 3   | 4 | 3 | 5   | 4 | 1 |
| 4 | 3 | 4 | 2   | 4 | 3 | 3   | 3 | 3 |
| 5 | 1 | 4 | 2   | 4 | 4 | 5   | 4 | 1 |
| 3 | 4 | 4 | 3   | 4 | 3 | 4   | 3 | 1 |
| 4 | 4 | 2 | 2   | 3 | 3 | 3   | 4 | 2 |
| 3 | 3 | 5 | 4   | 3 | 5 | 2   | 3 | 4 |
| 3 | 3 | 3 | 3   | 3 | 2 | 3   | 3 | 3 |
| 5 | 5 | 5 | 4   | 5 | 5 | 5   | 4 | 1 |
| 4 | 5 | 4 | 3   | 5 | 3 | 4   | 3 | 1 |
| 4 | 3 | 4 | 1   | 4 | 2 | 4   | 1 | 1 |
| 4 | 4 | 4 | 2   | 4 | 3 | 4   | 4 | 1 |
| 4 | 1 | 3 | 5   | 5 | 1 | 4   | 1 | 1 |
| 5 | 4 | 4 | 2   | 5 | 5 | 4   | 4 | 2 |
| 4 | 1 | 4 | 3   | 4 | 3 | 5   | 2 | 2 |
| 5 | 3 | 5 | 2   | 5 | 2 | 5   | 2 | 2 |
| 4 | 3 | 2 | 1   | 4 | 3 | 5   | 3 | 1 |
| 3 | 5 | 2 | 3   | 5 | 1 | 4   | 2 | 1 |
| 4 | 2 | 2 | 3   | 4 | 3 | 5   | 2 | 2 |

|     |     |     |     |     |     |     |     |     |
|-----|-----|-----|-----|-----|-----|-----|-----|-----|
| 5   | 4   | 4   | 4   | 5   | 1   | 5   | 1   | 1   |
| 4   | 4   | 4   | 5   | 5   | 3   | 5   | 3   | 1   |
| 2   | 4   | 2   | 3   | 4   | 2   | 4   | 1   | 3   |
| 5   | 5   | 2   | 4   | 999 | 1   | 2   | 1   | 2   |
| 2   | 4   | 4   | 3   | 4   | 2   | 2   | 3   | 1   |
| 5   | 2   | 4   | 2   | 5   | 4   | 4   | 4   | 2   |
| 4   | 4   | 2   | 1   | 5   | 1   | 5   | 1   | 1   |
| 4   | 3   | 4   | 3   | 4   | 4   | 5   | 4   | 1   |
| 4   | 4   | 5   | 2   | 4   | 3   | 4   | 3   | 2   |
| 4   | 5   | 999 | 2   | 5   | 2   | 5   | 4   | 1   |
| 5   | 4   | 4   | 5   | 5   | 1   | 5   | 1   | 1   |
| 3   | 4   | 3   | 3   | 3   | 3   | 2   | 3   | 3   |
| 3   | 2   | 2   | 2   | 4   | 3   | 4   | 2   | 3   |
| 4   | 4   | 2   | 2   | 4   | 3   | 4   | 2   | 2   |
| 4   | 1   | 2   | 4   | 4   | 2   | 4   | 3   | 2   |
| 4   | 3   | 3   | 2   | 5   | 3   | 5   | 1   | 1   |
| 5   | 3   | 4   | 5   | 4   | 4   | 5   | 4   | 1   |
| 3   | 1   | 3   | 4   | 5   | 3   | 5   | 3   | 1   |
| 4   | 5   | 3   | 1   | 4   | 3   | 4   | 3   | 1   |
| 4   | 3   | 3   | 3   | 4   | 2   | 4   | 1   | 2   |
| 4   | 5   | 3   | 4   | 2   | 3   | 5   | 3   | 2   |
| 5   | 4   | 3   | 2   | 4   | 3   | 5   | 4   | 1   |
| 4   | 4   | 2   | 2   | 4   | 4   | 3   | 3   | 3   |
| 4   | 3   | 4   | 5   | 5   | 2   | 4   | 3   | 1   |
| 3   | 5   | 4   | 1   | 5   | 4   | 5   | 4   | 1   |
| 3   | 4   | 3   | 2   | 4   | 4   | 4   | 4   | 1   |
| 3   | 4   | 2   | 2   | 4   | 2   | 5   | 2   | 2   |
| 4   | 4   | 3   | 2   | 4   | 3   | 999 | 2   | 1   |
| 3   | 5   | 4   | 3   | 4   | 3   | 5   | 3   | 2   |
| 2   | 2   | 1   | 2   | 4   | 3   | 3   | 1   | 3   |
| 4   | 2   | 4   | 1   | 4   | 3   | 4   | 3   | 1   |
| 999 | 999 | 999 | 999 | 999 | 999 | 999 | 999 | 999 |
| 2   | 4   | 3   | 2   | 4   | 3   | 3   | 4   | 3   |
| 4   | 3   | 3   | 4   | 4   | 1   | 5   | 2   | 2   |
| 2   | 3   | 4   | 3   | 4   | 2   | 2   | 3   | 1   |
| 3   | 5   | 3   | 4   | 3   | 4   | 3   | 2   | 1   |
| 5   | 4   | 5   | 2   | 5   | 4   | 4   | 4   | 1   |
| 4   | 4   | 4   | 1   | 3   | 2   | 4   | 4   | 1   |
| 4   | 3   | 4   | 2   | 4   | 3   | 4   | 5   | 1   |
| 4   | 5   | 4   | 1   | 4   | 3   | 5   | 5   | 2   |
| 5   | 3   | 4   | 2   | 5   | 2   | 4   | 2   | 1   |
| 4   | 5   | 5   | 1   | 4   | 5   | 4   | 2   | 1   |
| 3   | 5   | 2   | 1   | 4   | 4   | 4   | 4   | 2   |
| 4   | 4   | 4   | 999 | 4   | 4   | 5   | 4   | 1   |
| 2   | 1   | 4   | 1   | 4   | 2   | 4   | 1   | 2   |
| 4   | 5   | 4   | 3   | 5   | 2   | 5   | 3   | 1   |
| 4   | 5   | 4   | 2   | 4   | 3   | 5   | 4   | 1   |
| 4   | 5   | 3   | 3   | 4   | 2   | 3   | 1   | 2   |
| 3   | 4   | 3   | 3   | 4   | 4   | 4   | 3   | 1   |
| 3   | 5   | 3   | 2   | 5   | 4   | 5   | 3   | 2   |

|     |     |     |     |     |     |     |     |     |
|-----|-----|-----|-----|-----|-----|-----|-----|-----|
| 4   | 4   | 5   | 3   | 5   | 5   | 5   | 2   | 1   |
| 4   | 4   | 4   | 2   | 4   | 4   | 3   | 4   | 1   |
| 4   | 5   | 3   | 2   | 4   | 2   | 4   | 4   | 1   |
| 3   | 3   | 3   | 3   | 3   | 3   | 3   | 3   | 3   |
| 4   | 2   | 4   | 3   | 2   | 2   | 4   | 2   | 2   |
| 4   | 4   | 5   | 3   | 5   | 2   | 4   | 3   | 1   |
| 999 | 999 | 999 | 999 | 999 | 999 | 999 | 999 | 999 |
| 3   | 5   | 4   | 3   | 4   | 3   | 3   | 3   | 2   |
| 4   | 4   | 4   | 1   | 4   | 4   | 4   | 4   | 1   |
| 5   | 4   | 3   | 3   | 4   | 1   | 4   | 3   | 1   |
| 4   | 5   | 4   | 1   | 4   | 5   | 5   | 3   | 1   |
| 3   | 3   | 4   | 3   | 5   | 1   | 5   | 3   | 2   |
| 4   | 3   | 2   | 2   | 4   | 4   | 3   | 3   | 1   |
| 4   | 4   | 4   | 2   | 4   | 3   | 4   | 2   | 2   |
| 5   | 5   | 5   | 2   | 5   | 2   | 5   | 3   | 999 |
| 4   | 4   | 4   | 1   | 5   | 2   | 4   | 3   | 1   |
| 4   | 1   | 4   | 5   | 5   | 1   | 4   | 2   | 3   |
| 4   | 5   | 4   | 1   | 5   | 4   | 4   | 4   | 1   |
| 4   | 5   | 4   | 3   | 5   | 3   | 4   | 4   | 1   |
| 3   | 5   | 3   | 2   | 5   | 3   | 3   | 2   | 1   |
| 3   | 4   | 3   | 3   | 5   | 2   | 5   | 2   | 3   |
| 2   | 4   | 4   | 2   | 5   | 3   | 4   | 2   | 1   |
| 3   | 4   | 4   | 3   | 4   | 3   | 5   | 4   | 1   |
| 4   | 4   | 4   | 2   | 4   | 3   | 4   | 3   | 4   |
| 5   | 4   | 4   | 2   | 2   | 999 | 4   | 2   | 1   |
| 4   | 4   | 4   | 2   | 4   | 4   | 3   | 3   | 3   |
| 4   | 4   | 4   | 2   | 4   | 2   | 3   | 4   | 2   |
| 4   | 4   | 3   | 2   | 4   | 3   | 4   | 4   | 1   |
| 2   | 4   | 4   | 1   | 4   | 2   | 3   | 3   | 1   |
| 4   | 5   | 3   | 2   | 5   | 3   | 4   | 4   | 1   |
| 4   | 3   | 4   | 3   | 5   | 1   | 4   | 1   | 2   |
| 5   | 5   | 4   | 4   | 5   | 5   | 4   | 3   | 1   |
| 999 | 999 | 999 | 999 | 999 | 999 | 999 | 999 | 999 |
| 4   | 2   | 3   | 1   | 4   | 2   | 4   | 3   | 1   |
| 4   | 4   | 3   | 2   | 4   | 2   | 1   | 3   | 1   |
| 4   | 5   | 3   | 2   | 4   | 3   | 5   | 2   | 2   |
| 5   | 4   | 4   | 1   | 5   | 4   | 4   | 4   | 1   |
| 4   | 5   | 3   | 2   | 3   | 3   | 3   | 3   | 1   |
| 4   | 4   | 4   | 3   | 5   | 3   | 5   | 3   | 1   |
| 3   | 3   | 4   | 2   | 4   | 2   | 5   | 3   | 1   |
| 5   | 5   | 5   | 2   | 5   | 2   | 5   | 4   | 1   |
| 2   | 3   | 4   | 3   | 4   | 2   | 4   | 1   | 2   |
| 3   | 2   | 3   | 5   | 3   | 3   | 3   | 1   | 1   |
| 5   | 4   | 2   | 3   | 4   | 3   | 1   | 1   | 1   |
| 3   | 3   | 4   | 2   | 4   | 2   | 3   | 3   | 2   |
| 3   | 4   | 4   | 3   | 4   | 2   | 4   | 2   | 2   |
| 4   | 2   | 5   | 3   | 5   | 1   | 5   | 3   | 4   |
| 3   | 5   | 4   | 3   | 4   | 3   | 4   | 2   | 3   |
| 4   | 4   | 3   | 2   | 4   | 3   | 5   | 3   | 1   |
| 5   | 4   | 5   | 1   | 5   | 2   | 5   | 2   | 1   |



|     |     |     |     |     |     |     |     |     |
|-----|-----|-----|-----|-----|-----|-----|-----|-----|
| 3   | 4   | 3   | 2   | 4   | 2   | 4   | 2   | 2   |
| 4   | 4   | 5   | 3   | 5   | 5   | 5   | 3   | 2   |
| 4   | 2   | 3   | 3   | 4   | 2   | 4   | 2   | 1   |
| 4   | 5   | 4   | 4   | 5   | 4   | 5   | 4   | 1   |
| 4   | 5   | 3   | 1   | 3   | 3   | 3   | 3   | 1   |
| 3   | 5   | 4   | 1   | 4   | 2   | 5   | 2   | 1   |
| 5   | 4   | 4   | 1   | 4   | 3   | 5   | 1   | 1   |
| 3   | 4   | 4   | 2   | 4   | 2   | 3   | 2   | 3   |
| 4   | 4   | 3   | 2   | 4   | 4   | 5   | 4   | 1   |
| 3   | 3   | 4   | 2   | 3   | 2   | 4   | 4   | 2   |
| 3   | 5   | 4   | 3   | 4   | 4   | 3   | 5   | 4   |
| 2   | 4   | 3   | 2   | 2   | 1   | 3   | 2   | 4   |
| 4   | 4   | 4   | 2   | 4   | 3   | 4   | 4   | 2   |
| 4   | 4   | 3   | 3   | 4   | 3   | 4   | 3   | 2   |
| 5   | 4   | 4   | 3   | 5   | 4   | 4   | 1   | 2   |
| 3   | 4   | 3   | 1   | 4   | 2   | 5   | 2   | 4   |
| 2   | 2   | 1   | 4   | 4   | 2   | 3   | 1   | 1   |
| 999 | 999 | 999 | 999 | 999 | 999 | 999 | 999 | 999 |
| 1   | 4   | 2   | 3   | 3   | 4   | 2   | 4   | 1   |
| 5   | 3   | 4   | 2   | 1   | 4   | 4   | 2   | 3   |
| 4   | 5   | 3   | 3   | 5   | 4   | 4   | 5   | 2   |
| 2   | 1   | 2   | 1   | 3   | 1   | 4   | 1   | 3   |
| 2   | 2   | 1   | 2   | 5   | 1   | 3   | 2   | 3   |
| 3   | 4   | 4   | 2   | 4   | 3   | 4   | 3   | 1   |
| 999 | 3   | 4   | 3   | 2   | 1   | 1   | 999 | 1   |
| 3   | 4   | 3   | 2   | 5   | 3   | 5   | 3   | 1   |
| 5   | 3   | 3   | 2   | 5   | 3   | 5   | 3   | 2   |
| 999 | 1   | 2   | 1   | 1   | 1   | 5   | 3   | 1   |
| 1   | 1   | 1   | 5   | 1   | 1   | 1   | 2   | 2   |
| 4   | 3   | 2   | 1   | 4   | 1   | 5   | 1   | 1   |
| 5   | 1   | 5   | 1   | 5   | 1   | 5   | 1   | 1   |
| 2   | 3   | 2   | 1   | 3   | 1   | 3   | 1   | 2   |
| 4   | 2   | 1   | 2   | 4   | 1   | 4   | 1   | 1   |
| 3   | 2   | 4   | 3   | 5   | 4   | 3   | 2   | 3   |
| 1   | 5   | 4   | 3   | 2   | 1   | 2   | 3   | 1   |
| 3   | 4   | 3   | 2   | 3   | 2   | 3   | 3   | 3   |
| 5   | 5   | 5   | 1   | 5   | 5   | 5   | 2   | 1   |
| 4   | 3   | 4   | 2   | 4   | 3   | 4   | 3   | 1   |
| 999 | 999 | 999 | 999 | 999 | 999 | 999 | 999 | 999 |
| 999 | 999 | 999 | 999 | 999 | 999 | 999 | 999 | 999 |
| 999 | 999 | 999 | 999 | 999 | 999 | 999 | 999 | 999 |
| 4   | 1   | 4   | 4   | 5   | 4   | 5   | 1   | 3   |
| 999 | 999 | 999 | 999 | 999 | 999 | 999 | 999 | 999 |
| 2   | 3   | 1   | 2   | 1   | 1   | 1   | 2   | 3   |
| 5   | 4   | 4   | 1   | 5   | 4   | 4   | 4   | 1   |
| 3   | 5   | 5   | 1   | 4   | 3   | 5   | 2   | 1   |
| 1   | 1   | 3   | 1   | 5   | 1   | 5   | 2   | 1   |
| 4   | 4   | 4   | 4   | 4   | 3   | 4   | 4   | 2   |
| 3   | 4   | 3   | 1   | 5   | 5   | 5   | 1   | 5   |
| 5   | 3   | 5   | 1   | 5   | 1   | 5   | 2   | 1   |

|     |     |     |     |     |     |     |     |     |
|-----|-----|-----|-----|-----|-----|-----|-----|-----|
| 1   | 4   | 3   | 4   | 3   | 2   | 4   | 3   | 2   |
| 3   | 2   | 4   | 4   | 5   | 3   | 4   | 1   | 3   |
| 4   | 3   | 2   | 4   | 4   | 1   | 4   | 1   | 3   |
| 4   | 4   | 3   | 1   | 5   | 4   | 4   | 4   | 1   |
| 4   | 2   | 4   | 4   | 5   | 2   | 5   | 2   | 2   |
| 999 | 2   | 3   | 3   | 2   | 3   | 2   | 1   | 2   |
| 5   | 5   | 2   | 1   | 5   | 1   | 5   | 2   | 1   |
| 5   | 4   | 4   | 2   | 4   | 1   | 5   | 4   | 1   |
| 4   | 4   | 4   | 1   | 5   | 2   | 4   | 3   | 1   |
| 2   | 3   | 4   | 3   | 5   | 3   | 4   | 3   | 2   |
| 4   | 3   | 3   | 4   | 4   | 3   | 4   | 3   | 2   |
| 4   | 1   | 4   | 3   | 5   | 3   | 5   | 3   | 2   |
| 999 | 999 | 999 | 999 | 999 | 999 | 999 | 999 | 999 |
| 999 | 999 | 999 | 999 | 999 | 999 | 999 | 999 | 999 |
| 4   | 4   | 4   | 2   | 3   | 3   | 4   | 4   | 4   |
| 5   | 1   | 4   | 1   | 4   | 4   | 4   | 3   | 5   |
| 4   | 3   | 5   | 1   | 5   | 1   | 5   | 2   | 1   |
| 3   | 3   | 4   | 5   | 4   | 4   | 4   | 3   | 4   |
| 5   | 4   | 4   | 2   | 5   | 1   | 5   | 4   | 1   |
| 3   | 3   | 4   | 2   | 4   | 2   | 5   | 3   | 2   |
| 4   | 1   | 2   | 3   | 5   | 1   | 5   | 2   | 1   |
| 999 | 999 | 999 | 999 | 999 | 999 | 999 | 999 | 999 |
| 4   | 1   | 4   | 3   | 4   | 1   | 4   | 2   | 1   |
| 4   | 4   | 3   | 2   | 4   | 2   | 3   | 4   | 3   |
| 4   | 1   | 3   | 3   | 5   | 1   | 4   | 2   | 1   |
| 5   | 5   | 5   | 1   | 5   | 4   | 5   | 999 | 1   |
| 3   | 1   | 3   | 5   | 3   | 2   | 5   | 3   | 1   |
| 5   | 4   | 3   | 1   | 5   | 1   | 5   | 1   | 1   |
| 5   | 5   | 5   | 1   | 5   | 4   | 5   | 1   | 1   |
| 4   | 4   | 5   | 1   | 5   | 2   | 4   | 4   | 2   |
| 4   | 4   | 4   | 3   | 4   | 3   | 5   | 3   | 2   |
| 5   | 1   | 5   | 1   | 5   | 1   | 5   | 3   | 5   |
| 3   | 5   | 4   | 3   | 5   | 2   | 5   | 3   | 4   |
| 3   | 2   | 2   | 2   | 3   | 2   | 4   | 3   | 2   |
| 4   | 5   | 3   | 5   | 5   | 4   | 5   | 1   | 3   |
| 3   | 2   | 2   | 3   | 3   | 2   | 2   | 3   | 3   |
| 4   | 4   | 3   | 4   | 5   | 1   | 3   | 1   | 1   |
| 4   | 2   | 2   | 3   | 4   | 1   | 4   | 1   | 3   |
| 3   | 2   | 1   | 3   | 2   | 2   | 2   | 1   | 1   |
| 2   | 999 | 1   | 1   | 2   | 1   | 4   | 1   | 4   |
| 5   | 1   | 1   | 1   | 5   | 1   | 5   | 1   | 1   |
| 2   | 2   | 2   | 4   | 4   | 2   | 3   | 1   | 2   |
| 3   | 2   | 3   | 2   | 4   | 3   | 4   | 2   | 3   |
| 3   | 5   | 3   | 3   | 5   | 1   | 3   | 3   | 1   |
| 3   | 3   | 3   | 4   | 4   | 2   | 4   | 3   | 2   |
| 4   | 2   | 3   | 3   | 4   | 2   | 3   | 1   | 3   |
| 4   | 2   | 2   | 2   | 4   | 2   | 4   | 2   | 2   |
| 3   | 2   | 3   | 2   | 2   | 3   | 3   | 3   | 2   |
| 5   | 3   | 3   | 3   | 4   | 2   | 4   | 3   | 2   |
| 4   | 1   | 4   | 5   | 3   | 1   | 4   | 3   | 2   |

|   |   |   |   |   |   |   |     |   |
|---|---|---|---|---|---|---|-----|---|
| 4 | 2 | 1 | 1 | 4 | 1 | 3 | 2   | 2 |
| 3 | 3 | 2 | 3 | 4 | 4 | 5 | 4   | 2 |
| 4 | 1 | 2 | 4 | 4 | 1 | 4 | 2   | 2 |
| 3 | 4 | 5 | 1 | 5 | 1 | 5 | 1   | 1 |
| 3 | 3 | 2 | 3 | 2 | 3 | 2 | 3   | 2 |
| 3 | 2 | 4 | 4 | 4 | 2 | 4 | 3   | 1 |
| 3 | 3 | 3 | 3 | 3 | 3 | 3 | 3   | 3 |
| 4 | 3 | 2 | 3 | 4 | 2 | 4 | 4   | 2 |
| 3 | 4 | 4 | 2 | 4 | 3 | 4 | 999 | 2 |
| 4 | 5 | 4 | 1 | 5 | 5 | 4 | 5   | 1 |
| 3 | 2 | 3 | 2 | 4 | 2 | 4 | 3   | 2 |
| 3 | 1 | 3 | 4 | 5 | 2 | 4 | 2   | 3 |
| 3 | 4 | 2 | 3 | 3 | 2 | 2 | 3   | 3 |
| 3 | 5 | 1 | 5 | 4 | 3 | 2 | 4   | 3 |
| 1 | 1 | 3 | 4 | 3 | 2 | 5 | 3   | 1 |
| 5 | 5 | 5 | 5 | 5 | 5 | 5 | 2   | 1 |
| 1 | 3 | 2 | 2 | 5 | 2 | 5 | 1   | 3 |
| 3 | 4 | 3 | 3 | 4 | 3 | 4 | 4   | 2 |
| 3 | 3 | 4 | 3 | 5 | 3 | 4 | 2   | 1 |
| 3 | 4 | 4 | 4 | 4 | 2 | 3 | 3   | 2 |
| 3 | 3 | 2 | 4 | 5 | 1 | 4 | 2   | 3 |
| 3 | 3 | 2 | 3 | 3 | 3 | 3 | 1   | 2 |
| 3 | 4 | 3 | 4 | 3 | 3 | 3 | 3   | 2 |
| 5 | 1 | 2 | 4 | 4 | 2 | 5 | 1   | 3 |
| 5 | 4 | 4 | 2 | 4 | 2 | 5 | 3   | 1 |
| 3 | 3 | 3 | 3 | 3 | 3 | 3 | 3   | 3 |
| 4 | 4 | 4 | 1 | 4 | 2 | 4 | 2   | 1 |
| 5 | 5 | 2 | 3 | 2 | 1 | 2 | 1   | 1 |
| 4 | 4 | 3 | 2 | 4 | 3 | 4 | 5   | 1 |
| 5 | 1 | 4 | 1 | 5 | 3 | 4 | 3   | 1 |
| 5 | 5 | 5 | 1 | 5 | 3 | 5 | 3   | 1 |
| 3 | 4 | 3 | 1 | 4 | 4 | 4 | 3   | 1 |
| 2 | 3 | 4 | 2 | 4 | 3 | 4 | 3   | 1 |
| 4 | 2 | 3 | 2 | 4 | 4 | 4 | 4   | 1 |
| 3 | 3 | 3 | 4 | 4 | 3 | 2 | 2   | 3 |
| 4 | 4 | 3 | 2 | 4 | 2 | 4 | 4   | 1 |
| 3 | 2 | 1 | 5 | 4 | 3 | 3 | 2   | 2 |
| 5 | 4 | 4 | 2 | 4 | 3 | 4 | 2   | 2 |
| 2 | 2 | 2 | 2 | 2 | 2 | 2 | 2   | 2 |
| 4 | 3 | 3 | 3 | 3 | 2 | 2 | 2   | 2 |
| 3 | 1 | 1 | 1 | 4 | 1 | 2 | 1   | 3 |
| 5 | 2 | 3 | 4 | 4 | 2 | 4 | 2   | 2 |
| 3 | 4 | 4 | 2 | 3 | 3 | 4 | 3   | 1 |
| 4 | 3 | 4 | 3 | 4 | 3 | 4 | 2   | 1 |
| 4 | 2 | 4 | 2 | 4 | 3 | 4 | 4   | 2 |
| 3 | 5 | 2 | 2 | 2 | 3 | 2 | 3   | 1 |
| 3 | 1 | 3 | 2 | 4 | 2 | 5 | 3   | 3 |
| 5 | 5 | 2 | 5 | 4 | 2 | 5 | 1   | 5 |
| 4 | 4 | 2 | 1 | 4 | 4 | 4 | 4   | 1 |
| 3 | 4 | 3 | 2 | 4 | 1 | 4 | 2   | 4 |

|   |     |   |   |     |   |   |   |     |
|---|-----|---|---|-----|---|---|---|-----|
| 2 | 5   | 5 | 2 | 2   | 3 | 4 | 2 | 2   |
| 4 | 2   | 4 | 5 | 4   | 1 | 5 | 3 | 1   |
| 4 | 3   | 4 | 2 | 5   | 2 | 4 | 3 | 1   |
| 3 | 2   | 3 | 2 | 5   | 2 | 3 | 2 | 2   |
| 3 | 3   | 3 | 3 | 3   | 3 | 3 | 3 | 3   |
| 5 | 5   | 5 | 5 | 999 | 1 | 5 | 1 | 1   |
| 2 | 3   | 2 | 4 | 2   | 4 | 2 | 3 | 4   |
| 4 | 2   | 1 | 1 | 5   | 5 | 5 | 1 | 5   |
| 4 | 4   | 4 | 3 | 4   | 3 | 5 | 3 | 2   |
| 5 | 2   | 5 | 2 | 5   | 3 | 5 | 4 | 1   |
| 3 | 1   | 3 | 2 | 4   | 1 | 5 | 1 | 3   |
| 4 | 1   | 4 | 2 | 4   | 4 | 4 | 3 | 1   |
| 3 | 4   | 3 | 3 | 4   | 3 | 3 | 2 | 4   |
| 3 | 1   | 1 | 2 | 2   | 2 | 1 | 1 | 4   |
| 5 | 5   | 5 | 1 | 5   | 1 | 5 | 5 | 1   |
| 4 | 3   | 4 | 3 | 4   | 1 | 5 | 3 | 999 |
| 3 | 4   | 3 | 3 | 4   | 2 | 3 | 4 | 3   |
| 4 | 4   | 4 | 2 | 4   | 3 | 4 | 3 | 2   |
| 3 | 4   | 5 | 5 | 5   | 3 | 4 | 4 | 1   |
| 3 | 3   | 3 | 3 | 3   | 3 | 3 | 4 | 1   |
| 3 | 4   | 1 | 4 | 2   | 1 | 5 | 2 | 1   |
| 3 | 999 | 4 | 2 | 4   | 2 | 3 | 2 | 3   |
| 1 | 1   | 1 | 1 | 2   | 2 | 2 | 1 | 2   |
| 4 | 3   | 4 | 1 | 5   | 3 | 5 | 1 | 3   |
| 4 | 5   | 3 | 2 | 5   | 5 | 4 | 3 | 1   |
| 3 | 3   | 3 | 2 | 3   | 2 | 4 | 1 | 2   |
| 2 | 1   | 2 | 2 | 4   | 3 | 4 | 2 | 1   |
| 4 | 4   | 3 | 1 | 4   | 4 | 4 | 3 | 1   |
| 4 | 4   | 3 | 2 | 4   | 3 | 5 | 3 | 1   |
| 4 | 4   | 3 | 4 | 4   | 3 | 4 | 4 | 2   |
| 5 | 4   | 5 | 1 | 5   | 3 | 5 | 4 | 1   |
| 3 | 4   | 5 | 3 | 5   | 1 | 3 | 3 | 2   |
| 2 | 3   | 2 | 4 | 4   | 2 | 2 | 2 | 2   |
| 2 | 5   | 4 | 1 | 3   | 1 | 4 | 4 | 1   |
| 5 | 5   | 5 | 1 | 5   | 5 | 5 | 5 | 1   |
| 4 | 5   | 3 | 3 | 4   | 4 | 4 | 4 | 1   |
| 4 | 4   | 4 | 1 | 5   | 4 | 5 | 4 | 1   |
| 3 | 3   | 4 | 4 | 5   | 2 | 5 | 3 | 1   |
| 1 | 1   | 1 | 3 | 5   | 1 | 2 | 1 | 4   |
| 2 | 4   | 1 | 3 | 1   | 2 | 3 | 2 | 4   |
| 3 | 4   | 2 | 5 | 4   | 4 | 3 | 3 | 2   |
| 4 | 4   | 4 | 1 | 5   | 2 | 5 | 2 | 1   |
| 3 | 4   | 4 | 1 | 4   | 2 | 4 | 4 | 1   |
| 3 | 3   | 4 | 3 | 5   | 1 | 5 | 3 | 3   |
| 3 | 3   | 3 | 3 | 3   | 3 | 3 | 3 | 3   |
| 2 | 3   | 4 | 3 | 5   | 3 | 2 | 3 | 4   |
| 4 | 5   | 5 | 2 | 4   | 4 | 5 | 4 | 1   |
| 4 | 1   | 2 | 2 | 3   | 1 | 4 | 5 | 2   |
| 4 | 3   | 2 | 4 | 4   | 2 | 3 | 2 | 1   |
| 3 | 1   | 1 | 2 | 5   | 3 | 5 | 2 | 1   |

|   |   |   |   |   |     |     |   |   |
|---|---|---|---|---|-----|-----|---|---|
| 3 | 4 | 4 | 4 | 4 | 3   | 3   | 3 | 2 |
| 2 | 3 | 2 | 3 | 3 | 2   | 3   | 2 | 1 |
| 3 | 2 | 3 | 3 | 4 | 2   | 3   | 3 | 2 |
| 4 | 3 | 3 | 1 | 3 | 2   | 3   | 3 | 1 |
| 3 | 2 | 4 | 2 | 4 | 1   | 4   | 1 | 3 |
| 3 | 3 | 3 | 3 | 3 | 3   | 3   | 3 | 3 |
| 4 | 4 | 2 | 1 | 2 | 1   | 4   | 1 | 1 |
| 3 | 5 | 3 | 2 | 3 | 4   | 3   | 3 | 2 |
| 3 | 2 | 4 | 2 | 5 | 3   | 5   | 2 | 1 |
| 3 | 3 | 3 | 3 | 3 | 2   | 2   | 1 | 2 |
| 2 | 2 | 1 | 2 | 2 | 2   | 2   | 3 | 2 |
| 4 | 2 | 5 | 4 | 5 | 3   | 5   | 2 | 1 |
| 3 | 4 | 3 | 3 | 4 | 3   | 4   | 2 | 3 |
| 5 | 4 | 5 | 3 | 5 | 2   | 5   | 3 | 1 |
| 4 | 4 | 3 | 2 | 4 | 4   | 4   | 2 | 1 |
| 3 | 4 | 3 | 4 | 4 | 2   | 3   | 4 | 2 |
| 4 | 4 | 4 | 5 | 5 | 2   | 5   | 2 | 1 |
| 3 | 2 | 3 | 3 | 3 | 2   | 3   | 3 | 2 |
| 3 | 2 | 3 | 4 | 4 | 3   | 4   | 3 | 3 |
| 5 | 4 | 5 | 3 | 4 | 1   | 5   | 4 | 1 |
| 1 | 5 | 4 | 1 | 4 | 1   | 5   | 4 | 1 |
| 5 | 4 | 5 | 3 | 5 | 2   | 5   | 4 | 2 |
| 5 | 4 | 3 | 2 | 5 | 1   | 5   | 3 | 1 |
| 4 | 5 | 3 | 5 | 5 | 3   | 4   | 4 | 1 |
| 4 | 1 | 3 | 2 | 2 | 1   | 2   | 2 | 1 |
| 3 | 1 | 3 | 1 | 4 | 2   | 5   | 2 | 1 |
| 4 | 4 | 3 | 2 | 4 | 2   | 4   | 3 | 3 |
| 4 | 3 | 2 | 4 | 3 | 999 | 2   | 3 | 4 |
| 3 | 2 | 3 | 1 | 3 | 2   | 4   | 3 | 2 |
| 2 | 2 | 3 | 2 | 4 | 2   | 3   | 4 | 2 |
| 4 | 3 | 1 | 2 | 5 | 3   | 4   | 3 | 1 |
| 3 | 1 | 1 | 2 | 3 | 3   | 2   | 3 | 2 |
| 4 | 1 | 3 | 4 | 4 | 2   | 4   | 3 | 2 |
| 4 | 3 | 1 | 2 | 3 | 4   | 5   | 3 | 1 |
| 3 | 4 | 2 | 3 | 4 | 1   | 4   | 4 | 1 |
| 4 | 4 | 3 | 3 | 4 | 2   | 3   | 3 | 3 |
| 3 | 4 | 2 | 5 | 4 | 2   | 1   | 2 | 3 |
| 2 | 3 | 4 | 3 | 3 | 3   | 3   | 2 | 1 |
| 4 | 3 | 2 | 3 | 3 | 3   | 3   | 3 | 1 |
| 3 | 4 | 3 | 3 | 5 | 2   | 4   | 3 | 2 |
| 4 | 3 | 3 | 3 | 3 | 3   | 2   | 3 | 2 |
| 4 | 4 | 3 | 3 | 3 | 3   | 3   | 4 | 4 |
| 1 | 1 | 2 | 2 | 3 | 5   | 999 | 5 | 3 |
| 2 | 2 | 2 | 2 | 4 | 2   | 3   | 2 | 3 |
| 4 | 3 | 3 | 2 | 4 | 2   | 4   | 4 | 2 |
| 4 | 4 | 3 | 1 | 5 | 4   | 5   | 2 | 5 |
| 3 | 4 | 4 | 2 | 5 | 2   | 5   | 2 | 3 |
| 5 | 2 | 3 | 3 | 4 | 2   | 3   | 2 | 3 |
| 5 | 1 | 3 | 5 | 4 | 1   | 5   | 2 | 3 |
| 3 | 4 | 5 | 4 | 4 | 4   | 3   | 2 | 3 |

|     |   |     |   |   |   |     |   |   |
|-----|---|-----|---|---|---|-----|---|---|
| 4   | 3 | 4   | 3 | 5 | 3 | 5   | 3 | 2 |
| 3   | 4 | 2   | 1 | 5 | 3 | 4   | 3 | 2 |
| 2   | 1 | 4   | 1 | 3 | 5 | 5   | 5 | 1 |
| 4   | 3 | 2   | 5 | 3 | 1 | 4   | 2 | 5 |
| 5   | 2 | 5   | 3 | 5 | 2 | 5   | 3 | 1 |
| 5   | 3 | 4   | 2 | 5 | 1 | 4   | 3 | 2 |
| 4   | 4 | 3   | 3 | 4 | 3 | 4   | 4 | 1 |
| 5   | 3 | 4   | 3 | 4 | 2 | 4   | 3 | 1 |
| 5   | 1 | 5   | 1 | 5 | 3 | 5   | 2 | 1 |
| 3   | 4 | 1   | 5 | 2 | 1 | 1   | 4 | 1 |
| 3   | 2 | 4   | 3 | 3 | 3 | 2   | 3 | 4 |
| 2   | 2 | 2   | 3 | 3 | 1 | 3   | 3 | 4 |
| 2   | 3 | 3   | 3 | 3 | 2 | 3   | 2 | 3 |
| 3   | 4 | 999 | 3 | 3 | 3 | 999 | 3 | 2 |
| 4   | 3 | 4   | 2 | 4 | 2 | 3   | 4 | 2 |
| 3   | 2 | 4   | 2 | 3 | 2 | 4   | 2 | 2 |
| 2   | 4 | 2   | 3 | 4 | 2 | 2   | 3 | 4 |
| 4   | 1 | 4   | 2 | 4 | 1 | 4   | 3 | 2 |
| 3   | 3 | 3   | 3 | 3 | 4 | 3   | 3 | 3 |
| 2   | 3 | 3   | 3 | 4 | 3 | 3   | 3 | 3 |
| 2   | 3 | 5   | 2 | 5 | 2 | 4   | 4 | 1 |
| 4   | 1 | 2   | 4 | 4 | 2 | 4   | 3 | 2 |
| 4   | 2 | 4   | 3 | 4 | 2 | 4   | 3 | 3 |
| 3   | 3 | 3   | 1 | 4 | 3 | 5   | 4 | 3 |
| 4   | 1 | 3   | 3 | 4 | 1 | 4   | 3 | 4 |
| 4   | 1 | 4   | 5 | 4 | 1 | 4   | 1 | 3 |
| 1   | 1 | 4   | 4 | 4 | 4 | 999 | 2 | 1 |
| 4   | 3 | 3   | 3 | 3 | 2 | 4   | 4 | 2 |
| 4   | 3 | 4   | 1 | 5 | 4 | 4   | 5 | 1 |
| 4   | 3 | 4   | 2 | 5 | 4 | 5   | 3 | 2 |
| 2   | 5 | 3   | 4 | 5 | 1 | 5   | 3 | 2 |
| 3   | 3 | 3   | 4 | 5 | 2 | 5   | 3 | 1 |
| 3   | 1 | 3   | 3 | 4 | 2 | 4   | 1 | 2 |
| 3   | 3 | 3   | 4 | 4 | 1 | 3   | 3 | 2 |
| 4   | 1 | 4   | 2 | 4 | 3 | 4   | 2 | 2 |
| 999 | 4 | 4   | 4 | 5 | 1 | 4   | 2 | 2 |
| 2   | 1 | 2   | 3 | 4 | 3 | 4   | 1 | 2 |
| 4   | 2 | 3   | 2 | 4 | 3 | 4   | 4 | 2 |
| 4   | 5 | 5   | 5 | 2 | 1 | 5   | 3 | 2 |
| 4   | 2 | 3   | 1 | 3 | 1 | 4   | 3 | 3 |
| 2   | 2 | 2   | 4 | 5 | 1 | 2   | 2 | 3 |
| 3   | 5 | 4   | 1 | 3 | 4 | 3   | 2 | 3 |
| 4   | 3 | 2   | 3 | 4 | 1 | 2   | 3 | 2 |
| 3   | 3 | 4   | 4 | 4 | 3 | 3   | 2 | 1 |
| 4   | 2 | 3   | 3 | 3 | 2 | 4   | 3 | 3 |
| 5   | 3 | 3   | 3 | 4 | 3 | 4   | 1 | 3 |
| 4   | 3 | 3   | 5 | 4 | 1 | 5   | 1 | 3 |
| 2   | 3 | 3   | 1 | 4 | 2 | 2   | 1 | 1 |
| 4   | 1 | 3   | 4 | 4 | 1 | 5   | 2 | 2 |
| 2   | 4 | 3   | 4 | 3 | 4 | 5   | 4 | 1 |

|     |     |     |     |     |     |     |     |     |
|-----|-----|-----|-----|-----|-----|-----|-----|-----|
| 4   | 2   | 2   | 4   | 3   | 4   | 4   | 2   | 2   |
| 4   | 4   | 3   | 5   | 5   | 1   | 4   | 2   | 3   |
| 3   | 1   | 4   | 5   | 4   | 1   | 4   | 3   | 4   |
| 5   | 4   | 5   | 1   | 5   | 5   | 5   | 4   | 1   |
| 4   | 3   | 3   | 4   | 4   | 2   | 5   | 1   | 4   |
| 4   | 4   | 4   | 3   | 4   | 3   | 5   | 4   | 1   |
| 3   | 2   | 4   | 4   | 4   | 2   | 4   | 2   | 1   |
| 3   | 2   | 2   | 5   | 5   | 1   | 3   | 1   | 1   |
| 4   | 1   | 4   | 2   | 4   | 4   | 4   | 4   | 2   |
| 4   | 4   | 2   | 3   | 4   | 3   | 4   | 1   | 3   |
| 3   | 4   | 3   | 4   | 4   | 2   | 4   | 4   | 4   |
| 2   | 4   | 2   | 2   | 3   | 2   | 2   | 3   | 2   |
| 2   | 1   | 2   | 1   | 3   | 1   | 5   | 2   | 2   |
| 5   | 5   | 5   | 5   | 5   | 1   | 5   | 3   | 4   |
| 3   | 2   | 4   | 3   | 4   | 2   | 4   | 4   | 2   |
| 5   | 1   | 3   | 5   | 5   | 1   | 5   | 3   | 1   |
| 3   | 3   | 3   | 3   | 4   | 2   | 4   | 4   | 2   |
| 4   | 5   | 4   | 2   | 4   | 3   | 3   | 2   | 4   |
| 4   | 3   | 3   | 4   | 4   | 4   | 4   | 3   | 5   |
| 3   | 4   | 3   | 3   | 3   | 2   | 3   | 3   | 2   |
| 2   | 3   | 4   | 1   | 4   | 1   | 4   | 4   | 3   |
| 2   | 3   | 3   | 3   | 4   | 4   | 4   | 3   | 2   |
| 4   | 3   | 1   | 4   | 4   | 4   | 4   | 3   | 3   |
| 4   | 2   | 4   | 4   | 4   | 3   | 5   | 4   | 2   |
| 1   | 3   | 1   | 3   | 4   | 2   | 2   | 3   | 3   |
| 3   | 4   | 3   | 1   | 4   | 1   | 4   | 2   | 1   |
| 999 | 999 | 999 | 999 | 999 | 999 | 999 | 999 | 999 |
| 4   | 3   | 5   | 2   | 4   | 1   | 4   | 4   | 1   |
| 2   | 2   | 2   | 3   | 3   | 3   | 2   | 3   | 2   |
| 4   | 4   | 4   | 2   | 4   | 3   | 4   | 1   | 2   |
| 4   | 5   | 4   | 2   | 5   | 3   | 4   | 1   | 3   |
| 4   | 2   | 4   | 1   | 5   | 1   | 4   | 2   | 3   |
| 4   | 2   | 3   | 2   | 4   | 4   | 4   | 3   | 2   |
| 3   | 1   | 3   | 1   | 5   | 3   | 2   | 2   | 1   |
| 3   | 2   | 3   | 4   | 4   | 2   | 3   | 4   | 1   |
| 4   | 4   | 3   | 1   | 5   | 3   | 2   | 4   | 3   |
| 5   | 5   | 4   | 1   | 5   | 2   | 4   | 4   | 1   |
| 2   | 1   | 3   | 3   | 3   | 3   | 2   | 4   | 3   |
| 4   | 3   | 4   | 4   | 4   | 3   | 4   | 3   | 3   |
| 4   | 3   | 4   | 2   | 5   | 4   | 3   | 4   | 1   |
| 4   | 3   | 4   | 3   | 3   | 3   | 4   | 3   | 2   |
| 1   | 4   | 3   | 2   | 3   | 1   | 3   | 4   | 3   |
| 5   | 4   | 4   | 2   | 4   | 2   | 999 | 3   | 2   |
| 3   | 4   | 3   | 3   | 4   | 2   | 3   | 2   | 3   |
| 2   | 3   | 3   | 3   | 4   | 3   | 3   | 4   | 3   |
| 4   | 3   | 3   | 3   | 4   | 2   | 4   | 4   | 2   |
| 5   | 3   | 5   | 1   | 5   | 1   | 3   | 1   | 5   |
| 4   | 3   | 2   | 1   | 2   | 4   | 3   | 2   | 3   |
| 3   | 4   | 3   | 1   | 5   | 4   | 4   | 3   | 2   |
| 4   | 2   | 4   | 2   | 4   | 2   | 4   | 3   | 1   |

|   |   |   |   |     |   |   |   |   |
|---|---|---|---|-----|---|---|---|---|
| 1 | 1 | 3 | 5 | 4   | 2 | 3 | 2 | 1 |
| 4 | 1 | 4 | 4 | 4   | 2 | 4 | 2 | 2 |
| 3 | 2 | 3 | 3 | 4   | 2 | 4 | 2 | 2 |
| 4 | 4 | 4 | 2 | 4   | 3 | 4 | 3 | 2 |
| 4 | 1 | 4 | 1 | 4   | 4 | 4 | 4 | 2 |
| 4 | 2 | 5 | 2 | 5   | 1 | 5 | 3 | 1 |
| 3 | 2 | 1 | 2 | 1   | 2 | 3 | 2 | 2 |
| 3 | 5 | 4 | 2 | 4   | 4 | 4 | 3 | 2 |
| 4 | 3 | 2 | 3 | 999 | 1 | 5 | 3 | 4 |
| 5 | 1 | 5 | 5 | 5   | 1 | 4 | 1 | 1 |
| 3 | 1 | 3 | 5 | 2   | 1 | 2 | 3 | 2 |
| 3 | 5 | 3 | 4 | 2   | 2 | 3 | 2 | 2 |
| 3 | 2 | 4 | 4 | 5   | 5 | 5 | 3 | 1 |
| 2 | 4 | 4 | 4 | 4   | 1 | 4 | 3 | 2 |
| 4 | 2 | 3 | 3 | 4   | 3 | 5 | 4 | 2 |
| 4 | 4 | 4 | 2 | 4   | 4 | 4 | 4 | 1 |



| BES19 | BES20 |
|-------|-------|
| 1     | 1     |
| 1     | 1     |
| 1     | 1     |
| 1     | 2     |
| 4     | 3     |
| 1     | 1     |
| 999   | 999   |
| 1     | 1     |
| 4     | 3     |
| 1     | 1     |
| 1     | 2     |
| 1     | 2     |
| 3     | 2     |
| 1     | 1     |
| 1     | 1     |
| 2     | 2     |
| 3     | 1     |
| 2     | 2     |
| 3     | 2     |
| 999   | 999   |
| 1     | 1     |
| 2     | 1     |
| 1     | 1     |
| 2     | 3     |
| 1     | 1     |
| 1     | 1     |
| 3     | 2     |
| 1     | 1     |
| 1     | 2     |
| 1     | 1     |
| 5     | 1     |
| 3     | 2     |
| 3     | 2     |
| 3     | 3     |
| 3     | 2     |
| 4     | 4     |
| 2     | 2     |
| 1     | 1     |
| 2     | 2     |
| 2     | 1     |
| 999   | 999   |
| 999   | 999   |
| 3     | 2     |
| 1     | 1     |
| 999   | 999   |
| 1     | 2     |
| 5     | 1     |
| 1     | 2     |
| 1     | 1     |

|     |     |
|-----|-----|
| 1   | 1   |
| 1   | 1   |
| 1   | 1   |
| 1   | 1   |
| 1   | 1   |
| 1   | 1   |
| 5   | 5   |
| 1   | 1   |
| 2   | 1   |
| 2   | 4   |
| 1   | 1   |
| 1   | 1   |
| 1   | 2   |
| 2   | 1   |
| 1   | 1   |
| 2   | 2   |
| 2   | 2   |
| 2   | 2   |
| 999 | 999 |
| 999 | 999 |
| 1   | 1   |
| 1   | 1   |
| 999 | 999 |
| 1   | 1   |
| 999 | 999 |
| 999 | 999 |
| 999 | 999 |
| 4   | 3   |
| 1   | 1   |
| 5   | 5   |
| 3   | 3   |
| 2   | 1   |
| 1   | 1   |
| 1   | 1   |
| 1   | 1   |
| 1   | 1   |
| 2   | 3   |
| 2   | 1   |
| 5   | 2   |
| 1   | 1   |
| 3   | 3   |
| 3   | 2   |
| 1   | 2   |
| 1   | 1   |
| 2   | 1   |
| 2   | 3   |
| 1   | 1   |
| 2   | 2   |
| 2   | 5   |
| 3   | 2   |

|   |   |
|---|---|
| 1 | 1 |
| 1 | 2 |
| 1 | 3 |
| 2 | 1 |
| 1 | 1 |
| 3 | 1 |
| 2 | 2 |
| 1 | 1 |
| 4 | 3 |
| 1 | 1 |
| 2 | 2 |
| 1 | 1 |
| 1 | 5 |
| 5 | 5 |
| 1 | 1 |
| 2 | 1 |
| 3 | 2 |
| 1 | 1 |
| 1 | 1 |
| 1 | 2 |
| 1 | 1 |
| 2 | 2 |
| 1 | 1 |
| 3 | 3 |
| 1 | 3 |
| 1 | 1 |
| 2 | 2 |
| 1 | 1 |
| 3 | 3 |
| 4 | 5 |
| 2 | 1 |
| 1 | 1 |
| 3 | 2 |
| 2 | 3 |
| 2 | 2 |
| 2 | 3 |
| 1 | 1 |
| 4 | 1 |
| 2 | 2 |
| 4 | 2 |
| 2 | 2 |
| 1 | 1 |
| 1 | 1 |
| 2 | 1 |
| 3 | 4 |
| 4 | 3 |
| 1 | 4 |
| 1 | 1 |
| 1 | 1 |
| 1 | 1 |

|   |   |
|---|---|
| 2 | 2 |
| 2 | 2 |
| 1 | 1 |
| 1 | 1 |
| 1 | 1 |
| 1 | 1 |
| 1 | 1 |
| 2 | 2 |
| 5 | 4 |
| 1 | 1 |
| 1 | 1 |
| 1 | 1 |
| 3 | 5 |
| 2 | 2 |
| 1 | 1 |
| 1 | 1 |
| 1 | 1 |
| 1 | 1 |
| 1 | 1 |
| 2 | 2 |
| 2 | 2 |
| 1 | 1 |
| 1 | 1 |
| 1 | 1 |
| 1 | 1 |
| 2 | 3 |
| 1 | 1 |
| 1 | 1 |
| 2 | 1 |
| 2 | 1 |
| 1 | 1 |
| 1 | 1 |
| 2 | 3 |
| 3 | 3 |
| 3 | 2 |
| 1 | 2 |
| 1 | 4 |
| 2 | 1 |
| 1 | 1 |
| 4 | 3 |
| 2 | 2 |
| 1 | 4 |
| 1 | 1 |
| 2 | 2 |
| 1 | 3 |
| 1 | 1 |
| 5 | 1 |
| 2 | 3 |
| 1 | 2 |
| 1 | 1 |

|     |     |
|-----|-----|
| 2   | 2   |
| 1   | 1   |
| 1   | 2   |
| 1   | 1   |
| 1   | 1   |
| 1   | 2   |
| 1   | 1   |
| 1   | 1   |
| 2   | 2   |
| 1   | 4   |
| 2   | 4   |
| 1   | 4   |
| 2   | 2   |
| 1   | 1   |
| 1   | 1   |
| 2   | 2   |
| 1   | 1   |
| 4   | 4   |
| 1   | 1   |
| 1   | 2   |
| 3   | 1   |
| 1   | 1   |
| 1   | 1   |
| 2   | 3   |
| 1   | 3   |
| 4   | 1   |
| 4   | 1   |
| 1   | 1   |
| 1   | 1   |
| 2   | 3   |
| 2   | 2   |
| 2   | 1   |
| 2   | 2   |
| 2   | 1   |
| 1   | 1   |
| 1   | 1   |
| 999 | 1   |
| 2   | 1   |
| 1   | 1   |
| 1   | 4   |
| 2   | 1   |
| 2   | 2   |
| 1   | 1   |
| 2   | 1   |
| 3   | 2   |
| 2   | 4   |
| 1   | 1   |
| 1   | 1   |
| 1   | 1   |
| 999 | 999 |

|   |   |
|---|---|
| 1 | 1 |
| 2 | 3 |
| 2 | 2 |
| 2 | 3 |
| 3 | 3 |
| 1 | 1 |
| 2 | 2 |
| 1 | 1 |
| 4 | 4 |
| 2 | 2 |
| 4 | 1 |
| 1 | 1 |
| 1 | 1 |
| 1 | 3 |
| 1 | 1 |
| 1 | 1 |
| 1 | 2 |
| 1 | 1 |
| 2 | 2 |
| 2 | 3 |
| 3 | 2 |
| 1 | 1 |
| 1 | 1 |
| 1 | 4 |
| 1 | 1 |
| 1 | 1 |
| 1 | 3 |
| 1 | 1 |
| 4 | 2 |
| 1 | 1 |
| 1 | 1 |
| 3 | 2 |
| 2 | 1 |
| 2 | 2 |
| 2 | 3 |
| 3 | 2 |
| 3 | 2 |
| 4 | 1 |
| 1 | 1 |
| 1 | 2 |
| 1 | 1 |
| 1 | 2 |
| 3 | 1 |
| 4 | 2 |
| 2 | 1 |
| 3 | 4 |
| 1 | 1 |
| 2 | 1 |
| 1 | 1 |
| 3 | 3 |

|     |   |
|-----|---|
| 1   | 1 |
| 2   | 3 |
| 2   | 1 |
| 2   | 1 |
| 1   | 1 |
| 2   | 1 |
| 1   | 1 |
| 1   | 1 |
| 2   | 1 |
| 1   | 1 |
| 2   | 1 |
| 2   | 1 |
| 1   | 1 |
| 1   | 1 |
| 1   | 1 |
| 5   | 1 |
| 3   | 2 |
| 2   | 1 |
| 1   | 2 |
| 3   | 3 |
| 1   | 1 |
| 1   | 1 |
| 999 | 3 |
| 5   | 1 |
| 2   | 3 |
| 1   | 1 |
| 2   | 2 |
| 1   | 1 |
| 1   | 1 |
| 4   | 2 |
| 3   | 2 |
| 1   | 1 |
| 4   | 1 |
| 1   | 1 |
| 1   | 1 |
| 2   | 2 |
| 3   | 2 |
| 2   | 2 |
| 1   | 1 |
| 1   | 1 |
| 1   | 1 |
| 1   | 2 |
| 3   | 1 |
| 1   | 1 |
| 1   | 1 |
| 1   | 1 |
| 1   | 1 |
| 3   | 2 |
| 1   | 1 |

|     |     |
|-----|-----|
| 1   | 1   |
| 1   | 1   |
| 3   | 2   |
| 2   | 1   |
| 1   | 1   |
| 2   | 1   |
| 5   | 2   |
| 1   | 1   |
| 2   | 3   |
| 1   | 1   |
| 1   | 1   |
| 2   | 2   |
| 2   | 3   |
| 2   | 1   |
| 1   | 1   |
| 1   | 2   |
| 4   | 1   |
| 4   | 1   |
| 1   | 1   |
| 2   | 2   |
| 2   | 2   |
| 1   | 2   |
| 3   | 2   |
| 1   | 1   |
| 1   | 1   |
| 2   | 2   |
| 1   | 1   |
| 2   | 3   |
| 2   | 2   |
| 3   | 5   |
| 1   | 1   |
| 999 | 999 |
| 2   | 2   |
| 2   | 1   |
| 1   | 1   |
| 4   | 2   |
| 1   | 2   |
| 3   | 2   |
| 1   | 2   |
| 2   | 2   |
| 1   | 1   |
| 3   | 2   |
| 2   | 2   |
| 1   | 1   |
| 3   | 3   |
| 1   | 1   |
| 2   | 1   |
| 4   | 4   |
| 1   | 1   |
| 2   | 3   |



|     |     |
|-----|-----|
| 4   | 1   |
| 2   | 2   |
| 1   | 1   |
| 3   | 3   |
| 2   | 2   |
| 2   | 2   |
| 999 | 999 |
| 1   | 1   |
| 1   | 1   |
| 4   | 2   |
| 1   | 1   |
| 1   | 1   |
| 2   | 2   |
| 1   | 1   |
| 1   | 1   |
| 1   | 2   |
| 1   | 2   |
| 4   | 1   |
| 1   | 1   |
| 2   | 2   |
| 3   | 3   |
| 1   | 2   |
| 1   | 1   |
| 3   | 4   |
| 1   | 1   |
| 3   | 3   |
| 2   | 1   |
| 2   | 2   |
| 4   | 1   |
| 2   | 1   |
| 2   | 3   |
| 5   | 5   |
| 999 | 999 |
| 1   | 1   |
| 1   | 1   |
| 2   | 2   |
| 4   | 1   |
| 1   | 2   |
| 4   | 1   |
| 1   | 1   |
| 1   | 1   |
| 1   | 1   |
| 3   | 3   |
| 3   | 2   |
| 2   | 2   |
| 2   | 2   |
| 1   | 1   |
| 1   | 2   |
| 1   | 1   |
| 1   | 1   |

|     |     |
|-----|-----|
| 1   | 1   |
| 2   | 1   |
| 2   | 2   |
| 1   | 1   |
| 1   | 1   |
| 1   | 1   |
| 1   | 1   |
| 1   | 1   |
| 1   | 1   |
| 4   | 1   |
| 3   | 3   |
| 5   | 4   |
| 3   | 2   |
| 2   | 2   |
| 3   | 3   |
| 4   | 2   |
| 3   | 5   |
| 1   | 1   |
| 999 | 999 |
| 3   | 4   |
| 4   | 1   |
| 4   | 4   |
| 3   | 1   |
| 3   | 1   |
| 3   | 1   |
| 1   | 1   |
| 1   | 1   |
| 2   | 1   |
| 2   | 1   |
| 1   | 3   |
| 1   | 1   |
| 1   | 1   |
| 3   | 3   |
| 2   | 2   |
| 2   | 3   |
| 5   | 5   |
| 2   | 2   |
| 1   | 1   |
| 1   | 4   |
| 999 | 999 |
| 999 | 999 |
| 999 | 999 |
| 4   | 3   |
| 999 | 999 |
| 3   | 5   |
| 1   | 1   |
| 1   | 4   |
| 1   | 1   |
| 3   | 2   |
| 1   | 3   |
| 1   | 1   |

|     |     |
|-----|-----|
| 2   | 2   |
| 3   | 2   |
| 1   | 3   |
| 1   | 1   |
| 3   | 2   |
| 2   | 2   |
| 5   | 1   |
| 2   | 1   |
| 2   | 1   |
| 3   | 1   |
| 4   | 1   |
| 1   | 1   |
| 999 | 999 |
| 999 | 999 |
| 3   | 4   |
| 5   | 1   |
| 1   | 1   |
| 2   | 2   |
| 1   | 1   |
| 1   | 1   |
| 1   | 1   |
| 999 | 999 |
| 5   | 1   |
| 999 | 999 |
| 3   | 1   |
| 1   | 1   |
| 2   | 3   |
| 1   | 1   |
| 1   | 1   |
| 2   | 1   |
| 1   | 1   |
| 5   | 1   |
| 1   | 3   |
| 3   | 3   |
| 1   | 4   |
| 3   | 4   |
| 1   | 2   |
| 2   | 1   |
| 1   | 1   |
| 3   | 3   |
| 1   | 1   |
| 3   | 3   |
| 3   | 2   |
| 3   | 1   |
| 2   | 2   |
| 3   | 3   |
| 2   | 4   |
| 3   | 2   |
| 3   | 4   |
| 3   | 4   |

|   |   |
|---|---|
| 1 | 1 |
| 2 | 3 |
| 3 | 4 |
| 1 | 1 |
| 3 | 3 |
| 1 | 2 |
| 3 | 3 |
| 2 | 1 |
| 2 | 2 |
| 1 | 1 |
| 3 | 3 |
| 2 | 3 |
| 3 | 4 |
| 2 | 2 |
| 5 | 1 |
| 1 | 1 |
| 5 | 2 |
| 2 | 1 |
| 2 | 2 |
| 2 | 2 |
| 5 | 3 |
| 3 | 5 |
| 3 | 2 |
| 2 | 4 |
| 1 | 1 |
| 3 | 3 |
| 4 | 1 |
| 1 | 1 |
| 1 | 4 |
| 3 | 3 |
| 1 | 2 |
| 2 | 3 |
| 2 | 2 |
| 1 | 1 |
| 2 | 2 |
| 2 | 2 |
| 3 | 2 |
| 2 | 2 |
| 2 | 2 |
| 2 | 3 |
| 2 | 2 |
| 2 | 1 |
| 2 | 3 |
| 1 | 1 |
| 2 | 3 |
| 3 | 3 |
| 2 | 3 |
| 2 | 5 |
| 4 | 3 |
| 1 | 1 |

|   |     |
|---|-----|
| 2 | 2   |
| 1 | 1   |
| 2 | 3   |
| 1 | 2   |
| 3 | 3   |
| 5 | 999 |
| 2 | 4   |
| 1 | 1   |
| 1 | 1   |
| 1 | 1   |
| 2 | 2   |
| 1 | 1   |
| 3 | 3   |
| 3 | 3   |
| 1 | 1   |
| 1 | 2   |
| 2 | 1   |
| 2 | 2   |
| 4 | 3   |
| 1 | 1   |
| 1 | 1   |
| 3 | 3   |
| 1 | 3   |
| 1 | 1   |
| 2 | 1   |
| 3 | 2   |
| 3 | 2   |
| 4 | 2   |
| 2 | 1   |
| 3 | 2   |
| 1 | 1   |
| 3 | 3   |
| 3 | 2   |
| 1 | 2   |
| 1 | 1   |
| 1 | 1   |
| 1 | 1   |
| 2 | 2   |
| 2 | 1   |
| 5 | 3   |
| 3 | 4   |
| 3 | 2   |
| 2 | 1   |
| 3 | 3   |
| 3 | 3   |
| 2 | 3   |
| 1 | 1   |
| 2 | 3   |
| 3 | 999 |
| 2 | 2   |

|   |   |
|---|---|
| 3 | 2 |
| 3 | 2 |
| 3 | 2 |
| 1 | 1 |
| 2 | 3 |
| 3 | 3 |
| 4 | 4 |
| 3 | 3 |
| 1 | 2 |
| 1 | 1 |
| 2 | 1 |
| 1 | 1 |
| 3 | 2 |
| 3 | 1 |
| 2 | 4 |
| 3 | 2 |
| 2 | 1 |
| 2 | 1 |
| 2 | 2 |
| 2 | 1 |
| 1 | 1 |
| 1 | 1 |
| 1 | 1 |
| 1 | 1 |
| 1 | 2 |
| 1 | 1 |
| 1 | 1 |
| 3 | 2 |
| 1 | 2 |
| 4 | 2 |
| 1 | 1 |
| 4 | 2 |
| 2 | 2 |
| 2 | 3 |
| 2 | 2 |
| 3 | 2 |
| 2 | 1 |
| 3 | 3 |
| 3 | 3 |
| 2 | 1 |
| 2 | 3 |
| 2 | 1 |
| 2 | 1 |
| 2 | 5 |
| 2 | 2 |
| 2 | 1 |
| 2 | 1 |
| 2 | 3 |
| 2 | 2 |
| 4 | 4 |

|   |   |
|---|---|
| 1 | 2 |
| 3 | 2 |
| 2 | 5 |
| 3 | 1 |
| 1 | 1 |
| 2 | 1 |
| 4 | 2 |
| 1 | 1 |
| 1 | 1 |
| 4 | 2 |
| 2 | 3 |
| 2 | 2 |
| 3 | 3 |
| 3 | 4 |
| 2 | 2 |
| 3 | 3 |
| 3 | 4 |
| 2 | 4 |
| 2 | 4 |
| 3 | 3 |
| 1 | 5 |
| 1 | 1 |
| 2 | 2 |
| 4 | 3 |
| 1 | 3 |
| 2 | 1 |
| 3 | 1 |
| 1 | 1 |
| 2 | 1 |
| 1 | 1 |
| 3 | 1 |
| 2 | 2 |
| 2 | 1 |
| 2 | 1 |
| 2 | 1 |
| 1 | 1 |
| 3 | 2 |
| 2 | 2 |
| 1 | 1 |
| 4 | 3 |
| 1 | 1 |
| 4 | 1 |
| 3 | 4 |
| 1 | 2 |
| 3 | 3 |
| 1 | 1 |
| 3 | 3 |
| 1 | 1 |
| 5 | 1 |
| 1 | 2 |

|     |     |
|-----|-----|
| 2   | 2   |
| 1   | 1   |
| 2   | 2   |
| 1   | 1   |
| 1   | 2   |
| 2   | 1   |
| 2   | 2   |
| 1   | 1   |
| 2   | 3   |
| 2   | 2   |
| 2   | 2   |
| 1   | 2   |
| 2   | 2   |
| 1   | 1   |
| 3   | 4   |
| 1   | 1   |
| 3   | 2   |
| 4   | 3   |
| 2   | 2   |
| 4   | 3   |
| 2   | 2   |
| 1   | 2   |
| 2   | 1   |
| 1   | 1   |
| 2   | 2   |
| 3   | 3   |
| 999 | 999 |
| 1   | 1   |
| 2   | 3   |
| 2   | 2   |
| 3   | 3   |
| 1   | 4   |
| 2   | 1   |
| 2   | 3   |
| 2   | 3   |
| 2   | 4   |
| 1   | 1   |
| 4   | 1   |
| 2   | 2   |
| 2   | 2   |
| 4   | 3   |
| 4   | 2   |
| 4   | 4   |
| 4   | 4   |
| 3   | 3   |
| 2   | 2   |
| 1   | 1   |
| 4   | 3   |
| 2   | 3   |
| 2   | 2   |



|   |   |
|---|---|
| 1 | 1 |
| 2 | 2 |
| 2 | 2 |
| 4 | 2 |
| 2 | 1 |
| 5 | 1 |
| 2 | 3 |
| 2 | 3 |
| 3 | 3 |
| 2 | 1 |
| 3 | 3 |
| 2 | 3 |
| 1 | 1 |
| 3 | 3 |
| 2 | 1 |
| 1 | 1 |
